# Supplementary material for: Target-agnostic identification of human antibodies to Plasmodium falciparum sexual forms reveals cross-stage recognition of glutamate-rich repeats
Source: eLife. 2025 Jan 16;13:RP97865. doi: 10.7554/eLife.97865 (PMC11737873; doi:10.7554/eLife.97865)
Supplement: Figure 2—source data 1. [file elife-97865-fig2-data1.xlsx]

## Sheet: Raw SMFA data
Raw oocyst count data from four independent standard membrane feeding assays (exp #1 - #4). These data were used to calculate transmission reducing activity shown in Figure 2b. FCS was used as a negative control to calculate TRA, while 2A2 was included as a complement-dependent positive control mAb.
experiment	sample	conc (µg/mL)	oocyst counts per mosquito																					Mean
#1	FCS		8	0	2	12	0	18	3	9	0	19	0	0	23	4	6	9	0	0	0	1		5.7
	FCS		23	18	28	12	2	12	13	3	9	0	8	10	29	11	4	0	22	16	9	3		11.6
	2A2	10	1	0	0	0	0	0	0	0	0	0	0	1	1	0	0	0	0	0	0	0		0.15
	VRC01	500	14	6	2	0	8	11	4	18	9	17	23	15	12	14	10	16	7	3	4	8		10.05
	B1D3L	500	0	0	0	0	0	0	0	0	1	0	3	0	0	0	2	0	2	0	2	0		0.5
	B1E7K	500	12	0	13	5	15	21	9	17	7	1	19	16	10	2	6	0	5	16	4	7		9.25
	B1C3L	500	7	22	9	0	11	5	0	8	23	1	9	4	2	0	13	2	0	7	6	10		6.95
	B1C8L	500	1	0	0	0	0	0	0	0	0	0	0	1	1	0	0	0	2	0	0	0		0.25
	B1F9K	500	0	2	0	0	2	1	0	1	2	0	1	0	0	0	2	0	3	0	0	0		0.7
	B1C5L	500	2	0	0	0	1	0	1	0	0	0	1	0	1	3	0	2	0	0	1	4		0.8
	B1C5K	500	0	0	0	0	1	1	0	0	1	0	0	0	1	0	2	3	0	0	2	0		0.55
	B2C10L	500	0	2	0	1	1	0	0	0	1	2	0	0	1	0	0	0	1	0	0	0		0.45
	B2E9L	500	0	0	0	0	0	0	6	0	4	0	0	0	2	1	3	0	0	1	0	4		1.05
#2	FCS		1	12	2	0	3	7	8	3	8	2	6	2	3	3	10	6	5	9	6	12		5.4
	FCS		3	3	2	6	4	7	3	9	4	7	2	1	0	4	8	11	3	15	19	2		5.65
	2A2	10	0	0	0	0	0	0	0	0	0	0	0	0	0	0	0	0	0	0	0	0		0
	B1D3L	500	0	0	0	0	0	0	0	0	0	3	0	0	0	0	0	0	0	0	0	0		0.15
	B1C8L	500	0	0	0	0	0	0	2	2	0	0	1	0	0	0	1	0	0	0	0	0		0.3
	B2E9L	500	1	0	2	0	0	0	0	0	0	0	0	0	0	0	1	0	0	0	0	0		0.2
	B1F9K	500	0	0	0	0	12	3	0	1	0	1	0	0	0	1	0	0	0	0	0	0		0.9
	B1C5L	500	2	0	1	0	0	0	0	0	0	0	2	0	0	0	4	0	0	0	1	0		0.5
	B1C5K	500	0	0	2	0	0	0	0	0	0	0	2	0	0	0	0	0	2	0	1	0		0.35
	B2C10L	500	0	0	0	0	0	0	0	0	0	0	0	0	0	0	0	0	0	0	0	0		0
#3	FCS		2	6	3	11	15	3	7	19	0	12	2	5	7	2	6	1	6	9	7	5		6.4
	FCS		19	18	11	6	2	8	11	21	0	5	0	5	17	27	13	5	5	13	18	7		10.55
	2A2	10	0	0	0	0	0	0	0	0	0	0	0	0	0	0	0	0	0	0	0	0		0
	VRC01	500	5	1	2	0	15	2	2	4	4	6	1	7	7	10	13	7	8	27	7	9		6.85
	B1E11k	500	10	6	13	18	12	7	14	9	10	11	9	6	8	0	9	13	8	7	17	12		9.95
	B2D10L	500	15	14	21	12	28	21	18	19	30	1	2	4	17	12	6	9	10	8	12	8		13.35
	B2F7L	500	9	12	10	6	13	12	8	15	17	16	32	11	4	24	14	5	4	18	9	14		12.65
	B1C8K	500	6	4	5	6	8	8	9	6	17	3	5	21	6	7	14	6	6	18	7	2		8.2
	VRC01	100	19	11	8	5	18	8	21	16	14	18	21	6	22	9	10	1	4	11	4	13		11.95
	B1C5K	100	8	14	9	16	7	8	9	10	12	24	6	3	17	19	14	9	15	18	9	13		12
	B1C5L	100	3	18	3	4	18	21	0	23	14	5	14	13	9	13	4	12	5	17	6	18		11
	B1D3L	100	11	3	8	18	6	0	13	19	6	13	5	5	12	0	8							8.46667
	B2C10L	100	3	0	6	5	2	4	0	0	0	4	7	0	9	1	0	3	0	0	3	2		2.45
	B2E9L	100	9	1	2	5	22	6	16	8	17	19	11	17	1	8	4	11	7	1	12	5		9.1
	B1C8L	100	3	9	3	6	11	10	4	3	4	9	9	8	1	8	0	2	6	3	6	10		5.75
	B1F9K	100	7	14	9	12	13	21	8	3	6	8	6	4	13	11	8	19	6	21	18	10		10.85
#4	FCS		19	15	18	43	12	5	24	35	3	9	14	11	10	27	32	10	5	19	24	19		17.7
	FCS		16	11	30	34	9	72	21	22	22	16	16	29	35	34	28	8	6	18	24	36		24.35
	2A2	10	0	0	0	0	0	0	0	0	0	0	0	0	0	0	0	0	0	0	0	0		0
	VRC01	100	30	28	26	5	8	15	19	33	25	27	35	28	33	45	41	14	11	19	11	52		25.25
	B1D3L	100	8	1	8	4	6	16	1	7	0	2	9	0	1	2	8	6	7	19	3	5		5.65
	B1C8L	100	4	2	4	0	0	1	3	1	4	0	0	0	0	0	4	0	4	0	0	3		1.5
	B1F9K	100	3	2	9	6	0	2	13	5	3	1	2	4	0	5	4	0	12	13	13	2		4.95
	B1C5L	100	0	6	0	11	9	0	8	1	18	6	0	2	9	4	3	1	2	3	18	2		5.15
	B1C5K	100	6	0	2	18	1	1	7	0	0	0	0	1	18	1	3	3	14	1	15	2		4.65
	B2C10L	100	7	0	7	0	0	6	0	0	0	1	9	1	3	1	6	6	5	5	2	1		3
	B2E9L	100	2	3	6	2	0	4	2	11	1	10	11	5	3	6	22	1	5	14	18	4		6.5
