# Supplementary material for: Target-agnostic identification of human antibodies to Plasmodium falciparum sexual forms reveals cross-stage recognition of glutamate-rich repeats
Source: eLife. 2025 Jan 16;13:RP97865. doi: 10.7554/eLife.97865 (PMC11737873; doi:10.7554/eLife.97865)
Supplement: Figure 3—source data 1. [file elife-97865-fig3-data1.xlsx]

## Sheet: Raw target data _edit
[GeneID]	[Gene Feature ID]	DNA Sequence	Size (bp)	cor_b1e11k_3	norm_b1e11k_3
PF3D7_0220000	PF3D7_0220000_e2s1	TCTGATATAAACAAGAGTTGGAAAAAAAATACGTATGTAGATAAGAAATTGAATAAACTATTTAACAGAAGTTTAGGAGAATCTCAAGTAAATGGTGAATTAGCTAGTGAAGAAGTAAAGGAAAAAATTCTTGACTTATTAGAAGAAGGAAATACATTAACTGAAAGTGTAGATGATAATAAAAATTTAGAAGAAGCCGAAGATATAAAGGAAAATATCTTATTAAGTAATATAGAAGAACCAAAAGAAAATATTATTGACAATTTATTAAATAATATTGGACAAAATTCAGAAAAACAAGAAAGTGTATCAGAAAATGTACAAGTCAGTGATGAACTTTTTAATGAATTATTAAATAGTGTAGATGTTAATGGAGAAGTAAAAGAAAATATTTTGGAG…	2268	59988.5	6.25349
PF3D7_1149200	PF3D7_1149200_e2s1	GGAAATTTTGGATATAATGGAAGTTCAAATTCTGGTGCACAATTTACTGACAGGTGCTCAAGAAATTTATACTGTGAAACATTGCCAATCAACCCATATGCTGATTCTGAAAACCCAATAGTTGTAAGTCAGGTATTTGGTTTACCTTCCGAAAAACCTACGTTTACGTTAGAAGGTACTCCTGATATTGATCATACAAATATTTTGGGTTTTAATGAGAAGTTGATGACTGATGTAAATAGATATCGATATTCTAATAACTATGAAGCCATTCCCCATACAAGGGAGTTCAATCCACTTATTGTAGATAAAGTTCTTTTCGACTATAACGAAAAGGTTGATAACTTAGGAAGGAGTGGAGGAGACATTATAAAAAAAATGCAAACTTTATGGGATGAA…	1569	54235.5	6.19345
PF3D7_0309100	PF3D7_0309100_C	ATGCTCGAGATGAATATGATCATGAAGATCTACTATATTTTCCTGCTGTTTGTTTTCATCCTGATCGAGCGCTGCGTTGATAACGACGTTATCAACAAAACCCAGGAGAACTACTTGGACCACCGTGATTTTGAGAAGGACATGGACGAACTGGACTTATCAGGGCTTGAGTACGACATCGAGAACGTGGAAGAAATTGCGCAGAAGGATAGCTATAACTACGTCACGCAGATTTACGTCTACATTCGCATCGACGAAGAGTACAAGAAGTACATTAACCACCTGGAGTTAATGCGCCTTGGCCAGCGCTTTATGACTATTCTGCAAAACGCAATGATCAACGTACAATTAAAGAAGACCGGCACAGGTATCTTCACGTGCTTCTACGAAAACAAGTCG…	617	57356	6.18856
PF3D7_0102200	PF3D7_0102200_e2s2	AACGAAGCCTACCAAGTTTTAGGAGATATTGATAAAAAAAGATGGTACAATAAATACGGATATGATGGAATAAAACAAGTCAACTTTATGAATCCATCCATCTTTTATTTATTATCTAGTTTAGAAAAATTTAAAGATTTTACCGGAACACCCCAAATAGTAACTCTTTTGAGATTCTTTTTTGAAAAGAGATTATCTATGAATGATTTAGAGAATAAAAGTGAACATTTATTAAAATTTATGGAACAATATCAAAAAGAAAGAGAAGCACATGTATCTGAATATTTATTAAATATATTACAACCATGTATAGCTGGTGATTCAAAATGGAATGTACCAATTATAACAAAACTTGAAGGTTTAAAAGGATCTCGCTTTGATATACCAATATTAGAATCT…	1554	53268	6.04456
PF3D7_1127500	PF3D7_1127500_C	ATGCTCGAGATGATCATTAAGTTCCTGATCTTTAACTTGCTGTTATACCTGTTCCGCTGCAACACGAAAGTGAACTTCACGTACCCGCAGAACGACTTTCTTCGCATCGACAGCGAGAACATCGAAGAGGCCTTCGAAAACAACGACTATTGGCTGATCAACTTCTACGCCCCTCAATGCGTATACTGTAAATTTATCTGGGACAAGTTGCGCTATATTCAGCGCAGCATCCAGAACGAGAACCGCACCAAGATCTACTTTGGCGAGGTGAACTGCGACAATCAAAAGGGGTATACGGTATGCGAGATTTACGGGGCGATGCGCGTGCCGCAGCTGAAGCTGTTTAAGGGTTCCGAGCTTATTTCGACCTACTCGAACGACATTACGAACTACAACAAC…	1355	44843.5	5.9134
PF3D7_1036300	PF3D7_1036300-S2	ATTAACTACACTGACATTAAGACGCTCTCACCAAGTGAGTACTTGATCGAGAAGTGCCCCGAGTGTAAGTGCACTAAGAAGAACCTGCAGGACGTGTTCGAGCTGACCTTCGACGGTAAGGCCTTGCTCGAGAAACTGAAGAAGGAAGAGAGCCCGGTATCGAACTCAGTCAACGCACTGCCGGAGCCGGGGCAGATCACCCTGCCGGACCCGAGTTTGAAGCAGACCACCCAACAAGAGAACCAGCCGGTGGTGGAGACCCCGGTAACAACTGCAGTAATCAACGAGCACCAGGGGCAGACCGAGCCTAACAAGGGCGATAATAACAACGAGCGCGAGAACCACGAGTCGAACGTAGGATCAATTCAGGAAGTGAATCAGGGCTCGGTAAGTGAGGAG…	1020	32032.5	5.43325
PF3D7_0411700	PF3D7_0411700	ATGAAAGGTTTAAAGGTCTTCATGAGGAGCTTTGTTTATTTTGTTCTTGTATGTAATTTAATTAATAATGTAATAATATGTCATAAAATCAACTATGAAAACATTGAAGAAAACCCCCAAATTAATGATCAAAATATTATGGAAATATTAAATTCGAGCGTCTTAAATAATAATATGAAAAAAGAGAAAGAGAAAAATATTTTATATGATATTTCTTATTATATTGAATATTTAAAAATAATAAATTCATTAGATAATAAATATAATGACAAGTTCCATAAAGCCATACTAAATATAGATACAACAAAAAAAAAGAAAGAAAAAAAAAATATAGACCTTATATACTACTCAGGAAAAAAATATAACAATAATATAAAGGATATTAAAAAACAACTTCAT…	414	25673.5	5.11188
PF3D7_1038400	PF3D7_1038400_e2s1	GTAATACCTGAAGAAGTTGTTGAAGAAATAATAACTGAAGAGATTGCTGAAGAAATAATACCTAAAGAATTAGTTGAAGAGGTGATACCTGAAGAAGTTGTTGTAGAGATTATACCTGAGAAATTAGTTGAAGAGTTTGTAAGTGAAGAATTAGTTGAAGAGTTGGTACCTGAAGAAATTGTTGAAAAGGTTGTCCCAGAGGAATTAGTTGAAGAGATTGTACCAGAGGAATTAGTTGAAGAGGTTGTACCTGAAGAACTAGTAGAAGAAGTTATACCAGAGGAATTAGTTGAAGAGTTTATACCTGAAGAAGTTGTGGAAGAGGTTTTACCAGAACAATTAGTTGAAGAGGTGATATCAGAAGTAGTTGAAGAGGTTGTACCAGAGGAATTAGTTGAA…	1974	21787	4.76391
PF3D7_1149200	PF3D7_1149200_e2s2	CCTGATACAAGATTCTATGATATATTAGGTGTTGGAGTTAATGCAGATATGAAGGAAATCTCTGAAAGTTATTTTAAATTAGCAAAACAATATTATCCACCAAAATATTCAGTTAATGAAGGAATGTTAAAATTTAAACAAATAAGTGAAGCATATCAAATATTGGGAGATATTGATAAAAGAAAAATGTATAATAAATTTGGATATGATGGAATAAAGGGAGTTAACTTCATTCACCCAACCATATATTATATGTTAGCTAGTTTAGAAAAATTTGCTTTTTATACTGGATCTCCTCAAATAGTAACCCTTATGAAATTCTTATTTGAAAAGAAATTAACAGTAAATGACTTAGATACAAAATCTGAACATTTATCAAAAATAATGGGAGTGTATCAA…	1563	20946.5	4.72333
PF3D7_0804500	PF3D7_0804500_e3	CTGAAAATTTACGAAATCCTCCCGGGGCTTCAAGTGGTTTTCATCAAAGAAATCGAAATAAAACATGATGTAAGCCCCAAGAAATGCATATGTGAAGAAAAAATTCATGAACTAAAAGAAAGAAGGAAAAAAGAAGAACATGAAAATGAAGGAATTTCTATTTTTAACCTCTCTTATTTTTTATCATCAAATTATCATAAAAAACAAAGTAATACAAGAAGTGATGAAAAAATGAATTCATCATATAATTATTCATATAATCGTATGCCATCTGATAATAACAAAAGTAATAATTTATTAAATGGATCAGCACAAAATGTTAATACAAACGATTCGAAAAAAACAGTACAATTATATTCTTTCCAAAAAAATGATAAGAAAAAAGAAAAAAACACAAAC…	645	19703	4.61096
PF3D7_1038400	PF3D7_1038400_e7s1	AAGGTTGTACCAGAAGAACTAGTAGAAGAAGTTATACCTGAAGAAATTGTTGAAGAGGTTATACCTGAGGAATTGATTGAAGAGTTTGTACCAGAGGAATTAGTTGAAGAAGAAGTACCTGAAGAACTAGTAGAAGAAGTTATACCTGAAGTATTAGTTGAAGAGGTTATACCTGAAGAATTTGTTGAAGAGGTGATACCTGAAGAACTAGTAGAAGAAGTTATACCTGAAGAACTATTTGAAGAGGTTGTACCAGAAGAACTAGTAGAAGAAGTTATACCTGAAGAAATTGTTGAAGAGGTTATACCTGAGGAATTGATTGAAGAGGTTGTACCAGAGGTATTAGTTGAAGAGGTGATACCTGAAGAACTAGTAGAAGAAGTTATACCTGAAGAACTA…	2484	12776.5	3.98611
PF3D7_1038400	PF3D7_1038400_e5s3	GAAGAATTGATTGAAGTGGTTGTACCAGAGGAATTAGTTGAAGAGGTGGTACCAGAAGAACTAGTAGAAGAGGTGGTACCAGAAGAAGTAGTAGAAGAAGTTATACCAGAAGAACTAATTGAAGAATTAGTACCTGAAGTAGAAATTGAGGAGATATTACCAGAAGAACTAATTGAAGAATTAGTACCTGAAGAAATAATTGAGGAAGTTATACCTAAGGAATTGATTGAAGAAGTGATACCAGAAGTAGTTGTTGAAGAGGTTGTACCAGAGGTATTAGTTGAAGAGGTGGTACCAGAAGAACTAGTAGAAGAAGTTATACCTGAGGTATTAGTTGAGGAAGAAGTACCTGAAGAACTAGTAGAAGACGTTATACCAGAGGAATTAGTTGAAGAGGTG…	2334	11117.5	3.75704
PF3D7_0909000	PF3D7_0909000-S2_C	ATGCTCGAGTACAACGACATCTGCGTTTGCATCAACAACCTTAACAACATGAAAGTCAAGAAGGCATTCTTCATGGTGCAGGACCTGTTCATCAAGAAGTACAACTGCAACAAGAAGAAGCGCAAGCTGTTCCTGCGCAACATTTTCATCAGCGAGATTCTGTACCGTTACAAGATCATTAAGAAGACTGAGATCATCTTTAACATGAACAACGAGCCGCCGTGCGACAATTACATGAAGTACAGCATCATTTCGAAGCGTCTGTACCGCAACTACACGTTCGACTACATCATCGACCTGATTGACGTCAACGGCAAGGTGTGCTTCATGAAGTACATTAGCTGCCTCAACAAGATCAACCACTACTTCAAGAACATCAAGTTAAAGAGCATCGAGATC…	1670	10267	3.68909
PF3D7_1038400	PF3D7_1038400_e1s1	ATGAAAACAAAATACAAAACATTGATGGTAAATATTGATGATAATGATTTAGGAAAAAGAGGAAATAAAATAAAACCGAAACATAAGAAGGTTGAAATAAACTTAAACGATAATAATTTATCTAATAATGAAAGTAAGAGAAAAAGTAGGAGAAAAAAAGTGAAAGTAAATTTAAAAGATAATTTGGCAAAAAGAGAAGGGAAAATGAAGCGGAGGAATAAGAAAGAAAAGAGGAGGAAAGAAAAGGATAATAAAAAAATGAACGAATTAAAGTTAAAAAGAGAATATAAAGAATCATACCTTTTAGATAATAAGTCAGATATGGATGTTATAAGGAATGATAAATTTTCCTATTTTACTTTATATAAAAATAATTTGTTTCCTAATTCTAATAATTAT…	2766	7017	3.24269
PF3D7_0522400	PF3D7_0522400_e3s1	TACGAAATGTTTCTCACAGCTATTGAAAAACTATTCAGCGAAAGCACAAATTCGCTTAAAGAACCATTGAAAATTCATCTGAAAAATAGTCAAAGTAAAATATTACATAAAACTAGGAATGGCAAATATTGCTCATTTAGTGATTATGAAATGAATGAAAGAATAAAAGTAGGATCCTTAAGAAAGAAAAAAAGAAAGAAAGAAATAGATATAATGAAGAAAAAAGAAAAGATAAAAAATATATATAAAAAAGGTTATTCAGATGGAAGTTCATTTAAAAAAGAAGAACGCTACTATTTTGATATTCCAAAAAACAATACAGGATTCAGAATAACTCCAAAAGAAGGAATAGAATTACATGTTATATTTAAGAAACACGATATAAAAGCTTTAAATGAA…	2802	6643.5	3.16431
PF3D7_1122600	PF3D7_1122600-S1_C	ATGCTCGAGATGGAGAGCTGCCGCATGTACGGACTGGAATTTAATAGCTTTATTGAGTTCGACAACTACGAGGGCGGCGTGAAGCTGACCAAGCGCCTGCACATTAAGAACACGACGAAGAACATCATCCGCTTCCGTTTCCTGTTCCAGAGCTCTACCTACTTCACCTACCCCGTACAGGAGATCGAGAACATCAGCCCGGGTCTCAACAAGTCGTACCTCATTTCGTTCCTTAACCCATTAAACGACTTGCAGACCATTTGTGAGATTCTGAACATCCTGATCGATGATAAGACGAAGGACAAGAAGATCTCAATTCAATTGAAGGCGACGCCGCTGAAGTGCGACATCATCATCCCGTCTGTGCTGAACCTGAACGAAATGGTTATCAAGCAGAAG…	1583	5443	2.87129
PF3D7_1038400	PF3D7_1038400_e5s1	GAAATAGTTGAAGAAGTGGTAACAGAAGAATTGATTGAAGAAATGATACCTGAAGAGGTTGTTGAAGAGGTTATACCTGAAGAATTAGTTGAAGAAGTTGTACCAGTAGAACTAATAGAAGAAGTTGTACCAGTAGAACTATTAGAAGAAGTTATACCTGAAGAATTAGTTGAAGAAGTTGTACCAGTAGAACTAATAGAAGAAGTTGTACCAGTAGAACTATTAGAAGAAGTTATACCTGAAGAAGTTGTTGAAGAAGTAATACCAGAAGTTGTTAAAGAGGTTGTACCAGAAGTTGTTGAAGAGGTTGTACCAGAAGTTGTTGAAGAGGTTGTACCAGAAGTTGTTGAAGAGGTTGTACCAGAAGTTGTTGAGGAGGTTGTACCAGAAGAATTGATT…	2343	4433	2.57022
PF3D7_1247800	PF3D7_1247800_e6s1	AGGGATATCTATGGGCGCTCAGGTGAGCGAAAGTATGGATGCAGAAAAAGAGATATTTTGAATTTAAAGATACGACTAACATTACCAAAACAATTTAGTTGGGGAGACCCCTTTAACGATGAAAATTTTGAAGAAAACGTAGATGACCAAAAAGATTGTGGTAGTTGTTATTCTATATCTAGTGTGTATAGTTTAGAAAGAAGGTTCGAAATATTATTTTGGAAGAAATATAAGAAAAAAGTAAATATGCCTAGATTGTCTCATCAATCAATATTAAGTTGTTCTCCATATAATCAAGGATGTGATGGAGGGTACCCATTTTTAGTTGGAAAACATATGTATGAATATGGTATAATACCTGAACAGTACATGCATTATGAAAATAATGATTACAATAAC…	972	4336	2.54773
PF3D7_0612100	PF3D7_0612100	ATGGCTGAGGTGAGCCCCGTTGAAGAAAATGTAATTGAGGAGATAGTAAGTTTTGAAGAAGAAGTTGAAACATTTTTAATAAATTTACACGATTTCGTTTATCATCGAAATGCTGAAGCTATAAAGAAATTGTTTGACACTGATTTTTATACAATATCTGAAATATATTTTAAGAATATAAGATGGCCTTCAATAAAATTGGTTGATATATTTTATAAACAGAAAAATAGATTTCATAATTTGATTCATTCATTATATGAGGAGTTATATTATCGTCATGTATTTATAATAAAAGATATAACTTTAGAAGATCGAAAGAATTCTTGGGATAATTATAAATGTTTATTAAATTTTATAACGACTATATGTACTGATTTATCAGGTGATTCGAACGATAAT…	1968	4647.5	2.52641
PF3D7_0922100	PF3D7_0922100_e1s2	ATTGTGGATATGTCGAATTTAATAAAAAATTCGAATGAATGTTATTCTGGAGGTATAGAGGATAGCTATTTTTCAAAAAATAATTATGCTAATATCGTACCATTTAATGATATAGAAAGAAATAACCAATTGATTAGAAACGATTCATTAAGAAGAAATTCAAGAATTGTTTTTAATGATGAAAATATAGAAGATGGAGATTATTTATCATCAGAAAACTCAGTGTCTGCAAATATGAGATCTATACAAATGACTAGTAATAATAGAAGAAATAGTGCTATAAGAAGAAGTCATATGAAATGTTTAAATGATGTTAATGATTCTGAATATAACAATGTTGAAATAAATATTCCTTGGAGAGTTATAGAACAATTATTATTATTATTAGAAGAAGAAACA…	2148	4495.5	2.50862
PF3D7_1121800	PF3D7_1121800_s3	TTTCTTTCTGATTACACTACTTGTTCAGTGAATGCGAATATTATGCATGATGCAATATCATATACATTAAGCATAGAATCAAATGGTTATTTTTTTGAAGAGTTTTTTAACAAGATACAGGAATTGTTATCATTAAAAGAAATTCCTTCTCGTGATGAATATAATGAAGCTTATGATGAACTAAATATAATTATACAAACAGATACAACCTCTGGAGTAGATAAGTCTTTAAAAATTATGTATTCGTTATTTAACAAATATACTCCAACTAATAAAGAAATGTATGATATTTTGAATGCATATTTTTTTTATCCATCATATAATGCTTATAGAACATATGTAAATGAATATTTTCTTAGAAATTATGTTGTCATTTTTATATATGGAAATATTATCATA…	2052	4206	2.4124
PF3D7_0905300	PF3D7_0905300_s6	GTTAAGAAATATGATGAAATAAAATGTTTAAAAGAAAGTGTGGATATTGGTTTGAAAAAATTAAACGAGGCAGCTATGGACGTACAGAAAATGAGAGAAAGTTTAACATCGGAAGAAGAGAAATTAAAAGAATCCGATGAACAAATGAATATATTATTAGAAAAGGTAAAGGATGAATCACTCAAAGCGGAAAAACAAAGTGTAGAAGTTTCTAAATTTAGAGATAAATGTATTAAGGAAAAAGATTTAATTTTAAAAGATCAAGAAGAAGCAGATAAAGATTTAAAAGCAGCTTTGCCATATTTACATGAGGCAGAAGAAGCTATTAAAAGTATAACAGGAAAAGATATCACTGAGTTGAAAAGTATGAAAACGCCATCTGATATTATTAGAATAGTT…	2670	3920	2.40264
PF3D7_0806800	PF3D7_0806800_e1s2	AATAATAATGAAATGGTTACTATGTTATTTGATGGTCGTTATATGTTATTATTAATGGGTTTCTTTGCGGTATATGCTGGATTTTTGTATAATGATTTTTTTTCGATGCCTTTAAATTTATTTTCTTCTATGTTTATGTTAGATAAACAAGTAGATAATATGGAATATTATAAAAGACGAGAGATAACGGATTCAGCAACAGGTGAAGTTCAGTATGCATATCCTTATATTTTTGGTTTTGATTGTAAATGGTTAGGAGCAGAAAATGAATTAACATATATTAATTCTTTTAAGATGAAATTCTCCATAATAATAGGTTTTATACACATGACCTTTGGTGTGCTTATGAAAGGATTTAATGCTTTACATTTTAAAAGAAAAATGGATTTTTTTTTTGAA…	1602	3594.5	2.15772
PF3D7_1250100	PF3D7_1250100_e1s2	CCTTTGAATCATGAAGAAGATAATTTTCCTTTGAATCATGAAGAAGAAAATGTTCCTTTGAATCATGAAGAAGAAAATGTTCCTCTGAATCATGAAGAAGAAAATGTTCCTCTGAATCATGAAGAAGAAAATTATAATTCATTTTTATCTTACCAAAAATATGATGAAAGGGATATATCACCTCATAATGTGAATCAACACAAAAAAGAAATATTTCACCATAGGAATATTACACCATATCATGTGAATCATCACAACCAACATATGGACCAACATGATCACCATATAGATCATCACAATCACCATATAGATCATCACAATCACCATATAGATCATCACAATCACCATATAGATCATCACAATCACCATATAGATCATCAAGACCACCATATAGATCAT…	2382	3494	2.14556
PF3D7_0608600	PF3D7_0608600	ATGGAAGACTCATCCGAGCTGAATAAGAGTATCGAGGGGAACGAGGACTTAGAAAGTGAGGTGAATGAGGAGAACCAGAACGAGGAGAACGAGTCAGAGGAGAACGAGTCGGTCGAGAATGAGTCGGTTGAGAACGAGTCCGAGGAGAACGTTAACGAGGAGAACGTGAACGAGGAGAACAAGAACGAGGAGAACAAGAACAAGGATAATATGAACATGTACCAGGAGAACGGAAACAACAACAACAACAACAACAACAAGAACGACAAGCTGAAGAACAGCTTCCACTCGAACATGAACGAGCTCAAGAACAACCTTAACTACAACAACCTGAACAACATCAACAACATCAACAACATGAACAACAACTTGGGCACCAAGAACTTGGAAGAGAATGAG…	849	2774.5	1.90438
PF3D7_0930300	PF3D7_0930300_s1	ATGAAGATCATATTCTTTTTATGTTCATTTCTTTTTTTTATTATAAATACACAATGTGTAACACATGAAAGTTATCAAGAACTTGTCAAAAAACTAGAAGCTTTAGAAGATGCAGTATTGACAGGTTATAGTTTATTTCAAAAGGAAAAAATGGTATTAAATGAAGAAGAAATTACTACAAAAGGTGCAAGTGCTCAAAGTGGTGCAAGTGCTCAAAGTGGTGCAAGTGCTCAAAGTGGTGCAAGTGCTCAAAGTGGTGCAAGTGCTCAAAGTGGTGCAAGTGCTCAAAGTGGTACAAGTGGTCCAAGTGGTCCAAGTGGTACAAGTCCATCATCTCGTTCAAACACTTTACCTCGTTCAAATACTTCATCTGGTGCAAGCCCTCCAGCTGATGCAAGC…	2610	2966	1.90291
PF3D7_1038400	PF3D7_1038400_e6s1	GTTATACCTGAGGAATTGATTGAAGAGTTTGTACCAGAGGAATTAGTTGAAGAAGAAGTACCTGAAGAACTAGTAGAAGAAGTTATACCTGAAGTATTAGTTGAAGAGGTTATACCTGAAGAATTTGTTGAAGAGGTGATACCTGAAGAAATTGTTGAAGAAGTTATACCTGAAGAAATTGTTGAAGAGGTTATACCTGAAGAAGTTGTTGAAGAGGTTGTACCAGAAATTGTTGCAGAGGTTATACCTGAAGAAGTTGTTGAAGAGGTTGTACCAGAAATTGTTGCAGAGGTTATACCTGAAGAAGTTGTTGAAGAGGTTGTACCAGAGGTTGTTGAAGAGGTTGTACCAGAGGTTGTTGAAGAGGTTGTACCAGAGGAATTAGTTGAAGAGGTGATA…	2349	2943	1.89173
PF3D7_0307700	PF3D7_0307700_e3s1	TTGGAAAACAATGAGAGCCTTAATTTTAGTAACTTTAATGAACAGCTAAATCCATCTGTTGATGATACATTAAAAAAGAAAGAGGATTATAATAATGATAATAATAATGTTGATAATATGAATAATAGTAATAATCAGAGTGATAGTATATGTGGAATATACAGATTAAACAGCTCACAATTATTAAACGAGAACCTAGACAATACTCTAAGCAGAATAAGTTATGTAGATGAGGACGTGTCCTCTTTTTTTGATTCAGATAAAGAAGAGGAACTTTATTTTGATAATGACATTTCTACTCTTGGTTCATGTTATTCTATAAATACACCTAATAAAATATATAAAAAGAAAAAAACACGGAATAGTATTAATGGTATACATGCACATGGAAAAGAACAC…	2562	2889.5	1.84888
PF3D7_1215800	PF3D7_1215800	ATGATTAATTTACAAACCTTAGATTTTCATTTAACTAATTTTGAAGAATCGAACAGATGTTTTAACGATGATGAAAAATTCGGGATATTATATGGAATGACAGAATTAGAAGAGCATATAAATAAAGAGATATATTTGTGGGGTAAAATTGAAGGTATAGAATATGATTATTATATTACATATTATTTTAATCAAGAGAATTTTTTCCCAACAAAAAAATTTTATTATTGTACTAATGATTATGTGTTTCATGAGATGTTAAAAGGGAATGATGATTTTATAGAAAATGTTGAGAGGAAATTACCTTTTACATTCTTCAGTGGTTATCCTCAAAGGATTTTTTATTCTAAGGATAAAACGAAAGGACAGAAAAAAAAGGTGACCGGAGGGGATGATAAT…	1098	2871	1.83957
PF3D7_0209000	PF3D7_0209000_s1	ATGAAGAAAATTATAACGCTGAAGAATCTATTCCTCATTATCCTGGTATACATATTTAGCGAGAAAAAAGACCTGCGTTGTAATGTGATAAAGGGAAATAATATTAAGGATGATGAAGATAAGAGATTCCACTTATTTTATTATTCCCACAACCTTTTTAAGACACCCGAAACAAAAGAAAAGAAGAATAAAAAGGAGTGCTTTTATAAAAATGGTGGTATTTATAATTTATCTAAAGAAATAAGGATGAGAAAGGATACATCCGTAAAAATAAAACAAAGAACATGTCCCTTTCATAAAGAAGGAAGTTCATTTGAAATGGGTTCAAAGAATATTACATGTTTTTATCCTATCGTAGGGAAGAAGGAAAGGAAAACACTGGACACAATTATTATAAAA…	2394	2539.5	1.77687
PF3D7_1135600	PF3D7_1135600_e1s1	ATGAAAATGATTTCTGATGAATATATTTTATTCATAAAGGATGGTGATAGTAAAAGGAAACATGACAAATCTATAGATACAAATTATATAAAAAATCGAAAAGTAAGTAGAAAAAGGTTTGATTCTAATGCTTCTTTTAAGTTGTCAGATGAGTATAGTTCATCTATATATTCGGAGACGGAAGATGAGGACAAGAACGAGGACGATGTACATAAAAATGGAATAAGAAATATAACTAATAATCAAAATGGAATCAATGTAAATGATGGCGATGATAATAATAAAAGAAATAATGAAATTAACGAGGAAACAAATGAAATAACTATGAAAGAGAGTACAAAAATTAATAAGGATGATATAATATCATCACAAGGGGAGGAACAAATAAAATCAAACGAG…	2037	2628.5	1.65123
PF3D7_0307900	PF3D7_0307900_e2o3-s2	ATATATGACGAAAGTATAAATAATATTTATGACGAAAGTATAAATAATATTTATGACGAAAATATAAATAATATTTATGACGAAAATATAAATAATATTTATGACGAAAATATAAATAATATTTATGACGAAGGTATAAACAAAATATGTGACGATAATATCCTTGAAAATAAAAACATAAAAACAACAAATGACATTGTACAAGTTGAAGAGAATAACGAATCAATAGAAAAAAACGAACTAATGATTTCCCTAAATAAAGATATAAACAACACATATAATATGTTCAAAGAAAATGTAGATATTTTTATTAATAAAATTAAAAGAGAAAGTCTTTTAAAAATAGATAAAAATATAAAAGATAATAATAATGATGATGAATATATAATGGACAACTTT…	1500	2188	1.56203
PF3D7_1036400	PF3D7_1036400_e2s2	AGCGATCTAGAACAAGAGAAACTAGCTAAAGAAAAGTTACAGGGGCAACAAAGCGATCTAGAACAAGAGAGACTAGCTAAAGAAAAGTTACAGGGGCAACAAAGCGATCTAGAACAAGAGAGACTAGCTAAAGAAAAGTTACAGGGGCAACAAAGCGATCTAGAACAAGAGAGACTAGCTAAAGAAAAGTTACAGGGGCAACAAAGCGATTTAGAACAAGAGAGACTTGCTAAAGAAAAGTTGCAAGAGCGACAAAGCGATTTAGAACAAGAGAGACTTGCTAAAGAAAAGTTGCAAGAACAACAAAGCGATTTAGAACAAGAGAGACTAGCTAAAGAAAAGTTGCAAGAACAACAAAGCGATTTAGAACAAGACAGACTTGCTAAAGAAAAGTTGCAA…	1569	2236	1.50715
PF3D7_1360500	PF3D7_1360500_e9	CAAATTTGTGAGGATGATGAACTCAGTTACAACTGTTACGAAATTAAAGAAGATTCACAAAAGGAAAATATCCAATCCGTTAAGATTGAAGACTTTATTTTAGGGTTATGTGGATGTAATAGGATAATTATATATAATGAGAAGAGCCTAGATATAAGTATGAATGAATACAAGAGTGATAATTTTATGGAAACATATAGTAAGTTTGAAACGGAGAATGAAGAATATCATGAAAATGATCATGATGAATATCATAATATGGAACATTCAGATGATGAAAACATCAATAGCATTGAATATGAAGATATATGTTTATATAATATTATAAGGAATACCGGATTTTCTATTTATTGTTATAAGAATACTTTATTTCTTTATAATTTAATGAAGGAATGTAAA…	1077	2054	1.46454
PF3D7_1222700	PF3D7_1222700	ATGGGAAATAAATGTTCAAGAAGCAAAGTAAAGGAACCCAAACGTAAAGATATTGATGAATTAGCTGAACGTGAAAATTTAAAAAAACAATCTGAAGAAATAATTGAAGAAAAACCAGAAGAAGTTGTTGAGCAAGTAGAAGAAACACATGAAGAACCTCTTGAACAAGAACAGGAACTGGATGAACAGAAAATAGAAGAAGAAGAAGAAGAACCTGAACAAGTACCAAAAGAAGAAATAGATTATGCAACTCAAGAAAATAAATCATTTGAAGAAAAACATTTAGAAGATTTAGAAAGATCTAATTCAGATATTTATTCAGAATCTCAAAAATTTGATAATGCTAGTGATAAATTAGAAACAGGAACTCAATTAACCTTATCTACTGAAGCCACTGGT…	612	1871.5	1.33407
PF3D7_0220000	PF3D7_0220000_e2s2	TCAGAAGAAAAGGTTGATTTGAATGAAAATGTGGTTAGTTCGATTTTAGATAATATAGAAAATATGAAAGAAGGTTTATTAAATAAATTAGAAAATATTTCAAGTACTGAAGGTGTTCAAGAAACTGTAACTGAACATGTAGAACAAAATGTATATGTGGATGTTGATGTTCCTGCTATGAAAGATCAATTTTTAGGAATATTAAATGAGGCAGGAGGGTTGAAAGAAATGTTTTTTAATTTGGAAGATGTATTTAAAAGTGAAAGTGATGTAATTACTGTAGAAGAAATTAAGGATGAACCGGTTCAAAAAGAGGTAGAAAAAGAAACTGTTAGTATTATTGAAGAAATGGAAGAAAATATTGTAGATGTATTAGAGGAAGAAAAAGAAGATTTAACA…	2262	1778.5	1.26274
PF3D7_0307900	PF3D7_0307900_e3o3-s1	ATTCATAGTGGTAAACATTTTAATCCACAAAAAATTTATCGACGTCTACTTTCAAAATTTAATGATAAACAAATAGATTCTTCCAACAATGTAAAGGAAGAAGTCGAAGAAAAACATAGTGAGCTTTTTGCATGGGATAAAAATGAAGAAAAGTATAAAAATGTAAAAGAAAATCAAGAGGAAAATGATCACAAAAGTGTATGTTCTGATGAATATTATTTGAGTATTAGTAGTGAAGGGAAATATAATTATGATGGAGAAGATGAACAAGATGAACAAGATGAACAAGATGAACAAGATGAACAAGATGAACAAGAAGAAGAAGATGAACAAGAAGAAGAAGATGAACAAGAAGAAGAAGATGAACAAGAAGAAGAAGATGACGAAGATGATGAAGAT…	1500	1778.5	1.16376
PF3D7_1444100	PF3D7_1444100_e7s1	GGTATAGGATCACCAATATTTATCCATGAGGAAGTCATTAATTTTGATATAGTTAACACGAGCAAAAAATATTTCCACGAACTAATCATTTTTAATAAAGGTATGAACGAAAGAAATATATATTTTGTATTTGAATCAGAAAAAAATAGAAAGAGAAAAAGTGAACAAGTACAAATATTTAACATCACACCAAAAAATTTGTCAATTAAAGGAGGAAGTAATATTGTGTGTATTTTAAATTGTTTTAATATTAAGGAAGAAAAATGTGAAGATATACTTTATATATATGATGATATTGCAAAAAACAAAAAAAAAGCATTACATAATTATAAAAAAATAAATATCGTAGCTACATTTGTTCATCCGGAGGTTGAGTTAAGTGAAGTGGAAAATTTTGTT…	2325	1784	1.14873
PF3D7_0310300	PF3D7_0310300_e1s1	ATGCAAAATAATAAAAGAATGGATAATTATAATTGTAGAAGTTTTAAAAAGGAAGAATATTATAAAAATTATTACTATAACCAGGATCATTATATGAACAATAACAATAATAATTTATACAATAAATATAATTCATATGATGAGGAATATACATATAACAAAAGTAGTAATAAAAAGAATTTATTATTTAATTATTATAACAAAGAAAGTATTGGACATAAAAAAAAAAAAGCGAGTTTTGTAAAAGCACAATATGCTAATAATAGGATACCATCTAATAATACAAAATTAAATAATATGCGTGACAAAATTAATTATAATAAAATGGATTATGATTATATTTTAACAAAAAAGAAAAAAAAAAGAACAAGCATTGAAAAAAATAATAAACATAATGAC…	1749	1654	1.07135
PF3D7_1121700	PF3D7_1121700_e1s1	ATGATGGAAGAACTTTTTAAAATTTTGTTTGAACTGGTAAAAATAGGTGATGAAGAAATTCAAAATTATTTAAAAGAAAGAATAATTGATGAGAAATATGAAATAGAAAAAAATGGTGTAGATTATTTTTATGATTTGGTTTGTTCTTATGCTGATGATAAAATAAAGAGAAGTAAAATTGCAAATATTTTTAATAAACATTTTAAAAATGATAATATACAAAATGGAAGTAATCCAAATAATATCCCTAATCAACATGTTTTAAGTATACAAAATAACAAAAATCTTGAGAAACTAGAAGAAGTCTTTAATTTTAAAGAATATTGGAAAGATAAAGATATGTCAAATTATAGTGATCCCTTTTTAGGTGTATATGAAAAACAAATAAATTATAATACT…	2445	1640	1.03063
PF3D7_0303700	PF3D7_0303700_e1s1	ATGTTTGTGAAGAATGTACTAAACGTGCTTAGGAGAATCGAGGGAAAATCATTTAAAGGGCGCCATTACCTGAACACGAGTGCAATACATTTTAAGATTGTGAAATGCAAATTATTTGATATAGGGGAAGGGATATCAGAAGTGGAAATTACCAAGTGGCATAAAAATGAAGGTGATCAAGTAAGTGAAATGGAGAGTTTGTTGACTGTACAAAGTGACAAAGCTGCTGTAGATATAACTAGTAAATATAATGGTGTATTGGTAAAAAAATATTTAAATGAAAATGATATGTTAAAAGTTGGATCATATTTCTGTGAGATAGATACAGATGATGATATTATTGAAAGAGATGAAGAAGAAGTAGAAAAGGAGGAAAATAATAAAAAAGAAGAAGATGGT…	1344	1642	1.02703
PF3D7_1337500	PF3D7_1337500_e1s1	ATGAAACCAAATGATAATTTAGAAAATAACATGAATTTGAGTATAGGAAAAATAGATTTGAGTAATATTTATATGGACATATTACACATACATGAAACTCTTGTAAATCATATTCAAACCATCGTTACACAAGTTTATAGTTTGATAGAAAAGACATTATGTGATCACATCGAAAGAAATAAATTGGACATATATATGTTTGAAGAAAAGTATAAAGATAATAATATAATAGATGGGGATAAAGATAAAATGATAATCCATTCTTTAAATAATTTGAATAATAATTATTTTGGTAACGATATAAAAAATAAATTTATTTTAGAGAAGGTAAATGAATGTATATTAGATAATGAGAATGATAAAAAAAATAAGATAAAAATAAGTTCTAAGAAGAAATAT…	2484	1400	0.917834
PF3D7_1033800	PF3D7_1033800	ATGAACAAAAATATCATCCAGATATATTTGTTCGTGTTCATATTGCTACTGAAGCAGCACATCGTCATCTTAAAAAACGAAGAGTTCACGAACCCCTATAGCATTCGCAAGAAAGACATCAAAGCGATCGTCAACGTGAATAACAAGCTCAAGTCGATTAATATTCACAAGCTGGATAACATTAACAAGAAGGACCTGCTCGGGTCGTATAACGAGAATTATATTCTGATCAAGCTAAAGAAACAGGACATATTCAGCAAAAAGCTATCGACGTACTACGGCGAAGTGCAGATCGGTGAGCAGTCGGAGAACAATATGAACGTTCTGTTCGACACCGGATCGTCCCAGGTGTGGATCTTGAACGACACCTGCAAGAACTCCCTCTGTAATAACATCCAC…	1350	1498	0.898213
PF3D7_1430800	PF3D7_1430800	ATGGCAGAAAGCAGTTATAGGGATACACAATTATTCAAACCCAATGGTGTGAATATATTTGATAGTAATCTTGGTATGAACAACAAAATAAGTGAGAATATAAGCGCAGAAGAATTATTCCAGTCAAAAAATATATACCGAGATGTGAAATCTAAGGTAATTCCTGGTCCTATAAAAACAACTACTGTTGAGAAAGTAACAAAAATACCTAAGATAATATTTCGTGAGAGACAAAAAGATATAGTAAAGAAAGAGAAAAAAATTATTCATAAAGAAGTTGAAATAGAAAAAATTGTTGAAGTTATTGAAAATAAAGATGAAATTGTATATAATGAAGTGAAGGTACCAAAATATATAGATGTTCCAATTCTTCAACCAAGACAAGAAGTTCATTATCAA…	795	1460.5	0.883396
PF3D7_1332000	PF3D7_1332000_C	ATGCTCGAGATGCCGTACGTGGACAAGACCGAGGAGTTCTTTAAGATTATCGAGAAGCTGAGCAACGACAACATCAACATTCGTAAGAACCGCTCAATTGTGCAGGATACACAGGTGGGAGAATTAGCGTCCAAGATCACTGATCTGCTGCAGAGCGGCTACCAGAAACTGCAGCAACTGGAGCGCTGCGTAAAACAGAAGGGCATCTTCAATGATAAGACTAGTGAGATTGAGGAACTCACCTATGAGGTAAAGCAGACTATCACGGACGTCACCAACGAGCTGGACCTGCTTGTGCAGTACTCGTGTAATTTGAATATCTCCAACCCGCAGTCTAAGACCCACATCGACAACATCATCAGCAGCCTGAAGAACCGCCTGTTTGACTTCACGAAGAAG…	926	1389.5	0.821184
PF3D7_1250100	PF3D7_1250100_e1s3	ACGTTATCTACAAATATACAAAATGGAGAAGGTGATCATATTAATAATAATAATAATAATAATAATGTTAGGAACAATTTGAAAAAACAAGTTTTAAAAGATCTAGATCTCGAAATAAGCAAACTAAAAGGTCATATATTAGAAGTAGATATAAAAAAAAATATTGCACTAGAACAAATAAATTATCTAACAAACAATACTAATGAAACCGTACCAGATGTTATTAGGGATCTTATGCCTGCTCCTAGAATAGTTCCAGTATCTGAAGATATATATGATTACATAACATGGGTAAGAGATAATACAGCTGTAATAAATAATACCTTAAGACATTTTGTTATGACTTTTGATCAAAAAATATATGACTATGATGATCATTTAATTTTTGTTTATAATATT…	2382	1283.5	0.792546
PF3D7_1409800	PF3D7_1409800_e1s1	ATGAGTTATTTGAGCAACATGAGCAATATGAATAATATGAATAACAGCACACAACAATATAACAACGAGAACAGCGAGAGTCCTTATGGAGAGGCAAGAATGAGTGAGCAATGTTCATATCAAATGAATAGTCCATATAACCCAGCACCATCGATACCTATTAAATTGTTTGTAAGTTCAATACCTAAAAATTTAACAGAAGAAGATATAAAATCAATTTTTCAGGAATATGGAAATATACAGGATGTTGTATTCATAAAGGATAAGAAGCCTAATGTGAATAGGTCAAATGTGTTTGTTCGTATGGAATCAATATTTTATGGACAAAAGGCTATAAAGGATTTACATGGAAAGAGAACTTTATGTGAAACCTTAGGGCCATTGATTGTTAAGTTTGCT…	1542	1348.5	0.763943
PF3D7_0917900	PF3D7_0917900_e2	ATTGAGGGACCCGTTATTGGTATTGACTTGGGTACCACTTATAGTTGCGTTGGTGTTTTTAAAAATGGAAGAGTTGAAATATTGAACAATGAATTAGGTAATCGTATTACCCCATCATATGTTTCTTTTGTAGATGGAGAAAGGAAAGTTGGTGAGGCAGCTAAATTAGAAGCCACGTTACATCCTACTCAAACAGTTTTTGATGTAAAGAGATTAATAGGAAGAAAATTTGATGACCAAGAAGTTGTTAAAGATCGTTCTTTATTACCATATGAAATTGTAAATAATCAAGGCAAACCAAATATTAAGGTACAAATAAAGGATAAAGATACTACATTTGCTCCTGAACAAATTAGTGCTATGGTTTTAGAAAAAATGAAAGAAATAGCTCAATCATTT…	1881	1242	0.744952
PF3D7_1108500	PF3D7_1108500_e2	GAAAGATATTTCTCAGCAACCAGTAAAGTGTTCATAGATAAAAATACAACAGTAATATGTCAAGGAATTACTGGAAAACAGGTAAGACAAATATATATATATATATATGAAGTATATATGTTTTTTTTTTTTTTTTTTTTTTTTTTTTTTTTTATGACTTGTTCATATTTTCTTTTTTTTTTTCTTATTGTTCATATATTTTTTTTTTTTTTTTTATCTTATTGTTCATATATTTTTTTTTTTTTTTCTTATTGTACATATTTTTTTTCTTTTTTTCCGTACTGTTCATATTTTTTTTCTTTTTTTCCGTACTGTTCATATTTTTTTTCTTTTATTACTTCATATTTTATTTCTGTCCAGGGTACTTTCCATACAACCGAAGCCTTAAAGTATGGAACA…	1218	1257	0.674472
PF3D7_0606800	PF3D7_0606800	ATGATGCATATTTTTTGCAAGTTGTTTTTATTTTTTTCCTTTGTGTATATTTCAAATATAAAGTGTGTGGAAGAAGTAGTAAATAATAAGAGCAAGCGATTAATAGATATATACCATGCTGCCGTTAAAGAATTGATACAAAATGAGGAGTTAATAGATTTAATAGATAAGCATAATGTAGACTATTCTGTAATAGAATCTATAGAAAACCTACCAAATCTTTCAGACATAAATGTAAAAGATGATATTGATGATGTATTAAGTGAAATAATAAAAAAGAAGGAAGTGAAAATAGGTGCTTTAAAAAATAAGAATTGGGGTATTATAGGGAATTATGAACAAAATCCTCCTGTTGGTTTTTGGCCTGATGTTATGTATATTATATGGGAAACTATATCA…	897	1249	0.638492
PF3D7_1474000	PF3D7_1474000-S3	CTCAACATGTTCTTAGACTGCCTGGAAGACGAGCCCGCCGACGACGTGGAGCTGTTCCTGAGTGTGATGGGGAACATGAACGAGCTCGAAAAGAAGGCCCATGAAGAGAACAAAGACATCATCGAGGAGTACTTCAACGCCCTGCATAAGAACAACGACACCACGGACGTGGTGATGAACACCGAGGAGAACATTGCGGACGCCTACATGGTGGACCCGAACAACGCACCAATTAACAAGGGAGCTAAGCATAAACTCTGCTTCGACGAGTACGACAAAGAGATCATGCTGCCGTACAAGACCTCGAAGACGAACCTGACTCTGCCGAAAGAGACCGACACCAGCGACATCACCGACTTCTCGTCGCAGATCACGCAGTCTACTATCCAGGACAACCCG…	1749	1137.5	0.617525
PF3D7_0829600	PF3D7_0829600_e2	ATATATGAATATTATCAATACATAAATATATATATGTATCATAATATTATATATATATATATATATTTTATTATTATTATTTATTTTATTTATTTTTATTATTTTTTTAAAATGAAAGTTTTTATTTTTTTCGCTTTTGTTAATTTTTTGTTTGTTTTGAATTTATTTTCCCCTTGTACGTGTAAAAAGGATTATGGGAAGGAATGGGTTAAGGATAAATTAAGTTTAGTAAATTTAAAATTAGAGAAATATGATAAAAAAAAGAAATTTGCTCTTATATCAGGAGCAGCTATAGGAGCCTTAGCATTAATAACACTTATAGGAGGTATTTATATGACTAAAGGAAGAAAAAGTTCCATATGGCATAATTCAGAAATAAATGATACACTTTATGATGTT…	621	1135	0.614944
PF3D7_1435300	PF3D7_1435300_e1s4	AATGAAAATAAGCAAAATGCAGAAGTGCCTAATTCCTATGATTTTTCTGGGTATACATTGGGTGCAAGAAGAAAAACGGCTGATATGGTAAATATTCAAAAGGATGATGAAAATGACATACGTATTGCAAATAATACGAAAAGTATAAGTAATACAAATGATATGAACAATGTAAGCAATATGAACAATATGAACAATGTAAACAATGTAAACAATGTAAACAATGTAAACAATGTAAGCAATATGAACAATATGAACAATATGAACAATATGAACAATATAAACAATATGAACAATATAAACAATATGAATAATATAAATAAAGATGATAATAATAATATTAATGGTGATGATACAAACAACACCGTCATTTCTGAAGTTACCAATACTACGTATGCT…	2361	1220	0.602948
PF3D7_0804500	PF3D7_0804500_e1s2	CATAATTTTAATAATATTAAAAAAAACAACAATATGTTCAAATACAAACATATGCAATATGACTTACAATTTAATATATATCATAATATTTTAGTTATACTCAACAAAATTAATAATAAAATGTACCTCTACGATGTTGTAGGGTCATTAAAGAAAAAAAATATAAATAACAACAATAAGAAGAACAAGAAAAAAAAGAAAAATTATTATTCATTTAATCAAGACACAAATATACATACACAACCTTTGGAAAATTCAAATACTTATGAAAATAATATGAATAAAAATAATATCTATGAATATCATATGAATAGTGACATCAACTCTAATCATGTTAATGCTAATCATCTATTAAATAAAAATGTAACTCAAAATATACAATCAACACAGCTATCTAGT…	2748	1125	0.601407
PF3D7_0418000	PF3D7_0418000-S10_C	ATGCTCGAGATTATTTACGAGTACAGCCTCGTCTTCAACAAGACTAATCAGCAGAAGAACCAGATTAAGTCGAACACCCTGAACCACTTCGTGCTGAGCGACCTGTACAAGAATGAGAGCCTTACCCACGAGTACCAGACAACTGAGAACGAAGAGAACGAGAACGACGTCGAAGAGTGCCAGGTTAACATCCACGAAAGTAACGAGAATGAGAACGATATGTGTGAGTCTGGAGAGAACGAGAACGATATGTGTGAATCTGGCGAGAACGAGAACAACATCTGCGAATCCGGCGAAAACGAGAACAACATCTGCGAAACGGCGGAGAACGAGAGCATCTCGATGTATGAATCCGGCGATAAGTACACGACGGACAGCCAGAAATCCGACACCGCCAAC…	1715	1185	0.577152
PF3D7_1352500	PF3D7_1352500_e2	GGATCTTGGTTTATCAAATTTTATGCCCCCTGGTGCTCACACTGTAAAGCAATGAGCAAAACATGGGCACAACTAGCCACTGAATTAAAAGGAAAAATAAATGTAGCTAAAATTGATGTGACCTTAAATTCTAAAACAAGAAAAAGATTTAAAATAGAAGGTTTCCCAACACTTTTATATTTTAAAAATGGAAAGATGTATGATTATAAAAATCACGATAGGTCCTTAGAAGCTTTTAAAAATTTCGTCTTAGAAACATACAAAAATGCCAAAGCATCTGAACCACCTAAACCACTTAACTATATGGATATTCTTAAAGATTTTTTGAATGAAACTTTTCAAAATATAGATAGAATTTATAAATACGCTTTCCCATCCTTAGCTGTTCTTGTATCCGTA…	489	1175.5	0.549172
PF3D7_1206100	PF3D7_1206100_C	ATGCTCGAGATGAAGAACTTAGATATTAACACGTTTGATAACATCGAGGACATCCCACTGGGAAGCAGCGAGCAAGATCCCTATGACTTCTTCACCCTGAGCGACCGTAACGTAATGAACTCGGACATGAAGAAGAACATCGTGCAGTGGAACAGCCGTTACTCCTATAACCAGCTGAAGAATAAGGATTCGCTGATTATGTTCTTAGTGGAGATCTTCCGTTCGCTGTTCGTGAGCAACTGCATCGATAAGAACATCGACAACGTACTGCTGTCTATCGAGGAGATGTTCATCGACCACTACTACAACCCCCAGCACAGCCGCTTGAAGTACTTAATTGACGACGTGGGCATTTTCTTCACGAAGCTGCCGATTACCAAAGCGTTCCATACGTACAAC…	1415	1069.5	0.528179
PF3D7_1311100	PF3D7_1311100_e1s1	ATGAGAAAACACAATGAACGTTCTATTAATTCCAGGATACAGAAGGAACAAAAGAACGAATATGCTCGAGAACGAATTAGAAACGAACTAAAATTAGATAACTATAGTAGGATACAGAACGTGTCAGATGAAAAGGCAGACATTATTAAAAACAAAAGAGAAGAAGAAAAAGAAAAAGCAAATATTAAGAGGGAATATGTTGATGAGGAACAAAATATGTTTAATATGAATGTACCTGGTGATAATATGTCTAGAGACGAATTTGATGATAAAAGAAAATTAAAAGAAGAGAAAATTAAACAATGCCAACTATTAAATGAAAAACAACTAGAAGAAAAAGAAAAAGAAAAAAGAATTCTGAGAGAAAAAGCTGTTGAATATACCTTACAAAATGAAGAA…	1485	1147.5	0.512295
PF3D7_1102600	PF3D7_1102600-e2o2	AAAACAGCAGAATATTTGAATAGAAGAAATATTCATAATGGAGAAATAGAAATAGGTATACGTAGATTATTATGCGAAGTGGAAACTTTAGTTGATTATAATAATACACCCGTTTATGAAGAATTATCAGAATATATTGATTCGGATGAAGAAGAAAATGAAAATGATGATGCACCACTTTTTGATGATTACTATATGAATCATTTTAAGAATATTCATTATAATCCTGGTAATATTCATAAAAAGAAAAATTGTTTTCTTAAATTACATACAAGTCTTGATAGAAGAATTGAATTAGAAATTGTGAATCTAATGAAAACTAAAAATGAAAGTAACTACTTTATGTTAAAAACAGAACCTAAAATGAGAAAAATTAAAAGATATTTAGATAGGTATAAA…	606	1043.5	0.490058
PF3D7_1426500	PF3D7_1426500_e1s1	ATGGATTTGAAAGGGTGGATTTCCAAAAAAAGCTCTAACGTGTCATACGAGAAAATAAAATATGAATTTTCAAATGTAAAATATTCAGTAGATCATGGTAGGTTAGAAATATTACACGGCATAAAAGGTATATTGCTACCAAAAACGATTACAGTTATAATGGGTCCAAGTGGGAGTGGAAAAACAACATTGTTGAATATATTATCTATGAAGGTAACCGAAGGTGTAGAAGGAGATTTTTTAATAAATGATATGAGTAGAATGAAAAATATAAAAAGACATATGGGTTATGTATTACAAGATGATTATTTTTTTTCAAGATTAACTGTATATGAAACTATTGAATTTACTGCCAAATTAAAATTAGATATTAGGGATAAAAAAAAATTAAATGAATTA…	1980	1102.5	0.484756
PF3D7_0730900	PF3D7_0730900_e2s3	ATAGATAGAACCAAAATCAATACTCGTAGAGCAAGTGTTAGTGAAATTAATGAGAATGTAGAGGAAACCAAAAAAGATATTCCACAAAATAAAAATTATAAGCATCTTACTGATGAAGAAAATAAAGTAGAAAAAGAAATGAGTATTCACGATGGAATGAAGGGACAAAAATATGGTTCTAAAAATGTAAGATCATTTTCATCACAAGGAATAAGAGAAGATTTTCCTTATAAAAATGAAAATAATCATAAAATGCATAATGTTAATGAAAAAGAAGAAGTTCCCAAAATAGATAGAACCAAAATCAATACTCGTAGAGCAAGTGTTAGTGAAATTAATGAGAATGTAGAGGAAACCAAAAAAGATATTCCACAAAATAAAAATTATAAACATCTTACT…	2076	1036	0.483016
PF3D7_1245600	PF3D7_1245600_e1s1	ATGGTAAATAAGAACGTTAAAGGTTACAACCCTAATCAAAACAGGGGAACAAGTAAAGGAAGAAATATTAGCAAGAATAATAAAATTATTAAAAATAAAGAAGGAGGTAAAAATTTATATACTTGGTATATAGATAATAAAATTGATGAAAAAAAAAAAAAAAATGAAGATATAGAAAATAACAAAGCTAAATATTTTGAAGATGTTGCTATAAATAAGAATGTAGAAGAATATATTAATGTGATATGTAGAATAAAAAATAATAAAATTGATATAAATAATAAAATTGATACAAATAATAAACTTGATACAAATAATAAACTTGATACAAATAATAATATAAATAATAACAATGTTGATGTTATAAAAAAGATTTCTTATAATAAATTAGTTATAGAT…	2439	1095.5	0.478459
PF3D7_1122900	PF3D7_1122900_e2s2	AATAAAAATTTAGATAATGAACACCAAGAAGGAAAACAAGAATATAACAACAAAAATAACGATAATGATAATAATAATAATAATAATAATAATAATATATTAAATAATGAATTATCAAAATATACGTGCCTTACACATTTTAAAGACTTATATATTAAAATAAAAATTATGGACTGTTCATTTAATTATTCTTATGATTATATAGGAAATTATCAAAGGTTAGTTATTACTCCTTTAACAAGTCGTATTTATATTACAGCTACACAAGCATTAAGCTTATATATGGGATGTGCTCCTGCAGGACCAGCAGGAACAGGGAAAACTGAAACTACAAAAGATTTATCTAGCTTTTTTGGAAAAAACTGTTATGTATTTAATTGTTCAGATCAATTAGATTAT…	2619	1113	0.473174
PF3D7_1207700	PF3D7_1207700	ATGTTGTTACGACATAATTCCTTCTGCATTTGTATCATTTTGGTGTTGTGTTCTGTTCAAAGATGTTTATCTGATGAACAAAATATAAATGATTGGCCTATAGACTTTGAATATAATTCTAAGTCTTTACCATCAATAGAAGTTAAATTAAGTCCTCCAGAAAATCCGTTACCACAAGTTTCTGCAGAAATTAAAATTTTGGAATCTGCAAGACTTAAATTGGAAGAGGGAATGATGCAAAAACTCGAAGATGAATATAATAAATCCTTGTCCATGGCAAAGTTGAAAATAAAAGATACGGTTGAAAATTCATTAAGCATTTTTAATGACCCAAATATTTTAAGTTCTGTTATTTCTAATTCAGTAAAAATTTTAAAAAAAAAGAAAAATTTAAGAAAA…	1125	1025	0.465893
PF3D7_0729900	PF3D7_0729900_e2s1	ATTGAAGCAGAAAATTATGAACATGTAATGGATTATGAATATATAAGAGTTATTGAAAGTACTTGCTTATTATTACAAAAAGGATTTGATAATTTAGTTAAGAAGAATGAAAAAATAAATAATACATTATCTGATGATGATATAGAAAAATATATATCTAAATGGTTAGTAGTAAGTATTTTATGGGGTATAGGTGGCTCCTTAAATCTTGAAACACGAGAAAAATTTTCCATGTTTGTTCAATCCATTTGTTCTATACCATTACCTAATGATTTATTATCGAAAGGGAAAATGCCTAATATGGATAATACTAATAAAATATCAAATACGTTATTAGATTATCAACCTAATATTGAAGATGGAGAATGGATAAATTGGAAAGAGCTTGTACAAATAATA…	2406	1101.5	0.45783
PF3D7_1444100	PF3D7_1444100_e8s2	GAAAAGATTGAAAAAATCATAGAATCAATAGATCTAAATAAAGGTCTTCTTATTATTGAAAAGGATAAAGGTAGTAGAGATGTGGAAGATAAAAGTGTGTATGATAAAAAAAATGAATCTTTATCTAATTTAGACACAGATTGTCATAATGTAAATGAATACAAAGAAGAAAAAAAAAAAATTTCAGAGATATACAAGGAAATTAATACGGAAGAATGCAAAAACATGTTGGATAATAATAATAATAATAATTATACTAATAATAATAATAGTAATAATAATTGTACAAATGTTGCAGATACCATATGTTATGAAGAAAATGATGAACATGTTTCAATAAATAATATGGATATACAAAATAATAGTATTCATAAATATAGTCCTGTAGAACAATTATAT…	3012	1075	0.444246
PF3D7_1232100	PF3D7_1232100_e1	ATGAGAATGAAAAGAATTCATATTTTGTTGCTTGTAATATTTTTGTTATGTTTGCGGTATGGATATAGTATTAAGAAGAAGCGCAGTCCTAATAACAAGAATAGGCTTTTTATAAATAAGAGATTGAAATATATAAATAGTAAGATAATAAGTAGAAGAAAAGAAAATTATGTAAAGATGAAAATGACAGAGAATAAAGTGAAGGGTAAAGACATAATATATGGAAATGAGTGTCGAAATGAATTATTAAAAGGAATATTAACAGTATCAGATGTTGTGAAATTAACATTAGGTCCAAGAGGGAGAAATGTATTATTAGAAAAAGAATATGGAAGTCCATTAATAATAAATGATGGAGTAACAATAGCAAAAAATATATCTTTAAAAGATCGAAAGAAA…	1023	1059	0.417073
PF3D7_0801600	PF3D7_0801600	ATGGATATAAATTTAGAAGAGAGGTCATATACCTCGCCTTTGTTATATTACATATATAATAAGGATGATAAAATAAATAGAATTTCTCCTGGTGAAATGAAGAATAAAAGTTTTATACCTTATAGTATAAGATTATGTAATTTACCAATAAAAAATACGAAGGATAATTCATATATGTCTAATATAAATTCTTTAAATATAATTAATATGTTACCTTTATCTTTATTTTCTAATTATAATAGTAACAATATGACATCAACTGATATTTTATTTCTACCAAAATTTTCAACCTTTCTATTTTTTACCATACCAATATTTGTAATGTTGCCTAACCTTACGTTATATACAAAGCACTGGTTTTTCTATGCCCCCAAA	375	1044.5	0.408363
PF3D7_0522400	PF3D7_0522400_e3s6	AATCATTTTGTTGATTTTAAAGAAAATAATGAACAAATAGAAACAAATAGTATTTGTAGCATAAAGTTTCAAAAAACCAAAACCAGTGTATTTTCATTTACAAACGAGAATAATAATAAGGATGATAAAGATATGACACAAGAAAGACGTGTAAACAATGGACTATCCAAAAAGATTAAAACAACTATACAAAAATTTTTTACTAGAAAATTATCACAAACATTATTATTAAGTAATAAAAAGAAAGAAAAAAAAAAACAAAAAAAGGATGATCATTCTTTAGGTAGTCTTAATTCTATATACTTTAATCATAAAAAAAAGAAACCATTTTTAAAACAACATGATAAGTATAAAAATAATATAACACATGAAAAATATCTTTGTTTAAAAAATAAAGAA…	2802	980.5	0.404006
PF3D7_1122900	PF3D7_1122900_e2s5	ATAAGCGAAGAAGAGGAAGAAATTTTTATTAATCCTAAATATAAATTAAGTAATAATAATATAACAAGTATTAGAAATAAAAAAGAGAATGAAAGTATGGAAAAAAAATTAATGAATAAATCATTTATTAATGAAGAATTATATGAAGATTGTAAGAATCTAGAAAATTTAAAAGATTTTGAAAACATTACTGAAAGTTTCGAAAGTGAAAGTATGTCATGGAAACAATGGTTTTTAAGTGAAAAAGTAGAAAATGAAGAATTACCTAGAAAATATAATAATATAAAAGATTTTTCTAAATTATTATTAATTCGAGTTTTACGTAAAGATAGATTTTTAATTGCATTAAAAAATTATATTACAAAAAATATAAAAATGACAAATGATGAAAAAAATAAT…	2610	978.5	0.400237
PF3D7_0709000	PF3D7_0709000_C	ATGCTCGAGATGAAGTTTGCGAGCAAGAAGAACAACCAGAAGAACTCGTCAAAGAACGATGAACGCTACCGCGAGCTTGATAACCTGGTTCAGGAAGGTAACGGAAGCCGCCTCGGCGGCGGCAGTTGCTTAGGCAAGTGCGCACACGTGTTTAAGTTAATCTTCAAGGAAATCAAAGACAACATCTTCATCTACATCTTGAGCATCATCTACTTGTCTGTTTGCGTGATGAACAAGATCTTCGCCAAGCGCACCCTGAATAAGATCGGAAATTACTCTTTCGTTACCAGCGAGACGCATAATTTCATCTGCATGATCATGTTCTTCATCGTCTACTCGCTGTTCGGTAACAAGAAAGGTAACAGCAAGGAGCGTCATCGCAGCTTCAACCTGCAGTTC…	1355	1040	0.388539
PF3D7_0905300	PF3D7_0905300_s1	ATGATGGAGAGGAAGAATCAAGATTCTCAAATTTATAACACATACAAGTGGGTTCTGAATAAACTTAAATTTTCCTATAAAGAAGAAAATAATATTGATTACTTAATAGATAAAAATATTGAAGAAAAGAAAACTGTTGTTGAAAAGTTTCTATGTGATGAGGAAAATGATTTATTGTTGTTTAGTTTAGAAAATAACGAAATGGTTATTGCAAAGGAAGAGAATATAAAATTTGATCAGAAAATTGTTTATTTTTATAAGCATTTAAATAAAAATAGAAAAGATGATAAGAAAATATTATATGGGATATTATCTCCTAATATTTTGGATACGTTAAAATTAATGCTTAATAAGATAATATATCCACTGTTTATAAATAACAAATTGATTAATACAAAC…	2670	1030	0.387284
PF3D7_0114000	PF3D7_0114000_e2s2	GAAGAGGTATCAGAAGATAAAGGGGATATTGAAGAGGTAGAAAAAGAGGAGACATCAGAAGATAAAGGGGATACTGAAGAAGTGAGGGAAGATGAGGTATCAGAAGATATAGAAGATTCTGACGAAGTAGGAGAAGGCGAAGTATCAGAAGATATAGAGGATTCTGAAGAAGTAGGAAAAGAGGAAGAACCTTATGAGAAAGGCGATTATGAAGAAGTAGGAAAGGAGGAAGCATCATATGATAAAGGAGATGCTGACGAAGTATCAGAAGATATAGAGGATTATGAAGAATTAGGAAAAGAGGAAGAACCTTATGAGAAAGGCGATTATGAAGAAGTAGGAAAGGAGGAAGCATCATATGATAAAGGAGATGCTGAAGAAATAGGAAAAGAGGAAGCA…	2136	971.5	0.383672
PF3D7_1451600	PF3D7_1451600_e2s1	AAACTGACGGAATATCGACAACAACATAGGAAAACCGTGGATGGGCGTCTATGTGCAGCAGCCTTTGTTCAAGACGATCAAACATATACAGACTGCACTAGGGCAACAGATCCTAATGGTATAACGGGAAAGGAATGGTGCTATGTGGAGGTTCAATTAATAGGAAAAGGAAATAGAGATTGGGATTATTGCAAAGGAGTAATTAATTATGATGTTGTACGAAGTAAGGCACGTACTTTTTTCCAATCTAAATCCAATGAACTTCTTGATGCTGTAAACAAATTAGATTTTGAATACAAAAAATTAGTTGGTATATATGAAAAATATAAAGAAGTATGTGGTAATGCATCCGATTTGTTAAAAAAAAAAATTCAAGATATTAATGATTTAGCAAAAAAT…	2508	1020.5	0.372467
PF3D7_0825700	PF3D7_0825700	ATGCGCAATATCATCTTTCTGTTCTGTTTGATCCTGTTCCTGGTATGCTTCTGCCAGGGCCACAAGAACTACCTGAAACGCGACAACTACCTTCAGTACTTGCGTAGTCAGACCTTCCTTCAGGAACGTTCGAAGCACAAGAAGTTTAACCGTAACTACAGCGAGGACATCAACGAGTTCGACGAGTACGAGGACGAAGAGACCGACAACCTGGACAACAAAATCAGTGACGAGATTAAGAACAAGAAGAAAGAGAACTACTTGTCACAGAACATCAACGAGCAGAAGAACGACTCCATTAACAACAACAACGAGAAGAAGCTGACCTTCAAGAACATCGAAAACGAGATTAACTCAACGGACACCTTCATGGACGACAGCAACGTCAAGTCCCTGGGG…	915	961	0.370841
PF3D7_1206100	PF3D7_1206100_e2s1	GTTATGAATTCAGATATGAAAAAAAATATTGTTCAGTGGAATAGTCGATATAGCTACAATCAATTAAAAAACAAAGACAGTTTGATCATGTTTCTTGTAGAAATATTTAGATCTCTTTTTGTATCCAATTGTATTGACAAAAATATTGATAATGTTTTATTAAGCATAGAAGAAATGTTTATTGATCATTATTATAATCCACAACATAGTCGACTGAAATATTTGATAGATGATGTTGGA	240	949.5	0.357281
PF3D7_0605600	PF3D7_0605600-S4_C	ATGCTCGAGAAGAAAGTGATCCACTTCGTATACTTCATCGAAGATGACAACTACAACGCGCTGAACGACGAGCGCATCTGCAGCGACGTAATGAACGAGCATGTATTCAGCTTCATGCTTGAAGAGGTCGGCTTAGAGAAAGTTGGTCGCATGGTGTCAGAGGAGAACATCCTGGACGTTGAGAACGCGTCGGACGACCAGAACGTCATTACAATCGAAGGCGTCCTGAACGAGCGCAACACCACGAACGGCAACGTGGACTCGGCCAAGATCTACGAGGAAAACGAGAAGGGTCGTGACAACGAGATGAAGAAAGAGGAAGAGAACAAGAAGAACAAGAAGAACAAGAACAAGAAAATGAAGAAGAAGATGAAGAAGAAGAAAGAGACAACCAAGAAG…	1220	1005.5	0.354427
PF3D7_0910100	PF3D7_0910100-S2_C	ATGCTCGAGGATGTCCTGCGCTCCGAGCAGCTTGAGCTGATTTCTAACCTGAGCAAGCTTCAGTACAACTTCATCGGAGCGAAGCTGCTGAGCATCTTCTACGAGCTGAAGAGCAACCACGAGAACAACCTGATCTCTAAGACCGTCTTCATCGAGCAGACTACTTGGCTGGTGTTCATCATCGCCTCAATTATCAGCAGCTCTGCGATCAGCAACATGAAGAACTCCTCGTTTAACAACTTCAAGATCAACTCTGAGCTGTGCTTTCTGGTGTTCTCGCTTATGGACCAGACCAATAAGAGCCCCGAGGTGTTCGAGTACTTAGAGTTCGCGTACCTGAACTGCCTGGAATTATTCAAGAAAGTTTACATCAGCGGCAAGAAGAACAACCAGTTCCTC…	1583	937	0.338583
PF3D7_1407000	PF3D7_1407000_e1s2	ATTTATTGTTCTCATGATGAAGATGTTATTGTTGGATGTGTTGGAGGTGATAATAATTCACATGGAGAAGAACAAAATAAAAAACATTTAATAAATTTGGAAAAGAAAAAATTTCATCCAAAGATAGAATTAACATGTTTTGATAAAATGTTATCCAAATCTAATCTAAGTGTTGCGACAACAGGAGATGTGTTTTTAGCTAGTTGTCCTGAAAAATGTGATGAAGAAGTAGGCATTGTTAAAGGAACATTTTTATATACATATGATTCTCCTATATGTAAATCCGCAATTCATTCAGGTGTACTACCAAATAATATAGCAGAAGATATAGTATTATCAATTGCCCATACACATAACAATTTTATAGGAACAAAAAGAAATAATATAGAATCTCATGAT…	1932	932	0.330861
PF3D7_0804500	PF3D7_0804500_e1s4	ATTTCGTATAATGTCTCTACTCATGAAAATAAAAAAAATGATAATATAAATGGTGACAAAATAAATGGTGACAAAATAAGTGGTGACAAAATAAATGGTGACAAAATAAGTGGTGACAAAATAAATGGTGACAAAATAAATGGTGACAAAATAAATGGTGACAAAATAAATGGTGACAAAATAAATGGTGACAAAATAAATGGTGACAATATAAATGGTGACCAAATAAATGGTGACAAAATAAATAGTAACAATTTTATGGAGACCTCGAGTACACCTCAAGGTTTTATATCAAATAATATAAGCCCCATATCATCCAATTTAGCTGTCTTTTCAAATTCACCTATTAATAGTAATTCTGTTCATGAAAAAAAAAATGACGACGAACAAAATGATACT…	2742	1007	0.325077
PF3D7_1306500	PF3D7_1306500_e3s3	TATGATAATTTATATGATGACAAAGAAATAGACGATGTCTCATCAATAATTCAAACCTTCCATTTAAATGAAAATCCAAAACAATATGATTATTTATTAAAGAAGATAGAAAGATCAAGATGTTCAAATTTATTTAATATAGAACATGATATATACGATTATAATAAATGCATTCATAGAGAACTCATATTTTATAACAGGAGCCATGAAACTTTTTCTAAATATATTGGAGATATGAAAAATATGCTATATAATGGGAAAGGGAAATTATATGATAAATTTAATAGTTTAATATATGACGGAGAATGGAGAAATTGTGAAAAAAATGGTAAAGGGAAATTATTATTCAAATATTTTAATATATGGTATTTATATGAAGGTAATTTTTGTAATGATGAA…	2643	927.5	0.323612
PF3D7_1436600	PF3D7_1436600	ATGGAAGAGGACGACAACCTGAAGAAGGGTAACGAGCGTAACAAGAAGAAAGCGATTTTCTCTAACGACGACTTCACCGGTGAGGACTCACTGATGGAAGACCACCTGGAGCTGCGTGAGAAACTGTCCGAGGACATCGACATGATTAAAACCTCGTTGAAGAACAACCTGGTGTGCTCAACTCTTAATGACAACGAGATTCTGACCCTTTCGAACTACATGCAGTTCTTCGTCTTCAAGTCCGGCAACCTCGTGATCAAGCAGGGTGAGAAGGGCTCTTATTTCTTTATCATCAACAGCGGGAAGTTCGATGTGTACGTGAACGACAAGAAGGTGAAAACCATGGGGAAGGGGAGCTCCTTTGGAGAGGCGGCCCTCATCCACAATACACAGCGCTCT…	2559	928.5	0.321087
PF3D7_1475500	PF3D7_1475500_e1s2	TCTATATGTAGGGCTGCCATACATTCTGATATTATAGATAATAAGGGAGGTTTAGTTAATGTAACTATTGAATCTGGTATGGACCATTATGTTGGGTCTATAAATAATAATATAGAATCTATTTCATTGAATAAAAATGAAAAAGGTTTATTAGATATAATACCTGAAGAGAAAGAAGGAACTAATAATATTAGAGAAGAAAGTAGTATTTTTCATCATAAAACAATTAGAGTGAGTAGTTTAATAGAAGATTGTCCATTAGATTTATTTTTGTTTAATCAAACATCCTTTTTAGAAAAAGGAAATAATATAAGAAATAATAAAGGTACTGAATTGAAATATAATGACGATGAAAATATGACTGTTAAAAATTTTCATGAATTAATTTCCAATTTAATG…	2454	973.5	0.307459
PF3D7_0820700	PF3D7_0820700_e1s1	ATGAGAAAATTTTTTTACACAAATAATTTGGTAAGAAATAATGGAAAAGATATAAGAACACGATCATTTCATTTAAGTTCTTGCTTATATGATTATAATTTTAACCCAAGTATGACCTCGTATATTGAGAATACATATAAGATATGGAAAGAAGACAGA	159	973	0.30442
PF3D7_1120700	PF3D7_1120700-S2	GATTATCTGCTGAAGATGAAGACGTTCATCCAGAACGATATCCCCCACATCATAAAAAAGAGCGTCGACATACACCTGAGCACCAATATTGACACAAAGATTCAGTCGGCGATTGAGAAAAATATTATGGACTTCATCGAAAACAATCTGTTCAGCATCATAGAGAAAAACGTGAATGACTTCAACTCCCACTATATCTACGACAAAATTAACGACTGCATTAATAATGAAATCAAAAAAAACATCGACTTGGTGTACACTAATGTGAAGGACAAAGTAAATAAGAACATCAACGACGAGATCACCAAGAACGTGGACAATCTCAACAACTCGCTAAACAAGAACATAACTAAGGAGATCGAGTACAACATGGAAAAGATTTACATTAAAGTGAACGAA…	1383	993	0.303385
PF3D7_1032800	PF3D7_1032800_e4s1	AAAGTGTTGGATTTATCGTTTAACAAAATAAAAATCATTGAAAATTTAGAAACTCTAGTAAATTTGGAAGAGTTGTATTTATCTAGCAACAAAATATCAAAGGTAGAAAAATTAAAAAAAAAAAAAAAAATCAAAACGTACAGAATGGTAGAT	153	907.5	0.292237
PF3D7_1218800	PF3D7_1218800_e1s1	ATGTTATTATATCTTTATAAAATATGGTATCTAATTTTATTATGGTTATATACACATAATCAATATAAATGTGATCTAAGACTAAAACCACCAGAATGTGATGTTTCAATAGATACCTCCATATGTATTAATAATGGACAAAAAATATTATTACCATCGGCAAAACCATATGGT	174	965	0.291954
PF3D7_1010700	PF3D7_1010700	ATGATTAATAATAATTTGTTCGTGTTTTTTCTTTTATCTTTTTTTTTGTCAAAAATATGTACATGTCTTTATGTAACTGATGGTAGTTCAATCATTTTGGAAAATATAGGCACAAAATATAAATTGTTTTCTACTGATATGAAATGGGGAACGGGCTCAGGAAACCAGCTAGTGACCGCAGTAACTACTAATAAGAATGAGGACGATTTATTATGGACCGTGAGTCTTTACGAAGAAGAAAAAAGTGTTACGGGAAGAAAAATAAATTGTGATGAAATTGTTACATTGAAGCATGTGAAGTCGAATGGGTATTTAATAGGTTCGAAGCATGATTCTATTTTGTCTAATAATTATGAATTGAGTGTACATAAAGATAATGAGTCTGGAAAATTTCAAGTA…	669	963.5	0.290893
PF3D7_1239400	PF3D7_1239400	ATGAAGAACGCGTATTACTTCATCTTCTTCTGCTCGTTTCTCATCTGGGTTAACACCATGAACCCGGGTCGCCAGGGGAACGAAAACTTCAGTGAGAAGAACTCCAGCGACGAGTACGAGTACGTCGACTCAGCGTATCCGGGTTTTAATATTCACTATAACCTTGAGCCCAAGGACTGGAAGCACATTGAGCTGACTGAGAAGAATAACAAGCAGTTCATGATGGACATCAAGAAGGAGATCAAGCGTATGGAAGAGGACAAGAAGAAGATCAACTACATTCTGAACGTCCAGAAGCAGCAATTTCAGGAGCTTCTCTTCTTGATCGACCACAAGAAGTACAACCACCAGAACATCAATATTGACGAGATGCCGGATTTCCTGAAGAAGGGCACTTTC…	537	906	0.290036
PF3D7_0826100	PF3D7_0826100_s5	TTAAGTATATTAAGTATTATTGAATATTTAACTACTACATATAATAATGTGGTTTTTTTTATAACTTATTCTCCTCCAAATATTTATAAAGATTTTAAAAAGGTTTTTCAAATAGAAGAACAAATGCGACAAATGAATAGAAGAAAGAATCTAAATCAAAATGATGATAATCAAAAGAGTTTCGATAAATTTCATGTAAATAATAATGTAATAATTAATGCATCAACAAAGAAAGCCAAGGAGGAACTGATTAGTAATAACGACATAAATGTGGAAAAAGAAATTCATAAAAATAATAATAATGATAACAATAATGACAATTTTAATATTCCTCCATTTTATTCAGTTGATGGTTTTAAGGGAGAAAATTCCAATTTTTATGAACAAAAATTATCATAT…	2913	906	0.28995
PF3D7_1253000	PF3D7_1253000-e2o2	AATGTAGGAAGAAAACGTGTGTTATCGTTCAATATTAATAATGTGTATTCAAGAATTTTGTCCGATTTAGAAGAAAGGGAATCTGAGTCTTATAATAATAATAGTAATTTGAAATACAACGATAGTGAATTTAAATATAGTTTTGGTTATTATAATGACGATACTAGCGGAATGAGTACTTTTAATGGGAAAGATATTATTAGTTATTTAGAAGAAAAAAATGATAATGTTCTTGATGATTATAATGAAGATGATAATTCACCTGACATGGATACTGATGATCCTGTAGAGAGTTATTATGATTTATTGAATGTTGATAAATATGGAGATTTGAGTGAACTCAAAAACAATTTTTATAATTTATCTTTGAAATACTATCCGAAGATGAAAAATGGAAAG…	1341	910	0.289548
PF3D7_1214500	PF3D7_1214500_C	ATGCTCGAGATGTTCCGTATCTCCCCGATGCTGCTCTTCTTCTTATTCTACTTTTCATCCTACAACATCTACTTCGTACTGACACGCAATAAGAACGGCCAACCTAGCTGCAGCAACGTCAGCTGCAGTAACGAGAAACTGAATTACATCTACGACAATAGTAAGTTCATCCTGAGCGAGCTCCAGAACATCCTGTACGACGTCCGCGATCAGCGTAACTCGCACGAGTTGGAGAACGAGTACGACAAGGAGTTGGACATCCAGATTAAGTTCCCGCACAAGAAAGACCACCACGACCTGCAGATCTGGGACGACGAGTACGAAGAGGAGAAGCAGTACTCGGAGCCGGTGCCGTACATCACGATCACCAACATTGAGGAAGACAGCGACGACTTAAAT…	641	963.5	0.286496
PF3D7_1346400	PF3D7_1346400_e1s4	AACAATAAAAGCAACCATAACAATAAAAATAACAATAACAATAAAAATAACAACAACAATAAAAATAACAATAAAAATAACAATAACAATAAGGATAATAATAAAAACAACAGTAACGATAATAATAACATCAATATGGACAATAACAATAAAAATAACAATAACAAAATATTTGATCCTAAGAATATATCGAACCCACTTCATAATTATCATAAAAAGAAAATATTACTATGTGATAATTTGAATGTAATGGGTGAAGCTGTTTACGAATCAGTTGATACAAGAACTGAGGATTATAAATTAAAAAGTAGTGTAATAAGAAAAGATAACAATTCACCATTTATAACCGTTTTTGAATTAGATATAAATATTGGTAATTTTGATATACGTTTATCAAAT…	3039	901.5	0.282792
PF3D7_1032500	PF3D7_1032500	ATGGACATCAGTGGACCAGAGGTATGGTATAACAACCTGCCCAATGTGACGAAGTACGTTATTACCCTGATCTTCCTGGTTACGCTGCTGATCACTTGTAACCTGCTGAACGTGGTTTACATTCTGCTGGACTGGAACCTGATTTACTACAAGTACCACATTTGGCGTATCTTCTTAAATTTCCTCTACGTGGGAAAGTTCTCGCTGAGTTGGGTGTTCTTCATGAGCCTTTTCGCGCAGTTCAGCAGCAGTCTGGAGAAGAACGGCATCTTTACCAGCCCGGGTTCATACCTTTACTTTATCACGATCCAGTGCACTTTTCTGAGCTTAATTAGCATCCTGTTCTACTGGCCGCGCGGATACCCGTTCTTAGGCAATTCCCTTTTGTTCGCCATCATT…	789	902.5	0.282587
PF3D7_0520600	PF3D7_0520600_C	ATGCTCGAGATGAAGATCAATATCATCAAGGCATTCGGTATTCTGCTGTGTCGTTTGAAGAAGTACAACCCGGTCACCACCGGGGACATCAACAAATTCGAGTTCTTATTCCTCAAGGCAAGTTACGCCGACAAGCACTGGACCCCGCCCAAGGGCCTTCACGAGAACAACGAGTCGGGACTGGAGACTGCGGTGCGCGAGACTTTAGAGGAGACCGGGATTAACAAAGACAAGTACAAGCTGCTGAACTACCAGAAAACGCTGAAGTACAACGTTAAGGACAAGCCGAAGGAAACAACTTACTACCTGGCCATGCTGCTGAACAACGAAGAGAACGTGATCCTGTCGGACGAGCATACCGACTACAAGTGGATCGGCTCACACGAGAGCGACACTTAC…	539	958	0.280959
PF3D7_0726400	PF3D7_0726400_e3s1	CAAATGGACCCAGCCAATATCAACAATAACACAAAGATGCTAAAAGAAATAAAAAGATTCAACTTAAAAAAGAGTACAGATATATATTTAAAAATAGAAAAAGAGCATTTTTTAATTATATCTTATTGTGATGATAAAATAGAAGGATTGTTTTATATAATTATACATAATTTACAGAATGATGAAAGTGAATATATAGAAAAGAATATATCTGAATATATTATAAAGAATGAAATAAAAAAAAGTATACAATGTATTACTTTAAATAAAAAATACATCGTTTTATTATTTAACACAAATGATATTATAATATTAGAAAATCTGAATTTGAATAATAATTATGAAGTTTTTAAATATCTTAATGAAAATAAAACGGACAAATTAAAATATTTCAACAAA…	1668	897.5	0.269638
PF3D7_0402100	PF3D7_0402100_e2s1	ACTGTTGGTATATTTTATCAAGGGGACTACTATTCTTTTAATTCCGAATTTAATAAGAGGTGCTCAAGAAAATTATATCATGAAACAAGTTCACTAGAATCTGATGAAGTAGAAGAACATGGCAAATTGTATAAACTGACCGATGTGATTAATTATGGCGAAGGGTCTTTATTAAAGCAAGTACCAAAAGAAGAATCAGAGAATAGTAATAATGATATTTTTGAGTATTATAAAACATTATTTAATAATGTGAGACAACATGACGAAAATAATTTTTCTGATAAAAGTGGTTCTATGGTTTTGAATGAAAAAGATATTCAATTAGAAAAAAAAATTGAGTTATTAAAAGGTGATAATAATAATATAAAGGAAAGTATGAAAAGCATATGGGTAGATGTT…	1641	966	0.26804
PF3D7_0109950	PF3D7_0109950_C	ATGCTCGAGATGAGTTACATCAAAGTGCCTAGCGACATTACCCTGCTGGAATACAAGTATTCTAAGAACAACGAAAAGAAGAAGATCAACTCCCTGAAGAAGTTCTTCATCTACCTTTCGTTCTTCACGTTCGGCAATAATTGTAACAAGCTGGACTCGGAAGACGTTATCCACATTCTGTCTAACGTGTACAGCGACAACAAGATTTGCGACGACGACAAACTTAACTCCTTTAACATCCTGGACATTCTGAACACCCGCCAAAAGGACATCGATAAGCAGGTGAAATGCAAGATGTACTCTTTTCTTGGCTCTTTGCTGTTCCCAATGTTCTGTCTGTCTCAGTTTAAGTACTATGATAGTAAGACGAAGATCATCATCTTTCCGTTCACGACCATC…	584	949	0.267603
PF3D7_1002100	PF3D7_1002100_S1	ATGGAAAATATCATCAACAAAAAAAACACCAATGGTGGTAACAGCAACATTTTTGTGCTGCTGAAATACAGCATCTACACCATCCTCCTGTGGATCGTGACGATCACTTATAATAACTACACCTACAACGGGTATAACAACGATGGCTCCAAGCAGGTGCGCTGCAAACGCCTGCTTTCCGAACCGGCAGTGGAGTTTGATACCATTTTCGATGTGTTTAAAGAGTCCTTCCTGGATCAGATGGGCTGCTCCGACCAGGATAAAGATGAAATTAAAAACGCGATGAAAATTTATTACGACAACATCGATATGAATGCCCTGTCGAATGAGATTCAGACCAATGATAACTTCTTTAACGAATTTGGCAACGACGTCAACTCGATTAACAAGATCATGAAG…	1020	895	0.266417
PF3D7_0307900	PF3D7_0307900_e3o3-s3	ATAAATCCATATGTTCATTCATATTATAATTATAATGATATATTAAAAAATAGAATATGTTGTAAACAATTAAATAATTCATATATTAATGTATATTGTCCTTATGTTTTAAAAAAACATAATTGGTTATATAAAAGTATAGATAATATAAAATTAGTTTATGACGAAAAAGTATATTATCTTTCAAATCTTTATCATGCTTTTATTTTCAGCAAGAATATAAAATATTATCAACATAATTTTAATATCCCACCATTAAGATTATTATTTTTATATGATGTTCCATATAAATTTAATAAAGATATCAAAAAAAATATGGTTCGTAAGTTTTTCTTTAAATATATAAATCTAGAAAAAGAATGTATTATATATATTAAATATGTGTTTATTTATTTGTTA…	1500	954.5	0.26263
PF3D7_1354400	PF3D7_1354400_C	ATGCTCGAGATGTACAATTCGTGGTTCGAGATTGTCCGCTCTATTAGTCCGTACAATTGGGCGATGTTGGGAATCGCACTGAGTTTGTTCCTGAGCATCATGGGCGCGGCCTGGGGAATCTTCATCTGCGGGACGTCCATCGTAGGCGCAAGTGTAAAGAGCCCGCGCATCATTAGCAAGAACCTGATCAGCATCATCTTTTGCGAGGCGCTTGGGATGTACGGCGTGATCACAGCCGTTTTCTTACAGATCAAGTTTAGTGGCCTTAGTACTGAAGTTCATCCGCCGCTGGTCCTGACTAACAAGACCGACCCGCTGATCATGAACACTATCCGCGGTGGCTGGGCTCTGTTCGCCAGTGGGTTAACCGCGGGCCTGTCCAATTTGGTCTCCGGCGTC…	626	888.5	0.261907
PF3D7_0922100	PF3D7_0922100_e1s1	ATGGCCGAAGAAAGGAATACAATAAAGATAAAAATAAAAAGCATAAACAATGAAGAATATGAACTAAATGTAAAAGATGATATGAATATAGAAGAATTAAAAAGTATAATTGCTGAAAAGAGAAATGTTAATATAAACGATATAAGATTAATATATCAAGGACAATGTTTATTAAATGAAAAAAAATTATATGATTATAATATACAGAATGATCATATAATACATTTAGTTGTTAGAAAAAAGGATAATAATACAAACAATAATAATAATAATAGTAATAATAATGCAGAACATGTTAATGATAATATGAACAATAATAGGACTTATGAACATGTGAATGAACCATTAAATTTTAATTTTATACCTAATATGAATCAGCCAAATAATGGAAACCAAGCA…	2151	887.5	0.25896
PF3D7_0625100	PF3D7_0625100	ATGGATTTTAAAAAATTCTCTAAAATTTATGAAGAGTCAGTAACAGATAGCGAAAATGATAAAAGTTCGATAGGAACAGATATGTATGAAATAAATATGAACAGAAAAATGAGTAACATAAGTATATCAAGAAATAGTACAATAAATGAAGAAGAGATATTAAGTGAATATAGATTATGTAAAATTTTATTAATAAAATTAATGTTTGCATTATTATTTTTATTAATTGCATTGATTATACAAGGTTTTTTTATGATATATAGTGATTCCTATTATAAGAGTAATACGCAACCATTAAGTGATCGAATACATGATTTGTTTGGAAATCCACCCAAATGGATTTCCTATAAATTGTCGAATACATTAATAGCTATATTAACATTATCTTTTCTTAAAATA…	1197	959	0.257932
PF3D7_1038400	PF3D7_1038400_e6s2	CCTGAAGAACTAGTAGAAGAAATTATACCTGAAGAAATTGTTGAAGAGGTTATACCTGAGGAATTGATTGAAGAGGTTGTACCAGAGGTATTAGTTGAAGAGGTGATACCTGAAGAACTAGTAGAAGAAGTTATACCTGAAGAACTATTTGAAGAGGTTGTACCAGAAGAATTGGTTGCAGAGGTTATACCTGAAGAAATTGTTGAAGAGGTTATACCTGAGGAATTGATTGAAGAGTTTGTACCAGAGGAATTAGTTGAAGAAGAAGTACCTGAAGAACTAGTAGAAGAAGTTATACCTGAAGTATTAGTTGAAGAGGTTATACCTGAAGAATTTGTTGAAGAGGTGATACCTGAAGAAATTGTTGAAGAAGTTATACCTGAAGAAATTGTTGAAGAG…	2343	949	0.254686
PF3D7_0710100	PF3D7_0710100	ATGAAGAGCTCGGTATTGCGTAACCTGCAGATGCGCTTCTACAGCAAGAACGGCCAAAACAAGTACTGCGACCTGTTCCCGATGAACATGGTGGTGCACAACCGTCACATGAAGTACATCATCAACCTCAAAGAGCAAAACTACTCAAGCTTCTTCAACAAGATGAACAACAACACACTTTGGTTCCGCAATCAGCGCTACATGTTTAACATCAAGCCGAACATTAACTTCAACAATTACCGCATGTTCAGCGGCAACGCTAAGAAGAAGCGTATTGGTAACAAGAGCTTAGAGGAGCGCAACATTACCAAAGACGTTGAGTACATTTACCAGAACAACAACAGCGACATGTTCTTCGACAGCGACGAGAAGTCCTCTTACGTGAACAACTCGGAGATG…	1377	884.5	0.254512
PF3D7_0522400	PF3D7_0522400_e3s7	ATTATTAGTAGCAACCAAAATGATAGACATTACAAATACGTGAATAGGAATAAAATGAAGAAACGACGAAATGTACAAAATAATAAAATTGGTAAAGATAAAAAGAACAAATCAAAAGACACAGAAAGGGAAAAGTTAATATATAGTATAAAGAATACTAAAAAATTAGAAAACATCGAAAGTCAAAAATGTACTAATAAAGATAATAAAATATTGTATACATCATTTAGTAATAAAAATGAAATATTTAATGTGCAAGATAAATATACTTATAAAGAAAGGAAACATATAAAGGATATCTCGAAAAAAGGAAATGAAAAAATGAAAGGTAATCTATATAATTTAATTAAAAGAAAAACTATATATGAACATAACTGGGAAGAAAACCAATATAACTAT…	2793	956.5	0.252855
PF3D7_1465700	PF3D7_1465700	ATGAATATATTGTTTTGTTTATTTGTCATTACAAATTTGTATAATATCATTGCTGTTAAAGCTTTTAAAGAAAATTTAAGAGTGTCCAAATATTATGCTGGAGGAAAACATAAATTAAATTTGGAAAATAAGTATATAGGTATTTCTACAATAGTATTAAAAGGGGGTTACATCAATAGACAATTTATTGGGGAAATAAATATTGGAAATCCTCCACAAACATTTAAAGTTCTTTTTGATACTGGAAGTACAAATTTATGGATTCCATCAAAAAATTGTTTCACAAGAGCGTGTTATAATAAACGAAAATATGATCATAAAATTTCCAAGAATTATAAATTGGTTAAAAAAAAAGATCCTGTGGAAATTTTATTTGGAACCGGGGAAATACATATTGCT…	1155	940.5	0.250516
PF3D7_1444100	PF3D7_1444100_e1s1	ATGGAAGATAATAATAATAATGAAACTCATTTGGAAAATGTAAAAAATGGGGAACCGTTTTATATTTTGAATCCTTCAGAGTTTATTCGAAATAAAGAAAAAGTTCTAAAAGAATTTATTACAAAAAAATATGATGATATTATAAAACAAAATAAATTAAGTGCTGATATTAGATGCACTTATTTTCAATGCAATCCAAAAATAGTAATATTTACTACCTATACTCCCTTTCAAAAATATGAAAGTGTTGTTTCTTTAAAA	261	935.5	0.249747
PF3D7_1432100	PF3D7_1432100_e6s1	TCAATCCCGAGTAATAAACACTTTTATGGATCCTTAGCTCTTAATTTATTTTTCCAGAACAAAAGTATAAATGACAATGCAATTAGTGTAGAAGTAATTCAAAATATAATGGAAAAAAAAGCAAATATAAATGTTGCTTCAATATGGTATCTTGATAATAAGAATACTTTTGTAAAAACCAAAATTAGCAACGATACTAAAGTTGCCTTGTCTTTAACACACAAATATAATGAATTTGTGACAATAACTCTAGGTTCACAG	261	953.5	0.248732
PF3D7_0804500	PF3D7_0804500_e1s3	AACAATGCATGTGATGATGAAGAGTGGAATATTTTAAAATATGAGAACAATAATATTTTTATATATTCGAAGAATTCCCTTTTTTTGTATGGTAACAAATTGTTGATATTAAAAGATGTAAGGCGGAGGGAAGATCAATGTGTGTGTGTAGGTAATTATAATGATGACAATATGGGAGAAAAGCAAAGTTCAGAAATAGATAATAAATCAAAACATTATCTAGCATCAAGAAAAGAGAAAAGAATAGAAGAATATTATTTAAAAAAAACAGAAAATATTTCTTTAAATAACAAAATAAAATTTTATGAAATAAATTTATTGAAGAAGTTTAAAAAGCATATATTAAACTTATATAAATTGGATGTATTAAATGGCGATGATTATAAAGAAGAAGGTATA…	2748	943	0.247997
PF3D7_0703500	PF3D7_0703500_e2s3	TTATTGAAACCATGTGATACCTTATTAAAAGATGAAGATGCATGGTCTAATAGTTTAATAGGTAGTATTACTAGTACAAAAAGTGATAATACTGTTTATAATATTAATATAAGAATATTTTCAGCGGAGAATACCAAAAAAGCTAATGTAAAATATAATAAATATAGATTATATTTATTATTAAATATTGTAACACATGAAAGAATGCTACAGGCCTTAAGGTCTATTACATTCATAAGTTCAATTCCTACACAATACCAATCACCATATGTATTTACTCCAGAAATTCGATTCTTACTATTACATTCTTATAATAAATATAGTAAATATATAGCACAAAATGGTAAATTAAATGAAGAAATAGCAAATTATGAGAAAATCAAAATGGATTTTCAAAAT…	2100	880	0.245754
PF3D7_1317100	PF3D7_1317100-S2	CAAAAAATGGAGCAGCTCTCCAAAGATCCAAATATTTATCAGCGTCTGGTTGATAGCATTGCGCCGTCGATTTACGGCCGCGAAGATATTAAGAAAGGGCTACTCTGCCAGCTCTTTGGCGGGTCGAAGATTACGGACAAATATAACAACAAGTATCGTTCCGAGATCCATATTCTGCTTTGCGGCGACCCTTCTACGGCGAAGAGCCAGCTGCTGCATTATGTGCATAAACTATCACCGCGCGGGATTTATACGTCCGGGAAAGGATCGTCGAGCGTCGGCCTCACGGCGTTCATTTCAAAGGACTCGGAGACGAAGGAATATATCCTCGAGTCCGGCGCGGTTGTTCTATCCGATAAGGGGATTTGCTGTATCGATGAATTCGACAAGATGGACGAT…	1503	932.5	0.245701
PF3D7_1031600	PF3D7_1031600	ATGCTGAATGAAGAAAAGCTAGGGGAGGAAAATGACTTGGATAAATTCAATAATGATGTTAATGAAGATATTATAAAAGATGATGTTAATAAAAGTAAGGAAAAGAAAAAAAAAAAAGTTCAATTTTCTAATAACAATGAAACGATATATTATGAGAAAGATGAAAGTGAAAATAGTTATTTTAATTTTACTTTAAACAATTTTAATTATTTTGAATGTTTTTATAATGATATATATGGTGATCATTTCAATGATCAAATTATAAGAAATAATCAATATAATGAAAATAATGGTGATGAAGAAGATGGCGATGATGAAGAAGATGGCGATGATGAAGAAGATGGCGATGATGAAGATGATGATGATGAAGAAGATGATGATGACGAAGATGGTGATGAC…	2712	878.5	0.24504
PF3D7_0727800	PF3D7_0727800_e1o1-s2	ATACCATATGATATATTTGTACATAATAATGTTGAAAAGTATGGTGAAAATATATATGATATACCTTGTCCTTGTTTTAAAGAATTATTATACGAATCAATGTTGTCTCCTTTTTTTATATTTCAATTTTTTAGTATAGTATTATGGATGTTAGATAGTTATTGGTACTTTGGTATATTCTCAATATTTATTTTAATAATTTTGGAATCACAGTTAATTAACAAACGTATACGAGAATTTAATATGATAAATGGAATGAAGGTGGATCCTCAGGACGTGTATGTGTATCGTAATTTACGATGGACTATTATGAAATCAAATAAGTTATTACCAGGTGATATATATATATTAACAAATGATATGACTGCTACGGATAATAATATATGTACATGCGAAACG…	1500	877	0.242858
PF3D7_1143700	PF3D7_1143700-S1_C	ATGCTCGAGATGAAGGTGAAGATTGGTTCATTCGAGAACTTCCTGGAGCGCTTAAACAACATTAAGGAAGAGGACATTATCATCAACGACGAGAACACCGAGGAAATGTTCAGCTCGTTCTTGATTACGTTCTACAAGGAGAACGAGGGGCGCTACACCATCCAGGAACAGGAGTACATTAACAATCTGTTAAACATTCTGATTAACAAGATCCGCGACAACAAGAACGGGCGCAACTTCTTCAGCAACCTGCTCTGCATCCACTTCAAGTCTATCACACCGTACTTCATTAACGTGAAGCTGAAGGACAACATCTACTACATCCACCTGTTGATCAACTACATCCTGTACGTGCTGAACCTCGTGATTTACATCGAGAAGGAGAACAAGGAGTTGTCG…	1583	939	0.242171
PF3D7_1331300	PF3D7_1331300-e1o2	ATGGATTTTATAAAAGAACAATATAATTCGTTAGTCCTAGACCTTAGAAAGACATTTAGAAATAAAAGAGATGGACTATCTCATATTTTAAATGTCATATGTTTATTACTTAACGCATTGATGATATGGAAACTTTTGGTAGTATTCACA	150	876.5	0.241328
PF3D7_0323100	PF3D7_0323100_e1o1-s4	ATTAGTAATAAAGCTAGAGCTATCATACCACCCATTTACAAATATATTATTCAAAATAGTAGTAATGTTATAAAAAATGATGTGTCATGTAAAAAGGCAAAAATTAATAACCCTTCATCACATATAAAAGAAAATAATAAAAAGAAAAATTTTGAACACATTTTTTATCTTCTTAAAATGTCTATGCATAATTCCCCATATGTTCATTTCTTTTTAATCTTTTTTATAATAACCGTATTTACATCCTTATTTTATTATCGTCGA	264	949	0.240496
PF3D7_1211700	PF3D7_1211700_e1s1	ATGATAGGAATACAAGAAGGTAGAGCATTTTTTAATCCTACGAGAAATCCTAATAATAGACCAGAGAATAATATTAGAATAGAAGAGAATTTACCAAGTCTTAATGAAGTATATAATTATTTTCAAGATTTTTTATCGAGATATTCTTCAAATACATTAAAAGAAGGAAATTTGAAAAGAACCTTATTTGAGAATGTTAAGAATAATAATTTTACATTAGATTTAAAATTAGATGATATATATAAACAACAAACAGTTTTTGAAAATAATGAAATAAGTGCAACACCTCGATCAGAAAGGAAAATGAAGAAACCAGAAAATTATTCAGCAATATTAGCTAGGGCATTATCTGAAAGACCCCTTACATATTTACCTACTATTGAAAGAGTTTGTTATGAA…	1953	877	0.238827
PF3D7_1328300	PF3D7_1328300-e1o3	ATGTCGCTAAAAAACAAAGTGCAAGTGAATGATTTAAATAAGACAATTTTTAAAGAAAATTACAAAATGAAAAGGAGTACCAAAGAAGTAGAACTAATGGAAACTATAGAAAATTTGAGTGATGATATAGGATCCAATAATTTTTCTTATGATAGTAATGACAGCTCAAAAATACATAATAGGAAAAATAATGATAAAAGTATTGATATGAACAAAAAAGATAATATAAAAAATAATAATAAACAAAAAAATGCTCCTAATTATAATAAAAACAAACAAGAGTATTATTCCAATGTACCTCAAATATATGAAATATATGATACTACACCAAAAGATGAAGGTGAATTAAGGACCTCGGATAACAATGGGGGGGAAGAAAATAGTTTTCTTGCTAATACT…	429	872.5	0.235631
PF3D7_0532300	PF3D7_0532300_e1s1	ATGAGAATCTTTAATGGATCAATTTATATTTCTCCTAGAGGAAATATGGATAATAATGATGTAAATGCTAAAGGTTGTAGAATATACTCTTTTGAAGAAGAACAGACAAAAAAGGAAAAAAGGACTAACTTATTATTAAATTCATTATTTTCTAGGAAAGCTATGATACCTTTACTTGGAATTTTATATGTGATTTTATTG	201	873	0.234641
PF3D7_0801000	PF3D7_0801000_e1s1	ATGATATTTGTTAAGAGTAAGATTTTATATTTCCTAAAATGGCCTTCTGTTGCCATAGAGGAAAATTTTAGTGGTTCCTTTAAATGTTTATTCAAAAACAAGAGGAATAAATATGTAAGGAATAATTTATCAAGATTTATTCTTTCAGTTTCTTTAATTTTGTTCTTTTTTCATTTTGTTCTATGTAGCACAATAGAA	198	871.5	0.233976
PF3D7_1113900	PF3D7_1113900_e1s1	ATGTTAAAAAAAAAAAAGGATTACGAAAATGCTGATTTAGAGGATTGCAATACCAAAGAGATAAAGGGATATTCAAAAGTAGGGAGCGAAAAAAATATAAAAAAAAAAATGACTTCTATAAAAGAGTCTAGTAGTAGGGATGAAGAAGAAGAAGATGCTAATGTAAATAAAAATATTAAAAAATTTAAAGAAGGCAATAAAAAAGACAATATTTCAAAAAATTGTAATATTGTAGAAAAGAAAAATAATAAAAGCAAAGAAGAGAAAATAAATATCAAAGAAGCTATTATTAAAAATGTAAAGGTACCAGATAATTACGAAATAAAACATTTGATTGGTAGAGGATCCTATGGATATGTATATTTAGCTTATGATAAAAATGCAAATAAAAATGTGGCT…	1524	872	0.233229
PF3D7_1014300	PF3D7_1014300_e1s1	ATGGACACAGGAAAATTGAATGAACCAAAAGAATTAATTGAAATAAATAAAATAAATAATATTTTTTTATATCCTTTTTCTTTTTTTAACCTTATAAATCATCATATTTTTGTTTTACATGTATATCGTATGATGCATATATTATCATATAATATAATGGATCTCAAGGATGACAAATATGATAAAAAAGAAATAATAAACCCAAAAAGAATTGTATACAACAAATATATTATGAGGATAAAACAAAATATGTACAACTACAAAATGAAAAAGGAAGGATTCAAATATATTCCTACTAATAATATTTGTTTTTTACTACATATTCGTGACCATATAAAAATCTCTATTCATTTAAAAAGAAAAAATATATATACAATTAATAAATATTTGAATAATATA…	2328	871.5	0.232279
PF3D7_1360000	PF3D7_1360000	ATGAATGTATCAAGGGTATTATTAAATAACTCTAAAATATTAAAGAGGAATATTGAATTTAAAGAAATATTTACACCTAGATGGTTTTTAGAATGTCCTAATTATAGTCGCATGCCATTATGGAGAAGATTTTTTGAAGGACAGTATACAAATGGATCTTTTTTATTTTTTGGAAATGCATGGACATCAATGTTTGCTTTTGCATTTATGTTATGGTATTCAAGAATTTTTGATCCTCCCCCTTTAGAAAGAATAGATAAATACTGGTTAAATTCACCGAAATTTCGTATTTTATCTGCTTTTTATAATCAAGGTAAAAGACCAGGGGTTAAAATATCTTTGATGACTTACGAAGCAAGATATTTTTACAGAGGTATGGATCATCCATTTACTATAAAT…	531	870.5	0.232105
PF3D7_0603600	PF3D7_0603600_e2o3-s1	ATCATAAAAGATTTCATTATTGATAATGAAAAACCTTTAGATGAAAATGGTAAGAATAGTGTAGATATAATAAAAAGTTTATCCCATGAAGAAATAAATATTATGGACATTTTTAGGTTGTATTCATTTTATGATTACTATCGCAAATATAAGAAAAGAAAAGTAAAAAAAATAAAAAATAAGGATACGAGCAGAAATAGAAAGGGAAGTAATAATATGATAAGCAACAAAATGAAGAAAATACACATATTAAGTGAAGATGATAATAAGCGGAATATTAATGTAGATAAAAGAAAAGGTCATAATATGGATAATAATAAAAATATAGCTTCTCAGAGTTGTGAATGTAATTCTAATGGATATAGTAGTTTAAATAGTTCTGATATAGAACATTTATTT…	1500	869.5	0.230718
PF3D7_1143700	PF3D7_1143700-S2_C	ATGCTCGAGTATAACGATAAGATTGTCATCTACAGCAAGAACGGCCTGCTGGACGACAACAACATCAACCGCGACAAGATCAACTACCTGTGTAACAACAACAAGAACGTCCTCAGCTTCGTGAATAAGACCTACGTGAAGAACTTCGAGTGCCTGTTCTACCTGTGCCTCTACAACGAGAAGAACCGCATCCACAACATCTCTATCAACCTGATCCGCAACATCGAGAACAACATCTTCACGATCTACAAGTACATCCACATCTGCAACATCAACACCAAGGAGCTGCTGAACAGCCTGTCCCTGTACTACCTGGTCATCATCTTCATCTACATCAAGAACAACCTTTACAACAAGGAAAAGATCCACTTGTTGAAGAGCTTTATCCAGTTCCTTATC…	1202	944.5	0.230519
PF3D7_0705800	PF3D7_0705800	ATGATTGGTATTATGAACATCTTCCTGCTTTTCTTCGTGTTCATCTCATACATTTACGTAAACGGTCAGTTCTGCAAGTTTAACAAGGAGTTCATCAAGGAGCGCCACAACGACTTCCGCCTTAAACACAAGGCTAAGCCGTTACAGTGGAGTAAGAAGCTGGAAGAAATCGCCACGTATGAGGCCAACCTGATTCGCGACAACTCCGACTGCATCGTAAGCTCGAAACAGGTCGACACCAATTACTTCAGCTTCTTCAAGAACGAGAACATCGAGGCGAGCGTGGACACCTGGTACGAAGGTATCAACGACTACGATTTCGAACTGGGCTGCATCAAGCGTAACGACAACATCTTCGAGTTCACCCGTATCATCTGGAAGAGCTCGGAAAATCTCGGT…	579	930	0.22995
PF3D7_1455800	PF3D7_1455800_e2s2	TTGGACAATAAAATGAATAATGTTAATGATAAATTTGATAATAACGATTATACGTATGTTGACTCTTCTACTGCTGATGCTATTAACGATTTGATAACTATAGTAAATAAGCAAGTTGGTAGCACAGATACAACTTTTTTAGCATTAATAAATAAACAATCAATAAAAATTATTTCAAACGCAAGGAGATATCTAAAACCAACAGAAATATTTGAAAAAAATATAGAACTTTTATCTAATGAAACACTAAAAGATGTAGAAAAAGTATTCAATTTGATAAAAGTATTATCATCAAAAATTAATTCCGAGTTGGAGAAGAAAAAATATAAATTAGAAATTTTAGTAGATGAAAGATTAAGACAAAAGGAATTTGAATCCTGGAAATTAGATAATATAGAT…	2253	871.5	0.228958
PF3D7_1201000	PF3D7_1201000_e2s1	AATAATGAATGTTCTGAAGACGGTTTATTTTCTAGTCATTATTTGAATTCAAGATTTTCGAGAATATTATCTTCAGCTAATAATGGAAATGAATATGATATTTTAGATTTAGGTATACCCTCAGTATTTAGTGTATTTTCCTTAAGTAAAGAAGAAATGATGACCTTATTAAAAGATGTATATGGGAAAACAAAGAAAGTTAATTTGAGTGATGAAGAAAAAATAATTAGAGATATAAAAAAATATGGAATGTCTTGTAACTATAGTGCTATACCTTATATAGATGAATTTGGTTTAGTTGTTTATAACAAAATTGATAACGAATTAGATGCTGATTTTAATGATTTAGATGAATTATCAGAAACATTTAAAGATGATGCTTATAATCACTGGGTTAGA…	1884	870.5	0.228222
PF3D7_1117700	PF3D7_1117700_e2	CCTACTCTTGGTGTGGAAGTTCACCCCTTAAAATTTCAAACAAACTTTGGAAAAACTCAATTTAACGTATGGGATACTGCAGGACAAGAAAAGTTTGGTGGTTTAAGAGATGGATATTATATAAAAAGTGATTGTGCTATAATTATGTTTGATGTATCTTCTCGTATTACTTACAAGAACGTTCCAAATTGGTATAGAGATATTACAAGAGTGTGTGAAACAATTCCTATGGTTTTAGTTGGAAACAAAGTTGATGTTAAAGACAGACAAGTAAAATCAAGGCAAATTCAATTTCACAGAAAAAGGAATTTACAATACTACGATCTATCTGCAAGATCAAATTACAATTTCGAAAAACCTTTCTTATGGTTAGCTAGGAGATTGTCCAACCAACCAAAT…	525	920.5	0.226805
PF3D7_0903800	PF3D7_0903800-S1	ATGTACAACTTCTTCCTGAGCATTATCTGCATCTTCTTTATCCCGTACTTCTGCCGTGCGAGTTTTAAAGAGTACCTGAGCAACAAGAAGATTTTCTTGAAGTACAACGGCACGTACTGCCTGTATCCAGAGAACGTAATCGAGAACGACATCATCGAGATTGCGACGGACGAGTGCGACAAGGTTGCTCACGAGTACGAAAACAAGATCGTATGGTTCAGCTTCGACAACGGCCGTCTCCGTTCTAATAATGGGATGTGTCTGAAGACCTATAAGAACATCCTGGTCCTGAGCACGTGCTCTCCGAACAAGAACGAGAAAAGTGAGATGTGGAAAATTGACGAGGAGACGCACCTGAAGAACGAGAATAATAACTGCGCACAGATTGCGGGTAACAAG…	1530	868.5	0.226762
PF3D7_1247800	PF3D7_1247800_e2s1	AGTATAAGAAATTATCAAAGATTTTTGGAGAATGAATATGGGAACTTAGACATGATGATTGTGAACTTAACAATGGAAAAAGTAAAAATAATTAATCAAGAAAAGCCAAGAGATAAATGGACATATCTTGCTGTGAGAGATTATGAAAGGAATGAAATTATTGGTCATTGG	171	866.5	0.225689
PF3D7_1472200	PF3D7_1472200_e1s3	GGTTTAACCGAAGCGGCTAATGTACTTTATATTAATAATAGTATTCTTTATAATAATAATATATTTTTTAATAATAATTTACTTTATAATAATAATATTCTTATGAGTGAAAAGAATACCGATTATCCTTTTTTTCATAATGAAGATATTGTTGGTACAAATAAATCAGCAACTAATTTATTAATACAAGAGAAATTATCAAGCTATAATATTAATGTCAGGGAAAAAAAAAAAAAAAAAAATAAATGGAATAAAGATAAAATAGAAAAATTATTGTTAGTAGATAATGATACATTTGTTAATAAATATTCTTTTAACTGTGCCCTTAGTGCTAGTGGTGTTGTTTTGAAAGCAGTAGATTATGTACATAAACAAAAGAAAATCGTGAATTGTGGATAT…	2268	939.5	0.225579
PF3D7_1120700	PF3D7_1120700-S1	ATGTGGATCGAGAAGGACATCAAGAACTCGACCCACGGCGGTTGTCTGTCAAAACAAGTAAATAATGATATTGAAACTTTAAAAAAAAACAATACTTTTATCTATAACAACTCACGATTTGTAAATGTACACTCTCAATTAAAAAATAAAAATGATAATAAAATTAAAAAATACAATACAAATGATGAATGTATTGAATATGTAGAATCAAACGAGCAGGAAATCAACGGTATTTGCACCAGTTCCTTGATACGCATTCCGAAAAACGTCCGTAAAAATATCTCTGAAAAATATTTTAAAGATATGAAGAACATCCCTACGACGAATAAAATTAACCACCTGAACAACAACAACAATAACAACAATAATAATAACAACAAAAACGACAAAGAGAAACCG…	1233	928	0.224434
PF3D7_0812100	PF3D7_0812100_e1s1	ATGCTTGATGTGTTTAGAGAATTAAATAATTATACTAACTTTTTACCGAAAAATATCAAGGCAAATGTAAATAAAGAAAAATATGAAATACTTAGTGAAATAAAAAGAATAGTATTTTTAAAAAAAAGAAATTCCTATAATGTTGCATCAGTCATAAAACTATTTAATACATATGAGGTAATAAATACGAAAAAGTACAAGTCGTTTCATTTTTACATTTTTATGATTCGATATTTATGGAATTCATTACAAAATAAAAGTATCAGCCCAAATTTGAAATGTTATATTTGTCAATGTATTTCTAGTATATTTAAGAATATTAAAAAGTATATTTTGTATGATTTCTTTTTTGAATATGATAGAAAATTAATTTTGAAAGAAGAGAATGGAAAAAATGAA…	2691	865.5	0.22326
PF3D7_0529400	PF3D7_0529400_e2s1	GATATGGAAAAACATGAAGATGTGAGGAGCTATCAAAATAGTTACCCTTATGAAACTCAAAATGGTACTATTAAAATTATATTGATATATATGTATATATATATATGTATGTATATGTATGTATATATGTATATATATGTATGTATGTATATATAC	156	937.5	0.22279
PF3D7_1462300	PF3D7_1462300_e1s1	ATGAATAAACTATTTTTTTTATGTTTCCTTGTGATAATTATATATTCATTAAGTATTTATTATTGTAATGATAACATTTTAGAAAATGCAAATAATGACGATTCTACAAAAGATATAAATAATATTAATAAAAATTCATCGAATAAATCAAAGAGCGAGAAAACAAGTAACTACAATAATGATCAATATAATATAGACGACGCATATAACGAAGACGAAGAGAATGATGAAGAAGAAGGAGATGATGATGAAAATGATCATTTCGAAGTCCCAATAAATTGTAGCGGTGGTAATTGCTTTGATTCTATGGATGATATAAATAAAATAATAGATAATAAAAAAAAGAAAATGAAATATCGAAGAAGGAGAGGGAAAGCTATACAAATTATAAAACCAAAT…	2067	865	0.221653
PF3D7_0729900	PF3D7_0729900_e1s3	AATTCTAAAGATGCTAAAATAATTCAAAGAAATGTTAACAAAATGTTTGCTGGTATAAATTCGTTTATATTAAAAGAAAATACAAATGATATTATATTAGGTATGTCTTCACGAGAAGGTGAAGAGGTTTTATTTTTGGAAGCATTAAATATTAGTTCATTTAATACATTAAAAGAATGGTTAATAGTTTTAGAAAAATCTATGAAAAGTAGTTTAGAATTTTATTTAGATGAAGCAGCAAAAGAAATATTAGAAATGGATATGATTGAATGCACGAAAATTGAAAATAATAAAATATTGTTATGGTCAGAAAAATATCCGAATCAAATTATATTATTATGTTTACAAATACTATGGACTACGAATATTGAAAATGAATTAATAAATTTTTCGAAAAAC…	2634	862	0.218222
PF3D7_0726400	PF3D7_0726400_e5s2	AATTTTATGAATAACAAGAAAACTATTATGATGGAATACAAAAAAGATAATAATGGGTATCATGCGAATGAAAATATATATGAACATAAATACATACAAACAAACCATTACAATGATAATAATAAGAGTGTGAATAATATACATAATTCACCTTTCAAAAATATCATATGCATCGTAGTCATAATAAGATATCTCTTATGGAATTTATATAAAAACCATATTAATAAAATTGATATGAAGAAACTTTTTTTTGAAGATAATTATAAAAAAAGTGTTGTAGAAAAGTTAGAAAAAAAAAAGTGTCAAGAAATTTTAGAGATTCTGATAAAAATTGTAGACATATCAAAAATATATTTATCCCAAATGAACTTCCAATTAATAAGAAAAGATACTTTTATT…	1563	861	0.2161
PF3D7_1346800	PF3D7_1346800_e1s1	ATGTGTATGGGAAGAATGATCAGCATTATAAATATAATATTATTCTATTTCTTCCTTTGGGTAAAAAAAAGTATTAGTGAACTATTAAGCTCAACACAATACGTATGTGATTTTTATTTTAATCCCCTGACTAATGTTAAGCCAACTGTAGTTGGGTCATCTGAAATATACGAAGAAGTTGGATGTACTATAAACAACCCTACGTTGGGTGACCATATAGTATTAATATGTCCTAAGAAAAATAATGGAGATTTTAGTAATATAGAAATAGTACCTACTAACTGTTTTGAATCTCATTTATATTCTGCTTATAAAAATGATTCCAGCGCATATCATTTAGAAAAATTAGATATCGATAAAAAGTATGCAATAAATTCATCGTTCAGTGATTTCTATTTA…	1317	860.5	0.215594
PF3D7_0607300	PF3D7_0607300	ATGTTGAAGTGCCTGGTGACCCCGCTGCTGATTTGCATTCTGACCATCAAGATCCTGTGCTTCATTAACCTCAAGAAGTTGCGTTTTAACATTATTAAGACCGAGACCATCCTTAACATGAACGAAGTGGGCGAGATTTACAGCCGCCCGGAGAACCTGAAGTACGAGAAGTTTGGGCGCCCGCAGAACGACCTGATTCTGAACGTAATCGAGAATAAGAATGAAGAGAAGAAATTCAAGAAGATCCCGCTTTGGATCATGCGTCAGGCCGGCCGTTACCTGCCGGAGTACGTAGAAATCCGCAAGAAGTACGACTTCTTCGAGATTTGTAAGTCGCCGGACCTGTCCTCATACGTGAGTATCATGCCCTACGACCGTTTTAAAACGGACATGATCGTG…	1239	916	0.215523
PF3D7_0711700	PF3D7_0711700_e1s1	ATGGCGAGGCCAGGTAGCGGTGGTGGAGGTAGTTCACAGGATGCCAAACATGTATTGGATGAAATTGGGCAACAAGTGCACGACCAAGTGGAAAAGGAAGCTAAAGAACGTAGTAATGGTGATTTGAAAGGAAATTTGACAATATCAACAATTTTTGATACGGAAACAACTGGCACCGATGATCCATGCAGCTCTGATTATACTACACGTTTTGATGCTCGCGGTGATCCGTGCAAAAAAGATGGAACAGGAAACGATGTAGAGCGTTTTTCGGTTAAACAAGGAGCAGAATGTGGTAATAGTAAAATACATGGTAATAGTAAAGGTGGAACTGGTACGGAGGTTGGCGCCTGCGCGCCGTATCGACGATTAAATTTATGTAACAAAAATCTCGAAAAT…	2655	859.5	0.213955
PF3D7_1472200	PF3D7_1472200_e1s1	ATGGATATCGTTAAGGATGAAAGAAATATTCGTTATGAATACGAATTAGATAAAATAAAAAAGAAGAAGAAGGATAACCTTTTAATTATGAATATATTGTATAATAAGATAAATTATATATGTTATATATTAAAAAGCAATCATCGAGATATATTGAATGATATAAACTTTGAGAATAGAACGGCTATAGAAATATGTTTATATTATTGTAAATCATATATATTATTTTTATTATTATTTTATCCATATTTACATAATTATATAAGAATTTTAAAAAATAATGATTTACGATTATATAAGAATTTTTATAAGTATATATTAAAAAGACGAAATAATTTGCATATCTTATTATTAAAATATCGAATACTTGAATGCATGAAATTAAAAGATAAGGATGTT…	2277	859.5	0.212837
PF3D7_1421100	PF3D7_1421100-S1	ATGAAGGATATCAAAGTCTTGCTGAAAAAGCTTCATATCAACAAGGAAAAAGAGTTCGAGAAGGACGTGCGGCTGCTGTTCGACATGAAGAAGTACATCGAGTGCCTGACCAAGCGGAGTTCGAACAACAACAACAACGACAACAATAACGACAAGACCAACTGCTGCATCATCAACAACAACTCGAACCGGCTGAACTCGGAGGACATGTTCAAAGACTCGATCAAGATCAAGGAGGACAACCTGCTGAAGATCAAGCACTCGTACAACAACCCGATCGAGTACATCGAGCGCTTATACAAAGAGCTTAAAGGCCGTACGCCGTTCGAATATGGCTATTATAAGAACGTTTTAAATAACTACAATAAATACGACTATTACAACTATATCATGAACAAC…	1317	853.5	0.203258
PF3D7_1444100	PF3D7_1444100_e9s1	TGGAATACATTTTTTATAAATATCCATATTATTATTGACAAACCTAGAATATATACAAATCCTTATTTCTTATTTAATAATAATGTTTCTATATTTCCTAAAAATAATTCTTTCGTTTTATCAAATAAATCATATCATTTTGATAGAGTTCTAATTGGGAAAAACATACACTTATTTAAAGACATAATTCAAATAGAATTAAAAGAAGAATTTGAAGAAAATATTATAAAGTTCATAAGACATTTTGAAGGTATATATACACCTAAACTAAAAATATTATCCAAATTAAAGACAAAAAATGTTGTACCAAATATAGATACTATTGAAAAGGGTAATAAAAATCAAGTCAATAATATTGATATCATAAGAAATAAGGATATCTTAAAAAATTTATATAAA…	2340	922	0.201599
PF3D7_0405300	PF3D7_0405300_e1o1-s2	AATAGTGATCAAGTTGATAAAATACATAGAGAAGAATTAGAAAAAATCGAAAAAGAAAAAATAAACAAAATGGATAAAGATGAAATAGATAAAATATATAGAGAAGAATTAGACAAAATGGATCGAGATGCAATTTATAGTATGTATATAGAAGATATAAGTAACAAAAATATAAAAGACTTAATTAAAAATGAAAAGGAAACAAATAAGGATAAAAACAAAAAAAAAGATATAGATATAAACAAAAAGAAAAAAAAAGATATAGATATAGATGTAGACATAGATAAAGATATACATAAAGATCATGTAGAAGAATTATACGGAGAAGTAAAAAACAAACTTAGCAAAGAAGAATTAGATAGAATGGACAGAGACGCATTATATAGAGTATACCTAGAA…	1500	909	0.201237
PF3D7_1218800	PF3D7_1218800_e2s1	GGTATTTCTACACATATAACTTTTGATAGTTTAATGCCTGTTGATTCTACTGGTAATAGGAATCATGCCCATGGAAAATTTTTTGCTTCATCTGGATTTGGAGGAATTGGGAACTCTGCATTGTTCAGGCAAAATTATATATATATACCACATTCTGATGAATATTTCAAGAGTGTTGATTTTTCATATACCTTTTTTATATATCTATTACAAGATGAAATATCTAGGTATAAGAAAATGAAATCAGAGCAT	252	917	0.200747
PF3D7_0808200	PF3D7_0808200_e1s1	ATGAAACGCATTAGCCCTCTAAACACCCTTTTTTATTTAAGTTTATTTTTTTCATACACATTTAAAGGGTTAAAATGCACCAGAATATATAAAATCGGAACGAAAGCGTTACCGTGTTCTGAGTGTCACGATGTATTTGATTGTACCGGGTGTTTATTCGAGGAAAAAGAATCTTCTCATGTGATACCTTTAAAATTAAACAAGAAGAATCCAAACGATCATAAAAAATTACAAAAACATCATGAGTCTCTAAAATTAGGGGACGTAAAATATTATGTAAACAGAGGAGAAGGAATTTCCGGAAGTTTAGGAACGTCGTCTGGTAATACATTAGATGATATGGATTTAATAAATGAAGAAATAAATAAAAAACGAACAAATGCACAATTAGATGAAAAA…	1719	853	0.200344
PF3D7_1311800	PF3D7_1311800_e1s2	ACCGTAACTACTCGTTTATCTCATGTAGATTTATTAAGAAGTGTTCAATTTTTAGAAGATTCCTCACCATTATCACACCCTATTAGACCAGAATCTTATGTTAGTATGGAAAACTTTTATACTACTACTGTTTATGATAAAGGTAGTGAAGTTATGAGAATGTATCTTACTATATTAGGTGAAGAATATTATAAAAAAGGTTTTGATATTTATATTAAGAAAAATGATGGAAATACTGCTACTTGTGAAGATTTTAATTATGCTATGGAACAAGCATATAAAATGAAAAAAGCAGACAATTCAGCTAACCTAAACCAATATTTATTATGGTTCTCACAAAGTGGTACTCCACATGTTAGTTTTAAATATAACTACGATGCTGAAAAGAAACAATATAGT…	1650	851	0.199235
PF3D7_1439800	PF3D7_1439800_e1	ATGAAACTTTTAAGAGTAACACCTGAAAAAAATATAGAATTTCCTCTTGTTCATTTTCAAGCAGTAACTCAAGTTGTTAAATTAGAAAATGTAAGTGATAAAAAAGTAGCTTTTAAAATAAAAACAACCGCTCCTAATAATTATTTAGTAAGACCATCATTTGGTTTAATAAGTGTAAGAGAAACAATAGAAATACAAATTATATTACAACCCTTGTCAGACAAAGATAATATATCAAACGATAAATTTCAGGTACAATGTTTAAATGTTGATGATAATACTACAGTAGATAAACAATTTTGGATAACAGTTAATAAAAATGAAATACAAGATCATAAACTTATTGTAGTTCTAAACGATGAAAATAATAGTAAATTAAATCATTCTTACATACCCTCA…	501	851	0.198642
PF3D7_0522400	PF3D7_0522400_e2	ATAATACTTAAAAATGTTCCGTTCCCTGAAAAATTTTTCGAATTAGCTGATTTACCCTTGGAAATTATTTATTCTAATATTAAAAATGTGCGCATAAAATTTTTGTGGTCTTCTATATTTTCCAGTAATATCAGTCCAATAAATATTTATGCAAACGATATATTTCTGGTGGTAAAATTTTCGTATCCAAGTATTTGGAACACCAATAAAACATTGAATACTCAATATGAAGTTAAAAAAAAAAAGTTAAGAAAATGGGATAGTGTTAATATATCTAAAGAAAAAAAGGAAGAGAATTTTTTAAAAGCTCTCCCTATAAAATTAATTAATTCTTTAAGAATATTTGCAGAAAATATTAAGATAATATTTTTTGATAATCATATACATACAAAACCATTT…	753	850.5	0.197481
PF3D7_1365700	PF3D7_1365700-e3o3	TTAGAAAACCATTGGACGAATTTGATAATTCTTTTTGTCGGATTTCTCATTGGAGTAATTGCAATTGTATACATTTCAGTAATTACTAAAAGAAGATTAAATAATTTAAATATAATGAATGCATCCTTATCAACAACCAATGCAGATATTGAA	153	906.5	0.197472
PF3D7_0825800	PF3D7_0825800	ATGAAGGGCCGTCAGAGTCTGTCATTTCTGTTATTATCCGTGCCGTACTTCTTCTTATTCTTATGGAACGAAGACATTAAATGCCAGTCTCTGCTTCCGGTGTCGTACGCCTCGCACCAGATGTACAGTTTCGACAAGCTGACGCCCCACGAGATCAAATCAGATCTGAAGAAGACATTCGGGAACTTCATCAGCTCCAAAATTCAGGTGTTGAAGAACAAGTTTAAGCTGTACGACATTAAGAACCGCGAAAAGTACAACAACGAGGAAGGGAACGACTCAGACCTGATTGGCGACGCGTACATTAGTAGCCTGGAAGACGAAATCAAGCACCTGTTGGAGCAGGCCGAGAACAAGCGCATGCTGAGCAAGAAGATTAAGTCGTCATACGAACGTGCC…	1338	850	0.19681
PF3D7_1306500	PF3D7_1306500_e1s1	ATGATAAGAAAAAGGTCCATATTATACATAATAACATATATATGTACAAATATATACCATTGCATAAAAAATGAAATAAACTACGAATATAATTCTGAACTAAATAAAATAAAAAACCCGTTTCTCATAGATATAGAAAATAAAGAAGAATGTAATTTTAAATATGATAATTTAAAAACGTTGTTCAAGTATATATATTTAATCGAGTGCTCCACCAATAGTAATAAATTACAACTACATTTTATAAATATAGCAAAAAAGAATAATAAAAAAAAAGATATATATTATTTCTATAACGAAAATGATAAAAAAATAAAGAGTGATATTATACAATTTGATGTAGAAAAAAATGATAAAAAGGTAAATTATAAAGTATGCCCAACATTTGATAAACATAAG…	2409	902	0.195548
PF3D7_1402200	PF3D7_1402200	ATGTATTCAGGATTTATAAGATTCAGTCAGGCAAAATGCGCAGGGAATCATATATATTTAGGAAAGTGGCATGATTTTAATCAATGGAAATATCTGGCACCCAGGAATTTATTAAATATCATATATCCGGTAGAAAAAACAAATAGTATACATATAGGTAAAGAAGAAAATGATATCTTTACTTATTTAAATTCATCTTATCATGGAAATATTATAACCATTGATGATATAAATACTAGTCATTCTAAAAATAATCAAAAAATTAAATTAAGAGGTAGTGCTTTTCATGGACCTGAAAGAACGGATGTTTTTCGACTAACCTTATATAATAGATTAAAACAAAAACAACCACAAAGAATTGTACCAAGTATTGATCAAATGAAAGATGCAAATAAGTTA…	564	848	0.1946
PF3D7_1360500	PF3D7_1360500_e12	TCGAGAAGAAAATATTTTTTGAACAATAATATTATACTTTTAACAATAATTGAAGCCATACTAATTTCCCTTACTTCATATTATATATTACGATTAAATGTATTTCATTTGATTACTCATCGTGAATTTACTTTTCATATATTTATTTTAAATGTTTTTATAACAACCGAAAAAATTCTTTTACTTTCCAAAACATGGCATATATATTTTTTTATTATGGCAGTTCTTATTATAGGTATATTGCTTATATATGTAAATATATTTACTTTAGTAGATTGTATAAAAAATGGAAAATGTGAATTTAGTCTTTTTCAAATGGAAAATATATATTTCTGGACATCTCTCTTTCCTATTTTATATATTAATTTTATCTTTGATAAGCTTATGAAATATATAAAG…	405	849	0.194405
PF3D7_1246800	PF3D7_1246800	ATGGATATATTAAATAAAATAATAAAGGATATAATATATAAGATAAAAATATATCATGTAAAATATGGAATACATTTGAACGATTTTCACAACTTGTTATTTGTGATAACACTATTATTTGGCTTAGTATTTTTGTTATATCTTTTATTAATATTGTTCAATATATTTTTTAAAAAATCCAAGGCAAATAATGTTGTATTATTATTAGGACCATGTGATAGTGGGAAGACCACATTTTTATTCAAATTAAAAACTGATAAGTTGTGTAGAACCGTCCCCTCTATGAAAGAAAATATTGCATTTATATTTTTAAAAAATAAGAAGAAACAAAAGTGTATACGTTTTGTTGATTTCCCAGGACATCCTAAACTTTCATATTCACTAAATAAATATTTTAAT…	783	901.5	0.194298
PF3D7_1310600	PF3D7_1310600_C	ATGCTCGAGATGGGTTGCAGCAGCAGTACGGAGCGTCTGACCAGTACTAAGAACATCAACATCGTGACATCCCCGGCCCAGCAGCAGAAGAAGAACGCCCAGGACACGAAGGTTAAGATTGTACTGCTGGGCGATTCAGGCGTCGGCAAGAGCAGCATCGCACTGTACCTGTGCCACGGCCGTTTCAGCGAGAAGCACCAGGTGACAATTGGAGCTGCGTTCCTGCACCACAACATCGAGCTGAAGAACGGCGCCACGATGAAGCTCCATATCTGGGACACGGGCGGCCAGGAGCGTTTCCGCAGCATGGCCCCGTTGTACTACCGCGATGCATACGGCGCCGTCGTTGTGTACGATAGCAACAACGTGGAGTCTTTCGACTCACTGAAGTATTGGATT…	704	848	0.194046
PF3D7_1444100	PF3D7_1444100_e5s1	GGATTAAGCACTTATACAAAAATAAAAAGTAAAGGTATTATAGCCGATGTTTTTATAAAAGATAAAGAAATTATAGCTCATGACATATACATAAACAAATCTAAAGAAATCAATATTTTCCTTAAAAACTTATCATTCTTCTTATTGTCGTACAAGGTCATAAAATACCAAGTCTATGAATATAAATAT	189	847.5	0.193524
PF3D7_0804500	PF3D7_0804500_e1s1	ATGGATCGTTCCTGTAAGGAGTGTAATGTGCGAATCTCGCGGGATTCTGCACATGATGAATACGATAATAAAGATTTGGTACATATATACAGAAAACCCATGATTAATAAAAGCGTTTTTTTAAAAAGGTCCGAAAAAAAGTACCATCCCATAAATAAGCATGTAATAAACTCATATAATATTTTTCCGTATGGAGGAATTTATTATCATGATATTATTATAAAGGATGTGTTAAAGTTTTTTTATAAAAACAATGACAAAAGAAATAGTTATTCTAATTATTTATTACATCCTGAGAGAGAGAGTTCTAATTATGTTTATTTGGGTGCTGGGATTATGAGAGAAGAACAAAATAAAAAGAATAAGGAAAAAAATAAAATGGTTTTTATATTTTTTATT…	2748	900.5	0.192993
PF3D7_1462600	PF3D7_1462600-e2o2	GCTCCTTCTATGTCTTATTTGATTACCCTAGCATGTATTTTCGTTTGCAGTGGTATATTTTTTTTTTCCATCATTGGTTTAGTGTTATATGTATTTAGTTTAATATTAATATTTTTTTTGATATTCTCACAATGCTTCTGTAGAAGGCTTTTTAAACTGTTCATGGGATTTATATACACATTTTTATTTTTGTTTTCTATATTGATTGCATATATATTAATTGAAGATTTTAATGAGGGCTCCAAAGTATATAATGAGTACAAAAAGAATGATTACAATGACTTTTATTGGGTCTTATTAAACAAAAGAACTTATGAATATTTCAAAAGTTTTATTTTGTTTTCGTATGGACAAATGTTCTTAGTATGTATAGCTTTGTGTGCATTTATGATTATATAT…	468	904	0.192315
PF3D7_0922300	PF3D7_0922300	ATGCTTAAGAAGGTCATACTTCTTACATTTTATTTTTTCTGTTGTTATAAATGTGAAAAGTTTAAGGATTCCTCTTTTCAATCACAAAATAATAGATTTTTGCAAAGCAAAATTAATGTTCTTACATGGCTAACTAATGTATTGTACCCTTCTGAGAACCCTAAATATTTTAAAAAACACTTAAATTATAGAGGCTGTCGTGAATATTTCTTGAAACCATCCTATGATCCCATTAATTTGAATGACGGGTGGTTACAAAGTGATAATTGGATTATTCATAATGAGGAAGCTATCATAGAATATACGGCAAAAGATAGCTGTCGGGAACCTAATCATCCATTTCCTTTCGGATGGTTAGACAATAGAATGTCAACAAGAACGTCTTTAATAAAGAAAGAC…	945	847.5	0.192141
PF3D7_1362000	PF3D7_1362000	ATGGCAATATCGAGGAGCAAAATAAGATATTTATTTCCCAACGCTACATTACAGTCATATTATCCCAATTCTGAAATGTTTAAAGTTCCTAAGGCTGGAAGTGCACCAAGAATATATAATGGCTTAGATCCTCGAAAGGTACATAGTTATCCATGGATAAATATTTTTAAAACACGAAGAATAAAAGAAACAGGTTATCAATATGGAAATTGGGCAGGTCCTTCTATACATTCAATGACACTTGATGAATTAGCTACCTTTTTTAGTAATAAAGATCATTTCAAATATTTTTCTATTTTTCAATTAATTAAAGCAACGTATGGACAATTCCAATTTTTGTTTCTTTTCTTGGGTTCCATAGTTCTAACTATATCACCCATTTTATTGTTCACCTTATAT…	597	902	0.191882
PF3D7_1245100	PF3D7_1245100_e2s1	AGTGAAGTCTATCCTCAAAAAAGCGTAAATCTTGGTAATAAAATAAAAGTGAGGAGTAAAACTATGAACAGTAAAATAAAAGTTGTGGTGAGGAAGAGACCACTGAGCGAATTAGAAAAGAAGAAAAAAGATAGTGATATAATTACAGTAAAAAACAATTGTACGCTTTATATAGATGAACCAAGATATAAAGTGGATATGACAAAATATATAGAAAGGCATGAATTTATTGTAGATAAAGTTTTTGATGATACGGTTGATAATTTCACAGTATATGAGAATACCATAAAACCATTAATAATAGATTTATATGAGAATGGTTGTGTATGTTCTTGTTTTGCTTATGGGCAAACAGGTAGCGGGAAGACTTATACGATGTTAGGTTCACAACCGTATGGA…	1995	846.5	0.191683
PF3D7_1252700	PF3D7_1252700	ATGTCGCTGTTCATTGAGTCTAGCTTCATCCTGCCAAAGGGAATCATCGATTCCTACATTAAATTCAAGACCTGGAACTCATGTTCCTACAGCGACAAAGAGAAGAAAGCCTCTCAGGCGAACATTTGGACGCCGGTGTTCTCGACCCGCTTCGCAATTCCGATCATCGGCATTATTTACGCCCTTCTGTGGAACGGCGACGCGACGTTCGGTTACTCGGCCTTAGACATGTCACTCGACGAGAAGTACAGCCGTACTCTGTTCGAGACAAACAACGGCAACAACGGATATGTCAGCAGCCTGACCAACAAAATCCTCAACAACATGAACAAGGGCCCGAAGAAAGAGGTGGAAGAGAAGAACGCGGAGAAAATCCTGGGCTTCGACGACAAGAACATC…	1350	846	0.190486
PF3D7_0522400	PF3D7_0522400_e4s3	ACATACTTAAATAGATATAATAAGGATGGTGATTACTCAGTAAAAATGATTTATCCTTATAGCTCTATTTATTACACATTAAGACATAACAATGAAATTGAATCATCAAAAATTGCTTTAAAAATTGTAGGAGTACAAAAAAGTTCCTGGTGTATAAATACAATAAACTCTTTTATTGACAACGTTGTTATATTACCATATAGAATATATGGAGATAATTTATTATCACGTAAGACTAAAAGAAATACTAAAAATGAAATATTTAAAGATGATATGTCGCAAATGTCATATCAAATAAATGATTCGTCTTCTGATAAATTAAGTTCCAAAAGTGATTCTATTAATTCTAATAATATGGAACGTTATATAAACGATGATGAGGAAAATGATAATTTATTC…	2658	845.5	0.190292
PF3D7_1458000	PF3D7_1458000	ATGGTTGCCATAAAAGAAATGAAAGAATTTGCATTTGCTAGACCAAGTTTAGTTGAGACATTGAATAAGAAAAAGAAATTTTTAAAAAAAAAGGAAAAGAGAACATTCGTTTTATCTATCTATGCATTTATTACTTTCATAATATTTTGTATAGGAATATTATACTTTACAAATAAATCATCCGCACATAACAATAATAATAATAAAAATGAACATAGTTTAAAAAAAGAAGAAATTGAATTACTTCGCGTTCTTTTAGAAAAATATAAAAAGCAAAAGGATGGTATCTTGAATGAATCCTCCAATGAAGAAGATGAAGAAAAATACACCTTAAACTCAGAAACTTATAATAATAAAAATAATGTTAGTAATATTAAGAATGATAGTATAAAATCTAAA…	1707	844.5	0.186101
PF3D7_0109850	PF3D7_0109850	ATGATAAACATCCTGGTAATCCTGATCATCACGATCACCCAGGTCAAGAAAAAGATCTTTCTATGTTCATGTTTTACCTACATCTGGATACTTTTAACAGTGCTGTGCAACATATTAATCGTTTCGTATATGTACCACGAAAAAAACAAGAAGAAAACCAAGAAGGAAAAAAATATTGAAAAGGAAGAGAAGAAGTACAAGAATAAGAATATCTACACAATCCTTCATCCGTTCATCAAAATTGGTAAATATTACGAAAACGAGAAAGAAACGATTATGTTCGACAAAAATAAGCGGAACTTTTTTTCCCTTTACCAGAATAACAAGATTAGTATCGTGAAGCTCTTTGGCTACATATATATTAACAATATAATACCCTACTTATTCGTTCCGTTTTTC…	1788	911.5	0.18449
PF3D7_1016300	PF3D7_1016300_e2s1	AATGCTTATATATGTGGAGACAAATACGAAAAGGCTGTAGATTATGGTTTTAGAGAAAGCAGAATTTTAGCTGAAGGAGAAGATACGTGTGCACGAAAAGAAAAGACTACATTAAGAAAAAGTAAGCAGAAAACATCTACACGCACAGTTGCTACTCAAACAAAGAAAGATGAAGAAAATAAATCAGTTGTTACCGAAGAACAAAAAGTAGAAAGTGATTCCGAAAAACAAAAAAGAACCAAAAAAGTAGTAAAAAAGCAAATTAATATAGGAGATACAGAAAATCAAAAAGAAGGAAAAAACGTTAAAAAAGTTATAAAGAAAGAAAAGAAAAAAGAAGAATCTGGAAAACCAGAAGAAAATAAACATGCAAACGAAGCTTCAAAAAAACAGGAACCT…	2283	911	0.183674
PF3D7_0505700	PF3D7_0505700	ATGAAATTAACTTGTTACTGTATTATGTTTTTATTTATTCATATAATAAAATATGTTAGTTGTGAAGAGTATAAAATAAACAAAGAAGAAGAAAATGGAAAACATAATAAGGAAGAAATAAAAAATGAAAAGTACGATAATAATAATTATGAAAATAAGAATAATGAGAATAATAAAAATATTGATAGTAACAATAGAGAAGACCATATAATGAAATTACTTCCAATTTATAAAGACAAAGATAATGATATCATCGATGAAAATATAAACAATAAAATAAATTATTATGAAAAGGATAATATAAAACAAGAGATAAAACATAATACTGAAAATGATAATAATAATAATAATAATATTTTTATACAAGAAAAAGATAATATACAACTTTATGTTGATAAA…	2772	899	0.181068
PF3D7_1451900	PF3D7_1451900_e1s1	ATGAAACATAAATCACATTTAAAACAAAAAAATAAACAATTTAAAAAGATAAAAAATCAGAAGAAGAAGAAGAAGAGTATAAAAAATATCCAAAAAAAAAAAAATAAAAATGATATTAACGAAAAATATAGTAATATATTACAAAGGAAGGTTCAATCATATTATAGCAAAAGTGATCAATTAAAAAATGAGAGAGAAGAAAAAGCTAAACATATACCTTTTTATAATTGCTTGAATATATGTTTATTAGTGTTCCATGAAGATGTTGATATACTTTCGTTTAAGAAGGAATTTATAAAATATTTATGTGAAGAAAATGACGAACATATTGATATAGATAATATAAAATTATATGATATATACACTGTACATTCAAATGATAAAAAAAAAAAGAAAAGA…	1575	907.5	0.178626
PF3D7_0307900	PF3D7_0307900_e3o3-s5	GAATATATAAATGTAGATGATTCATCATTTAAAAAATTGGAACAAATTAATAACTTTGATACTTATAATAATAATAATAATAATAATATACCAATTGAAAATGAAGGATTTTGTTTAGTCTCCTTAAACGATGAAGGCCAATTTATTAAAGGAGATAAAAGTTGTTGTATTAAATATGATAATAAATATTATATATTTCAAAATAAAGAAAAAATGCAAACATTTATAAATAATTATAATGATTATCTAAATAATCAAAATATTTTCGATATCATTCTAAATCAATTAAAAAATAAAAATGATCTTAATACATTAATATATTTAAAAACATATTTATATGAAATTTTATGTCATGCTCTATATGAATTAGGAAAACACAGACCTATTTATCCTGGATTA…	720	838.5	0.178338
PF3D7_1143000	PF3D7_1143000	ATGCCTATTTTATTTTATATTTTTTATATTTTCTGTTTTCCCCTTATAAATCTTTCAGAAAGAACGTCAAAAATAAATTATCATAATAATTATCGGTTCGTATCTAGTGAGGATAAAAGCATGATGAATAATTTTTTTATAAAATTAAATAAAATTAAAAACTTTCCAAATTATAATACTCTTTGGAAAATTAAAAAGTGTGGATATTTTTTCTTATCTTATAAAAATGGGAAAAACAACTGGAATAGAATTTCTGTTAATACTATAACAAGTAGTAATAATAATGAGAAAATAACTGATGATGTGTTAGATGGAATTTCATTTAGTATCCGAGATAATACACATATATTCAAAAACGAGACCAAGGATATTCCTATTGTATTATTGCATGGATGTTAT…	1146	838.5	0.177599
PF3D7_0528200	PF3D7_0528200_e2s1	GTGGGTGATGTGAACGATTTAGAAAAGAACTTAGAATTATTAAACGAAGGATGCGATAAAGAAATTGCTTTGATAGAAAACGAATGTACTAATGGGAATCGTGGTGTTATAAATAATTATTTGGAAAGTGTGGAATTAGAAATTGATGAATTTCAAGAAGCAATGAATGAATATAAAATAGATCAGATGAATAGGATTGGAAGTAATTTAGAAAAGAAAAGTATTGTAGGTTTAAGAGATTGGTGTAATACATATTTATTAGATAAGAATAAGATGTATACTTTTAGTGATAATATAGATGATAAGATATTAAAATTAAGTAGATATTATTATCAGAAGAAAGATTATGTAAAAAGTAAACAATATTTATTATTATATATTTTAAATATATCTGAAATG…	1452	839	0.176589
PF3D7_0730900	PF3D7_0730900_e2s1	GATACGTATTGTAAGGAAGGCAATAAGGAAGATAATGTAGAAGGGTTATTTAGTATAAGACCAAGCAGATCATTAACTGAACGTAAACAAAGAAATAATGGTAAACCTTCTGTATATGTTAATAATGGTGAAGAAGAATATTATGAAGAAGTATATTCAGAGGAGGAACATTCCCCAGATGAATATGCTGATGGTGAATATTATGATGATGATGGAAATTACGAAGAAGTAAATTATGATGAAGAATATTATGAGGAAGAAGGTGAGAAGTCAAAAAACGTTTTAGAAAAATATAATGATTATGCATCAAAAAGCCACGGTATGTCATCAGTGCTAAAATCTGTTATCAGTGGTTTTACTGAAACATGTAACGATGTAAAAGAAGCAGTGAAACCTAAT…	2085	906.5	0.176002
PF3D7_0323100	PF3D7_0323100_e1o1-s3	GATACATTATTATCAAACAATGGTATATTTATAATATATTTTACGAGTGCCATCATATTATATAAAAAGGAAGAATTATTAAATATAGCTAATAAAAAAAGAAAGGATCAAGGATATAATAATTTATATTCAGAAACACATTATATATTTCAAAATATGAAATGGAAAGATATAAATGTTGAAAATATTATAAAGAAAACATATTATTATATGAATTATAAGATTCCTTTTGATACCTTTCTAAACAAAATAAAAAACAAAATTTCCTTTCCCCCATTTTCACCCATATATAGTTATCCTTTCATTCTTCATCATTTTGATTATGAAACCAAACAAGAGGAATTGAAAAATAGGACAGTAGAGAAGTCTATTTTGAATTTTTATAATTATAAAAATGGA…	1500	893.5	0.1757
PF3D7_0505500	PF3D7_0505500_e1s2	TATTTAGTATGTTTTTACTTTGATGAAATTGAAAATATGACAAATGTTAATAATAATATAAAAGATAATGATGATGATCATAATAATATAAAAGATAATGATGATGATCATAATAATATAAAAGATAATAATGATGATCATAATAATATAAAAGATAATAATAATTATACCTTTTCCCAATATGATAACAAAAACAAATGCAACTTCGGTTTTGTTGTTAGCGATATCGCTACTTCTTATATTGCCGTTGGATATTGTAATGATGACGAATCAAGAATTGTTCTAAGAACTATTTTGGCTCAATTATGTCCTGCTGAAATTTTATATAGCTCTAAAAATATAAATAAAGAAGTTTTATCAATATTTAAAAATATTCCTACTTCTCCAGAATTAACTTGT…	1644	837	0.17504
PF3D7_0423500	PF3D7_0423500-e2o2	CTAATTATGGTGTTTTCCGGATTCGGAGCCTTTTTTTCCATCTTATTATTGGGAGCCATCGTTTGTGCAACTGTGTGGGCCTTTTCCTTCGAGCCTTTATTGGAGAAATGGTCCCCCGAATTACATAGCCGAGATATTAATGCTGATGTATTACCAGAAATAAAACATGAAGATGAACAATGTGCATATAATGAGGAGAATATATATGAACCATATAGTGTAAATCCTGATAATGTAGAATATGGCGAAGAGATGGTAGCAAAGAATATGAATGAAAAATATATTGATGGAAATACTTATGATTCGAATATATATTCAGCAAATAATGGAATTCCAACAACTTATGATTATACTCAAATCGAAGGTCAATTAAAAAAGAATGTTGAAATGGGAGTAACA…	429	889.5	0.174668
PF3D7_1420700	PF3D7_1420700_e2	AAATGTTCACAAGGAAACCTGTATGTGTTACATTGTGAAGTTCAATGTTTGAATGGGAATAACGAGATAATACATAAAAGATGTAATGACGACATAGAAAAGAAATGTAATGGTAATAATAAATGCATATATTTTTTTGAATATGAACTTCGAAAAAAAACACAATCCTTTCGAAATAAGAATAGTATAGAAATAAGTGAATGTGTAGAATCGGAACAGAACGAAGTAAAAACATCTACGACTTGTTTATTAAGTAATAGTTTTATTTTAGATGAAGCATTTATTCAATATTTCTTTTTTATTAAGAATAAGAATGAGGAACCTGTTATTTGTAAAGATGGTAATATAAATATTAAAAGTGCACTTTTACATTCTCCCTTTTGTGAAATAAAATTAAAA…	2796	894.5	0.172741
PF3D7_1318800	PF3D7_1318800	ATGTCACAATTTCGTGATACGTTTACTAAAGATAGTAAAAAAGAGCCATTATTGAGTTATGACGACTCGGCATTTATTTTTTTCGCAGGAACAGTATTAATTTGTGTATTGATACCATGTACATATGTGTATTTAAAAAATATAATAAAAAGAATATTTAAGAATGATTATTACAATTTAAAGAAATCGAAGAATAATAGTACTTATCGGTCATGTACATGTTCGTTATGTAAGCAAAAACAAGAGAAACGAAATAAAAATACCAGAATATGGGAAAGAATAGGATATATAAAAATAATTCAATTTTTTCTTTTAGTCCTATTTTGGGGGCTATTATATATATTGATAAATCAGATGTTGAATACGAAACCAATGCAGACATTTGATCCGTTTGAAATA…	1953	835.5	0.172676
PF3D7_0726400	PF3D7_0726400_e4s1	TGCTTGTTCAAAATTGAAGACATATTTCAATTTCTCCATCGAGCAATCACCTTCGACCCTTTTCTTTTCAAAGATGATGAAGATGACGAAAGAATAAAACGTTTGACAAACCCGTTAGAAAATAAAGATTCAATAAACAAATGTAATTTTTTTGAAACCAATTTAAATGTGGATGAAGAAAATAAGAATTATCATAATTTCGTCTATCTACTTAACGAAAGAGATAATGCATCATCTGAATATATAAATAATTATTATTGTATAAAAAAAATTAGTTTTGATAAAGAATTATGTAAAAATATTGATATAAATATACAATTACATAAACTAAAAAATGTCCTATTCTCATCTTTACAATTAATTGATTATTTGTTAGAAGAAGAAAAAAGTTATGAAAAA…	2487	893	0.171055
PF3D7_1360500	PF3D7_1360500_e13s2	TCTAAAGATGGTGTTTCTTATAATTTCCTATCGGATAGTTTGTTTTCTTCAGATAATGAGTATTCTTCAGATAATGAGTATTCTTCAGATTCTGAAAAATATTACAAAAAACGTTTTAAGAAAAATAAAAAAATTATAAAATTTGATGATCTTTTTACTAAAATATATATAAAGAAAAAACGTTTACTTCAAATGAATAACTATGACGTAAAGGGAAAGGGAAAAAAATTAAAGAATAAAGGAATGGAAAGAAATAAAACAAAATATAAAAATGTTAATGAAATAACAAAGATGAAATATTTTGTCAATAATGAAAATAGAGACCATGAAGTTAATAAAGAAGATATTTCAAAAAGTATGCAAAAATATTTTCTACATATATCAAAACATAAAAAAGAA…	2922	886	0.171044
PF3D7_1422700	PF3D7_1422700_e1s1	ATGTCGATACAAGAAAACCAAAAAGTGTTACGTTCTTTAATACGGACGGTAGGAAGGATATCTCAATTTTTTGATGAATATGATATGTGGAAATGTTTTTTGTCAAATATTTATAGATATGAAAATGAGAAATGTGATAAATATAATGATTTTATGAAATACTATTTAAACAACAATACACATTATTGTCCTATAACATCAAATAATAAAAAATTAAGAGGAGAATTATTAAAATATATGAGGAGAAATATAAACGATGAACAAGTATATAATATAGGTTTTACAGCTATACGACATTTAGGAAGAATAAAAAATTTATTGACAAATGTATCATCAAATAATAATAATAATAATAATATGAATATACAAAATAATGTAGAGAAAAATATTATGAAGATG…	1815	835.5	0.170986
PF3D7_1206100	PF3D7_1206100_e4s1	ATTTTGTCCCTTGAAGAAGGTTTAGATTTATTAACATTTGATGCTGACGAAACGCTATATCCGGATGGTCATGATTTTAATGATGAAGTTTTAGCTAGCTATATATCATGTTTATTGAAGAAAATGAACATTGCCATAGTGACAGCAGCTTCT	153	894.5	0.165619
PF3D7_0935900	PF3D7_0935900_e1s1	ATGGCTGATTATAGTAGTAATGAAGAGGAAACTCCAAAGGAAGAAAAGAAAATCTCTAAATTGGAAGATATGCAAAGCCCATTTGATTATAAAAGATTTTTTCGTAAGTACACAATCTTTGCTCCCTTTATTCTTGTGTACTTTACCTTAATGTTTTTTGTTAATTCGACTGTGCAAAATGGTACAATG	189	883.5	0.165392
PF3D7_0612800	PF3D7_0612800	ATGCATATAGTGAGCTTTATTATTTTTTTCTTTGCATTATTTTTTCCAATTTCCATCTGTTATAAAATAAATGGGGTATGTGATTTTTCGAGCGAAGGGCTAAGTTTGTTGCCAGAAGAAAAGTTAGATTTTTCTGTATCAAGGAATGTAGATAAATTATCTGATGAAAACAATGTAAGACATTGTGTACATTTTAGTAAGGGTTTTGAATATTTACGTTTTATATGTCCAATGAGAAAAGATAATTATGAAGGAATTGAAATTCGTCCTGTTGAATGTTTTGAATATATTCATATTGAAGGAAGAGAACACAAATTAAGCGAGATATTAAAAGGTAGTTTATATGAAAAAAGTATAAATGATAATATAATGACGAGAGATGTTTTTATTCCTCCAACT…	1113	831	0.165384
PF3D7_1016100	PF3D7_1016100	ATGGTAATATTCATTGCTATATTAGACCTAATTATCGTTCTTGCTATTTATTTTTTATTTTTCTATTTTATTGTGATGGAAAATAATATTTGTGTGTATGATTGTAAAGATCATTCCCTTAAAAAGATGAAAAAAAAAAAAAAAAAAAAAATGCGAAACATATATAAATTATTAATTGTTCTGTCTATTTGTATAATATATTATTTTAACTTAAATTTTTTTTCAGTATCTGCAAAAAATATAAATAAAGAAAAAATAAACCCTCATGGAATTATTACATCATCTGTTCCTAATGATAATATAAATATAATAGAAGCAAATGAAAAGGAACATAATAGAAATTATACTACAGAAGAATTATTAAATAATAATGAAGAAATAAAAAATGAAGAACTTTCT…	771	831	0.165364
PF3D7_0505500	PF3D7_0505500_e2	GGAGAGGAAAAGACGCCATTTTTAATTTTGGAAGACAACATCCATCCTGTGGTTGCTATGTTAATGCCCAATTTTATTTCGAACAATATTTATATGGGATGTGATAAAGAAAAACAATCTACATTATTATTGACAGGTCCTAATATGGGTGGTAAAAGTACCTTATTACGTCAAACAGCTATTTCTGTAATATTAGCTCAAATAGGTGCATTTGTCCCTTGTACTTATTGTGAATTAACAGTTGTAGATAAAATATTTACTCGTTTAGGTTCTAGTGATAATTTATTTGAAGGGAAAAGTACCTTTTTAGTAGAATTAGAAGATATTTCTAACTTACTAAAACAAAGTACTAAATATAGCCTAGCTATATTAGATGAATTAGGTAGAGGTACTTCTTCT…	813	883	0.163517
PF3D7_1426700	PF3D7_1426700_e1s1	ATGAGTAATAATCATAACAATTTCATTTATTGTAGTGGTACAGAAGATGACCACGTGAATAATGCCGAAACTGGAGGAAAAGAAGATGAAAAATTAAAATTTTTGATTGAAGGGAAAATGATAGAAAAGAAAGGTTGTGTTGATTTTATAAAACCTTTAAAAGATGATATAAAAGCATTAGATTTTTTATTATTTGATATGTTAAAAGATAATTTACCTAATAATTTATTTGAGATATTATGTACTATTCATGATTTATCTGAAACATATAGTGAAAATCCGAATGATGATAATTTCTTAAGTTTAAAAAATTGTATATATAATTTAAAAGATGAATATTTAGGTACAATTGTGAATGCATTTGGACATATGTGTGTTATATCTAATTTTGCAGAATGG…	1752	830	0.163249
PF3D7_0826100	PF3D7_0826100_s9	AATATATCTAATGAAAATGATTGTAATATTAATATAATGAACAATGTGCCGAATAATAATAATCAAGACAATATATCAAGTGAAATAAATACAAACGAAACAAATAATAATAAAAGTTTCGTAAACAATAATGATATGGACAATGAAACAATTAAAAATGACTATGAAAAACATATAAATAAAACAAGAGTTGATGAAGAAACCAAATTTGATATATGCGCAGATTTTTTTCTCTCAATAAATATTGATTTATTGTGGGAAGAATTTAATAAAACCATGCAAGTTATTAATAATTCATTGATTGATAAAAATTATAAATTTAAAGATAACTATTATTATAAAGATTTAAACACAACTAAAGATGATAATAAGAAAGAAAATAATAATGATAAGTTACAA…	2901	880.5	0.162556
PF3D7_1003700	PF3D7_1003700	ATGAGAGTTCGAAGGTTACAATCTTATTTAACAGAAAATAATTTGTTAAAGAAAAGTTCTCTTGAGAACATAAAAAACTTAACATTAGGAATAGATGCTTTATATTTTTTAAGAATATGTAGTGATTTAAAGGATATATTAAGTGATGTATCAGGTTGTATATCTCCTTGTATTTTCCATATGATAGATAAGCAGTGTGAGTATTTTAAAAAATGGGATATAAAGATTATATTTATTTTTGACGGCATAACACCTAAAGGACATAAATTATTTTCAGCACATTATCATCAATATATAGATGAGGGATGGTTATATTATGTTAATGATGAAAAGAAGTTATCACAAAAATCTTTTAGTGAAGTGAATAATATATGTAATTCTGATATATCTTTTTTATTA…	1992	830.5	0.1623
PF3D7_0201900	PF3D7_0201900_e2s2	GAAGAATATAATGAAACCGATTTAGCAAAAGGTAAGGAAGTAACTAATAAAGCGCATGAAAATCTAGAAGAATATAATGAAACTGATTTAGCAAAAGGTAAGGAAGTAACTAATAAAGCACGCGAAAATCTAGAAGAATATAATGAAACTGATTTAGCAAAAGGTAAGGAAGTAACTAATAAAGCACGCGAAAATCTAGAAGAATATAATGAAACTGATTTAGCAAAAGGTAAGGAAGTAACTAATAAAGCGCATGAAAATCTGGAAGAATATAATGAAACCGATTTAGCAAAAGGTAAGGAAGTAACTAATAAAGCGCATGAAAATCTAGAAGAATATAATGAAACTGATTTAGCAAAAGGTAAGGAAGTAACTAATAAAGCACATGAAAATCTAGAA…	2442	828.5	0.158713
PF3D7_0906400	PF3D7_0906400_e1s1	ATGAAGAAAGATAATAAGAATTTTTCAAATACTTCAATCGGTCTTTTAAAAAAAAAAAGTACAACTAAACAGGATATTTCGAAAGTTAATGTGAAACATAAAGATAAGGCAACAATAAAAGGAAAAGATAACATTCCTGTATTATCTAAAAAAAATAATATAAATGATAAGAAAAAAGATATAAACATATTAAACCATTCTACAAATATAAAGGTGAATGAGAAAGAACGTTCAAATTTAAATAGTTCAATTATAAACATAGAACATGATCATAAAAATGTTGATATCAATGGAAAAGTAGAATTGGTAAGTGACGAAAAAAAAGAAAAAATAGAAAAAAAAGATAAAAAAATGGAAGTGGATAATATTAATAAGGGTGATAATTTATATAATGATAAC…	2511	827.5	0.158583
PF3D7_0208900	PF3D7_0208900_e1s1	ATGTTTATTTATTTATTTATTTATTTATTTTTCAAAATGGACAAGAAAAGGACATTTTATTATTTGTTCTTCTTTTTTACTTTCCTTGTCTACGTTTTGTACTTTGATAATATTAAGAGTGTGTTGAGAAGTAGTACAAAAAAAAAAAAGAAAAAAAAAATTTGTAAATCGACCTTTTATGTTCATGAAGAGAGTGAAGAAATAAAATCATGGCTAAGGAATAGTAATGAGAGAGATAAGGGGAAAAAATTTTTTATATTTGAAAGATTGATAAAGGAGAGAAAATATATATGTGTAAATAAATACAAAAGAAATAATAAATTAAAATGGATTTATAAGAACACATATGAGAAGACAAAGAATATATGTGATGATTATAATATTTTGTTTAAATGTATA…	2547	824.5	0.15395
PF3D7_0111500	PF3D7_0111500_e5s1	GGAAGAGTAGATGATAATATGGATACATTAAAAAAACGATTTGATACTCATAATAATGATTGTATTCCTATAATAAATTTATTTTTAAATGAAAACAAATGCATTTTTATTAATGCAAATAAAAATATTCAAGACGTTTGGAGTGATATTCAGTATGTTTTTACAAATATG	171	894.5	0.151059
PF3D7_1319800	PF3D7_1319800	ATGGGACTAGAATTTTTTGTTTATCTACTAATTTATTACATCTTGACCACACAAGTAACCTGCGATGATAATTACCTTGACGATGATAATAGATATAACCCTACTATGGATATTGACTTATCGTCTTCAATGAGCGACATATCTAGAAAAATGAATACAGATAGTGGAAGAAAAGTTAGAATAGCTAAAAAAATCTTTAAAGGCTTAGGAGCTTTTATGATACTTCTAACATCCTTTCTTATTGTTTTAGACAACATTACACTTAATAATGAGTTAGCTAATTATAAAAAAAGAGAAATAGACTTAGCGGCTAAATTAATTAATGCTGAACATGAAGCTATATCTTCTAAAGTTGAATACGGTAGAAAAGTTGAAGAAATGCAAAGTATAATTAATAAA…	435	878.5	0.150972
PF3D7_0612700	PF3D7_0612700	ATGATAAAATTAAGTAAGAAGTATTGTTTAGGGATATCCTTTGTATTATATATTTTGTTGTCTGTTTGTGAAGGGCATAAAAATTTAACATGTGACTTTAACGATGTATACAAATTAGAATTTCATCCTAATCAACAAACAAGTGTTACTAAATTATGTAATTTAACTCCTAATGTATTAGAAAAGGTAACTATAAAATGTGGTTCAGATAAATTAAATTATAATTTATATCCTCCAACTTGTTTTGAAGAGGTATATGCATCTAGGAATATGATGCATTTAAAAAAAATAAAAGAGTTTGTAATCGGATCATCAATGTTTATGAGACGTAGTTTAACACCAAATAAAATTAACGAAGTTTCTTTCAGAATTCCACCTAATATGATGCCTGAAAAACCT…	1041	823	0.150889
PF3D7_1016900	PF3D7_1016900_e1s1	ATGAAGGTTTCTAGGCATACCGTTCTTTTAAACATTATCCTAATCGTTAGCTTATTAGGATGTGTTTTAACTCTTAACCTTTTTTCTGCAAATGATGATAAGAGAGCGTTGAAGGATATCGACAGAACATTAGAAAAACTTTTGAGGAAAAAGCAAATCATCATATCTACTGCTGCTGTTGCTTTGGCTATAACCTTAGGTGGTTTATTTGGAAGTTTAGGATATAAGAGCTGGAAAAACAAAAACAAATCAAAAGATAAGGTGAATGATGGATCCGACTCTGAGGAATTAGATATG	297	885.5	0.150737
PF3D7_0726400	PF3D7_0726400_e2s1	AGTCCTAATAAAATCGACAAAGCATTATGCATATCAGATTTTAATTTTTTATTAATCCAAAAAAGTAACCAATTATTTATACAAGAATTTGATAAGGATAATTTCAACGAAAACATAATAGATATAAAGATATTAAGAAGACAACATATCGATATCTCAGTTCTTTTCTTTTTTCCGTATAATGATTTTATATATATTATTGATAAAACTGGAATATTATGG	222	874.5	0.150018
PF3D7_1412500	PF3D7_1412500_e1s1	ATGTCTGAAGAAGCTGTTGCTTTAGTAGTTGATAATGGAAGTGGTATGGTGAAGTCTGGTTTGGCTGGAGATGACGCTCCAAAATGTGTCTTCCCATCTATTGTAGGAAGACCTAAGATGCCCAATATTATGATAGGCATGGAACAAAAAGAATGCTATGTAGGTGATGAAGCTCAAAATAAAAGAGGTATTTTAACTTTAAAATATCCAATAGAACATGGTATTGTTACAAATTGGGATGATATGGAAAAAATATGGCATCATACGTTCTATAATGAATTGAGAGTTTCACCTGAAGAACATCCAGTCTTATTAACAGAAGCTCCATTAAATCCTAAAACAAATAGAGAAAAAATGACTCAAATTATGTTTGAGACATTTGATGTTCCAGCCATGTAT…	450	876	0.149776
PF3D7_0905300	PF3D7_0905300_s5	CCCAAAGGTGATTATAATGATTATGTAAGTACTAAACAAAATAAAGAAGAAGATAAAAACAATATAGAATTAGATAATGAACAAAATGTAGAAGATGGAGAAGAATTCGAAAATGAAATAAGTCTAATATATGATTTTTATTTTGATATGAAATTAAAAAAATTAGTTAAATGGAATGTTGGTCCATTTAAAATGCCACGTAATATAAATTCTATATCATCTATATTAATACCAACTATCGAAACAACAAAAGTAGAACATATAATCAAATTAATATCTAATATACCTATTAGATGTTATAATTTCCATACTTATAAAAGTACCTTATTATTAGGTTCCACTGGTTCAGCGAAAACTTCAATAGCTTTATTATATACATCTAAACAAGAAAAGAATACC…	2670	874	0.149016
PF3D7_1328000	PF3D7_1328000_e1o1-s5	AATTTTGTTGATAATTATTACCAATTCAACCAAATAAAAGTAGAAGAACCTGACGAATTTAATAATTTCAGAAATATGGATAAAGAATATACATATGAATCAGATAACAAAAGTATATTCAAGAATAAATTATCAACTTTTACTTTCTCAGAGGAAGATGAGAGTAAAAAAAAATATAATATTAATGAATTAAAAGAAAAATATGTAAATATATATAAAGAACAAAATATAAATGATAATTATACTACTAATGTTTTTGAAAATGCTTTTGATAAAAATGCAAATAATAATAATAAATATTTTACTAGTAAAACAATGGGAATAGAATATTTTCAAAATAAACAGTTAGAAAATATGCCTCAAATGGGAAATAAGAAAATTATAGAAAATGTTACCAGT…	822	822	0.14898
PF3D7_1245600	PF3D7_1245600_e1s2	AATATGAAATTAAATATGGAGAAATTAAAAAAATGTAAAGATGATAATAAAAATACAATAAACCAAATACAAAAGAAACAAGAAAATGAAGAACACGCTTTGACCATAAGAAATTTAGCTAAGGTAGATCCTACCTTGATTTCTAAATACGATATACAGAAGAAATATCAACATAATAATAATGATGTTTATGATGAAGGTGTACATTATTTAAATGTAGACGATAATAATAATGATGATGTACATGCGGATAATAATGATGAGACACATATTCATGATAATGATAATGATAATGACGATGATGTGTTAATAGGTGATATATTAGTAAAGATGAAAAACGACATATGTAATATAATAAAATTCAATTTGACCAGTTTAAAATGTAATAGGAAGGAAAAT…	2430	821.5	0.148787
PF3D7_1032800	PF3D7_1032800_e1s1	ATGGATGACTCTTTAAACAAGCTGCAAGATAAATTAAGAAAAGAAAGAACCAATGCTCAGTTCATTTTAAATAAATGTAATTTTAATATTATTGAACGATATGAAGATTCATCGAGTGAAGAAGAAAATGAATTTGAAAATAATAATAGTAAAGGAAAGAGCGATTTAAAAAATAATGATGAAGAAAATAATAGCTTATATAATCAAAAGAAGGATAATATATTGAATGATAACAACAATAACGAAAATACTGTAAGTAAAAACCAAAGCTCTACAAATAATCAGGCATATACAACATATAATAATTATAAATATTTAAATAATAATGTTAGCTTCCCTTTAGCTTTACATAGAAGTATATTAAATTTACAAAAAAATAATAAAAATGAAAAACTACAG…	2601	872.5	0.148675
PF3D7_1320800	PF3D7_1320800_e3	GAAACCATTAAAGTACCTAGACTTGGTGATTCAATCACAGAAGGTACAATAAATGAATGGAAAAAAAAAGTGGGAGATTATGTTAAGGCGGATGAAACGATAACAATTATCGATACAGATAAAGTTAGTGTTGATATAAATTCTAAAGTAAGTGGAGGGTTATCCAAAATTTTTGCGGATGTAGGAGATGTTGTTTTGGTAGATGCACCTTTATGTGAAATTGATACATCTGTAGAACCACCTGAAGATATTTGTAAAACTAAAGAGGAAGTAGGAGAAAGTAAAAATAATGAAAATAATTATACATTTAATCAATTAAATAGAGATATTAAAGATGAAGCACATATAAAAGATGAAGTTAGTAAAAATGAAAAAGATATTTTTGTAAAAGATCCTATA…	1128	871	0.14751
PF3D7_1205900	PF3D7_1205900_e1s2	AATAAAAAGAAAAAAAAGAATAAAAAGAAAAAGAAGAAAAAAAAGAAGATTAAAGATAATCCAAATGGACGTAAGGAAAAAGACAAGTTAGATGACCTAACTGAGGAAGATAAAATAAAGAGCAATGGTTGTTATGAAAAAGTGAAAAAAAAGAATGAAGAATTTGGTGATTTTATTAAAAAGGATAGTAATACATCTGAACAACTTAACAATAGCAATAATAGCTTGAATAATTTAGAAAATAATAAAATAAGAAAAAATATAAATGAGAAAAATGTAAAACATGATATGATAAACGATGCAGATATTTTATCGAAGATAAAAAGTCATATTGTAAATAAAATGGATATATATGAAAGTGAAAGTTATTATGATGAGAGTGATATGGAGAAGCATTTA…	1647	872	0.146868
PF3D7_0210200	PF3D7_0210200-S1	ATGTCGTTTAAGAACAACGAGAAGTACATGGACGAAGAGAATGATCAGGAGTCCGACGACGAGTTCTTTAAGGTGAAGCGGAAGCCCCAGATCAACGTCGATGCCGAGGAAGATGAGGACAATAATAATAACAATAACAACAACAATAACAACTCCAACATAAGCAACCACATGAATGAGTTCGACCTCGAAGAAGAGGATGAAGACGACTACGAGGACGAAAACTACATAGTGGGGGAGACGATCGAGATCGACGAATCAAAGCTCAAGAATGAAAAGATAGAGGAGGACATATTTAACGAAAATAACCTGCTGCACGGCATCAAGACCCGCGAATTGCTCGAGCAGGAGATCCTGATCCTCTTTAGCAATATGCTTAAGAAAGAGACAATTCTGTGC…	1743	880.5	0.145965
PF3D7_1354200	PF3D7_1354200	ATGACGAATTACTCTAAAATTCCTTTAAAAAAATATTATTTAGAATCACACGGGAAATATTTGTGTATAGTAAATGTTGAAAATAATGTAAAGAATATATTAAAAATTAATTATTCAGAAAATATAAATATAACGAAAGAGCAAGAGTGCATAACTAGTAAAAATACTATCATCGAAAATGATAATAAAAATAAATTTTGGTTTTATGGATGTTTAGGTATAATAAAAGCAGAAAATATCAATTTCTTGGTAATTGTATCGGAGGCTGAAGTAGTATGTAATATATTTAATCGGTCTATATATAGAATAAAAAGAATATCGTTTGTACAACTAAATTGTGAAAAAATGAATAAAAATACAAATGAATTATATGAGTATGAAATATGTTATTTAGGAAGT…	2409	871.5	0.145585
PF3D7_1103800	PF3D7_1103800_e1s3	GAAGGAAAAAAAAAAAAAAACGCACTTCAGAATAAAACTATTTATGTACACGGATGGGGAAATGTAAATATAAAAGAAGCAATCGATAAGTTAAATGTCGAAGCTCAAAAAATTAAAGAAAATAATGAAACTGTCTATTTTTCAGATGTAATGCAATTCTGCGTAGAATATTTTAATAAGGAACAGGAGGAAGATGAAAAAGAAAAAGAACAAGAAGAACAAGAAGAACAAAAAGAACAAGAAGAACAAAAAGAACAAAAAGGACAAGAAGAACAAAAAGGACAAAAAGAACAAAAAGGACAAAAAGAACAAAAAGGACAAAAAGAACAAGAAGAACAAAAAGAACAAGAAGAACAAAACATTGAACAAATAATAAAAAGTAAAGGGGAAGAAATCCAA…	2571	819.5	0.145125
PF3D7_1120700	PF3D7_1120700-S3	TTATACCACATCTTCATGGAGAAGACCAACGTTCACATCTCCGATATCATCCATAACGAGATTAAGATGATTACTGAGCGCAAGAGCATGCAGGAAGAGAACATCTTGCTTCAGAACACTCAGCACCTGCAGACCACGCGCAATACCGAGCACGTCCACAACATTGACGTGATCCAGAACATCAAGGACATGATCGAGCTGAAGTACGAGCACATCACCCAGAACATGAAGCAGATCGAGAAGCAGATGGAGACGCACAACAAGAAGGACAGCTACAACAAGATTTCAGCGTGCATCAGTACGTTCCAGAAGCAGATCAACGACGCCATCGAGAAGAACACTCAGACGTTGCTGAACATCAATGAGAGCACCATCAAGTACATGGACCACACTCACTTG…	1230	873	0.142622
PF3D7_1118900	PF3D7_1118900_C	ATGCTCGAGATGAACCTGTTCTCACCGGTGATTTTCCCGCTGCTGATTTTCCTTCTCTCGTACAATGGGTCCTACGCGAATTACAATATTAAGACTATTAAGCTTATTTTCGAGAGCCGCGACAAAGAGTCCAGTAAGGTCATTAGCCTGTACGGCGAGAAGGATAGCTTCGTGTGCCGCAGCGAGAACAACGAGTACATTCGTATCCAGGACGACAAGACGATTATCAACAACCTGAACATCTACGGCATCATCCACACTAACGACCTGCTGTACTTCGAGAAGGAGCAGTGGAAGCTGTACTACATGGAAACCTTCGACGTTAAGAACGAGAGCTGGACTCCGAGCGAGTACAGCACCTGCGGCAACAGTCCGGACACTTTCTTAGGCGGCCCATGC…	827	818	0.14241
PF3D7_1136900	PF3D7_1136900_e2s1	AGTGTGGCCTCCATTAGCAGAAATTTTGAAATTTCTCCGTTCTCAAATTATGGACACAAGAGTGTGCACATTTTAGCCCCAGGTCATCACATATATTCTACTATTCCAAATAACTCATACAAGATCTTTACAGGTACTTCTATGGCTGCTCCTCATGTATGTGGTGTGAGTGCTTTGGTATATTCCGTTTGTTATAACCAAGGTTTTATTCCTCAAGCGGAAGAGGTGTTAGATATATTAACAAGGACATCTATAAAAATAATTTCTACAAAGAAAAGAACCATAAATGACAGTTTAGTTAATGCAGAAGGAGCAGTTTTGACTACTTTATTAGGAGGACTATGGATGCAAATGGATTGTTATTTTGTTAAATTTAATTTAGAAAAAGGCAAGAAAAAG…	1284	818.5	0.141706
PF3D7_1361700	PF3D7_1361700_e1	ATGTTTAAGTTTAATTCTAAATTATATATTGGATTAAGAAATATTAATCAAATAATTAATAAGAAAAATGTGAATTATATAAAGCCAAATGTATTGGGCAATATGCCATTTAAATACAAAGAATTCGCAACAGTAAACAAAAGTGATCATAGTGATAAAATAAAAAAGACTAATAACAATGCCCATACAAAAAATAACCATGAACATGAATCACATACGAAAGGATTTTATCACCATATAGATCATCATCATGGTGATCCACGTGCTCATTTAAATGAAGATGGTACAAGAAAACCAGAATATGATTTCAATAATTTTCATTGGGATGATTATTGGGCTAATACACCTAAACAAAATATTGTAATTGTAAATGGACAGAAAATGATAAAAGGAGATGAA…	633	870	0.140379
PF3D7_0604000	PF3D7_0604000_e1o1-s3	GATAATGACAAAAATGTTATTTATGATAATGAAAAAAATGATATTTATTTTAATGACAAAGAGAATATTATTGCCTCTTCAAAAATTAATAAAAATAAAAAAATTCTTAAACATACAAATGAACATACTGTTAAGGACCTAATCACATCGACTGAGCAACAGAAAAAGAAAAACTTATCTTTTAATTTAGAAAATGATAAAGTTATAAATTATTATTATTATGAAGGATCAGAACTATCTGAAGGAAGTCAAGGTAATAAATTTCGTATAGATTCCTGTCTTACACAATATGATTTGTTACAAGTAAAGGATGATAAAATTTTTGATTTAACAAATTATCTAATAAATTATAATATAAATCAAGACGTACATAAGAAATATAAAAAAAATAAATTCTTA…	1500	869.5	0.139617
PF3D7_1304100	PF3D7_1304100_e1s1	ATGAATTTCCTAATATTAGTTGTATTAATTAAGATGGTTGTATGTAAAATTATTAATTATGTTAGAAGTGATTATAATTTTATGCTGTCATTTTTAAGGACGAGAAAAATATTTAGTCATAAAAAGATTTATTTCAATTTTAAAGTTTCTAAGAATATTACAAAGAATTCATCATCTAATAGTTATAGTGATATATTA	198	869	0.139419
PF3D7_1324300	PF3D7_1324300_e1s5	GATAAGCTTCATATGTCTTCCATTTTTCCGTATTATGATACAAATAAGGAAACTAATGATATAACACAAGATAGAAAATGTTATAATAATAATAATAATGATATTAATAATGATAATAATGGTAACAATACTAATTATCTATTTAATAATAACATGTTAAGTCCATACAACAATTTTATTAATCAAATTATATTGATACACCCCTATTTTATTCTTATAAATAATACAAATTTTAATTTGGTCATGTGTACATCTTGTAATTTTTATAATAATAATAATAATAAAAATTATAAAACTAGTGAACGTGAAATAAATAAAAACAAAAGGAATTATTATTTCCCTAGACACTCTAGTCATGTCATCAATTTAATATCTTTAGATGTAGATAGAAATTTTTTT…	2637	868.5	0.139053
PF3D7_1324300	PF3D7_1324300_e3	CTATACAACTACATAATCCTCAATTATCTGTATGACAAAAAAGAAGACATGCTAATATTATTTTGTGAAGATACCATTATTCATATAAAGAGTAAGAAAAAACATTGTGTCATAAGAAAAGAAAATATTATAAAAATTGAAATGTGCTGTATTTATTTTAATATAACATTTGAGTGTGATAAAAATATTATCTTTAACATTAAAAATATTATAAAAAAGAATAAAAATAATTTCCTTGGTCTTTATTTTGACATACTTTTTAAAAACAAAAACAAAAAAAGGTTAATAAAAAAAATACAGAAAAACCTCGTAAAAATTTTGTACTTCCTTTATTATGTATTTCATTTTATATATAATTATAATAAAAAAATAGAAAACATGAACAAATTAAAAAATACT…	588	872.5	0.136953
PF3D7_0605600	PF3D7_0605600-S3_C	ATGCTCGAGTATAACGACATTCGCAGCAAGCGTGAGCGCAACAAGTATATCCGCGGCGAGAAGATCTCATACACCCTGATTAATAACCTGATCCACAAGGTAAAGAAGAAGAACACGACCTACACCAAGTACGACGAAATTATCAACAAACGCCACGTCTTCACGTTCGACGGACCGAGCAAGGGCACCCACGAGTACGTGGATGAGATTGAGAACTTCTTTAGCACAATCATGAACGTGGCCAAGAAGAAGGTGATTCTGATCTGCAACATGACTAACAAAGACATTAACTTCATCGGGTTCTACCTGCAGTACGCTTACGCCAACATGGTATTCTATGACCTCAACGTAGACGAGGACGTTGACGACAACATTAGCAAGTTCCTGAAGAAAGACATC…	1583	816	0.135998
PF3D7_1324300	PF3D7_1324300_e1s6	ATAAAATCACATCTTTTTGGATATCATACACATAGCAGGAATATACACCTATATGAAAAAAATAATAAAAATATATTTTATATTATAAAGAATAAGCAAGAAAAAGATAATAAGGAGGCCCTGCTACCCATAGATGAATATAATTATTATGTACATATAAAAAATGATATACGGTTACATTTATTCGCTTCTGTTATAATAGAAGATAATTATATTCATCGAAACAAATATGAATTAGGACATTCGAATGATGTATATAATTTTTCTAAGATAAATTATTATCATAATAAAAATGGAAGTTCCTTAAATATTAGTTCATCACATGATACTTCTTATGAACATTCGTATAATATACATGATAATATAATAAACAGTATTGAGAGTATGGCATTTTTAAAA…	2619	814	0.135303
PF3D7_1306500	PF3D7_1306500_e3s2	CCAATGAGAAATAAAATACAGACACATCAAAATTATGGATCACATAAAATGTATTCATATGAAAAAAAAAAGAAAAGAGAAGTATTTTTTAGATATGTACCTGATTATAAAAAAGCAATAAATATATATGCTACTAGTATTCAAGTTTATGAAAGCAAATATCACTTTTTAGTAAGTAATAAAGGGAATATAAAATTACTATCCAATTTTTTAATTGAAAATTTAAATATTTCATATATAATTACTTTGTTCAACAAATATTCATTATTACATAATCAACATGATGAAATAAATATAAATTTGGATAATATACATTTTAATATATATGAAATATATAAAAAATGTTCAGATGATAAAAAAAGGTTACTATCTAAAATAATATCCTATTTAGAACAATTA…	2655	864.5	0.134958
PF3D7_1348000	PF3D7_1348000-e3o4	AAAGAAGAATGGATGAAAAAATATGAAAATATTGAATTAGAATACGGTGCCCTGAAAAAAAAATTTGAAGAATTTTCCATAGACTACAAAAATAAAAATGAAGAAATAAAAAATTTTGCAACAATAAAAAAGGATATGATACTTCGCTATGCATACATG	159	871	0.133928
PF3D7_0218000	PF3D7_0218000_e1s1	ATGGAAAATATTCCGTGGGTTGAAAAGTACCGACCAAAAAGGTTGGATGACATCGTTCATCAAAATAATGCTGTAATGATGTTAAAGGAAGTTGTGAGGACAAAGAATATGCCTCATTTAATATTTCATGGTCCTCCTGGTACAGGTAAAACATCAGCAATAAATGCTTTGGCTCATGAATTGTTTGGAAAGGAGAATATAAGTGAGAGGGTATTAGAATTGAATGCTTCTGATGATAGAGGTATAAATGTGGTAAGAGAAAAAATTAAAGCATATACAAGAATAAGCATTAGTAAGAATAAAATCCATAGCGAAACAAAAGAGGTATTACCTTCATGGAAATTGGTTGTATTGGATGAAGCTGATATGATGACAGAAGATGCACAATCAGCATTAAGA…	990	863	0.133916
PF3D7_0532400	PF3D7_0532400_e1s1	ATGAGGTTTACTAATTCATTATATTCGATTAAAAATAATTCAATATTTGATATGAATTATTTAAAAATAGATAACTCTGGGAATTATAATTTTGGAGAAGAGAAAAATAAAAATAAAAATGCTAAAAGTTGTTTTAAATCATTATTAAGCAAGCCTATTGTTATGATAATTGCTGGAATTTTATATATAGTAATTTTG	198	863.5	0.133109
PF3D7_1322700	PF3D7_1322700	ATGGAGTACCTGAACAAGATTTATATGACCGCGCTGGGAAAGAAGCGCGATGTTACCATCGACGACGACGTGGACGTCGACGAGGATGTCAGTAACGAGAATATCGTAAACCGTATCAAGCAAAAGAACTGCTGCAAGAAGTGGTCTACGTCCATGTACAACAAGAACATTCTTATCAACTACCGCAACGACGTGGACAAGGATTCATTCTTCATTATTTTCGAGAAGGCGTGGAAGCTGTTCTTTCACGACGACACTAAGGGTAAGAAGTTGTTGCTGCACGAGGAGAACGACAATAACATCTACAGCCTGCCCAACTTCCTGATCATTGATAACCTGTCGAACTACAACCCCATTGGCACCGAGAACATCCGCTCCATGAACAACGACCAATGCGAC…	954	873	0.132869
PF3D7_0711700	PF3D7_0711700_e1s2	AAGGACACCACAGAAGACACAGAACAGGATGGGCAGGGACCACCGGTAAAAAAAGACGAAGTAAATCCATGTGATATAGTGTCTAAACTCTTTCAGAACCCAAACAATTTTTCCGACGCTTGTACCCTCAAATATGTTACTGGTAAAAACTACGGCTGGAAATGTGTATCAAGTGGTAACGGTACCACTAGTAGTGAGGGTCGTTCCCCACGTGTCGCACGTAGTGCCCCTAGTGGTGATAAGGACGGCGCTATATGTGTGCCACCCAGGAGACGACGATTATATGTGGGGAGATTAACGAAGTGGGCGGAAAGCAAACAGGTGACACAACCACAGGAGGATGGTAAGGCACCACTAGCTCCCACTCCGCCGACCTCGTCGGGGTCACAGAGTGACCCG…	2652	880.5	0.132827
PF3D7_0604000	PF3D7_0604000_e1o1-s4	GTTCAGTATGCATATTATGTTTTATTTTATTACTATTACAACAAGTATATGAAAATATGTCCAGATGACAAAATGTATAATAAAGAATGTGACAAGGAAGTAAGGAATTATGAGAAATTATCATTACGTGATAATATTACAAATATGTTAAGGACAAAAAAAAAACACAAAGATGAAAATAATATGAACAATGTGGATAATAAGGTACATTCAAATGAGGATTCTTATAATACTACCAAGTATTTTGGTACGATGGATAAAATACAACTTGATAATAATGTAACAATGAAAGAGGAGGTTCTAGAAAATGTTAATGATATAGATAAAAATAATGAACACATGGAAAAGTTAAATGTGAGTGTGGACACGCTGAAGTATAGAAATGAATATATTATGTAT…	1500	812.5	0.132624
PF3D7_0424600	PF3D7_0424600_e2s1	AACGTATGTTTACATAATGGTAGTAATACCTCCACAAATGTACAATTTAATAACAACGTAGGAAAAAGAATTTTATCAGAAGGACAATCTACAGATGAATATAGTGAATCCAGTTCTGAATATGTTGAAAATCCTGTTATAGGTAGTACTTTTATGTTACCAAATGAAAACCGATTAAATACCATTGGTAATTTATTTGAAGGAGAAAAATATAATATATTAGAAGATACACAGAAATTAATTGATGATATAAATAAATTTAGATATAACAGTAACTATAGTCCAATACCATATCCTGAACAATACAATCCTGTTGATTATAACAAAGCTGATTTTGTATTAGATAAATATATTGATAACTTAGGATACTGTAAAGGAGATACTATTAAAGCTATGGAA…	738	812	0.131817
PF3D7_0826100	PF3D7_0826100_s1	ATGAAAATACCTATACCTAAAGATGATAATTTCATATTAATGTTAGATAAATTAAGTCAGGAGGAGAAGTTTTTTATTCACATATTATCAACATGTGAAGATGAACATTTGTTAGGTCATTTATATCCATTCGTTGATTGGGTATGGTTAAAATCAGATTTGTTAGCATGGGCTCCAGTATTGAATAGATTTGATGATTTATTAAGGAAATATATCATACACAATAAATTAGTAATGCAAAAGAAAAATAACAAAAATGGTGATAATGAGGGAAGTGATTATATAGTAATGAATGATCGAATACAAAGGATAACGGGATGTACTTTAGAATATAATTACAACAATTATAATGATAATAATGATAATGATAATAATAATAATGATAATAATAATAATGAT…	2913	811.5	0.131057
PF3D7_0519200	PF3D7_0519200_C	ATGCTCGAGATGCGCCAGTGCGATCCGAACTCGGCATTCTTCGGCTTCATGGGAATCGCCGCATCATCTATTTTCTCCAACTTGGGTGCGGCGTTCGGGACTGCAAAATCCGGAGTGGGCGTGTGTTCAGTTGGTGTGATGCGCCCGGACCTTATCATGAAGTCGATTCTCCCAGTTGTAATGGCGGGCGTTCTGGGAATTTACGGTATTATCATGAGCATCCTGATTTACGGGAAGATGACCCCGGCGGAAGGTTACAGTACCTTCGCCGGCTACGCGCATCTTAGTAGTGGACTGATTGTCGGTTTGTCCTCGTTAGCGGCGGGATTGGCCATCGGCATCGTGGGAGACGCCGGCGTGCGTGCCAACGCGCAGCAGAACCGCCTGTTTATCGGCATG…	578	811.5	0.130995
PF3D7_0804500	PF3D7_0804500_e2s3	TTATACAAAAAGAACCTGACCAGTTCATCAAAAAATGCATCGAAAGAAACAAAAAATAAGGATATACCGAATGTTACCAATGATAATACTTGTAGTGTTAAATGTGTAAGTGATTATCGTCAAGAAGAAAAAGAACGTGGACAACATTATAAAGGTAGGAAGGATGATCAAGAGACTTATGAGGAGGAATATGATGAAGAAAGTGAACAGGATGATTATTACGATGATGATTATTATGATGACGATTATTACGATGATGATTATTATGATGATGATTATTATGATGACAATTCCTATAATGACAATTCCTATGATGACAATTCCTATGATGACAATTCCTATGATGATGAAAAAAAAATGAATAAAAAATCACTTCCTTACAACAAAACACAAAAGAGA…	2121	811.5	0.130913
PF3D7_0502500	PF3D7_0502500	ATGAAATTTATAAGCATCAAATATTTGTCCTTGTTTTTCCTATCCATTTTGTTCGTTCATTCTTCATATAAAAGGTATTATATTAAATGTCATGATATATATATTAGCAATATATTAATTAGTAATTCTTCTTTTATATTTAATAAAAATATTTATCTATACAATATACTAGTTAATGATGACGAAATTAATATTAGCCCTTTTTTAAACATATGGGAAGATTTTCTATATAGAAATGAATCATTACAAAGTGAACCTTTTTATGAGGAAAATACTTTAGAATATGTTAACAATATATCACAAGATCTTGAGAGAGATGAATTATATTTAAAGAAATATTATATTCATATAAATAATAAAAAAATTAATTTTTATGATATCCCTTATACTCTTTCTCTT…	1782	811.5	0.130597
PF3D7_1331300	PF3D7_1331300-e2o2	TGTGAATCACCCGTTGTTGTTGTATTAAGTGGGAGTATGGAGCCAGGGTATTATCGAGGTGACACATTGGCATTGTATCATCCTCCAAAAATACATGCGGGGGATGTAGTTGTATATCAAATAAATGGAAGAGATATACCAATTGTTCATAGGATTTTAAGTTTGCACACATCAAAAGATAATAAATTTCACTTATTATCAAAGGGTGATAATAATAATATTGATGATAGAGGTTTATATGATCCACACCAATACTGGCTAGAAAATGAACATGTCTTAGGTCTTTCTGTTGGTTATACACCATACATTGGAATATTAACCATATGGATAAATGAATATCCAGTAGTTAAATGGGCAATTGTTTCAATAATGCTAATCATGATATTAATGGGATATGAA	399	811	0.130205
PF3D7_0628200	PF3D7_0628200_s1	ATGTGTAATTTTATAAAAAAAGGTATTAGGTTTAATGGAGATAAATATATTTTCCTTTTTGATATATTTATAAAGAAATATTTATTAAATGTATTCGTAGCAAATATATTATGGGAAGAAGAGAATAATATATGTTTTTTAAATAGATTAAAAAATAAAAGAAAGAAAAGTATTTTATTTCTTAAAGAAGAATATTTACGATATTTAATGATATTAAATAAGGAAGAGAAGAATAAAAAGAAACGATTAAAAAAAATATATGAATGTATAAAAGTTTTTTCTATTAAAGAATTTCGATGGCTTATCAATAAGTTGGAAATAATATATTTTTATTTTTTTTGTCATTTATTACTTTTATGTATTTTTCAAAATATTTTTCTACTTACATACATGAGTAAA…	2346	811	0.130139
PF3D7_1475500	PF3D7_1475500_e1s1	ATGCATCATTTATTGTTTATAATATGGTACATCATTTTAAATTATTATGTAAGTGGACAAGAATCTGCTACCAATTTTTATAAGTTCATCGATTCATTTGCTTCATCAACGTACATGTCTGAAGAGTCCGGAAGCTCGGCTTATGATGCTAAACGAGCTATTCAAAATAACCCGAATTATTGGTGTAGTTCGGGAAATCACTCAAATGATGAAGAAATAACATGGACGGGATATTTAAATACTAAAGGTTTTATTAAAGGGGTAAAAGTATCTTGGGCTTATAGCCCAGAATTTGTTAAAATATCTGTTTCTTCGGATGGGGAAAAATATCGTACTATTATTCCATATAAAAAGATATCTTCAAATGAAGCTTCATTTGATGAAATATATTTTTTTAAA…	2460	811.5	0.129784
PF3D7_0418000	PF3D7_0418000-S3_C	ATGCTCGAGTTCTACGAGGAGAAGCGTAAGCAGTACATCAACATGAAGAAGAAGAACAACAAGCAGTACCTCGTCGGGACCATGAAGAAGGAGAAGTACCTTAACCAGAGTCTGTGCCTGAAGAAGAACAACAAGATCAACAACATCAACATCATCAACAACGACGACAACTTCCAGAACGTTCAGATCATTAAGCAGTACCTGATTTACCCGCAGATCATCCACTTCAACTACATTCTTCTGAACAAGGAGTTCGAGACCTTCATCCACTTACACAACACCAACAGCATTCACCCGATTAACATTTACTTCTTCTTCCACAGCGACAACATTAAGATCACCTACCCGGAAGAGACTAAGACAACCTGCCACAATAAGATCAACGACAGTAACATCTGC…	1583	867.5	0.129724
PF3D7_0723200	PF3D7_0723200_e4s1	ATAGATAAAGAGAAGGATATAAAGATAGCTATATTACTACATGCACATATAACAAAATTATCCGTTCGTGTACTTGGATTTGATAATTATAATGAGGGATTGTCATCTTTTGGTTATATTCCATTAAGAAGATGGACAAATGTTATAATAACATTGAATAATAAAGAGATAGTAATATATATAAATGGAATTTTTGATAATTCAGTGTCCTTAAAAAGTAAAGTTGTTGAAAAAGCAGGTGATTTAACCGTTGGAAAAAATATGAATTATTCAGGATTTAATGGATATTTAGATGAATTATATTTTTACAATAGAAGTTTATCAATATCAGAAATAAAATCATTTTCATTACCAAGTGTGACTGGAATATATGATACAGATTATGTATATGTAGGAAAT…	618	881.5	0.12957
PF3D7_0505500	PF3D7_0505500_e1s1	ATGGCATCATCTAACAAAAAGCAGTCCTCTATTTTAAGTTTTTTTAAAAGCAACGAAGAAAAAACAAATAAATCATCTTGTTTAAACGAAATAAATAATAAAGTTGGTGATGGGAAAGGTCATAAGCAAAATGAGATAAATAACAACGTGCCAGAAAAAAGAAAAAGTGGTGATGATAAGTCCGGAGTGGATTCTAAGAATAAAAATGAAAAAGAGAATTTGGGTTCAAATAAAAAGATAAATATGTTAGATATGTTTTTATCCAAAGGAGAAATGTATAATAAACCTAAAATAATAGATAATATAAATAAGGAGCCGATAAATGGAGATATGTTATCTACGGATAAAAATATGAATGTGAATAAAACTAATAAAATGCATAATCTTTTTCTTGATGAA…	1647	861	0.129047
PF3D7_1223700	PF3D7_1223700-e1o2	ATGGTTAGTAAAAAAACGATAGAAGCTAGAAAGGCTTACTATAACGAAGACGTAGTTCTTTCAAAAGAAGCTCACGATTTTTATCACAACTTAGATAAGCATGGTGAAAATCACAATCTTGATAAGGATAACTTAAAAACAATAATATTTGGAAGTTTAGATGGTATAATTACTATATTTGCTATAGTATCAGGTTGTGTGGGGGCAAAAATTACTCCTACCCAAGTTATTATTATAGGTATAGGAAATTTATTTGCAAATGCCATATCAATGGGATTTAGTGAATATACTAGTTCAACGGCACAGAGAGATTTTATGTTAGCTGAAAAGAAAAGAGAAGAATGGGAAATTGAAAATTGCCCATCTGAAGAAAAACAAGAAATGATTGATATTTATATG…	702	878	0.128062
PF3D7_0801000	PF3D7_0801000_e2s2	AGAAACTTTGATGAAAGAAATCAACAGGTTAATGACAGAAGAAACTTTGATGACAGGGATCAGAACGTAATGGATAGAAGAAACTTTGATGAAAGAAATCAACAGGTTAATGACAGAAGAAATTTTGATGAAAGAAATCAACAGGTTAATGACAGAAGAAATTTTGATGAAAGAAATCAACATGTTAATGACAGAAGAAATTTTGATGAAAGAAATCAAAATGTTAATGATAGAAGAAATTTTGATGAAAGAAATCAAAATGTTAATGATAGAAGAAATTTTGATGAAAGAAATCAACAAGTTAATGACAGAAGAAATTTTGATGAAAGATATCAAAATGTTAATGAGAGAAGAAATTTTGATGAGAGAAATCAACAAGTTAATGACAGAAGAAATTTT…	1752	808.5	0.12573
PF3D7_0626100	PF3D7_0626100_C	ATGCTCGAGATGCAGATTAAGAACAAGTCTATTTCGTTCGTGGGAGTCATGCTCACCGATCCGTCCTTCCGTCGTTTCATCAACTTCTGCATTATCAGCGCGATCATCTGGTTCATCCCGCTGTACAACGTGTACGTGTACCTGTTCCTGAATAATTACCGCCACCACTTGACGGTGCACCATAAGATCTACGAGTATCTGACGAACGGCATCATCATCACCACTTTCTACTTCATGCTGCGTAAGAAGAACGTAGGCGGCACCGTGAAGGACGTGCTTAAGAACAAGAATAAACTGCGTGGGAAGGTCGTGATTATTACCGGCGGCTACAAGGGCATCGGGTTAGCAGCGGTAATTGAGTATGTTAAGTACGGTTGCGAGATCATCCTGGCGTGCCGT…	1232	808.5	0.125568
PF3D7_0812100	PF3D7_0812100_e1s2	GTCTATAAAAGTTTTACAATTTTCTCTTTTCTGAGTATTTTATTTTCATACATATCTATTGTAAAATTAGATACTTGTACAAATGATGATTATACTTTAGCTATTGATGAATATAAAAAAATGATATCTTTATTTAGTGAGGATAATAAAAAAATGTTGAATAAGGAAGATATAAAAAAATTATTAATAGAAAGAAAAGAATTGATTGATTATATGTGTTATTGGGTATATGAATTTTTTGATAAAATTCTATATTTCATTAAGTTTTCCAAGAGTCAAAAAAGTAAAGATAGTAAAAAACAAAATGGAGATAATAAAGACAATAAAATAGAAAATGATTTATATACAGGATTAAAGACAACAATAATCTCTTTGTTTATTCATTTAGATCATAAAATA…	2691	858	0.124705
PF3D7_1209700	PF3D7_1209700	ATGGAAGAAAACAAAAAGATAATGAATATGAAAGAACATCAGTGGAGGTTGTTTGAATATAATATGAGTAAATGGATGATAGAAAATAAATATATATTAGATCAAGAAGAAAAGAAGAAATTTTATAAGTGTGCTAATTATAGTATAGGTAGCGGAGTCCTTAATGCTTCCTTAATATATTTCTTATGTAAAAAATACAAGAATTATATAACACCCGTATCAAGATTTTTTCTGACATTTTCTTTGGGTGTTTATACATCTATGGTTATAAATAAAATATATAGGAGAAAGGCCTATATAGAGATATTAAGTTCTAAGACTACTATGACCGATAAAGCAAAAGAAGTTTTAAACGATATACTAAATATTAATGAGGATAATATTAAAGTATCGCCCCAA…	642	810	0.12387
PF3D7_0529400	PF3D7_0529400_e7s1	AAGAAAGAATATGATGTAAAGTCCAAAATGAGCGACAAGGAAAAAGAAATAAAAATGGAAGAACATAATTTAATATGCAAATATTGGGAAAAACAAAGTGAATGTATGAGTATGTTAATAGATGAGTGGAATAAAATTTCAGATATACTTGAATCCATTAATATTGATCCCAATAATATTATGAGTTCTTTATTATCATTATATGGAGAAAAAACAGTTAACGATTTTCATTTATCTCTTGAAGAAATAAAAAAAGCCAATATAGAATTAAACGTAAATACTGATGATATAAGTATCCCAGAAATTAATGAAGAAGATATAAATAAGTTTGATCCTTCGAATATGACTATACTAAATTTAATAGAG	366	884	0.123214
PF3D7_1469200	PF3D7_1469200	ATGAATGTAGACAAAATACTTTGGCTAACCATAATTACCTTTTTGGTTAACATTTTTAAAACTCTATGTTTATCAAAAAATAAATATCTTTTTAAATATTTAATAGTGGACCGAAAAAAGTTGGATCCTAGTTATACATATAAATATGATAATATACAATGGAACCATAAAATAATAGCCATCGGAGATATCCATGGGGACGTAGAGAGTTTAAAATTAATATTAAGACATTCAAATTTAATAGATGAAAATGATGAATGGATTGCTGAAGATGTTATGTTAGTCCAGGTAGGTGATATATTAGACAGGGGTGTTTTTGGTACATATATATATGATTATCTATTAAAATTACAAAAAGATGCCATCAAAAAAAATAGTAAAGTTATTTTAATAATGGGT…	1074	860	0.122792
PF3D7_0301700	PF3D7_0301700_e2s1	AAATCATATTATGTATATAAAAAAGACGGAAGAAGAAATAAAGGAAAGAAAATATTAGGTATAAGAATTAATAAATCCTTAGCCGAAATGGATCATACAAAATATCACCCAGAATATTATGATGAAGTTCAAGAAAATTATGACCCTTATTATGGAGTTAATCAATATAGTGATGAATGTGAATCATACAAATCCGAAGATGATGATTCTGAAGAAGAATATTATAATAGTACGCCTCGTGTGACTGTGTTGGAACCCCAAACGGAGAATAGTGAAGATGAGGAAAATTATGAAAAGACTATTGTAGATGAACTTAATGAATTACCAAATGATAAAAAAGCTTTAATATTATCTTATATAAGAAATGGAAATGATAATAATATGCAATTATTACCGTAT…	768	874	0.122678
PF3D7_0604400	PF3D7_0604400	ATGAACATCTGCTACCTGTTCATCTACATGTTATGCTTATTCATGCTGCACGGGGAATTACTGTTCTTCTGCAAGAAGCACGAGAACATTAACAAGCAGAAAGACCTGAAGAAGAAGGAGATCATCAACAAGATTAAGAACAAGACCAACGACTTACGCTACATGTTCGACAACCTTTACGTACAGCACAAGAACACCCCGCTGTATATCTTCCTCAAGGACCACAACGAGGAGAAGCGCCATCTCCTCAAGGTGATTTTCCTGTACGGCAAGCTGCACTCTCTGCAGGGCCTGAACACCCCGTTCTCAAAGTTCTACATGCTCTACAAGAACAAGAAGCAGATCCCGAGTACCATTCGCCTGCAGAACAAGATCCGCGAGGAAAAGAAGTTTATCGAC…	534	863	0.122051
PF3D7_1346400	PF3D7_1346400_e1s3	GATAAGAGGAATTATAATATATGTTTATTATGTGAAATTCCAAGAATGTATTATATTTTTTACCTGAAAGATTTAAGATTATTTTTGGAATATTTAGATGATGGTATATTAAATGTTTTTATTAGTAAATCATATAAAAAGGTAGTTCAGGCTGCTCAGACCAAATACTTTTTATTTAATTTTACATTTATGGATCCTATAGTGATCATACCTGAAGATAAAAATATGATATATAATTATAAGGGAGAGGTGAAAAATGTTTCTAGATATTTTAAGAGTAGCACTAGTAATAATAACACAAAGGAAAATGAGGACACAAATGATATTGCAAAAAGAAGCTCAAAGGAATATATTCTTTCCAATGAAAAAAAAGATACAAAGACTGAAGCGTGTAACAAT…	3039	855.5	0.121706
PF3D7_1323500	PF3D7_1323500	ATGAATAATTATTTTTTAAGGAAAGAAAATTTTTTTATATTGTTTTGTTTTGTTTTTGTGAGTATCTTTTTTGTATCAAATGTAACAATAATAAAATGTAATAATGTGGAAAATAAAATTGACAATGTTGGAAAAAAAATTGAAAATGTGGGAAAAAAAATTGGCGATATGGAAAATAAAAATGACAATGTGGAAAATAAAAATGACAATGTGGGAAATAAAAATGACAATGTAAAAAATGCTTCTTCAGATTTGTATAAATATAAATTATATGGTGATATAGATGAATATGCTTATTATTTTCTAGATATAGATATAGGGAAACCATCGCAAAGAATTTCTTTAATTCTAGATACAGGTTCATCTTCGTTAAGTTTCCCGTGTAATGGTTGTAAAGAT…	1770	860	0.121444
PF3D7_1463200	PF3D7_1463200_e2s1	GTTGAAAAATATAGACCAAATGTACTAAATGATATAATATCGCATGAACAAGTAATATCAACTATTAAAAGATTCGTTCAGAAAGGTGAGTTACCACATTTACTTTTACATGGTCCCCCAGGTACAGGGAAAACGTCTACGATATTGGCTGTGTGTAAAGAATTATATGGAGATAAGAGAAGTTCATTTGTTTTAGAATTGAATGCTTCTGATGATAGAGGTATAAACGTTATTCGTGATCAAATAAAAACATTTGCTGAATCAAAAAATCATTATACAACATGTGAAAAAACAACTTTAAAATTAATTATTTTAGATGAAGCAGATCATATGACATATCCTGCTCAAAACGCTATGAGAAGGATTATGGAGAACTATGCTAAAAATGTGCGTTTTTGT…	987	876.5	0.120942
PF3D7_1021400	PF3D7_1021400-S2_C	ATGCTCGAGGGAAGCATCTTGTTCGCAACAATGTATACGGAACTGTTCTTTCTGTTCACCTCGCTCTGGAAGAGTAACATGTACTACCTGTTCGGTTTCCTTTTCTTGGTGATTTTCCTGCTGGGACTGCTGAGCGCGCAACTTAGCATTGCGCTGACCTACTACACCCTCAGCTGCGAAGACTATAACTGGTGGTGGAAGAGTTTCGTCGCGCCCGGTAGCAGTGGTCTTTTCCTGTTCCTTTACAGCATCTACTACTTCTTCATCAAGCTCAACATCAGCACCTTCAGCGAGACATTCATCTACTTCGCGTACAGCTTCATCATGAGTTACACCTGCTTCATCTACACGGGCACGGCGGGCTTCCTTGCATCCTTCGCCTTTCTTCGTAAGATCTAT…	491	856	0.120876
PF3D7_0905300	PF3D7_0905300_s7	AATATGGATGGTAATAGTTCTAATAATGCTGGAGATATAAATTCATGTAAAAATAATACGTCTGTTACAGATCATAATATAAGTAATAAGAATAAAATTGATTTACATAAAAAAGGAGCAGGGAAAGGTAAAATCAGTTCAACAAAATGGCTATTCAAAAATGAAAAGTTATACAAAAATATTATATCTTTATCCAACCATTCCTTTGGAAATGATAAAAATAATCGATTTTTTTATGATATATTAAATGTGATTCAATTAAATGAGAACACATGGAAAAATTATTATGATATATTAGACATAGAGAATAAGAATATACCTTATTATAATGAACGTTTAGATGTTAATAGTCAAATTAGTTCTTTCATAAAATTGTGTTTAATTCGATGTTTAAGAGAA…	2658	856	0.120709
PF3D7_0319200	PF3D7_0319200	ATGAAATGTCAGATTTTCTACAAGTGTCTCTTTGTTGTAGTTATATTTTTGAGTGAATATAATACAATTATGCTTAGTACCAGAAGAAATAACCATAATACCATAAAATACATATTTAATGATAAACTCAATTTCCATGAAAAAGAAAAAAAAAGTTATACATTTCCATATATAAATGTTATAAAAAAGAAAAGGAAGAAAACACAATCATGTATTTTTTCCTCTCCTATAAAAATTAATTTTAATAACTTTGTTTATAAATCAAGAAGAAACATATCTTCATCTTTTCATAATTTATATAATACAAATCAAATTGATACTAATATAAATAATATTAATAAAAAGAGATTCTCTGATCCGTTGCACTTTTTTATACATTCACATATATCCCAACGAATA…	2718	864	0.12038
PF3D7_0911900	PF3D7_0911900_e2	GATAATAACAGCTACTCATTTGAAATTGTGAATAGATCTACGTGGTTAAATATAGCAGAGAGAATATTCAAAGGAAACGCTCCATTTAATTTTACAATAATTCCATATAATTATGTAAATAATTCTACAGAAGAAAATAATAATAAAGATTCAGTTTTATTAATAAGTAAGAATTTAAAAAATTCTTCCAATCCTGTTGATGAAAATAATCATATAATTGACAGTACAAAAAAAAACACATCGAATAATAATAATAATAATAGTAATATTGTTGGGATATACGAATCTCAAGTACATGAAGAAAAGATAAAAGAAGATAATACACGTCAGGATAATATAAATAAAAAGGAAAACGAAATAATAAATAATAATCATCAAATACCAGTATCAAATATTTTT…	1173	804.5	0.118611
PF3D7_1346400	PF3D7_1346400_e1s5	TTGAATTTATATACAAAAGGTTGTGAAAATGATGATGCTAATGAGGATGTCAATGATGAAGAAGAAGGGTCTTATGATAGTTCTTCTGATAGCTGTGAGGATTATGAATCAACTGATGATACCCATTCAATTGATGAAAGGGATAATTTGAATTATGAATATTATTTTAAATATAATAAGAAAAAGAAAAATGATTCAAGTTCTATTTTTTCATCGAATAAATTTGTTGGACCCTTTTTAAGAAACACAGAATGTGTAATAATAAATTTGATTAAGAATAGTTGTACATCATTAACTACATCTTTGAAAAATAGCAACGTTATACATTTATTGAAGCCTGGTGATTTTGTGTTTGATGAAAAATATAAATATAATTTTTCTAGCAAAAAGACTAATGAA…	3039	861.5	0.117861
PF3D7_1222100	PF3D7_1222100	ATGGAAAGGAATTTATTAAATAAAGATTTTTCCGTAAAGAAAAAGTATCAATCATATAATTATAATATATACAAGAATAATAATTATGAGATCGCTCCAAAAAAGCTATATCATTTGTTAATACGTTTAGGTATAACATTCTTAACTATATTTATAGTTTCCATATTTATAAAACATAATAAGTTTAACGAAAAAAATAATTTGTTTCTTATGGTTACTAGTCCGGATGTGTTAGAACTATTTAATTGTTTAGGATTTCCATCTAATAGTAAAGAAATAGTATATGGGAAATTAGAAAACTGGGGATTTAATTTATCTGACATTGGTGATATAGAAATAAATAAAAATTATAAAGATGAAGATTTGTCTACTTATAAATATTCTATAAATACATATAAG…	1554	804	0.117584
PF3D7_0109100	PF3D7_0109100_e2s1	GGAAGAGAATGGTGTTATGTCGAAGTTCAATTACTAGGAAAAGGTTCGCGCGATTGGGATTATTGTAGGGATTCGATAAATTATGACAAGTTAAGGTTGCATGCTAAAAAGGTGTTTGAAGAAAAATCTTTAGAAGCAGACAGACTTAAGGATAGATTACATGTATTGAATAGTAGAGTATATAGTATGTTACAAAAATATGATTCTGTGTGCGGAAAAAAGCATGAACTAATAAATTCCAGGATTGAAAAGATAAATGAATGGTTAGATAAGAGTTCAGAATCTATTATGAAAATAGAAAACAATACTAATGATTTAAATTCAACAAAAAGTATTATTGATCAATTACAAATAGATATTAAAGAAGAAAATAAAAATGTGAAACAATCTGAAGAAAAT…	2874	803.5	0.116816
PF3D7_1304500	PF3D7_1304500_e1s1	ATGAGCGAAAATAATTTAAGCAAGGATAATAATAAGAACAAAAGAAACGAGGCCTTAGAAAATGCTGGTATGTTAGATACTTTTTTTGAGAGTATGTATGATCATATGAATCGTCTTGATCAATATCATAGTGATATGAATAGAATGATGAATTCTTTAAGAGGTTATTATATGAATAATGACTTTTTTAGATTTTTTCCTAATAGGAGATCTTTAACAGATTATGATATTAATCGTAATAGAAATCATGATTTACTTCTTTCGAAACCTTTTTCATCTATGTTTAGAAGAGATGGATATTCAAATGTCCCTGCTATGGATGTTCTTGATAAAGAGAAACATCTTGAAATAAAAATGGATGTTCCAGGGTTAAATAAAGAAGATGTACAAATCAATTTA…	633	856	0.116325
PF3D7_1122600	PF3D7_1122600-S2_C	ATGCTCGAGCATCTCAACAAGCAGATCTTCTACATCGACATCATCTGCAACTTTAGCATCAACTACAAGATGTGCCCCCTGAGCATCAATCACATCTACCGCTACAAGCACCTGATCCACGACAAGGAGACCATTTACACATCATACTACGAGAAGAACGACTACATTGATATTTGGGATTTTCCGGTAGAGTTCGACACATACGAAGATACCGCCTATGACCTGCTGAACGAGATTATGGAGATTAACCAGAAGGACATCTTCATTGTGCCGAAAGAACTGGAAGTGCTGGAGTTCGAAGAGAAAGACATCATGATCATGAATAAGACTCCGATCGAGTACACCTGCGTCTGGACCAACGGGCTCAACAACAAGAAGAAAGAGCACAACATCTTCGAT…	1583	860	0.11593
PF3D7_1120600	PF3D7_1120600_e4	GATATCAGGGAAAAGCTCGAGGAACTTGAAGAACAAGATATGATAAATGGGGTGTTAGATGAAAAAGGAAATTATATTTATTTATCACAAGAAGAAATTAATAAATTATGTTTTGAAATTCAGTCCAAAGGGAAAGTGAATACGCATGATGATTTTGTAAAAATTTGCAACAAGGTCATATCGTTAAGTGTTAATGATAAGGTAAAAAAAAAAAATAGACATGTAACTATATATATATATATATATATATATATATACATATATACATACATATATGCATACATATATACATACATATATACATACATATATATGATGTTCTTCTTTGATGTGTTCAAAGGTGTTATATTTATAAATTTTTCTTATATTTTTATAGGACATGGAAAAGTTAAAGGAAGA…	414	853	0.115716
PF3D7_0904400	PF3D7_0904400	ATGGATAGCTTCTTAAACCGCTTAAATGTGTTGTTTTATTCTATGGCCCTGTGTTTTTTAATATTGTGTGCGTTCAATTATGGAACATCTTTTTATTTATTTGATGAGAAAGAAATAAAAACCAATATTCAGGTGAAAAGTATTAAAAGATTTGTATATAATAGGTACATAAATGCTGATGAAGCAGTATTATCTTTAGATGTTTCTTATGATATGAGAAAAGCATTTAATTGGAATTTAAAACAGCTTTTTGTTTATGTTTTAGTTACATATGAAACGCCTAAAAAAATAAAGAATGAAGTTATAATTCAAGATTATATTGTTAAAAATAAAAAGCAAGCCAAAAAAAATTATAGAAATTTTATTACAAAATATTCACTTAAAGATTATTATAACGGA…	555	854.5	0.115595
PF3D7_0905300	PF3D7_0905300_s2	ATAAAAAAAGCACCTACCCCTGATGAACATATTTATGAAAAAATTAATGATAAGGTTCAAATAGTTAGTTCGTTACAACAGCAAGTTTTAGAATTGTTAGAAGATTATGAAAAAAAAAAAAACAATGAAAATGTAATTGCACATAAAAAGGAAGTTTTATCTATCGATAAAAATAATCATGTATTAAAAGAAGATGTACCTGATGATGAATATAAGGAAGAAATTGAATTAGAAAAAGAAGAAAAAAACAATTTTAAAGATAAAGAAGAAGAGGAAAAATTAAATGAATTTAATAAAGAAGTAAAAATACAGAAATCAAAACCGAAACCGAAAAAGAATTACAACAATAATATATATAATAATAATAATGAGAAGAAGGAGAAGGAGAAAAGGAAAAAT…	2670	802.5	0.114714
PF3D7_0409000	PF3D7_0409000_s2	TTTTGTGATGAACATAATGTTAATAATTGTTTTATTTCCAAAATATATATAATACGAAATATACATAATTATTATATTGTATTAGAAAAGAATACAATAGAAATAAATCAAACAACGAAAGCTTATGTTTACATGTATTATGATATAAGTAAAGGTTATAAAGAAAGAAAATATAGTTTATTAAAATATGCACATAATAAAAAAAAACAAAACAAAAACAAAAATAAAAATAAAAATTTAGGTTTGAATGTAATACATAAAAATCAGAAGAAAAGAAATGATAAAATGAATGAAAAAAAAAAAAAAAAAAAAGAAAAAAAAAAGGATGATTATTATAATATTTATAATAAATATGATATGTATAATAATATATACCATAAGAATGATATCAATCATTTG…	2607	861.5	0.114413
PF3D7_0702300	PF3D7_0702300_e2	AATTTAAAATGTAATTTTTATTATAATAACAACAACTTATCAACATACGTTATAAAGCATAACAGATTTTTATCAGAATATCAATCGAACTTTCTTGGTGGGGGATATAGTGCAGCTTTAAAATTAGTAAATAGTAAAAAATCCGGAACAAATGTAAATACAAAGTATAATTCAGAAAATACCAATACAAATAATAATATACCAGAAAGTAGTAGTACATATACAAATACAAGGTTAGCAGCAAATAACAGTACAACTACAAGCACTACAAAAGTAACAGATAATAATAAAACAAATATTAAATTAACAGGAAACAATAGTACAACTATAAATACAAATTCAACAGAAAATACTAGTGCTACCAAAAAAGTAACCGAAAATGTTATTACAAATCAAATA…	1710	858.5	0.114321
PF3D7_1120600	PF3D7_1120600_e1s3	TGTGATTTTATTAATGATAAAGAAAATATAAATAAACGAATAAGTGAAATATATGACTTACGTCAAATAAATCATAATGAAAGTAATATAGAGAACATGGAAAATATAAAAAATATGGAAAATATAAAAAATATGGAAAATATAAAAAATATGGAAAATATCGAACATATAAAAAATATGGAAAACATGGAACATATAAAAAATATACAAAACATCGAACATATAAAAAATATTGAAAATATACAAAATATACAAAACATGGAACATATAAAAAATATTGAAAGTATACAAAATATACAAAACATGGAACATATACAAAATATTGAAAATATACAAAATATTGAAAATATACAAAATATTGAAAATATAAAAACTATCGAAAATATAAAAAAAAACATA…	2448	854.5	0.113693
PF3D7_0307900	PF3D7_0307900-e1o3	ATGAAAGAGAAAGAAGTGGATAATTTATTTCCAGGGGACAAAGATGTTACGAATTTAAAACAATACTTCGAAGGTGGTGATATAAAATTTGAGAACGCAGAATTAAAAAAGGAAAGAGAAGAAATACGTAAGAATAAGGTGTTTATAGAATGTGTACAGAATATTTGGATGAATATTTTGAATAAGAAGATGGATGATAAATTTAGTAAAGTTGAATACTTTAAAATAATGTTAAGAATATGTAAAGTATTAATTCCTCAATTTGATATAAAAGAAATAATAAAAATTGTAAATGATGAATGGATAAATGATTCTGAAGGAAAGAAATATTTGAATTTTTCTTCTTTTTTTAATGCATTTTTTGAATTATCCGATATATGGACACCAACAATAAATGCA…	918	857	0.112602
PF3D7_0618600	PF3D7_0618600_C	ATGCTCGAGATGTCATTCCGCACTCGTGCCTCAAACAACTTCAACAACGACTACAGCCACGACAGTAACTTGCTGATTAACAAGTACACAACGTCTTTTAACAATACCTTTAAACGTGACATTAAGTTCATTCAGATTCTTTTCCCGTCCTTCGACCTTTACTCGATCACATTCTTCTTCAGTCTGCTTCTGATCTTCCTGTTCGTGGTGATCGACATTATTTTCTTCAACTTCAGCAGCCCGTTGTTTATCAACGAGGACGTTTTGAAGAAGATCGGCATTAACCGCTTCGCGGTCTCCAACAACTATCAGTACTACAAGCTCGTTACGGCGACTTTCTTACACAGTAACATTTGGAACGTTCTGATCAATACCTACTACCTTATGAACATTGGGACC…	905	805.5	0.112533
PF3D7_0529400	PF3D7_0529400_e3s1	AAAGGAGCCCTGACGATTATACGACTTCCTGCGGAGAATAAGAAACAAGTAAAAAAAAAAAAAAAAAAAAGTGTAGAAGATAGTCGAAAATCACTAGTAGATATGTATAGTTCAGCTATACCAATTAGTGATAACGTAGATCCTAATGTATTAAAAGCGTTATCAAAAGATGAAAATTTAGATGAAAAGGTGTATGCATTAATACCTAAATCCGTAGTAGAAATTAATGAATTTGATGACATTACACATGTAACTTTAAAATCACCATCTCCACTTTTTGTTAATCAGAATATGAATGTAAAGCAACATATAGTTACAACGAATTATTATAAGCATGAGGACATACCAAACATAGCTTCTTGCGTAGTACCATTATCGGACGAATCGTTAAAAGAA	396	852	0.112048
PF3D7_1412500	PF3D7_1412500_e2s1	GGTATCGTTCTTGATAGTGGAGATGGAGTGAGCCACACCGTTCCCATATACGAAGGCTATGTATTACCCCATGCCATAAACAGAATTGACATGGCTGGAAGGGATTTGACCTATCACATGATGAAATTGTTTACAGAGAGGGGTCATACATTTACCACAACAGCTGAAAGGGAGATAGTTAGGGATATAAAAGAAAAACTATGTTACATAGCCATGGATTATGATGAAGAACTAAAACGTTCTGAAGAACATTCAGATGAAATAGAAGAAATATATGAATTACCTGATGGAAATTTAATAACTGTAGGAAGTGAAAGATTTCGATGTCCTGAGGCCTTATTTAATCCCACATTAATAGGTAGGGAATGTCCGGGTTTACACATAACAGCGTATCAAAGT…	681	800.5	0.110941
PF3D7_1302000	PF3D7_1302000-e2o2	GATTATAGGGACAATGGCAATAATTATACCCTTGAAAATATACTAGAATCAAGAATTAATAGATCTTTATCAGAAAAGCAATCTCATGTTACTAATTCAGCAACCGAAGTAGCTGCACAAGAAAATAATAGTACAGAGGAAAAAAAAAACAACCCCCCCGTAGAACAGCAACAACAACAACAACAGCAACAACAACAACAACAGCAACAACAACAGCAACAACAACAACAACAACAACAACAACAACAACAACAACAACAACAACCAAATGAATTAAATAATTTTGAAAATAAATTAAAAGATTTAAAAGATTGTTTATTCGATAAACTTGATAATGCCGTTGATTGGGAAAATCTTTCTAGCAATGTTAAAGGATATTTGGAAAAGGTTGATAGTACT…	726	800	0.110434
PF3D7_1347800	PF3D7_1347800_C	ATGCTCGAGATGAAGAACATCCTTAACAACGACGAGGTGAAGAACATCATCGAGAAGAACGAGGGCTACTACTCGATTATCGAGCTGAACGATGTCTTATACCTGAACAACAAGCTGTACACTAAGATTGAGTGCCTGCAAAACCTTCACAACCTGAAGACTCTCTACCTGAACAACAATGCCTTAGAGAAGATCGAAGGGTTGGAGTGCTGCATTAACTTGATCGCACTCTACCTGAATTGTAACCAGATCAAGCGCATCGAGAATCTGAACAATTTAATCCGTTTACGTATCCTGAACCTCGAAGACAACAACATTTTCGTAATCGAGAACTTGGAGTGCCTGGATTGTCTTGAGGACCTGAACCTTTCTAACAACTGTCTGGGCAGCAAGGGCAGC…	851	856.5	0.110402
PF3D7_0509100	PF3D7_0509100_e1o1-s1	ATGACAGATGATATGAATGTTAATGAGAAAATAACTATAAATGAAGAGAAGAATGGGGAAAATAGGAATATGTTAAGTATTATAAATAATGATAAAATTGATGATAAGGAAAATAATATTCATAATGATGAATCTGGAAAAAATAATATTTTATGTTTAAAGGATGTAAAAGTAAATAGGAAAAGAATTATAATCGAAAAATTAGTATTAGAAAATTTTAAAAGTTATTCTGGTGTTAAAGTCATAGGACCCTTTTATAAAAAATTTAGTTGCATAGTAGGACCTAATGGAAGTGGTAAAAGTAATATAATAGATGCTATGCTTTTCGTATTTGGAAGAAGGGCAAAAAAAATTAGACAGAATAAATTATCTGACCTTATACATAACTCTAAATTTTCC…	1500	799.5	0.109633
PF3D7_0529400	PF3D7_0529400_e5s1	CTGAAATCCATTATCAGAGGAAACTCTCTAAGAAATAAAAGTGGCTCGTCATTGAGTGTCAAATTTAGGCTATCAAAGAATGAAGAGAAAAATGTTTTAACAGAAAAAACCGATTCTGTTGAAAAGATGAAAGAATTAAATAAAAAAATAGAGGAGCATATATTATCTGATGAATTGAAGAATTTAAAGATTGATAGAAATGTAACTGAAAGAAAAAGAGCATCGATATTTGATGATTCCAAAGCAAAACCAAGAAATGAAAAGAAAAATGAAACGAGCAACAAAATCGTCTTAGATTCAACTAAAGTAAAGAAAGCTACAGAAATTAAATTAAAAAAAATTCAACATGTTACAGGATTATTAGAAAAATATGATATACCTAATCCTTTTGAGAAATAT…	540	849.5	0.108869
PF3D7_1130700	PF3D7_1130700_e1o1-s1	ATGGAGAGAAGGGGAAAAAATCAAACCAACGATGCTACTCTTAACGAATTTGATGATGATACCTCTGAATTTAGTATGAACATATTGAATCATCCTAACACGGATGTATTAGTAAGTCCCATTAAAGTTGTGGACCATGATTTTAATAATTTTATTAATAATAAATGTTTAGATTATTCAATTGATTCTTCTTTAGATATTACTACTAGTAATTTAACAACTCTCAAAAGTAAAGGGCAACAAAAAATAAATAAGTCGAATCACGCAGTTCAAAATGGAAATAATAATATGGATGAGAAAATAAAGAAAAACACCATATTAGTAAATAAAGAGGAAAAGAATAAAAAAGGAGATGCAAATGTAAATGTTGCTCATGAAAATGTCGCCCTTCAAAATGTC…	1500	799	0.108731
PF3D7_0307900	PF3D7_0307900_e3o3-s4	CCAAATGATGCTTCTCAAGAGTATAGAAACAAAGAAAATCAGATAAAAATTCCTAATATTGATAAGAAGAATGTAGATAATAATGATAAAGTAGAAAAGGATAATTTATTAGATGATATAAAAAAATGTTCCTTAAAAAATAAAAAGATTATTGAATATCTTAAAAAATATAGTAATATATGGTATATTGATATTGAAAAATATCATAGTAAAAGTATTAAAATGTTGATAGAAAAAAGGTTGAATGATATATTGAGATATAGACAAAATTTATATCATCAATTAAATATGAAAAGGATAGATAAAATATGTGCTCAATTTTTAAGAGATAATAATTATATAAAATTTTCAAATTTTTATTTTTATTGTCCTGTTGATATAGATAATATTGTAGATATA…	1500	799	0.108684
PF3D7_1462500	PF3D7_1462500-S2_C	ATGCTCGAGAATATCTTAAACATGCTGAGCCAGCAAAACAACTACTACGAGATCGTCTACCTGTCGGGCCTTTTCTTGAAGCTCTTAGAGCTGCGTAACATCCACTACGATATTTTCCTCTTCGTCATCTGTTCCAACATGATCTCTATGATCACCGAGCACAAGAAGCAGAACGAGTTTTCGATCGAGGTTAAGCAGCTGTATCAGGTGTGCTCGCTTCTGCTGAAGTCCACGAAGAACAAAGATCTCCTCTACCTGTTCTTCTTATATAGCCACCAGCTGGTCGACAAGGACGAACATTACTGCAACTTGTTCATGGAAATTTACGGCCAGCTGTCAGAGGAAGAGCACAAGGCCTTCTTTTCGTCCAACGTGCTCGACCAGTGCTTCCGCAATCTG…	920	850	0.10826
PF3D7_0307700	PF3D7_0307700_e3s2	CTATTGAATGAATACAATACAATTGACGACCCTGATAATCTAAATAATAATATTAATAGGAATAGGAATATATATATGCATAAAAATCGAATTAGCAATGAACAAAATAATAAATTCAATCTTAATAATAATGAACTGGAGGCAGACGAAAAAAAAAATAAAATGGATAACATGTTTTATAATAAAGAGAGAAATTATTTAATAAATAATCAAGAATATAATAAAAATTATATTTATAGAAATGAATATTATAAAAACGAAAAAAATGTATATCTTGATAGTTATCCCTACGAAATGGTTGAACACAAAAACAAATACACATCTAACATGAATAATCAATATGATAATAAAGATTCTTCTTATTTATATGATGATGTTTCTTCATCTTTTAATAATAAA…	2559	857	0.107008
PF3D7_0512600	PF3D7_0512600_e6s1	AAATATGCTTCTGAAGATGTACAGAAGATATTGATAGGAAATAAGATCGATTTAAAGAATGATAGGAATGTAAGTTATGAGGAGGGGAAAGAATTAGCTGACAGTTGTAATATTCAATTTTTAGAAACATCAGCAAAAATTGCTCACAATGTTGAACAAGCATTTAAAACGATGGCATATGAAATAAAAAATAAATCACAACATGAAACTATTAATAAAGGAAAAACAAATATTAATTTGAATGCAAGACCAATTAAGGATACCAAAAAGAAATGTTGT	279	854	0.106827
PF3D7_1369000	PF3D7_1369000-S1_C	ATGCTCGAGATGGGGTTTAGCGAGAATCCGAAGTTTTGTCTGCTGATTAACAAACTGATTAAGAAGAGCAAGGTGATTGGTGTGTTTCTGTCTATCATCGGCGTTATCTTCTTCTTAGTCTTCAACAAATTCAACAAGAACGCGGAGCTGGATGCGCGTACGTTCACGCAGTTCGTCGGCAACAGTGTGCTGAATAAGAAGAACGAAAAGTTCTACAACGACACCAACAGCTACTTTATGAATTACACCTACGAAGGCAAAGAGGACATTATCAAACTGATTTACGACTACATCCGTAAGAACATTCTTGTTAACGTCGAAAACGAAATGGTGAAGATCAAGCTCACCGACCGCATCGAGCAAAACATCTTAATTAGCAACGTTGGCTGCAAGTACTGC…	1583	854	0.106715
PF3D7_0920700	PF3D7_0920700	ATGAGTGATAATGAAAGCTACATTTCTGCAGAAAATAACAAGAGTGATGATGGGAAAAAATCCAATGTAAACCTTGATAATTTTTTAAATTATGATATAGATTATTATATGAATGAAAAAAATAAATCAAATTATGTAGGAGTAGATATATTACAACGTATTGATTATTATAATATAAAGAGTGCTAATAATGAGTATATAATGAATGGAAATTTAAGTAATAATAATAATAATAGTCATTATCATCATAATATATTATTATATAATAGAAAAAAAGAACAAGTTGATATATTTTATAAATTAAAAAAAGAATTATATAATATAGCATATACAAATGAAGATAATAAAATAAATAATGTCGTAACAACTAATAATAATATAACGGTTCAAAAAAATTCA…	1779	797.5	0.10602
PF3D7_0726400	PF3D7_0726400_e6s1	TTACAACAACATGTTGAAAATGAACTTGATCATATTTGTAAAAATCTTCTTGATAAATCATATAATGATATAAGGTTTCAAATCGATATATATTTTAATAAATTGTGTGTAGATTTATTACAGATAAAAAAAAAAGAAAAAAAAGAAATTGATATATTTTTAAATTTTTATAGATTTATGGATAAATTTAATATATATCATTCAACAAAATATCAAAAATTAATTATAGATAATATATACAGAGTAGATATTTTAATTTTTTTCTTATTATTCATTCAAAATAAAAAGACAAAAAATAAAATATCATTTCAGCAAAAACGAGTGATTCAATATATAATAGTAAAAATTATTTTACTATTATTCTTTTATTTTAATAATAATAAATGTGAAACGTTTTTA…	2295	796	0.103304
PF3D7_0605900	PF3D7_0605900_C	ATGCTCGAGATGAACAACCTGAACATCCTGTTCTTTAACAATCTGGGCGAGAATATCCTGAAATTCTTCAATCCATCTCTGAAGTACGCGCGCTCAATTACGAAGAACTGGTTCCTGATGAATCCAACCCACTTCTTCATCGCTCTGCTGTCCTACCTGATTTTCGTGTTCATTTCCTACATTTACTACATCAAGTACGGGTCTAAGAGCCGCCACGACAAGACATTGGCGGCCAAGATCGCCCCAGCGATTACCCGCAGCCATAAGAGCACCCCGCTGGAACAAATGGTAGAGAAGCTCACCCCATCTTATAACCTGCTGCAGGTGCTGTTTTCGTTGATCATTACCCTGCTGACCGTTTATGAGGCGAAGAACCGTCGCTTCTCGTTGTTCTATAAC…	962	796.5	0.102971
PF3D7_1348000	PF3D7_1348000_e4o4-s2	TTAAAGGAGCTTTATAATTCTGTATATTGTTCAAATATTATAAAAAATAAAAATAATACAAATGATAAAGTTATAAATAATAATAATGTGTCATTGCACATGAAATATACAAACGATGACACTTTTAAGAATAACACAATACACAATATAGATAATAAAAATATTACATCTCTTGAACTATTTTGTTTTCTAAATTTTACCCTTGCAACGTCTATCCTTTTAATTATAGATACAGATATTATATTAGAATGTGCATGCGATGTAGATTTACAAATACAAATCGTTAAAAAATGTAAAGACATGATCAAAACAATTAAAGTTCCCAAGAAAATTACAAATCTTAGTAATATTCCTCTAAACAAATATAAAATGTCTTTTAAAAATTATATAGAACATATT…	1500	846.5	0.102717
PF3D7_0529400	PF3D7_0529400_e1s1	ATGAATAATTATAATGGTAGAAAAATATTTTCTAATTTAGAAAAAAAAGGAGATATGAATGATATACTTAAAATAAAGAAAACGAGAGCAGACAAGATATTTGCTTTTGACACATCAGGTGAGAATAATAATATTATAACAAACGATAAGTATATAAATAATGGAAATAGGAATGTAGATGTAGGAAATGAAAAGATGTTTAGTTATAATATGAAGGATATAAATAAAAAGCATTTGTTAAAAAATGATACATATAATAATAATGATTTTAATAAAAAGATATATTATGACAAACATAATAGTAATGAAAAAAATTATATGAAAGTAATAAATACAAATATAAATGATAATAAAAATATTTATGTAGATAAAAATTACTTTGATGAAAATAATTTAATA…	2694	861	0.102514
PF3D7_0508200	PF3D7_0508200-e4o4	CGAGTATTTGTAGATACGAGGTACAAATTCATTACTGTTACATCCTTTTGTATTTTATTTACGAGCTGGGGATTTTTAAGACTTTATATTTTTGTCAAGAGATGTATTTTACCTATACATCGTAACTTTGATATATTTATTAAATATCTTAAAGTCGAAACTTGTATCTGGTTAATTTTTTTACTCCTAGTCATATTATTGATGAACACATATTGGCTTATTCTTATGGCCAAGATGTTCATTCATTTTATTATGAGTGGTAAGACAGAAGACATACTCACAAGGGTTTCAGAGATGGAGCATATAGAAAATAAAAATAAAAAAAGA	327	796.5	0.101904
PF3D7_1102500	PF3D7_1102500_e1s1	ATGTCAGAAAAAAGTTTAGACGCTATGCCTGCTAGAAGTTGCCCCACATCTTTCTGGAATCCAAAAATGAAGCTTTTGCATAATATGAAAGCATTTTATATGTCATCATTTCAAAGATATATATATGTTTTTATTGCTTTTGTTTTTCTTATGCTCTTATTT	162	795.5	0.101504
PF3D7_1202200	PF3D7_1202200	ATGATGAAAAGAAAGGAAGTATGGGATTCAAGGATCAGTAGTCCCGTAACAAGGATAAAACATCCTCATGAACATAACCTATCATATTATAGCAAGTGCATGTTTGGAGGTATATTATCATGCGGTTTAACACATACAATAATTACACCTTTAGATGTGACAAAATGTCGAATTCAGACATATCCAAATATTTATAAGAATTTATTTCAAAGTATAAAGAAGATTGTAAAAGAAGAAAAGGTAAGAAGTTTAACCCTAGGATGGACTCCTACATTTGTTGGTTATTCTTTACAAGGTTTATGTAAATTTGGATTTTATGAAATCTTTAAAGATGTATATTCTAATTATTTGGGTGAAGAAAATGCATATAAATATAAAGGTGCTACATGGTTACTTGCT…	972	854.5	0.101464
PF3D7_0404500	PF3D7_0404500	ATGTATGTATTGGTGCTTATTCATATGTGTTACCATTTTACAATGAAGAGAAAAAAGTTGTTTGTATATTTTATTTTTTTGTCATTTATTATTAATTTTAATTTTAATATTAATATCAATTTTGTGTGTAGCAATGTGATTCAAGATGTTATAAGCATTGGTAATGTAGACATCTGTGTAGTGAATGTAAATTCAGATGAAGCTCAAGAATGCATATTGAATAATGAATTTGGGAAGTTGTTATTATTTGTGTGTAATATGAATGATGCTTTTAGTACTACGGCAAAAACTCACCCAGAAAATTGCCCTTCTAGAGCCTTTGTTAATCAAAGTAATCCAACCGAAAATTCCCCCGAGGTTGATACTTATAGTATTTATCCGAATTTATTTGGTACGAAC…	1434	850	0.101227
PF3D7_0702500	PF3D7_0702500_e1s1	ATGGCTTATCCTCTTTTAGAAGATGACTTAAGATCCATTAGGGTTGCTTTTGGAACTTGTCCTGGAAATAGCACAATGCAATTTGGAGAGAGATTTTGGCAAGGATTTTTTTTTGGTGTAATTATATTTTTTGTATTGTCTAAATATATACGTTCATATAAGAAGAGAAAAGGAATG	177	794	0.0996749
PF3D7_0411900	PF3D7_0411900-S1_C	ATGCTCGAGATGAGCAGCGTCTTCGACAAGTTAAAGAAGCAACGCAGTAAAGAGTGTAAAGCCACCGACTTCTACGAAGTCAAGAACAAGAACGACGAGATTTATGAGGTCGTCGACGAAGAGGGCTACATGAAGAACAAGCGCTCGCTGCAGAACTTCATCGTAGGCGGCGACAAGGACTTCGACAGCAGCGACGACGTTATCGTAGAGAACATTAACTTCACATTGCTTAAGAAGAAGAACGTCGACAAGGAGCCGAAGGTGAAACGTAACCAGACGTTGGACGACTTTATTCGCGAGAAGAAGCTTCGTAAGACCCTGTCGGGTAACAAGCTCTCGAAGGAAGAGATCCATAAGACGAAGAACATTGAGGAGTTGATGGACCAGAACACGTCGTCC…	1583	794	0.0993247
PF3D7_0529400	PF3D7_0529400_e6s1	GTGTCGAATAATTACTACAAGTTCATTGTGAAAAGTATGGAGAGAGCTGAAATTAAAGAAGTCTTTAATGATAAGAGAAAGAAAATGTTGTTAAAGTTAATAGTTTTATTAGGAAATCAAATAAATAGTGAGATAAAAAAGAAATTTATTGAGGCAAATGCATTTGAACCATCCAAAGAACAGGAGTTG	189	866	0.0984794
PF3D7_1205500	PF3D7_1205500_e1s2	ACATTTCTTAAGATAAAACCTTTTTCTAATCCCATCCCCTTGCCTATAGGTTCTATATTTAAAGCTGGTCAGTGTAAAATAGAGGTATGTTCTCATGACTCGGCTCAATTTATTCAGTACCCGGAAAGATCCATATCATTGCATAATACAAACAACCCCCCAAACACGGATAACAACAACAATAATAATAATAATGCGGATAATAGAAATAACGACAACGATAATAACAATACAAATAACAACAACAATAATAATAATAATAATAATAATAATGGTGGAAGTAATAATAGTAGTGGAAGTACAAACAATAATGGAGGAAATAACAGCGCAAATAATCATACTAATAATAATAATAATAATAATAATAATAATAATAATAATAGTAATAATAATAGTAAT…	2700	841.5	0.0969466
PF3D7_1452800	PF3D7_1452800-e3o4	TTAAATCTTATGAATACACATATAGAAAAGGTGAAGGAAGAGTTTACTAATTATAAAGAAAACAATGAAATAGAAAATAGAAAGAAGAACATTGAAATTTTACAGCTAATAAATGAAGAAAATGAAACATTAAGGAAGAGTATGGAAGTGTCCCTCAATAAT	162	792.5	0.0969184
PF3D7_0702500	PF3D7_0702500_e2s1	AGAATATTGAAATCTTCTTCCGTAACAAAAGGTAGATTATATCGTGGAACCGTATTCGATGAAGATGATAATGTTGACGGCCACCATAAAAAGACCAAAGCCCATGGATTATTTGAAGAAATTGAAAAAAGAAATGGATTTGATTTAAATGATGATACAACAAACAGTAATAATTTGGGTGAAGGAACTCATAGTGCAGTGCATAATTTAGATGGACAAAAGGAAAGTCAATTATATAAAAACAATTCAGATGGAAGTACAGAAAATCACCTATCTGGAAGTAATTCAGATGGAAGGAATTCATCTCAACATAGCGTAGGTAGTCACTCTGTTAGTAGTCAAGAACATAAGAAAGAACACAGTACTCATGATTTACCTGCAGGAAGAAATTATTCTTTA…	582	859.5	0.0966891
PF3D7_1444100	PF3D7_1444100_e9s2	GAAATGTTTATACTAAATAATTTGAATAATTACAATCATTTTGTTCATTATTTTTTAACAAAGAATAGCTATTATAATGTGGAGGAAAATACATTATATTATAAATATGGTTATGTCAATGAATATATAAATGAAAGAATAAAAATTTCTAACCTTACAGATGTTAATACTAATATAAAAATCGAAATGAAAGAAATCGATTTTTCTTCTTTAACTAATAAGAGTAAGAAAAACAAAGAAGCAGAAAAAAATAAAAAAAACGAAACGAATATTTCACCAAATTCGGATATAAAATATAATTTAAAAATTCAAAATTATAATGAAGAGAAATACAATTGGAACTGTAGTTATATAAAAAATGATAACCTTTCTAATAATATAAATGAACAATTTAGTAAT…	2340	848	0.0953113
PF3D7_1435300	PF3D7_1435300_e1s3	ATTAAAAAAAAAATGAAGAATAGAAAACAGGTCCTAATAAATGAAAGTTTTAATACTATTAAAAAGTATAAAATTAATTCCAAACAAGCGGATACTATAGAAAGGGTTAATGGACAAAATGAATATTTCATAAATGTAGAATGTGATGAAGCAGATGCGGAAAATGAAAGTGATCAGAACGACAATAATGAGGAAGAAGAAACGGATAAGAGTGATGTAGAGGAAAATATTGATAATGATGAAAATGAAGATATGGATCAAATTGATGATATAGATGAAGAAGATGACGAATATTATAATGATGGTAGTGATGATAGTGATGATAGTGATGATAGTGATGGTAATGATGATAGTGATGATAATGATGATGATATAGATGATTTAGATGATGTAGATGAT…	2373	843	0.0952876
PF3D7_1367700	PF3D7_1367700_e1o1-s1	ATGATTGTTTATTCCTTTTCCTTTTTGATATTCCTTTATTTTTGTTTATATTTGAATATTAAAGAAAGCATTATATTAGGTAATTGTAAGATTATATTAAGTAGGCCCTTTAAAGAAGAGAAGAAGAAGAAAGATATATATTTTTTTTTTAATTCTGGAAAGAATTTATTAAAAAGAAAGAAAAGTACCTTTGATTTGTTGCCTCTGCATTCAAATAAAAGGAGAAGAATAAATTTATTTATTAATAATGATAAAAAAAAAAAAATAAAAAGCAATAGTAATAATAATAATAGTAATAATAATAGTAATAATAACAATAGTAATAATAACAATAGTAATAATAACAATAATAATAGTAGTAGTATAAAAAGAGAATGTGGTGAACCATTTTTTTCTTTT…	1500	842	0.0949246
PF3D7_1236900	PF3D7_1236900-e3o3	TTGAAATATTTTATAGAAGAACAGGTATACACAAACAAATATATCAACATACACATTAGTGCTATATACACCTCCATATGTCTGTGGAAAAGTAATGGTACCAACATTATGTTAGACAATGAAAACAATAATAATAATGATGATAATATAGATATGATTCATATGAACAAGGAGCATAGTTGTATAGCTGCTCTGAAGGTA	201	791.5	0.0947524
PF3D7_1403700	PF3D7_1403700-e1o3	ATGGATAAGCAATATTTGCATACCTTAGAAGAATATTTTCTTAGCGTAAAGAATAAGGGATATCTTGAGCAATATTTGATTAACCCTAAATTAAGCAGATGGGATTTCATAATTTTTTTTGTTTTTTTTGTATTGATAACGTTGTTACGATTGGTAATTTCAGGTGTACAAAAGGAGGTAATAAGAAGGAATAGTATATTATATGGATTATCAAGAAATTCTATATTAGATAGAGTGAATAGAAAATATGATATATCCAAAAGTGGTTCTGTATATAAATGGAAAGAGAATTTTTGGTTTGCTTTATGGCATAGTTTTTCTTTTACATATAACTTGATTTTATTATTTGTTATGTCTGGGTATTTAAATAATAAGAATGGATGGATAAAAATGTGTTTG…	930	791	0.0942067
PF3D7_0519200	PF3D7_0519200_e2s1	AATTTAGGAGCTGCCTTTGGTACTGCTAAGAGTGGTGTAGGTGTATGCAGTGTCGGAGTAATGAGACCAGATTTAATTATGAAATCCATTTTGCCTGTGGTTATGGCTGGTGTTCTTGGTATTTATGGAATTATTATGTCCATTTTGATATATGGAAAAATG	162	848	0.0932775
PF3D7_0903100	PF3D7_0903100-e1o2	ATGGAGGAAACAGAACCGCAATTACCCAACATTTGTAATAAGTTAATTAATACACATAATTATTATGTAGATAAAACAACATTATATATAAAAACAAGATGGTTTACTTTGCTTGGTTTGTTTATTACCTATATTCTTAGGGTATATTATGTAACAGGCTTTTATGTTGTTTCCTATGCTTTAGCCATATTTTTATTAAATTTATTTTTGAGATTCTTAACACCTCATAATATAGAAGAAATATATGAACAATATGAAAATGAAAATAATGGTTTATTATTACCAATGAAACAAACACATGAAACTAAAAATTCAAATAATCCAGATGATAAAAAAGAATTTAGACCATTTCTAAGAAAATTAAATGAATTTAAATTCTGGTTATATTCTACAAGAGCT…	552	844	0.0927137
PF3D7_1466000	PF3D7_1466000_C	ATGCTCGAGATGAAAACTTACATCAACCTGTTCTTCCTGCTGAGTCTTCTCAAGGTGACCTTCATCTACTCTAAGGACCACGTTAACAACAACGAAGAGGATTCGAGCATTTACTACTATGGTTTCATTAACAATGAGGTTTACAATCACTACCTGCCATCCAAGTACGCGAACATCAAGCGCGACAACAACCTGATCAAGATCAGCTGCTCGAAGGGTTATACGGTCGAGGTGAAGCGTGCCTACATCGTAGACCTTGAAGACGAGGTAAACGACTACACTATCATGGCGTCACAGATCTGTCAGAAGAAAGAGGAGTGTAACATTGATATTAAGAAGTTTAAACGTAACACCAATAATAACGCCATCGATTTCAGCACCGAGCTGAACGTCGAGTAC…	1022	845.5	0.09269
PF3D7_0102200	PF3D7_0102200_e2s1	GGTAATCTTGGATATAATGGAAGTTCATCTTCTGGCGTACAATTTACTGATAGATGTTCAAGAAATTTATACGGGGAAACATTGCCAGTAAACCCATATGCTGATTCTGAAAACCCAATAGTTGTAAGTCAGGTATTTGGTTTACCCTTCGAAAAACCTACGTTTACCTTAGAAAGTCCTCCTGATATTGATCATACAAATATTTTGGGTTTTAATGAGAAGTTCATGACTGATGTAAATAGATATCGATATTCTAATAACTATGAAGCCATTCCTCATATAAGTGAGTTCAATCCACTTATTGTAGATAAAGTTCTTTTCGACTATAACGAAAAGGTTGATAACTTAGGAAGAAGTGGAGGAGACATTATAAAAAAAATGCAAACTTTATGGGATGAA…	1560	841.5	0.0918611
PF3D7_0518700	PF3D7_0518700_e2s1	GGGAATGATAACATGAACAACGAAGAATTAAAAAAAAAAGCAGAACAAGAAAATACTCATAACAATGTAAATATGAACAAACGAGGAGTACAAAACAAAAAAAATAACTATAATAAGGAAAACTATTTATCTCCAATATCGTTCACTGGAAATATTTGCAAAATAGCCAAG	171	837.5	0.0910264
PF3D7_0212400	PF3D7_0212400_e2o3-s4	CATTCATCCTTTATATCGGAAAATCCATATTATCATGTAACCAAGCATCTAGATTATTATAATGACCATACCTTTATGGAGTCTATGAAAGTTGCAACCAATAGGATTTATGAAAATCCATACTATAGGAATTATAATAAAGAACCGTACACCTCTAATGAACACAAAATTTTAAATAGTAATATGGATATTAACAATAGTAATCATTTTTTAAGAAGTAATGATGAAAATGTAAAAACAAACACAAATACAAATACAAATACAAATACAAATACAAATACAAATAAAAATTCTGATACAGATAATCATAATGATGCATATAATCATAATGATGCATATAATCATAATGATGCATATAATCATAATGACGCATATAATCATAATGATGCATATAATCAT…	1395	789.5	0.0909649
PF3D7_0409000	PF3D7_0409000_s3	ATCAAACCATCTCATTTAAATATATCCTATAATGAAATATCACACATAAAAATTTCCTTGTCCTCTTCATTTTATAATATGAAAGATTTACTTATTTTAAGACTAGAATTTTTTAATAAATATAATCAAAAATTTGTTAATCAAATGCCTTTACAACTTTTCAAAATAAAATTATTATATAATTATAACAAAATTAATTTAAATCTTATACAAAATGATTTTAAGAACTCTAATTATAATATTATCAAAAATATTAAATCTTTATTTGAACAACAAAATAAAGAAGATCAAGACATGATCCTTTCCGATGTATTTTATTATATAGATTGTCAAATCGTAGGTACATACTATATACAAATTGAACTTACATATGATAATCCAGAAATTAATAATAAGAAA…	2595	845	0.0903466
PF3D7_1315100	PF3D7_1315100	ATGTATTTGGGAAGTATAAAAAATTTCGAAGACGACTTTTTATGTAAAGGTGAATATAAACAGGTCTATTTATCCCTAGAACAAAATGAGAACAACGAGGCTATAGAAATAGATATATGCTGTGATAATAATATTTATGATATACTTCAATTTTGTAGAGAAAAGTATGGTATATATGGTGAATATATTATTGATAGTTGTGGTAATGTAATACATTCGATAAAAGATATAATAGATGGTGATACCTTATATTTGAAAGAAAAGAAAGAAGATATGAATTTCTTTTCAAAAATAAAAAATAATTTTATTGTAAACGATTATATAGTAGAAAAGAGAATAGGTTCTGGTGGATTTGGTATTGTATTTCAAGGTGTACATATACAAACAAAACAAAAGGTA…	1101	839	0.0893579
PF3D7_1478000	PF3D7_1478000-e2o2	TCGTATGAATATAATGGCTTAGTACATGTAAAATCTTTTAATAAGTATTCGAGAAATTTAACTGAAGTAAAAACTCCTAAGAATGAAAAATTTAAAAAGAGCTTTTTTAAAAATAAAAAAAAATGTGATAATGAAAATGAGGTAAATAATAAAGATACTAATAAAAGAAATACTGGTGAACCCAAAAGTTGTTGTAGTGGTAATTCTGAATCTAATCAAAATGAAAATGAAAATGATGATGCCACAATTGATATAAATTATAACGATATATCCATACAGTTGACAAAAGAGCAATTATTTGATGTACTAAATTCACTAAAAAAAGTACCACCAAAAGAAAATCTAATTCATTTATGGAATCATACACTTGGTGTAAATAAAAAAGGATTAGATGATTTA…	705	842.5	0.0889882
PF3D7_0501000	PF3D7_0501000_e2s1	AACGTATCATCCAAATCGATATATAATAAAAATAAATTCCATAACACGTTCAATAGAAGAGATACAAGAGTTTTAGCAGAGCAAGAAGATCAATACATAAGGAACCCAAATAATTCTAATTATCCTGATAGAGACCTTGACATCTGTAATTGGGATGAACCTCATAATCCTGAAAAAAATCCTTGTGCCATTCCACAAGACGATTTATCCAATGAAGGCATAGAAATAATTGATTATGTTGATAAAAAAGAAGAAGAGAAACTTAAAAATGATTTGAAAATACATTTTGGCAAACAACACTATGCATTAATTAAGGATATATATAAACCTATACAATCTTATGCAAACAATTTTTCAAAGGTCGTAGATCATTATGTTGGTAGTTTAAAAAGAATTAAC…	582	838.5	0.0886901
PF3D7_1134100	PF3D7_1134100_e1s1	ATGAAAGTGTATAATTTTTCATTCATATGTATAAGTTTAATTTTCGTTTTCATTAAACGTAGCTTGGGATTATATACAAATGTAGCAGAGATCGAAACAGTTGATAACCCTAAACGGTTAGAAGAATTATTAAATTTAAAAAAAGTGTATCTTGTTCAGTTTTATGCCACATGGTGTAGGGTTTCACGAGGTTTTTCTAACGACTTCATCAATATAGCAAAAACATTAAAAGATGATGTTAAATTTATAGCTATAAAAAATGAAAGTATATTAAATGAATACAAGATTACTGAATATCCAACAATGCATTTAATTTTTGGAAATGAACATAATAATAAAAAAGAAGTAGAAAAATTTGATGGAAAATATAAAATCAAAGATGTAGTTTCTTTTATATAT…	1269	837.5	0.0882659
PF3D7_1355500	PF3D7_1355500	ATGGTAATTGTTACTGAGAAAATAAATAATAACGTTAAGATAGAAGATAATAATATAAATAGATTTGAAGAAGATATGGACAAGAATGTTGATGAGGATAATGAAACTATTTATAAAATAAATGAAGAGAAAGTTAATATATGTAACAACATAGAAAAAGAACATAACCAAAAAGAAGATAAGGAAAATGTTATGTTAAACAACCATAATGTAGAAGAAGAAGAAGATATAAAAAAAACGGACGAAGTATTGATGAATGATGAAAAAATAAAAAATGATTTTCATTTAGAAATTGGTGAATATTCAAAAAACCATAAGTGTGATGATCCTTTGAATAATAACAAAACGGATCATTGTGATAAAGAAAGAAAAGATATTTGTCTTGAATTATTAAAAACA…	1974	836.5	0.0880646
PF3D7_1023100	PF3D7_1023100_e1s6	TTATCTACTGTTGATTCAAAAACAATTATAGATAATATTTCATTAATTAATAGTTTAAAAACTACAAAAGATACTTCTATTAATATACAAAAACAAGTTGCAGATTCAATTAATACAGAAAATGAAATTAATAAAACTAGAGAATTATATAGAACTCTTGCTAATGAAGCTTCTATTGTTTATTTTATTTTAATACTTATGCATAATATTAATTATATGTATCAATATTCTTTGGATTCTTTTATTAATCTACTATTAAAATCTATTGAAGTTGTTAATAGTGATAGTATGAAAATGTTATCTAATAAAAACTTAGATAGTCAAATATCAAATAATAATCATATGTATGATGATGATGATAATAATAATAATAATAATGGTGAACATAGACATTTACAA…	2871	836	0.0872364
PF3D7_0402400	PF3D7_0402400-e2o2	GGAGGAGATAAAAATTTGAATGGTAAATTAGATTTTAAGAGGTCCCAAAGATTGAAGGAATATAGGATATTAGTTGAATTTTCAAATAGTTATTATTATGATGAGCCGAAAGTAAGAATTATTAATTATGATGATGATAAGAATGAAGAATATCCTTCAAGATATAATAATAAGAATTTAGAAGAATCTTTTGAAAAATATGTTGATAATTATGAATATAATGTGAGGGATCATATATCAGAAAATGTAAAATTAGGAAATGATTCTATAGGGGATAACATAAGTATTGTTGATTTTAATGGAGAAAATAATGTGGAGGTAACTTTTCCTGACGATAATATAAATGAAAAGAATAGAAATAATGATAAATTGGATGAACTTAAATCATATATAAATACA…	651	786.5	0.0858663
PF3D7_1232300	PF3D7_1232300-e1o3	ATGGTTGTTAAGAAATTAAAAGTAATAGATGATAAAGAATTAAAAAAACTTAAAACCGAATCAAAAAGTTGTATTGTAATTAATGATTTAATATATGATGTGAGTTCATTTTATGAACATCCAGGTGGATATGATCTGTTTAAAGAATATGAAGGT	156	786.5	0.0857544
PF3D7_1241700	PF3D7_1241700_e1s1	ATGGAGGAAGATTCATTCAAAAATAGATTACTCAAGAGAAATATCGATATATGGATAGAAAAGTACCGACCAGAATTTTTAGATGAAGTAGTAGGAAATCCTTTTGTAATAAATACATTGAAGAGTATTATTACTTCAGGAAATATGCCTAATTTACTTTTAGCT	165	853	0.0852435
PF3D7_1370300	PF3D7_1370300-e1o2	ATGGCAGAGCAAGCAGCAGTACAACCAGAAAGTGTTCCTACTGTTGGAACAGTTCCTCAAGCAGATGTACCTACAGAAGGTATGGATGTTCCATTTGGATTTTTTGATAAAAATACTTTAAAGAAGTTGATGTTTATATTTATGAGGGATGTTGATAACTATGCTAGGAATTGGTTTACTAATTTTATGCATGCACAAACAGAAGATGATGATCAAACTGATGGTGAAGGAAAACATGCATATTTGTTAAATCACAAGAGAACGTGGTTTGAACAATTTAAGGCTTCTCTTTCTGAAGCTTTAGATGGAAAGAATAGTGTATTCTTATTGTTATTTTTGTTTTTTGGATTTGTATTTTGCCTTTTATATCACGCCTTCTTATACCACTCA	390	838.5	0.0851454
PF3D7_0801000	PF3D7_0801000_e2s1	AATGTTGAAATATTAAAGAATGATTATAATACGCTAACAGAAAGTCATAATATAATTAATAGAAGGTCTAGAAATTTAGGAGCGAATCCAGAATCCATTAGTTTAGGTTATGAATTAAGTGAAAAGGATGAAGGAAATAAAAATGATCTAATAAATAGTGCTACAGATGTATCAACAGAATTAGAGAATTTAAAAGAACGTTTATTTCCTGAACTAGAATTATATACAAACGATCAAAATTCAAGAAATAATACTCCAAATTTACGTAAGGGTTCTTTGGGATTTGATAGTTTTAAAAAATTGGAATTAGGAACACTAAATCAATTTGATAAAGATAAAATGATTAATCTGAAAGATGAAACCAATATGAATGAATTTGAAGGATTTCTAGGAAGAAAT…	1761	786	0.0850419
PF3D7_0111500	PF3D7_0111500_e4s1	GGTAAAATCGTGCCGGTGGATATAACCCTAGAATTGATGAAAATAAAAATGGAAAGCGAAATAGCCAAAAGAAAAAAACAAGAACATAATGAATTAAATGACCAAGGTGAATCAGGAGTAGAAAAGAAGAAAGACAGTTTTTCTTTTAAAAAATTGGATGAAAATGCAAATATAAAAAATATAAATATAGAAGAATATAATAATAAATTAAAATATGTAAATAATATATATGAAAATAAAGAGGTCTTGGAAATATTAAAAAATAATAAGTGTGAACAAAAAGCAAAGTATAAATTTATAATTGATGGATTTCCAAGAAATTATGATAATTTTAACGGATGGATTAATATAATAGGAAATTATGCATATGTACATTTATGTTTATTTTTATATTGTGAT…	447	853	0.0849822
PF3D7_0812100	PF3D7_0812100_e1s3	AATGATTATTTTGAAAATAAATGTATTAGCTCATTTAATGGAATAATAGTAAGTATTTTAAACAATATGGGGTTAATAAAAAAAATTAGTACTGATGTGTATTTATTGAAAAAGTTTCTTAAAGTTATTATTAGAATTTTAAGATTAGATATACAGAAAGAAGATATAACTATGAAATGTATGAAATTAGTTTATTCCATTATTAATAATAGATTTATTAAAAAGAGTGTAGAAGAAAAGAGAAAAAAGAAAAAAATAAATAAACTTTTTTTATGTTTAAAGGAAGAAAGTGAAAAAAAGAATAATGTATATTCACAAATTGTTATTATGTCATTTTTAATTTGTTTTAATTATTTTGTAGTAGAGAATCATTGTGAATTTTATTTTAATTATTTAGTA…	2679	851.5	0.0847323
PF3D7_0826100	PF3D7_0826100_s8	AATGTAAACAGTGTAAATAATGTAAACAATGTAAGCAATGTAAGCAATACAAATAACATGAACAATAATAATAATAACAATAATAATAATAGTATTAGTAGTAGCAGTAATAATAACAGCAGTAGTAGCAGCAGCAATATAACATCAACTACCAACCGAAATATAAACGGTTCCAATGTAGCAAATTTAATTAACAATATAAGAAATAATATTCAAGTTAGAATTAGTAATCGTGCTTTGAGAAATGTATCAAACAATTTAAATAATAGTAATCATAACCATAATAATATAAATATTATAAATAATATAAACAACATTAATAGTATCAATAATATGAATATTATTAACAATAATAATATGATTGTGAACAATTTTAATAGAAGTAATAGAAATAGTAAT…	2913	852	0.08462
PF3D7_0709000	PF3D7_0709000_e3s1	GAACGACACCGAAGCTTTAATTTACAATTTTTTGCTATATCCATGTTAGATGCCTGTTCAGTCATTTTGGCCTTCATAGGTCTTACAAGAACTACTGGAAATATCCAATCATTTGTTCTTCAATTAAGTATTCCTATTAATATGTTCTTCTGCTTTTTAATATTAAGATATAGA	174	845.5	0.0837274
PF3D7_0513700	PF3D7_0513700_e3s1	ATTCAACTTATCCTGTACACACATGTGTTATTAAACATATGTTATGGTTTTTATTTTGAACAGACTGAAGAATTACTTATAAAGAATGCTCATAGCGATATATGTAAAAGAGAACATTATATAAGCTTCAATAAAGAAATTATAAAGTTATGTTTATTCTCTCAACCTTCTGGTGTTCATTCTAAATATAATCTTATAGTAAATACATTAAAAGAAGAAAAATGGGAAGAAAAATATAAAATTTTAAAAGAGAATACATTTAAAATTCTTAAATATTTCTATACATTTGTAAATAAAAATGAACTAGTCATAATATTTTGTTTTAATAAACTTATAAATAAAGCACCTTATGAATGCCATAGATCTATTAACAAGGTAGATGGTAAAGGAAATGAAGAA…	588	786.5	0.0835112
PF3D7_1149100	PF3D7_1149100-e2o2	AATGTTTTTACTTCTAAATGGAATGAACCATCCGTTTTACAATTAGTTAATACACATTCTAGAGTTTTATATGATACAGAACCATTAGATGAAAATTTAAATTATGAATCAAAAAAGGTTGAATATAAGTGTTCTTGCAATTGCTCTGATTGTCCTTGTCCTATCCAAAATGAAGATTCTGAAAAAGAAAAAACTGAAACGCAAGAAGAAAGTTTAAATAAAGAAGTTGTTGAAGGATGTTCAACTGGTATGTGCCCATTAAGAAACAATGATACTAAAAAAGAAAACTGTGAAAGTTGCAAGAAAGAAAAAACTGAAACGCAAGAAGAAAGTTTAAATAAAGAAGTTGTTGAAGGTTGTTCAACTGGCATGTGTCCATTAAAAAACAATGATACTAAA…	1155	784.5	0.0821678
PF3D7_1474000	PF3D7_1474000-S1	ATGAGCGACATTCTCGAACATATCCGCCTGTTCTTCTTCTGCCATCTTTATAACCTGTGCTATTTCTGCAAAATCTACGTCAACTCGGCGCCCTTGCATGACATGAATCGCGAAAAGAACGTGCTGCTGGACAAGAAGAAGGACCGTAGCTCACTCCAAAACGTGCTGACCGACGATCTGTTTAAGATGAAGTATTCACCGTTAGACGTCCTTAAGTGCCTGAAGAACATCGAGATCGAGCACATCATGAAGTGTTTTAAACTGGTCGACATCAGCTTCATCGAGAGCCACATCATGTTTAACATGTGCATCGCCGAGATGCTCATTAGCTACTACGAAAACCGTGAGTCTATGTACAACTACGTAATGGAAGAAAAGGGCGTTCTCCGTATCTTCGTT…	1686	834	0.0821462
PF3D7_1456300	PF3D7_1456300	ATGGATGATGTAATAAAAAATAAGATAATAAAGAATGATAAAAAAATTGTTGTGATTTATGATGAAATATATGATACTTATAGAAAAGAACAGAAAGGGAAAAATGACTACGAGAAAATTTTGAGATTTTTTAATCCAGCTGTATTAATAATTAAAGTATTAAGTGAAATATATAATATAAAAGATGAAGTAGAATATATTCCATATTCATCATATGAATTGGTAACTACACAAATATATATAAATAAGGAAAAGAAAAGTTTATATGAATCTTTATATATATTATATTCTATAAATAAATGTGAATTACCAAATAATGACATGAAAAATATAAAAAAGGTTTTATCAAAAAATAGCCAAATATTAATAAACCAATTAGATAATAATGATATGGTACAT…	1245	834	0.0821462
PF3D7_0404400	PF3D7_0404400	ATGGCTTATAATATTTGGGAGGAATATATAATGGCCAATTTTCATAATGTGTATCCAGTTGTGACAAATTTATTTTTATTTATTGCCCTTTCGTACTCTTTTTGTATTTTTGTTTTTTTTTCATTTTTTTTCGTTAAGATGAGAAAGGTGATATATTTTTTTTTAATCATTTGTTTACACTCGAATGTGGGATGGCATCCTTTTTTTGTTTTTTTTTGTGGTGTGTCGGGATTATATGTAAAAGAATTACAAGTGGGAAATTATTACATATGTAATTTGAAGGATTATGCTAATGAAACATGCACAGTTAATTATGACTATAATAAGATGATAAAATTATTATGTCCAATTAATAAAAGTTATGAAGAGTATGATGATCGTTATTGTTTTAAATTTATA…	1137	837	0.0820806
PF3D7_1416000	PF3D7_1416000-e2o4	TCCATTTTTCATTTAAACTGGTTTAGAAAGTCACCTGATTTAATACCCATAAGTATGCAGCTATATTCTATGTTTGACGAAAAAAATAATTTCCTAGGTTTTGTCCTTCTCTGTTCTGCTATCTTTACTATTATAGAATGGATTTATTTA	150	842.5	0.0816771
PF3D7_1470500	PF3D7_1470500-S2_C	ATGCTCGAGTTAAACAACACGTACATGATCTGCTACCTTATTGCGAGCATCGCGCACGACGTCGGTCACCCGGGTAAGACCAACTCCTACCTGAGCGAGACCAACCACATTCTGTCGATTCGTTACAACGACATGTCGATTCTTGAGAACTACCACTGCTCAATTACGTTCTCAATTCTGCAGCTCATCGGCTTTGACTTCCTTATCAACAACGAGGACACAAAGCTGGTCGAGAAGAACAACTACACGAATATGCGCAAATTCATCATTGAATTGATCATCAGCACCGACATGAAGCTCCACTTCGAGTACGTGGATATCTTCAAGAAGCGCAAGAAGTCGCAGAACTTCGACATCAGCGACACCGACGCGATCAACCTGGGTACTATTAACATCAAA…	1079	837	0.0813263
PF3D7_0727800	PF3D7_0727800_e1o1-s3	TGTCATTCTATATGTACATTAAATAACAAATTGTTAGGTGATCCTTTAGAAAAAAACTCTTTTCTAAAATTAAAATGTGTCATGAAAAGTTTGAACCATACCTATGTATATACAAATAATATTAACAATAATAACAATAATAACAATAATAACAATATTAACAATGATAATGTTGTGGATAAAAAATATCATAAAAACAATGAGAAGAAAATAAAAAATCAATCCTTAGAAAATTTCCAAATTGTCAAAAGATTCTTTTTTTCTTCAGAGTTACAAAGAATGACTTGCATTATATTGCATGAGGGCTCTCAACACGATTGGTATGGGGACGAATACGAAACGGATACTTGTGATTCGGACGAACAGAATGAAGAACAGTATAAAAATACAAAACAGCAT…	1500	839	0.0807897
PF3D7_1406800	PF3D7_1406800-e2o3	TGGGCAAGAGGATATAGAGCTGGATCCAAAATTTTAAGATTAGCTTCCTTTTTGGACACAATAAGTGCAACATTACAATTTATTTTTTATTTATACATATCTAAATTTTATACAAGAAAATGGTATGTTCATTTTAATGAAGGTGGAAGTGAATGGGTATTTTTTATATTTGTACGTTTGGTTCATGCTTTTTCCTGTTTATTATACGGATTAGCTGCATACTTATTAGAAGTATATCATGATGAGGGAGCAGGAGATTTACATGCATATATAAATGGTGTGATGTTTGTTTTTGCGGGATTAACA	306	786.5	0.0807291
PF3D7_1452800	PF3D7_1452800-e2o4	TTAGATAGAAACGTTTTTGAAACTTTAAAAAACGTTTTTCTCGAAGAACAAGAAAATAATAAAAGAAAATATGAAGAGTTATCAGATCATCTAGATAAAATGAAAACATATTTTGATGAAAAAATTAATTCCCTTAAGAATAATACACATGAAAATTTTGAAGAGTTAAAATATTATTTAGACAACTTAAATAAAAAAAATAAAGATACTATTTCAGAAAGTAATACATTCCAAGAAAATATAGATGCTATACAAAATGATATATCTAAATTAAAAAAGGATAAGGAGGAAAATACAAATCTTATAAAATCAAGCATTAGAACATATTTTGACAAAATGAAAAAT	345	784.5	0.0803367
PF3D7_0729900	PF3D7_0729900_e2s3	CTCAATGATATGAATATGAGTGAAGAATCTATGGATAAATCAGATGAAATGTTGAATAAAAATAAAAATTTGAATATATTGAATAATGTTGAATTTGGAAAAGATGATGATATACCCGAAGAAAAGAGATATATAAATAATGATAATACAAATATGGATACTACTACTAAAAATAATAATAACATGAACAATAATAATAATATGAACAATAATAATAATTATATGTTGCAAAATAAAAATGATATCTCTTCGTGCTTAAAAGAATCCTTGATTATAAAAGCAATAAGACCAGATAAACTGGAAAATTGTTTTAATAAAATAATAAATCACATATTAGGTAGAGATTTTTTGTGGATCCCTGAATTGTCAATGAATGATTTTGAAAAATATGTTAAGGAA…	2400	840	0.0802407
PF3D7_1474000	PF3D7_1474000-S4	GAACAAAACGTGCAGCAGAATGTGCAGCAGAATGTCCAGCAGAATGTGGAGCATAACGTCGTCCATAACGTCGTCCATAACGTGGTCCATAACGTGGAGCAGAGTTCCGAGACTTACAACACTGAGTACAACATTCAGCCATCGCAGCAGTACAATATTGAGCAGCACGAGCAGTACACGCAAGAGGAGTACCCGACGCACATTACCCAGCAAGACCAGAGCCATTCAACGCACCCGTACAGTCAGTACAACGTTGAGGATAACCAGGAGACCAGCATCGACCGCAACCCCCAGTACGGCGCCGACTCACACACTCAGCGCAAAATCATGGGCTCCACCGAGTACGGAGACTACGACAACGAGTACAAAGACAACTTAAGCGACCTGACGGAGCAGATG…	1275	844	0.0796285
PF3D7_1337500	PF3D7_1337500_e1s3	ATGGTTAATTATAAAAATGATATGGATAATTACAACCATCATATGGTTAATTATAACAATGAAAAGAATGAAAGTAACCATCATGTGGTTAATTATAAAAATGATATGGATAATTACAACCATCATATGGTTAATTATAACAATGAAAAGAATGAAAGTAACCATCATGTGGTTAATTATAAAAATGATAATAAAGAATATAACCATGATATGATTAATTACAACAATGATATGAATAATTACCAACATGATATGAATAATTATAACAATGATAATAATGATTACAACCATTATATGAATAATTACCAACATGATGTGAATAATTACCAACATGGTGTGTATAATTACCAACACGATGTGAATAATTACCAACATGGTGTGTATAATTACCAACATGAT…	2484	830.5	0.0789337
PF3D7_1132800	PF3D7_1132800	ATGCATATGTTATTTTATAAATCATATGTTAGGGAATTCATTGGAGAATTTTTAGGAACCTTCGTTTTGATGTTTCTTGGTGAAGGAGCAACAGCAAATTTCCATACAACTGGATTATCTGGAGATTGGTATAAATTATGTTTAGGTTGGGGTTTAGCAGTATTTTTTGGGATATTAGTATCAGCAAAATTGAGTGGTGCACATTTAAATTTAGCCGTTTCAATAGGTTTATCATCTATTAATAAATTTGATTTAAAAAAAATACCTGTATATTTCTTTGCACAATTATTAGGAGCATTTGTAGGAACATCTACTGTATATGGATTATATCATGGCTTTATATCTAATAGTAAAATTCCTCAATTTGCTTGGGAAACTAGTAGAAATCCATCCATAAGT…	774	837.5	0.0789331
PF3D7_0804500	PF3D7_0804500_e2s2	AATAATAATAATGATGATGATCATAATAATGATAATTATAATGATAATTATAATGATAATATTTTTCACTGCTATGAAAAAAAAAAAAAAAATAATAGACACACATCCATATTTCGTCAAAATAATAAAAAGTTACCACATGTTATTCCATTATCTCTACTTTTCTACAATTTTAATGAAAAATATTTTATGGAAAAAAATAAAGTCGATCAATCTAATAGTACTATTTTATATATACATAAAAAAAACAAAATAAAAAAAATATGTATCCTGGATCATTTGAAGAAGCTAAATAAAAAATGTAAATTTATTAATTATATATCGTACAATGATATAGAATATGATAATAAGTACATAAGTAAGAAAAAAAAAAAAAAAATTATATTAAATGAAGGATAT…	2124	834	0.0787543
PF3D7_1125200	PF3D7_1125200-e3o4	TTAAATGTCCGATTTATTTATATGGGCAAAATATTAGATGACAAAAAAAAACTAGAAGACTATTTAAATTTTTATAATCAGGATATTTTAATAAATAATAAAATTACAAATATATTATATGAAAATAAAAAAGGATATTCTACAAAAAAAATTCTAAATGATATTAATAATACACATGTAAATACAAATTCCAAAGAAAATGCATCAATAACTATACATGTAAAAATCACAGAAAGTTTTTCATCTTCAAGAAAT	255	782.5	0.0784573
PF3D7_0930500	PF3D7_0930500_e1o2-s1	ATGGAAGATTTTGCATATATTGATAAAAATGTTTACATAAATATTTTACTTGTATTTATTAAAAAAATAAAAGATTACATAGTAGGAATAGGTATATTGAAAATCCTTTTTTGTGTTTGTATTATATTGTTGAGCATTTTTATAGCGAAAAGGAAAAATAAAAAGAAGAAGAAAATACATGTATATCTACAATTAAATAGAAAAAAGAATAATAGTACAAAAGTTTCGAATAGTTCAAAAAAGTCTACTATAAGTAATGAAGATGAAATATCACAAAAAAATTTATCAAAAATAAGTGACAATGGAAAATTAGAAGAAATATCTAATGGGTATTATCATTTAACATATACATCTCATATTTTTAATTTAAAAACAATAAATAGAATAGAATTATGTAAT…	1500	783	0.0783047
PF3D7_0912200	PF3D7_0912200	ATGAGAGTATGTTATTTAAGAGGGTGCTTATTATGCATAATAACAATTGTTTTGTGGTCGAGGATTTACAAAGTTTATGGTATGGATTCCTTATTTTCTTTTAACAATATGTTACCTATGTATAACATTTTAAAAGGGAAGCATCATGTAAGTATGAGTGATTTGAAGATCAGCGAGAGTTATTTATTTAAAGAGCCAAAGAATATAAATATCGATTTGGCTTTGTTGGCTTTAAAAGGTATGGATAGAGAAAATAGGAATATGTTTGATTATAAAAGTAAGAATAATGATGATAATAATAAAAATGTAGAAAGGATTTTATGGAATAAAATGAATAAGGATGATTTTATTTATTCAAAATTGGAGGTTGATGATAAATTAATAAAAGGATTGCCCGAT…	1359	783.5	0.078086
PF3D7_1121800	PF3D7_1121800_s2	GGGGAAAATGATTGGAATGAATATGAATATTTTAAATTGAAAAGTAATGAATTAAAAGTTTTAGGAATAATAAATAAATATTCACCAAAAGGAGGTTTTTCTATTTCTGTTAATTGTGGAGGATATGATGATTTTCGTGAAATCCCAGGAATTTCTAATCTATTAAGACATGCTATTTTTTACAAATCTGAAAAAAGAATTACAACATTATTAAGTGAATTAGGAAAATATTCATCAGAAAATAATAGTCGCATAGGTGAATCTTTTACAACCTATTATGCTATTGGTAAATCTGAAAATATATATAATATACTAACATTATTTTCACAAAACTTATTTTATCCATTGTTTGATGAAGACTTTATAGAAAATGAAGTGAGAGAAATAAATAATAAATAT…	2064	848.5	0.0778869
PF3D7_0522400	PF3D7_0522400_e3s3	TTAACCGATACAGTTAGTAATCTTTTTAGTGTTTCGAAATGCAATATGAAAAAGAAGAAAAGTAAAAAAAATTCGTTTTTTTTTGATAATAATATATGTATATTAAGTAAGAGAAAATTTGATTTATATATAGATGATTATCATATGAATTATAAAAATATGAAACCACAAATTCATTTAGATATTCATATAAATAAATGGACAAATGAAAAAATTATCAAAATATCTTTATCGAACTTTTACTTTTTTTATAGTTCTACATTGTTTATATTATTTAGTAATGTCGTGATAAATTATATTTTGACATATATTCAAGAGAAACAAAAGTTAAATATTCTATTATTTCAATATGACAATTTTAGAAGTGCAATAAGTTCTAAATATACCAATCCTCATTTG…	2802	847.5	0.0765429
PF3D7_0936400	PF3D7_0936400-e2o2	TTAATTTTTATTTTATATAATAGAAACACATGCTTGCGAAGAATTGCAAAATGTGGTAGAAACTTGTCCGAGTTAAATTTAGACCTGAGAACAGATTATGACGAACGTGAGATTAATATAAATAAAAACATTCCATCTTACCCCGTTAAATTTAGTAAGTTGGAATATAAATTAAGAAACGAATGGGATGAATTAGAGATAGATGAACATGATGATTATATGGATGTCACTGTTGAATGTTTTGAAAAATTATTAGAAAATGACAAAAATTTAGAAAATTACCAAGAGAATTATGAAATAAGAGCCTTAGTTGCTTATATGTTACATGAGCTTCGTAGAGGATATATAAATGAGCAAAAAATGAAATTTAAGAATTTTTTACATAAATTAAAAGAAAAA…	567	782	0.0761316
PF3D7_1315600	PF3D7_1315600_C	ATGCTCGAGATGAAAATGAAGAAGAAGAACGTGTACTTGTACATTCCGAACATTATTGGATACATTCGCGTCATCTTAGCGCTGCTTGGTTTCATCATTAGCCGCAAGAACTTGTTCCTGTTTGTCTGCTTCTACTCAGTGAGCCAGGTGCTTGATGCGCTGGACGGTTGGACGGCGCGCAAGTTTAACCAGACATCAGTCTTCGGCCAGATTCTGGACCAGATCACCGATCGTCTGAGCACCTCGCTGCTGTACCTGCTCAACAGTAGCGTTTATGAGGAGTACATCACGTTGATCGGCCTGATCATGATCGCCGACATTGCGGGCCATTACTTTCATTCTACGTCCTGTGCGATCGCCGGAAACAAGACCCACAAGAAGATCGAGAAAGGCAACAAA…	710	781	0.0747578
PF3D7_1135400	PF3D7_1135400_e1s1	ATGAAATTTTTTTCTGTTTTATTCCTAATACAATTTATAATATATATATATTTTTTTAAAACTGTAGTTAAATCACTAAATCTGAAGATTGATTTAGATGATAAAAGGTATACAGTATTATATGATGAAAAGAAAGTAAAATTTGCAGATCTTGATCTTTTAAAAGTTATGTTCCATCCGAATCATGTGAGACATTGTAGTAATTCTATTATTAATTATATGATGAAATTATCATCAGGAACTTCACCATATATTCTGTTTGTAGTAAAAAATATTGATATCACATTTGAGAAACCATTAGAATATAATGATGATTATAAAATTTTTGGTGCTATAACTAATTATGGTAATACATCAATAAAATTAACCGTATTTGGTATAGGATCAGAAAAAAAAAAC…	735	837.5	0.0745372
PF3D7_0209000	PF3D7_0209000_s4	AAAGTACCAGATACCTTTAATTCTATTATTAACTTCTCATGTAATTGTTATAATCCAGAAAAACATGTATATGGTACTATGCAAGTTGAGTCTGATAATCGAAATTTTGATAATATTAAAAAAAATGAAAATGTTATAAAAAATTTCCTTTTACCTAATATAGAAAAATATGCACTACTATTAGATGATGAAGAAAGACAAAAAAAAATAAAACAACAACAAGAAGAAGAACAACAAGAACAAATATTAAAAGATCAAGATGATAGATTAAGCAGACATGATGATTATAATAAAAATCATACATATATACTATATGATTCAAATGAACATATATGTGATTATGAAAAAAATGAATCACTCATATCAACATTACCTAATGATACAAAAAAAATACAAAAA…	2385	837.5	0.0742709
PF3D7_0904200	PF3D7_0904200-e1o2	ATGAACTATCTAAAATTGTTTCTTTTTTTATTTTTGGTGAATATACTCAACATTTATGGGACTCCCTTATTCTATAACAAAAATCTTGAGAAATGGAATAAGGAACTTTTGAAAATTTCCAAAAAAGAATACAACAGTCTGAATGAATTAAATGAACTTACAGACAGAAAAAATTGTGGAAAATCACTAAAACATTTGGCAGGACTCATTTTAGATAAGTCAGATAAAGAAGCTAAATTAATCATAGAAGGATCTATTATTTTTAATAAATTAATTTTAAAACTTGGGAATATAAAAGAAAAAGAAATAAAAGTTAATGATATTATATTACCTATAGAAACATTGTCAAATAAATGTATTAACATACGAGTAGCCAAATCAAACGATTCTACAATTTTG…	804	829.5	0.0740267
PF3D7_1324300	PF3D7_1324300_e1s4	AAGTTCAAAGAAATAAATTATTTTATAACATATTATGAAGATATACATGTATTATTGTTTTATAAGTTATCTAGAGAAATGTTATGTAACCAATATATATGTAGAATAAAAAAAGAAAAAAGAAATACATCTTCTCATACAATTTTTTTTTTAAATGTAGACATGTACAAATGTTCTTTCAATATATATAAACCTATATGTTGGTATAAACAAAAAGAAATGTATCATAAAAAAAAAATTGTAAAAATAATTTCTAATGGATCTTTTTCTTATACATCTTGTATTAACAAAAAAAAGGATATAGATAATACTATCTTTAAAAAAATGAATATTTCTTTACACACGGATATTTTTTTTTCAAATAATAATATAAATGAAGAATTTGTAAGAAACATATAT…	2637	847	0.0737435
PF3D7_1362300	PF3D7_1362300	ATGGAGGATAAAATACGAAAGTATGATGTATTTTGTATAATGGGTTTAGCTATATTATGTGGTATATTTTCTGAATTTTTAAGTTGGTTATTTGTATATAGAAATGAGAAATTTAAAAAATTAAATGAAGAAGTTAAAGTTTTATATGAAGAAGTACAGAAAGAGAAAGACGATGGATTATTAAGTAAATTAGATAAAAAAAAGGATAAGAAGAAAAAGGCTTCAGCAGAAGAATTATATATAGAGAAAACTAAAGAAATGACAACATTAAAAACAAAATCAAATTTTATTACAGGTTTGATTTTTATGTGTGTTATGCCAGTATTATTTAGTTTATTTGAAGGATTAACCATTGCTGTATTACCATTTAAACCAATCTTTCCATTTACCTTATTAACA…	567	834.5	0.0736313
PF3D7_1470500	PF3D7_1470500-S1_C	ATGCTCGAGATGAACGAATACAACAACGACAACATGGAGCAAGAGAAAGAGAAGAAGAAGGAAGAGCAAAAGTACAAGAACATCATCAAGAAGGAGTACTTCATTTTCCCGCGCCTTTACGATAAGAACAAGGAGATTGAGTATAACAAGCTGCGCATTCACAACATCAAGGAGTACATCTGCATCCATTTGACGATTAGTCTCTTCATCATCCTGATCGAGTGCTTCGTTTTCAGCTTTAACCTCAACATCAAGGACACCACCTACGTTGAGATTTGCGTTGTGATCTTCAGTATCCTGAACTGCTTAATGCACATCGTAGTTCTGATCAAGATGTACTTCTTCACGTCGGAGTCTGTTTACACCAAGGGTGTGTTTATCGGCTACATCGTACTGAAC…	1583	844.5	0.0723984
PF3D7_0730900	PF3D7_0730900_e1s1	ATGTTATATAGTAGATTAGATATAAAAAAACATAATGAGAATACTAAAAATATGTCCAAATGTTATACGATTGTGTCTGATGAATTGATATCTAGGGAATATAATATAAAGAAAAATAGAATGTGGTATTACATTTTTGTTAAAATATTATTTCTTAGTTTTTTCATATGCATATTGAACGGATCGAGCTAT	192	779	0.072145
PF3D7_1326500	PF3D7_1326500_e1o1-s4	CTTCAAAATTTTAGATTTAATAGCTCAAATGTGTATGGGAATATAAAAAATGCTTTAATAAAAAATTACAATCTTCAAAATAATGATGTGGTAAAAAATGATAATGATTTAACAACTTGTGAAAAAAAACAACATTTACCCTTCTCAACAACATGTGTAGATATTTATCATAATAATAATAATAAAAATGAGGAGCATAATAGAAATATAAACATAGATATTGATTGTAACCATACTTTTTCATATACACAAAATAATATTATAAATTCTTTTAAAAATGACTGGAAAAATAATATAAATAAAAAAAAAAATTTTAAGAAATTTAAAGAATATTATAATATATATGATAATAAAAATAATAATTATGATTTTCTTCTGAATTCATATGAACGTATCTTA…	1500	779	0.0720927
PF3D7_0406200	PF3D7_0406200	ATGAATATTCGAAAGTTCATACCATCTTTAGCTTTAATGCTTATATTCTTCGCTTTTGCAAACCTGGTATTATCAGATGCAAATGACAAAGCAAAAAAGCCCGCTGGAAAAGGATCCCCTTCAACTTTGCAAACCCCAGGAAGTTCTTCAGGTGCCTCTCTTCATGCTGTTGGACCTAATCAAGGTGGACTATCTCAAGGTCTTTCTGGAAAAGATTCTGCTGACAAAATGCCTTTAGAAACTCAGCTAGCTATAGAAGAAATCAAGAGCTTATCCAATATGTTAGATAAAAAAACGACAGTTAACAGAAACTTAATCATAAGTACTGCTGTCACAAATATGATCATGTTGATCATATTATCTGGTATAGTTGGATTTAAAGTTAAAAAAACGAAGAAC…	471	779	0.0720522
PF3D7_1408100	PF3D7_1408100	ATGAATTTAACCATTAAAGAAGAAGATTTTACCAACACCTTCATGAAAAATGAAGAATCCTTTAACACGTTTCGAGTAACTAAAGTAAAAAGATGGAATGCTAAAAGATTATTTAAAATATTATTTGTGACAGTTTTCATAGTTTTGGCAGGAGGTTTTTCTTATTATATTTTTGAAAATTTCGTTTTTCAAAAGAACCGTAAAATTAATCACATAATTAAGACTTCAAAATATTCGACAGTAGGATTTAATATTGAAAATTCTTATGATAGACTTATGAAAACAATTAAAGAGCATAAATTAAAAAATTATATAAAAGAATCAGTAAAACTTTTTAATAAAGGTTTAACCAAAAAAAGTTATTTAGGTAGTGAGTTTGATAATGTGGAATTAAAAGAT…	1353	779.5	0.0719435
PF3D7_1107900	PF3D7_1107900_e1o1-s4	CCACCAAAAGAAGCAAGAAATCCACTCTTTCTGGAAACAGCAAAACATAAAAGAGAATTTGACATCTCATCTATCCAATCGAATAATGAACAGCATGAAGCTCCAAATCATATCATATATAATGAACCTGTTAATTTCGAAGATCAACCTTTAAAAAAAAATAAACTTAGATCTGTATATAATTCTTACAAATATGTAGAAAGTACAAATCATAATAATATGGATACATCTATTGAAAATGGGAATGGATATATGTATGAATCGTATCTGCAAAAAAATGAGGATAATAATGATTATTTTGTATATAATAAAAAAAAAAAAAAAAATAATAAAAAAAAAAAAACCCATGACTTTAATACAAAGAAAAATATAAATATAAATAATAATAATAATAATAAT…	1074	779	0.0719429
PF3D7_1340700	PF3D7_1340700_C	ATGCTCGAGATGAGCAACGAGGAGTATGACCACTTGTATAAGATCATTCTGGTTGGAGATGCCACCGTGGGTAAAACGCACCTGCTGAGTCGTTACATTCGTGGTAGCCTGCCGTCGGTCGCGAAGGCCACAATTGGCGTGGAGTTCGCCACCCGCACAATCCCGCTCGCTGTGGGCGGGACTGTAAAGGCCCAAATTTGGGACACAGCTGGACAGGAGCGCTACCGTAGCATTACGTCCGCCCACTACCGCCGTTCTGCGGGTGCGATTCTGGTTTACGACATCACGAAGAAGAAGACGTTCCTGAGCATTTCCAAGTGGCTTGAGGAGATTCGCCAGAACGCGGACAAAGACATCGTAATCATGCTGGTAGGTAACAAAGTGGACCTGACAGAGGAA…	770	779	0.0717954
PF3D7_0618500	PF3D7_0618500	ATGACTAAAATTGCCTTAATAGGTAGTGGTCAAATCGGAGCAATTGTTGGAGAATTGTGTTTGCTGGAAAATCTTGGAGACCTTATTTTATATGATGTAGTCCCAGGTATACCACAAGGAAAGGCTTTAGATTTAAAACATTTTAGTACCATATTAGGAGTAAATAGAAACATTCTTGGTACTAATCAGATCGAAGATATTAAGGATGCAGATATAATAGTTATTACAGCAGGTGTACAAAGAAAAGAAGGAATGACTAGAGAAGATTTGATAGGGGTCAATGGGAAAATAATGAAAAGTGTAGCTGAATCAGTTAAATTACATTGTTCCAAAGCTTTTGTTATTTGTGTTAGTAACCCACTTGATATTATGGTAAATGTTTTTCATAAGTTTAGTAAT…	939	779	0.0711243
PF3D7_1122900	PF3D7_1122900_e2s1	AATAACGTAAAACATACTAATAATACCAATAATAATGATACACATATAACAGATACACTAACACATATAAATGAAAATAATGATACTAGAAATAATTTTTTAAAAGTAAAAGATAACCATAAGATTGTAGATTTTATAAATGAAAATAAATTGAAATTTCTAGATTATATCGATCCTAATATCATGAAGAAATTAAGAAATTATATCAACCTCTTAAATACAGAAGAATTAAATTTAAAAAACAAAAAAGATAACAAAAAAATAGATGATTCAAATAAAAAAGATTTATTAGGAATTAAAAAAAAAAGAAGTGAAGATAAATTTCATTTAGATAATAATTTAGAGAAAGATGAGAAAAAAATTGAAGTAATTAAAAATTTATTAATTTTTTATCATAAA…	2619	832.5	0.0710669
PF3D7_0522400	PF3D7_0522400_e3s5	TCAATAAAAATGTCATCAACTATTATATGTAATAATATAAATAAAGAATTGAATTTCCATGATGTTTTAAGTATATTTGTTCATACATTTAAAATGAAGTTTTCTAAATTGAAAACAAATTATATGAAGAACAGGGCAATACAAAGCAAAAATTATATGCATAAATTGTTAGAAGAATTGTATAATGATAAGGATGATTATTGTCATAAGATACATAAAAGAGAGAGAACAAAAAGTAAAACAAAAAAAAATTCAAGAAGAAATATAAACAACAATGCAAACAAACATACATACACTACCATAAATAATAATAGGACTAGTGATAGTATAAGTAATTTTAATTATAGCTATGATAAAGAAAATGATAACAATCATATTAGCCATTTGAACAATAATATT…	2802	832	0.0709438
PF3D7_1346400	PF3D7_1346400_e1s6	TCGTCTGTTATATATCCTAGTGAAAATTTTGTTGGAACAAATTATATGGTAATTAATACAGGAAATCACGAAAAATCTGATGTATACGCGATAACGTGTATACCTGATAGAGGTACGAAAAATATTATCATAGAAAAATTAGAAAATAAGAAGAAAGGTTTTATAGCATATAATAATTCAAGTATTGCAAAATATTTAAAGATTAGAACATTCCATGATGATACGAGACATATGAAAATTCACGATGAAGAGAATTATATGGAAAAGAATATGTTTTTAAGTAATTTTTTAAAACCAACAGATATGGAACATTATTTTAATATAGAGCCAAATAAATATAGTTATTTGGGATGGGTAAATCCATTTATATATGTTACTAGAAATGTACAGATAGAAATA…	3027	842.5	0.0704031
PF3D7_0109400	PF3D7_0109400_e2s1	GATGAGAATAAGGGTGAAAACGAAATAAAGAGGGCAAAAGATATTTTAGAAGAAACTGTAAAAGTAGTACCACATATAAATAGTTCTTTACAAAAAAGCTTGAAAAAGTTATATGAAACAGTTTATGAAAAATTTCCAGACATCCTGGAAATCAATGACAAAAAAGTTGGCATTTCAAAAAAATGTACAGAAGAAGAATTAAAAGAATTATTTAAAACAAACTATGAAGAATTTCGTAATGAAATTAATATTATTAATCAAACATTAGAAAATGTGTTTCTACATATTAAAGATGCAACCTTACCATCATCCAAAAAATCTGTTATAAGTGAACCAGTCTTATATCAAATGGAAGAATGCATTGATATT	369	827	0.0698251
PF3D7_1304100	PF3D7_1304100_e2s1	TTAAAATGTTTCTCTTTTCCAAGAAAAGGAACTAACGATAAGACGAAGGAAAATGAAACATTTGAAAAAGGAGAAGTAAAAGAAGAAGAAGAAGAAAAAGATAAAAACGTCAAAAGGAAAATTATTAATGAAAGTAGTAAAAATAAAAGAGCTAAAGTTAAGAATGAAAATGATGTTATAAAAAAAGGGTCGTTATTTAATTGTGTTGTAAGAGAAGATGAAAAAGTGAATGATTTGAGCTCACCTAAATTTAATCCTGTACATTTTAATATAAATGATTTATATTTATCTGAAAAAGATAAAGAAAAACATAAATTTAAAGACTCCTTATTATTTACCTTTTTAACAAATGCATTTAATCAAATAGAAGAATTAAAAGGTAGTGGTACAGGAAGTAAA…	2541	841.5	0.0697321
PF3D7_0711700	PF3D7_0711700_e2s1	AAAAAAACCAAAGCATCTGTTGGAAATTTATTCCAAATACTGCAAATACCCAAAAGTGATTATGATATACCTACATTGAAATCCAAAAATAGGTACATACCATATAGAAGTGGTACATATAAAGGCAAAACATATATATATATGGAAGGAGAAACTAGTGGAGATGACGATAAATATGCATTTATGTCTGATACTACTGATATAACCTCTTCCGAAAGTGAATATGAAGAATTAGATATTAATGATATATATGTTCCTGGTAGTCCTAAATATAAAACGTTGATTGAAGTGGTACTAGAACCTAGTGGTAACAACACAACAGCTAGTGGTAAAAACACACCTAGTGATACACAAAATGATATACAAAATGATGGTATACCTAGTAGTAAAATTACAGAT…	1392	827	0.0692317
PF3D7_1220000	PF3D7_1220000_e1s1	ATGAGTGAAGAAAAATATAATTATTTGGATATGCATTTAAGTCGAAAGGGGTCCATTTATGATTCTTTAATACATTTGAAACCAGATAATGAAAATAAATTTGGTTTAGATGAAAATAGCGATATCTGCAGAACCTTATCAAATTATGCAGATTATTCAACAAAAAAAGTAAAATACTTTGTAAATAAACGTTTTTCAGAAATAGAAAATATAGAGAAAAATATAGAAGACATTGATTATTCAGCATTTAAATATTTTAGGACTTTGCCACCAAAATATAGTGACGAAAATGATATAAGAAATAATATTATTTTCAACAACAATAATATTTATATATATGCCGAAAATAAAAATGGAACATTAAATGAGCAAGCTTGTATATCTATATCTCCTGATAAT…	1305	830.5	0.0688283
PF3D7_0532400	PF3D7_0532400_e2s1	AATGTTTGTATGAGGGAGAGAAATTTTAATTACGAAGTACAATTCAGTAATAGGTACTCAAGGAAATTGTGTGAAAGGTTTATTTATTATAATCCTAATGTTCAAGGAGTTTATCCTGATATGTTTATTGCATCTAGTTCACAAACTTATTCTGATGGAAGTGAATATGATGTAATGAAATATGCTAATAAAGTAATTAAAGATTTAAAGGAGCACGACTTATGGAATGATCATAATAAAGTACCTTATACTAGTGTATATATGGGTGTTTCTGTTCAAGATATTGATTATATATTGGATAAAAAAATAGATAATCTGGATTTATATGATGAAAATATTATAGATTCTATGAAATATATATGGAATGAAGTAATGGACAAAGAGAAGAAACGATTTTTA…	1386	843.5	0.0687922
PF3D7_0719200	PF3D7_0719200_e9s1	AGACAACTAAAATTACTGATTGAAGAAAAAATCAGAGAAAAGCAAAGTATGAAAAAACCTTTAAAAGAAAAGCCAGCTATTGAAAATGAAAATTCAGGAGCCAACGAACAAGAAGTAAAAACATTACTTCTGGATGTTGTTGATACT	147	778.5	0.0685992
PF3D7_0821800	PF3D7_0821800	ATGAACGCCGCACCAGTAATAGTTGGTGGTATGAGAACACCAGCAAGACGAAGACAAAGTAACGCCTCTGCTAATGGTAACAATTCAAAACAAAGAAGAAATAGTAATGGAAACTCTAACAGCATAGTGAAATTTTATGGTGATGATTCTCCTGGATTTAAATTAACTCCACAAACTGTCCTCATCTCTACATTAATATTTATGGCAAGTGTAGTTATTTTACATATCATTAGTAAAATATACCCATACGATGTTCCAGATTACGCTTAAATGATGATGTAATGATAGTACGCTAAATAA	300	777.5	0.0682312
PF3D7_0820700	PF3D7_0820700_e2s1	AGAAACAATTTACACAAATCGTGGGACTCTTTATTTAGCATGTATCCACATGCAGAAATGGATAATTATAATAACCCAATAAAAATAAATCGAAAGACTGATAATTATAATAATAGTAATTGTTTTCAAGATGTGCTTAAGAATAATAATCTTCGAATTACATATGTGAATAATGAAATGCTTGAAAAAGGGAAAACAGAAAATATTTATGATCTAGCTAGGATTGTTCAATTAATTAGATGGTATCAAAAGAAAGGACATTTATATGCTAATATAAATCCTTTGCCATTACCAAAAGAACCTCCCTATAGTAGTGTTTGTTATGAACCTTGTAAAAGGAAAATGTCTTACGTGGATTTTGGTTTTAATGAGGATGATTTAGATAAAGAGTTTTTTTTT…	2958	777.5	0.0681559
PF3D7_0515600	PF3D7_0515600_e8s1	GATGTTGCGAAGGCTTGTGCTGAGGGCGAAAGTGTTAATGTGCTGGACATTTTGGGAGGAGATAATACGAATGTTGGCAAATTGAATAGCAATAAATATTATGACAACTTCATTTATGGTTTGAATAAAAATGATGATTTTTACAACGCTGATAAATATGAAGAGTTAAGGAAGAATTATAATTATAATTATAATTATGAGGATATAGATATGGATATAGAAATGCAAATGAAAAATTCTTATTGTTATCCAAATGAGAATGTAGAAATATTAAGATACCATTTACATAAGCTTTTATACAATTTAGTGATACATGTGTGTAAAAAGCAGAATACATTATTTTTAAAATATAAGGCTAATGGTGTGATATTAAGTGAGTATGAGATGAATAAGCAATTA…	708	844	0.0673192
PF3D7_0115100	PF3D7_0115100_e2s1	TATTTACCAAATGATAGAAATAATAAAGTATCATCGATTAAATCATCTGAAAAATATCAAAGGAAACTTTATGACTTACAAAGGATTGTTAAAGGTAGAAAAAAGGATTCAAAATTAAAAAATAAATCGGAAGGTACAAATGAACAACAAAATAATAAAAATAATGGTAACATTGTAAAGAATGAAGAGTTATTAAGTAGATCAAATAAGAAGTGTTTAAAAGTAGATTTAAATAGGGAAAAGTTCTTAAAATATTTTAGTTCTGATAAAGAAAATATTAAAGATAAAGATATAAATTATAATGATCTTACAAATAATTTAAATAGGAAGGAATTATTAGCTGTGCTTGAAACTATAAATGAAAAAACACCAAGAAATGACCTTATAAATATATGGAGT…	786	825.5	0.0666614
PF3D7_1128300	PF3D7_1128300_e1s1	ATGGATATCGAGAATTCAAAAAAACACCTAAGCGAATTACAAGAAGAAAGAAGAAGACACAAAATTACACTTCCCGATATGTTTAAAAGGAAAGTTCTTATAAAGGAAGAAAATAATGATACTTATGAAAAGAATTTAGAGACAAAAAATGATATGTGTTATTCATTGAATAGATCAGATGATGAGAAGGAATATTTAAAAATGAAATTCCCTAATATTATTAATAATCCTATTATAAAACTTTATACTGATCCATATTACACAATACATATGTCAGATAAAAAAATGAATACAACAGATTCAATAAATACTTCAATGGATATGTCTAGTTATAATTATACTACAAATTCTTTTATGAAAGAAATGATTAATATGTATAAACCACATGAGAAATTAAAT…	1881	825	0.0657209
PF3D7_1032800	PF3D7_1032800_e1s2	ATAAATGTAAGCACACATAAAAATATTAAAACAAATACACACACCAATAAATATATAAACACGCCTTCTAATGAGGAGGCCTATTTTTTCATTTCAACAGAAGTTATTAAAATTTTCCGTCTTTTATTATATTGTAATATATATGTTGAATCTGTAGATTATTTTCATGATATAATAAATTATGTGAATAATTTGGTTGTATACAAAAAAAAAAAAAATGAGGAATGTCATGTTTATAAAATGTTCTTATCTCAAATTTATTTATATATAAGTTTGTATAATATTATGCATGCTGATAAAGAACTTTCCGGTCTTTTGTATCAAAATAAAATTATGACAACTTTAAAAAATTATGTAAATAATAATATTTGTTCTTCTCCAATTTTTGATGATAATATA…	2598	840.5	0.0650981
PF3D7_0505000	PF3D7_0505000_e1o2-s5	TCAATGTTGAAAGAACAGGTAAAGGAACAAAAAGAAAAGACAGGAGTTGAACGGAGTAACGAGGGTGTTGAGGAGGATGATTGTGGCGATGTGTACGTTACTCATGGTGATGAAGATAATGATGGTGATGAAGATGAAGATAATGATGGTGATGAAGATGAAGATAATGATGATAATGATGGTGATGAAGATGAAGATAATGATGATAATGATGGTGATGAAGATAATGGTGGTGATGAAGATAATGATGGTAATGATGATGATGGTAATGATGATGATGATGATAATGATGATAATAATGATGATAATAATAATGATAATAATGATGATAATAATGATGATAATAATAATGATAATAATGATGATAACAATAATGATAATAATAATGATGATGATTTT…	1500	827.5	0.0645531
PF3D7_1036300	PF3D7_1036300-S1	ATGATTTACATCCTGTCTATCGTGTTCTACATTTTCTTCCTGCACATCGACATCTACGTTAATATCTACTCCACGTGCTTCGTCGTTAACGAAGGTAATCCGAACCTGCGTAACAATATTATCAACGACGACGAGCTGAAAGGCAAGGCCTACAACAACACCATCGACGCGAACAATCAGAACATCGAGTACAACAAGAATCTCAAACATAACGTGAATAGCTCACACATCTCCAAGTTCAGCGACATCATGGACCAAGAGGACAAGGGTGACAACGAGAACAGCCACGATATTAAGTTCGAGGAGAAGAAGAACATCAACAAGTCATTGGATGCAGAGAGTAACTACGGCATCAACGAGATCTCAATCACAGGCAACGACAGCAACAGCGACAACTCT…	1311	823	0.0642751
PF3D7_1113100	PF3D7_1113100_0139	ATGAAGAGTTTGGAGAATAACGAAATGCATAACTTGTGTCCAATACATTATTATTTTAACGGGAGAGATTATAATAGTGATACAATAATAAATAATGTAAATATAAAATATTTCAATATGGATAATTGTTTAGGGAATGCTAATCTTCATATGGATTATTTAAATCCTGTATTAAACCACCCAACTAAAATAGAACATGGAAAAATAAAAATTTTAATATTAGATGCACCTACAAATGATTTATTACCCTTATATATAAAGGAAATGAAAAACTATAATGTAACAGATTTAGTACGTACATGTGAAAGGACATATAATGATGGAGAAATTCAGGACGCTGGCATTAATGTCCATGAACTTATTTTTCCTGATGGGGATGCCCCAACAGAAGATATAGTA…	654	824.5	0.0642585
PF3D7_0721100	PF3D7_0721100	ATGTCGAGACTTTTCTCTTTCTTGTTCTTTTGTTTAATTATTGTTTTTTTTTCCTCAAGTTTTGTATTCTCAAGAGGGAATCAAATATCGAAATGTGTTTTTTACGATAAGAGGAACAAAGATTTGAAGCAAGTTTTTTATGTCCCCACGAATGATGTAAATATGTATAAGGAGACGATAAGAAAATTATTATCAAGAGAGATAAGTTTATTAGAAGAACCTTTAAATGAAAATTCGGACAGTCATAATATGAGTAATAAGAAAAATGTATCTAATTTTGAAGAAATTAAAAAGAATGATGAGAATAATAATAGGAAAAGAAAAGAGATGGAAGAAAAATTAAAGTATATAGAGAAATATAGAAATTATGCAAAAGGTGTATTAAAAAATGTAGAATTT…	732	774.5	0.0635982
PF3D7_0413700	PF3D7_0413700	ATGGAAAAAATAAATGAAAATAATACAAGTGATATAGAAAGTGATAACGGTGAAGTAGAAGTACATGAAATTTATAATAAAAGTAATTTTATTAATGGAAGAGGAGCAAGATTAGTTCGTATATTATCAGAATTTGTTGGTGTTCAAGATGCCTTAAGAGATGAAGGTATTTTTTTTACGGTGGTTGTTTTTGGATCGTCTAGATCTTTAAGTCAAGAAAAATATGAATCGAAAAAAAGAAAATTAGAAAGAAAATTAGAAAAATTTAAAGAGCAAATAACAAATAATATTGCTATTGATGAAGAAGAATTAAAAGAATGTGAAAAATTAAAAAAAGAATTAGAAAGATTAGAAAAATTAAAATGGACAGGTGAATATTATAAAAAGATATATGAACTT…	1014	774.5	0.0633672
PF3D7_0102200	PF3D7_0102200_e1s1	ATGAGACCTTTTCATGCATATAGTTGGATTTTTTCTCAACAATATATGGATACAAAAAATGTTAAGGAAAAAAATCCCACCATATATTCATTTGATGATGAAGAAAAAAGAAATGAAAATAAGAGCTTTTTAAAGGTGTTGTGTTCTAAACGTGGTGTTCTTCCAATTATTGGAATACTATATATCATTTTAAAT	195	842	0.0631777
PF3D7_1353600	PF3D7_1353600-e2o3	TATATTGATCTCTTCTTTGTTTTTGTGAGCTTTTACAATACAGTTATGAAAATAACTTTTATACTGACAATAGCGTATACTATATATTTAATAAGATTGAAATTACCCATATCTCAAACATACAATAGAAAAGTAGACAATTTTAAAAGTGAAAAATATTTGATTCCTCCATGTTTA	177	774	0.0627828
PF3D7_0702400	PF3D7_0702400_e1s1	ATGAGTCAACCACAAAAACAACAAAACGAAGAAGGAGCCGCCACTGCCGCCAATACCCAAGAAAAGAAATTCAACCCAACAAGAAACCCAAGCCAATCTGGTCCCTATCGTCATCATGGACCCCAAGGAAGAACACCATATATGCAACTCCACAAAAATCAAAATAATAACATGGTAAATAAAATAAGTAATTATTTAGGAATTGAAAACAAGGAGTTGGTTGAATTTGGTTTAAACTTATTCACATATATTATAGCTATATTTCTTGCCTTACAAATATATGATTAC	288	844	0.0624988
PF3D7_1428800	PF3D7_1428800-e1o3	ATGTATCCCCCTTGTAAAAAGAAAAAACTTAATAATAACGAGGTAACAAATATTTTTTTAAAAAATGAAAATAACATGAGTGTTCATAATATTTCCATGAATGCTGTTTTATGTTCCTCATTAAACCTAGATAATATTTATAAATATTTTTCAAATTGTATATATAACCCTAGAGAATTTAAATGTATGAGAATTGATGTCCCCGTCACTTTAAGTACAGTACAAAAATATATAAAATATTTGAATAATAAAAAGGAAAAACAAAATGATGATATATGTAAAATGAAAAATGAACAAGTCAATCAAACAAAACATTCTAATAATAATATTAAAGAAGAGATTAAAACCAATGGAAGTAATAAATTAAGTGATAATAAACTATTAGATAGTAGTAACAAT…	825	775.5	0.0621569
PF3D7_1306600	PF3D7_1306600-e2o3	TTACATGATTCTATTTTGAATAAGATGCCTTGTTATGATAAATATGAAGAGATCAATATTTTGTCAGTTGAAGAAGTAGGGTTATTAAAAAAGTTTCATGATTTTAGTAAAAAGGAAAAATATGAATATTTTAAAGAAAACGATACTATAGTATCAATATTATTTAATTGTTTACAAACAGATTTCAATCTTCATTTAATGCAATATGTATTAACAATATTTTATGAAATAATAAGAAATGATGGAAGTTCTTATAGTTATATATTAGGTATATTACATGATAAAGACATGTATGGATATTTGATGAAGTTATGTACACATAGTGATACGTATATAGCTGATAAGAGTTCGTTTTTATTGTCAGGTAGTTTTTGTTATAATAATAATTATTTTACTGAA…	888	828	0.0618932
PF3D7_1367700	PF3D7_1367700_e1o1-s2	TTAGGAAATTGGAGTTTTGGTGATTATTTTAAAGAAGAAAGTATATCGTTTGCATGGGATTTATTAACGAATGTGTATAAAATAAACCCTGATAGATTATATGTTACATACTTTGGTGGAGATGAAAATTTATCTACTTGTCCAGCAGATCATGAAACCAAAAAAATATGGATGAAATATATTAGTGAAGATCGTATATTACCATTTGGTTTAAAAGAGAATTTTTGGGAAATGGCAGAGACAGGTCCTTGTGGGCCATGTTCAGAAATACATTATGATCGTATAGGTAATAGAGATGCATCTAGTTTAGTTAATAAAGATGATCCCAGTGTTCTTGAAATATGGAATATTGTATTTATGCAGTATAATAAAGATGAAAATAAAAATATGAATAAGTTA…	1500	773.5	0.061058
PF3D7_0728200	PF3D7_0728200-e2o2	AGAAAATATACATACGTAGGCTTGTGTGGGCTTCACAAGCCAGTATCCGTTTTTGTAACTCCAAACATTTTTGTATACAATGAAAAGTTTCACAATTTTGTTGAAGATACCTACAAGGTTAATGAAATGATGGATTATATAAATAGAAAAAGGGAAGAACAATACAAAAATGAGAAATCGGAAAAAATGTTGGATGTAAGTAAGGATCAATCCAAAGAAGATATAAAAATTGTAACGGATAATCAAACAGATGAATGTCTTGATAAGTACCAAAGTAGCGATAATTTAGATTATAATAATGAAGAATTTGTATGTGATACGAATAATATATATGAAAATAATAAATTTTGTGATAAGGAAGAGAAACATAATAAGATGAAGATATATCATTACGAATAT…	1593	772.5	0.0600119
PF3D7_0109000	PF3D7_0109000	ATGCTTTCTTCCATATCACCAAAAAGATATAGTTTTGATAAACAAGGAAATATAAAAGAAATTGATTTTTTAAGTTGCAAAAGTGTTATATTACCAGAACAACATTTGAATGCAAAGGACAATTTTATTTGTACAACAAGCATTCTTCCAAATTTTTATGAAACACCACCTGATAAAGCTTCTAAATTAAAAATGACACAGGAAAATAATATTGATAAGGCTAATATGGGTACGAATGTATACGTACAAAGAACATCATCATTAAGTAACATGAATGTTCTTCAGTATGCAGATGAAGTACACAACAATTTACAAGATTCAAATGTTCATGAAATAAATGAACCATTAATTTTTGCAGATGTTAATCAATATTGTGGTGATGCAAATACCCAAGGAATT…	672	772.5	0.0598342
PF3D7_1129100	PF3D7_1129100_e1s1	ATGATTAAAATAATATTAGCTAGCTTTTTATTTTTCTTTTATTTTTCGTCTTCCATTTATGGGAATGTGGTGGCCCCTAAGAGTGCTGAGGCTGTTCATACGTTGACAGCAAAACTTGATACGGAAAATAAGGCTCATCAAAAATATATAGATATTATAAATGGAGTTTTTTCGGAAAATATGGAGAATTTTGTTTTTTCAATAACAACCAGTAACGGATTTACATGTTCGATAAATAAGTTGGATGTTATTTTTGATAATAAAGTAACAGGAATGCAAAAAGTTTTTTCTGATGAGAATGTTCAATATATTAAAGAAGCTTCTCTTGAATTTAAAAACAATTTGTTGGAATATATGAAAGGTGTTATGCCATCTGAAAATGATTTTTCTAATGTTAGA…	1356	774	0.0587372
PF3D7_0208900	PF3D7_0208900_e1s2	ACATATTTATGTGACTTCTTAAACAAAAAACAAATATTACAACCTTTAAATAATAAAACCAAAAATTATATATGTACTATATGGTATCCAAAACCTTTAAATTATATAGCACTAAACTGCCCAACTAATCGAAGGGATGAACAAAACGATCAAACCATCTCAGAAGTATATAATTCTTTACAAAAAGATTTATTAAAACCAACTGGAATCGAACAACAAATCGATCAAAAAAAAAAAGAACTAAATTTGTTATTTAACAAAAGAAATATTTATTCTAATCTGTATCATTTACCAAAAAATGCTCCTAAACGTACTATAAATAAAAATGGTTTAAATATTGTAAATATTGATGAAATAATACCAGGGATTCTAATTAAAGATGTCATTAATATGAAACTT…	2547	828	0.0586293
PF3D7_1328300	PF3D7_1328300-e3o3	AGCAAAATTAACGGTTTCCTAGATATGACGATGACTCATTCAAAAATTTTGAAACCCTATATGGAAGCTTTAAAAGAACTTAATACCGAATTTTCCATATTATTTATCATATTAATATTAATGTTTTTAACGGCGACATGCATACTTCATGTAGTTTATGGTATCCTTACGATGAAGAATGAAAAAGACATGTACGAAAAGAATAGTGTAGTTTATGTAACGAATAAAATGACAGTAGACGAATATGAAGATAGATCTTTTACTTACAGTGAACTTGCTAAATTACATGATGATAAAGATTATATTTGTTTAAAAAATAAAAGAGCAGGTGAAGGTATGGAATCATGGAATTGGCAAATAAGAAAAAATAAATATAATACATATGATAAAGATATTTGC…	429	825.5	0.0581583
PF3D7_1328000	PF3D7_1328000_e1o1-s3	TTAATTGATTTTAGAAACTCACATACGAATAATATCAATATGTTAACAGAAAATCAAAAGTTTAATAATGTATTATTGAATAAAGAAATTCAGATGGATGAAAATCAGGAACGTGAATTTTCAATTGATGATTGTTTAATGAACTGCCTGAAACATAATGCATCTAATTTAAAAACCAATGAAGATTATGAAAGATATTGTAATGAAGACAAAATATTGAATCCAGATTATAAGCCTTCAGAATCTAGAAAACTGGGAGAAAAATTTTTGCAAAAAAGTCAAAAGGAATTATATTATTCTTATGCGAACAATGGTTTTCATTGTGACACAAATTTAAATAATGCTGAAGTTGGGAATAGTTGTTTTAAAAATGATAATGGGTATAGTTCATATAATGAT…	1500	821.5	0.0578151
PF3D7_0402000	PF3D7_0402000_e2s1	GATAAATATGAAGGATATGCTGCTTCAGGTATACAAAACAATAATGTATATTTAAGAAATTTATCAGAGTTACAAAAGGGAAATCAACCTTGCTTGAGACATACAAACAGAACGGATAATTCAAAGATGAACAAAGTCAAAAATAATAATCAGACAGAAAATAATGACAACAAAAAAAAGCTAGGTAATAAGGAAGATAACCAGGGAAAAAATAAAAATAATAATAATAAAGAAAAACAAAATGACATTAATAAAAGAGGAACACAAAATACCGAAACTAAAAAAAGTAATAAAAAATTAAGTCAGGACTATAATGATGTAAATAAGAAATTTACAAAAGAACAAATGAAAAATTTAGTTAATTCATTAGATGAAATTCCACCCCGAAACGATATGGAA…	1134	772	0.0576101
PF3D7_0310200	PF3D7_0310200_e1s1	ATGGATGGTGATATATCAAGGAAGAGTTATGTAGAAATATTAAAATATTACAGTAAAGATGAGAATAAATTAGGAGGACATAATTTTGGGAAGAATAAAAAAAAGGATTTAAATAAATATGATATATATTATAAAGATTATTTATATGATTACTATAAAGAATGTAATAATAATATTAATAATAATAGTAGTAGTTATTATAATAAATTCAATACAGAATATACAGATTGTTTAAAAACAGATAATTCATTTTTCATGACAACTTTAAGTAATTTAAAAAAAGATAATGATGATAATGATGTAGATTGTATTAACAAAGGTGGTAGTTATAGTAGTAATAATAATAATAATAATTTTTGCTTAAATGTTGAAATGTTGTTTTCTTTTTTATTTTGTAAA…	2775	821.5	0.0563501
PF3D7_1433200	PF3D7_1433200_e1o1-s1	ATGAATGAAAAGAAAAAACTTGATATTATCCGTAACATGCTAGGAGAACTTCTGGGAAACAAGGAGGATAAGAATAATAAAGGAAATGAAAAGAAGGATAAATTAAAAAAGAAATATATTGAAAAATCTAAAAAAGTTTTACATTTTTATAGAAATTATATGAATATTTTAGATAAAGAGGAATTAGATAAATTTGAAAACTTCTATAATATGGTATTAAACAATTCTTTTGATTATTCTAAAAAAGAAAATATAGATATTTATATGTATTGTAATATATATCCTATATTAAAGAGAACATTTGAATCGTTTGTTTCTTATCTTTCTAATTTATTAGAACATAAAGATGATGATAATTATAAAAAAATTATAAATAATTTTGATCCCATATTATTATTT…	1500	772	0.0560437
PF3D7_0418000	PF3D7_0418000-S5_C	ATGCTCGAGCATAACGGTAACGAGAACTCCGACGATATTAAGCACCCGTACCCGTACGACCGCGAGATTAAGAGCGAGGGCAGCACCAACAAGTCACACATCCTGAGCAGCCACCTTAGCGGCGACCATAAGGACGAGATCCCGATCATCAACAACAACAAGAAGAAGAATATCTCGTACTTCACCAAGGAAGAGGAGTTCGCGCTTTACAACAACATGAGCATTCCGTACTCACTCAAGTACAAGCAGAACAAGAAGATGGACGTGGACGAGAACCAGAATATGTTGTCATTCTACCGCAAGAACATGGAAGAAAGTAGCAACATCTACACCAACATCTTCAAGAACCTGCAGATCGACAACATCCGTAACCCGTACTACAACACGAACGAAGAGGGC…	1583	817.5	0.0560262
PF3D7_0418000	PF3D7_0418000-S7_C	ATGCTCGAGAACCGTTTCTCGGACAGCAGCAAGAACTACAGCAGCCTCTCCAGCAGCCTGTCCAGCAGCCTGTCATCGAGCCTTTCTTCTAGCCTGAGCAGTTCCTTAAGTTCGAGTCTTAGTTCGAGCCTCAGCTCCAGTTTGAGCTCTTCACTGAGCAGCAGCAACAGCTACATCCACAGTCGTTGCGACTCCAGCAACATCCCGAAGAACATCGACACGAACAAGACTAACAGTAAGCACATCAAGCATATCCACTCAGACAAGTCAAATAATTACTCGATCCTGGTACTGCGCGAGTCTAATTACAACTTGCTGGACCTGAAGACCGCTGAAGAGAAGTTTATCTGTATTAAGATCATCGAGGGTAACAACGAGGATAGCGAGAAGAGCCTGCTG…	1583	770.5	0.0557428
PF3D7_0522400	PF3D7_0522400_e4s1	GTTAAATATAATCTTCTTGTTGAACCCGAAATTGTTAGGAACAAGTGGTGCCTATGCATAGGAACGTGCATTCAAATTGAAAATAACACGGGACTATATTTTCGAATATACAAAGAAGGAAAGACAAATTACTTTTCAAGAGTAAATTTCAAATGGTATAAACGAAAAAAAAATAAATCCAATAGTAATTATTCCATGTGGGAAAAAGGCACAAAGAAAGGTTCCCATGAAAGTTCTAAATCAAGAAATGATATAATGAAAATAAAAAGTTATAACAGAAATTTTATATCTTATATGGATAAACTAAAAAAGAAGAAAAAGAGGAAAGAGAAGAAAATAAAAGATAAAGATTATATAAATATTTTACCTTTTAGTAAAAGAGCTATACCTATATTTTGG…	2667	825	0.0541336
PF3D7_1122900	PF3D7_1122900_e2s3	AAAATATTAAATACAAAACTTATATCTTGTATGAATTATAATAGAGGCAATTTTACTATTAATCCAAGATTAATTAGACACTTTTTTATATTAAATATTAATTTTCCAGAAAATAATACAGTCAATAGTATATTTAGTGTTTTATTAAAAAATCATTTTAATAATTTTAAACAAGATGTATCTGATTTAATTCCATCTATATTAAAATCTACTATATCTTTATTTTATAATATTGAAAAGACATTCAAAAGAACAGCTACTTATTTTTATTATGAATTTAATTTAAGAGATATTCATAGTATAGTTAAAGGATTACTTACTACAACACCTGTTACATTTCAAGATTGTGATAAACTTTTATTTTTATGGTTACATGAATGTGAAAGGGTATATTCAGAT…	2619	823.5	0.0539435
PF3D7_0523400	PF3D7_0523400-e3o4	AATAATCAAATAGTTCCAAAATATAATAATAATTATGAAACCGAAAAAGAAGAAAAGAATTTAATCAGCAATATATTTTCAACGAGAAGACCAAAACATGCAGGAGCAGGTTTAGTGTCCGGAATAAAATCTGTTACTAAGGGAATAATAGTTGGAACTAGCTTTTTATTTATATCTCCATATTTATGTGCAAAGGCTGAAGGTATTAACGGTTTTTTTAAAGGTATGTTTTTTGGACTTTTAAGTGCTATAATAATTCCAGTAGTTTCATTAGGTGTAGCTAGCTATCAAATAGGTAGAGGAATTATGAACACACCTGAATCAATTACTCAGAAAGCCTTGGGAAAAATATGGGATGATGAAAAAAGAGAATGGTATGATTTTTATTATAATTTGGAT…	1509	833	0.0538392
PF3D7_0106300	PF3D7_0106300-e3o3	AGCACCTTATCTTTATCCGTTTTAGTTTTAATAGAAATGTTTAATGCTTTGAATGCCTTGAGTGAGTATAATTCCTTATTTGAAATACCACCATGGAGAAATATGTACCTAGTATTAGCTACTATAGGTTCCTTACTTTTACATGTCTTAATACTTTACATTCCACCCTTAGCTCGTATTTTTGGTGTTGTTCCATTAAGTGCATATGACTGGTTCTTAGTATTCTTGTGGTCCTTCCCAGTTATTATACTTGACGAAATTATTAAATTCTATGCAAAGAGGAAATTAAAGGAAGAGCAAAGAACCAAGAAAATTAAAATTGAT	324	769	0.0532633
PF3D7_1124000	PF3D7_1124000_C	ATGCTCGAGATGAAGATCTGTCTGATCCCTGTGTTCCTGTCATTGATCATTTACGTGATCCTTTTCCTGAAAGGCAAGAAGATTGGCGACTTGTACATCACCGAACACCTGCGCAACAAATTCGAGAACATCCTGCTTTACTTCAACATCTTCGAGGTGCAGTATCCGGAGTCTTACCTGAACAACGAGAAGCTTCTGGGTCTGCACGTCCGTGACATCGAGAAGGACGCCTATCGCGCCTACCCCATTCTGAAGGAGCTTAAGCAGAAGGACTACTTCCGCATCTTTAAGGTGAACCTGCACCTGTCTTGTAAGGTTTTCTTGAAGGGAAACGAGAAGTGTAAGGAAATCAAGAAGTGCTCAGTCTGCGAGTGCGAGCAGGACGAGATTCCGTACAAC…	1478	823	0.052661
PF3D7_1205500	PF3D7_1205500_e1s1	ATGAGTATATCAAATTCAAGCGAGCAAGCTAATCATAAAAATATGGAGGATGATTTAAATTTAGGAGAAAATAATAATAACCATAATTTTATATCTAATGATGATGGTAGTTTTATTGATGATAATAATATAATTGAAGATGAGTGTATTACTCCTAAGGATGATGAAGAAAATATAAATTCAAAAAGAAAAAAAAAAACTGGAAAAATGAATAATGAGGAGAATAAAAATATAAGATTAGGAAGAAGAAATGATCAATCTAGATGTGATCAAGGTAACACAATAAATTATCTTCAACAAAATAATAATGTAAATATTAATTCTGTAAGTAATGCCTTACATAATGTAATAAATGAAGTCATGAATAGTTGCGTGGCTCACATGAATAATAACAATAAT…	2709	769.5	0.0526022
PF3D7_1248600	PF3D7_1248600-e1o3	ATGAATTCAAGAACGTATTGTGTTATTTTTTATGGTATATCCTTGCTTGTATATGTTATTATCATATTTTTCTTAAATAGATTTGAAAAGCAAACAATACCATATGAACGAATTAAGGATATAATAAAAATCATTAAACATGCTAATAATAATATAGGTATAATAAGTAATAAGATTGAAGATGGAAATATACAAATAAAACATCAGAACAATTTTTTAATAAATTTAAATATTGTTTCGGGGTGTGCAAATGATAACATTGATATGTTTGAGGAGATGTTAAAATCATATATTGAAGAAAAAATAAAATTAGAAAATGATAAAATTGTATCCTCATTTTTATTAGAAGAATTAAATAACGTACAAGATATTTTTACAGTGACTATAAATGTAATTAAT…	2079	768.5	0.0525509
PF3D7_0930000	PF3D7_0930000	ATGTCCAAAGATGAAAAAAAAATAATAGAGGTTCTAAAGGAAAAAATCGAAAAGACCAAATTACACGTTTTAACGTTTGCTACTCATGAACAAGGCTATTTCAAAACCTTAAAAGAAAGTTGCAAAATTTTAAATATCGATTTAAAGGTATTAGGAATGGGAATAAAATGGAAAGGTTTTATAGAGAAATTGATTAAGGTAAAAGAATATTTAAAATTATGTAACGATAAAGATATAATCCTTTTTGTAGATGGTTTTGATACATTTTTTGTTCAACCAGCAAATGTAATTATTGAAAGATATCTTATGAATTATGACAATTTTTTTGTTTGTACTAGTGAAGGTGCATATTCAAGTAATATCCTTTTTTTACGTATTATTGAAAAAATGCATTTGGTT…	1674	819.5	0.0520879
PF3D7_1370300	PF3D7_1370300-e2o2	AAGAGTGAACATAAAGCCAAAAAGTTACATTTAGAACAAGAAGAAAATGATGACGACTATCATCATTATCACCATGCACCTCATTTCTACCCATTTTTTGATCCAGAATATATGCATGATCACGACCATGATCACGAACATGATCACACAATTAAACCTGCACACGCTCATGAACTTGATCATGGACATGACCATGGACACGATCACGGACACGATCACGGACACGATCACGGACACGATCACGGACATGGACATGGAGGACATGTATGTACATGCAAAAATAAAGCAAAAAAGAAACCAGGAGAACCATGTGATTGCCAAAAAGCAAAATTAGAACAAGAAAAAAAAGATAAT	354	822.5	0.0512019
PF3D7_0416800	PF3D7_0416800_e3s1	GGTTTAGATAATGCTGGAAAAACAACTTTATTACATATGTTAAAAGATGATAGGGTTGCTCAACACGTGCCTACCCTACACCCCCACTCGGAAGAATTGGTTGTGGGTAAAATTAGATTTAAAACATTCGATTTAGGAGGACATGAAACAGCAAGGAGAATATGGAGAGATTATTTTGCTGCTGTAGATGCTGTAGTTTTTATGATTGATACTACTGACAGATCACGATTTGATGAAGCAAGAGAAGAATTAAGACATTTATTAGAAACAGAAGAATTAAGTAATGTACCATTTGTTGTTTTAGGTAATAAAATTGATAAACCTGATGCAGCTAGTGAAGATGAATTAAGACAACATCTTAATTTATTTTCAAATATAACTGTTCATAATAATATGAAA…	498	817.5	0.0504067
PF3D7_1104400	PF3D7_1104400_e1s1	ATGAAAACAAATATCTTCTCATGCGTGATATCCTTTTTTATTTTGTTGCTTTTTTGTAAAGCTTACAATACTTCGTCCTTACTAGAAACCATAAAACATGATCTTCAAATTGTAAATAATTCCAACTTTAATACAGTAGTAAATAAGTTTAGGAATGAAAAAGTGTTTGCAGTTTTATTTTTTAAAAAGTCTAACAAGAATATAAAAAATGTAATAAAAAATTATAATGATGTAGCATCGAAATTTAAAGGAATATTAACATTATGTGTTGTCGATTGTGATGAAAATGCATCCTTATGTGAAAATGAATTATCATTATATGTACCAGATTATAAGAGCAGTAATACACATCACTTCTTAATCTATCCTATAAATCCAATGCCAAAATTTGTATTTAAG…	990	828	0.0500311
PF3D7_1034000	PF3D7_1034000	ATGTCTCTGAACATTCAAGAACAACAGAAGAATAGTGCGATAAGTATGCTAAATTTGAACGAGTACCAAGAAAATGGAAATAACAGAGGGAATATATTGTACTATTCACATGACAAGATATGGAAAATTTTAATATATGATAAAGAAGGACAGAATATTTTAGCTCCATTATTAAAAGTAGGGAATTTAAGACATCATGGTGTAACATTAAATATGAATATACAGAGAGAAAGAAATTCGATTCCAGAAGTAAATGCTGTTTATTTGATTGATAATAATAAAGAAAATATAGATAAGGTTATTGAAGACATGGTAAAAAATATGTATGGTAGTTATTATATAAATTTTTTATCTTATGTTAGTCAAGAAAATTTTGAATATTTTGCAAGTGAATGTGTA…	1989	767.5	0.0499372
PF3D7_1403800	PF3D7_1403800_e1s1	ATGTCTACTAATTATACAAAAGATTATAATATAAATATTGAGAGAGATAATTTAAAAGAGGAAAATGTTCATGTTGTTATGAATGATGAATCTGTGGAACAAATTAAAGATAACAATCCTATGATTGATCATAATACATCATGTATTGTAGATATAAATGAAAAGAATAAATCTAATTATGTAGATTTGGGTACTCTAGATTTCAGTGCATATAAAGAAGATTCACAAGGATGTATTCAATATTATGAAAATAAGGAAGACGTCCAAGAGCAAAAACAGGGTAAGTCTCAAGAAGTAGAATCGAAGAGACATATGAGAGTAAATTCATCAAGATATGAAAGTCAATATGGTATAAAAAATAGAAACATTTTAAAACAATCAATATATGTTAAACAAAAT…	2208	830	0.0497545
PF3D7_0316600	PF3D7_0316600-e2o4	GGGTTGTTTTATTATCACAAATTAAGAGAAATCGTAGGAGCATCGATGAGTGTGTTTGTATATGGTTTTACCTTTCCTATAGCTTTTATGTGTATTATATGTACAGGTTCTGATTTGTTTACGGGTAATACTTTAGCAGTAACCATGGCATTATATGAGAAGAAAGTAAAACTATTGGATTATTTGCGAGTTATGACTATATCATTATTCGGAAATTATGTTGGTGCTGTATCTTTTGCATTTTTTGTTTCTTATTTATCTGGAGCATTTACTAATGTTCATGCTGTAGAGAAAAATCATTTTTTCCAATTTTTAAATGATATAGCTGAAAAAAAGGTTCATCATACATTTGTTGAATGTGTGTCATTAGCTGTGGGCTGTAACATATTTGTATGTTTG…	603	821	0.0496354
PF3D7_1223400	PF3D7_1223400-S3_C	ATGCTCGAGCATCGCGTCTTCCAGACGTTTCTGTCGTTCTTGATCTGCAACAACATCCGCACTTTGACGAAGGAGTCTAGCAATAAAGAGAAGGAGAAGACAAAGAAGAAGAAGGAGCGTAAAGAGAAAGACTTCCAAAAGAATTTGTACTACATTCTGAAGGTGAACCGTAAGAAGAAGGACGTACAAAAGAACAAGAAGGAGAACAACTCCGATAACGTGAAGAGTAGCACCCAGAACAAGAAGAAGAAGCACTTTTCCTCGAACAGCTCGGAAGACAGCGAAACATTCAGTCACAGCGACGTATCATACCAGTGCAGTAGCCCGGATGAGCTGGCATTTCTGAAGTACGCGACCAACTGCGGCTTCATTCTCAAGAAGAAGACAGCCAGTAAGATT…	1583	766.5	0.0487434
PF3D7_0719200	PF3D7_0719200	ATGAATAAATATGAAAAGATTAGAGATATAGGAAAAGGAAATTATGGAAATACAATACTTGTTAGAGATCGAAAAAATGACCATTATGTAATGAAAATAATAAACATTTCACAAATGTCTCAGAAAGAAAAGAGGCAATGTTTAAAAGAAGTTGAATTATTATCCAAATTAAATCATCCTTTTATTGTAAAATATATTGAAAGTTATATTGAAGGGGATACACTTAGAATAGTTATGAAGCACTGTAAAGGAGGTGATTTATATCATTACATCCAAAATAAAAAGAAACAAAATACGCCTATAAAAGAAAAACGTATACTCATCTGGCTAACTCAAATATTAACTGCTCTTAAATTTCTTCACTCAAATCATATTCTTCATAGAGATATGAAGTCTCTA…	930	829	0.0481996
PF3D7_0402000	PF3D7_0402000_e1s1	ATGTGTAATAAATTGTCAAGGGGTAGTAATATGAACAAGTCAGAATTAGGAGATAGGAGTACAAAAATGAAAGGAAAGATTTGCTCAAGTTACGTAAAATATATATGTTTAACAATATGTGTTATAGGAATGTTATGTATAAAATTAAGG	150	821.5	0.0479142
PF3D7_1111300	PF3D7_1111300	ATGAATAAAAAGTATGAACCAATATTAGATAATGAATTGTTATCATCAAATAATGAGAATGAAAATTTTGTAAACAGCAAAAAAAAGGATAATGAAAATGACAAGATTCAAGACACTAGTTTAAATAATATATATGGAAAGATAGTAAAAATAAGAAAGGAGTTAGAAAAATCATATAATTTATTTTATTCGTATAATTTAATTGTATCAAATAATAAAGAACATGATCCTAATTCTCCATATAATAATGTGTATGCAAGAAGTGATATTATAAATATAAATAATAATACCAAAAATAATTTGACATTAAATAAAATAAATGCCTTAACAAATTCATTTTATATGAATGTTCAGACTTTAAAAAATACTTATTCATTTATTAATACAAATAATGTAAAC…	867	766	0.0468099
PF3D7_1104600	PF3D7_1104600_e1s1	ATGAAGGGGAACTTAATACTCTCTCTTAACAATGCTAAAGATTATCTAAAGAATAAAAACGATGAAGGGAATAATGTATATGATCATATTTGTGACATCATCAATTTTATTGTTGTTGAAAAACCGGAGAAAAGTTATGAAAACTTTGAACTTATATCAAATCATATAAAAGAAAGTAAAAAATGTAACCATGTAAGAATAATAGATGAAAAAAAAGATGAAGGGGAAAGGGAAAAAAACAATCTAGATAATTATATATTAAATGAACACATAAAAAAGAAAAAAAAATGGTTACATAAAATGAAAAAATGGTACTTCGAAAATAATATGGAAAAGAAAAAAAATAATAAAACATTATTGTTACCATTCTTACATAATATATTTGAACAAATGAAATTA…	1929	813.5	0.0455552
PF3D7_0729900	PF3D7_0729900_e1s2	ACATTTGAATTCATGGTTGATGAAGCCATGAATAAAAATAAAATTGTTTTAGATTCATTAGAAAAAATGAAAACATGTGAAGTATGTTTTGATTGTAATGAACTAAAATCGTTAATTGAAATTATTCAGAAAAAGGCAGATGAATTATATCTAGAACATTATAGAAACGTACATATATGGATTGAAGAATTGAATATACATATAAATAAAATATTAACTGAGAGATTGGAAGAGATTATAAAAACATGGACATGTGAATTTGTTAATTGGCCTAATAATGGAAAAAGGTTCATATGTAAAGAAAATATACATGAATTTAAAATAAAAAATCAGAAATTTTATTTACATCCATCTATTGATTCAATGAGACAAATATGGTTCTCAAAATTATCTGACGCA…	2643	828	0.0453526
PF3D7_1035300	PF3D7_1035300-S2	GAAAATGTAGAAACCGAGGAGATCATCGACGATGTTCCGTCACCGAAACATAGCAACCATGAGACCTTCGAGGAGGAGACGTCTGAATCAGAACATGAAGAGGCGGTCTCAGAGAAAAACGCACATGAAACCGTGGAGCATGAGGAAACGGTGTCGCAAGAGTCAAATCCGGAGAAAGCGGATAATGACGGCAATGTGTCACAGAACAGCAATAATGAGCTGAATGAAAACGAGTTTGTCGAATCTGAGAAGTCCGAGCACGAACCGGCTGAGAATGAGGAATCTAGTCTGGAGGAAGGCCACCATGAAGAAATTGTGCCAGAGCAGAACAATGAAGAGAGTGGTGAAAGTAAACTTGTCGATAACGATGAAGGTGGCTTTGAGGAGGCACACCACGAA…	1281	818	0.0447684
PF3D7_0414000	PF3D7_0414000_e8s1	TTAAGCAAACATGGTTTTATGTACGGTGGGTATAATAAAAAAAAATATGGTATATATACAGTTTATAATAAATTAAAGGAATTAAAGGAAGAAGAGAAAAAAGAAAAGAGTCATATAGAAGAATTAAATAACAATATTGAAAAAATAGATGACGAATTAAGAAATATTTATGACACAAAATCAAGTACTGTAGCAAAAAAAAATGGATGTGCAAGTACAATTAATTCAATAAATAATAATATTTACTCAAATGAAGAAAATATCAGATTGACAAGTGAAAAAATTAATTATATACAAGAGAAAAAACAAAATCTTGAACAACATAAAGATCAATTGAAAATGCAAATATTACAACTACGAAATAATAATGTTAATCCTGATGAATCAGAGAAAGTCGGA…	522	830	0.0441101
PF3D7_1241700	PF3D7_1241700_e2s1	GGTGCTCCTGGTACGGGTAAAACGACAAGCATATTATGTCTGGCAAGCGAAATGCTCGGAAATCAAGCAAAAAAAGCTGTTCTGGAATTAAACGCATCAGATGATAGAGGAATTAATGTGATAAGAGATAGAATAAAAAGTTTTGCAAAAGAAATAATAAGTTTACCACCAGGAAAACATAAAATTATTATATTAGATGAAGTAGATTCTATGACAACAGCAGCTCAACAATCTTTAAGAAGAATAATGGAATTATATTCAGATACAACTCGATTTGCTTTAGCTTGTAATCAATCGGAAAAAATTATTGATGCACTTCAAAGTAGATGTGCAATTATTAGATATTTTAAATTAAGTGATGATCAAGTTTTAAAAAGAATATTAAAAATATGTGATTTA…	843	764	0.0435893
PF3D7_1421100	PF3D7_1421100-S2	GATAACAATAATAATGACAATAATAATAACGATAACAACAACAATGACAACAATAACAACGACAACAACAATAATGATAACAACAATAACGACAATAATAACAATGATAATAATAACCACAATAACGATGAAAAAGGCGAGAAAGACATGCTACGTTTGTATTACAAATATATCAATAAGTATGCCAATACCGAATTTATGAAACTCAACGAGTTCCTCCTTTATTACATCAGCAAAGAGACAGTTATCGCGCTTTTGCGGGACAATATTAATTACAACGATGTGATCAAAGATTTGAATATCATAAAATACTCCACCTACCTGGAGAAGTACATATTTCTGGAAATCTGCACGAATAATATGAACAAGGAGCAGTACTCGGACATCATCTTCCGCGAC…	1245	817.5	0.043075
mal_mito_3|P	mal_mito_3|P	ATGAACTTTTACTCTATTAATTTAGTTAAAGCACACTTAATAAATTACCCATGTCCATTGAACATAAACTTTTTATGGAATTACGGATTCCTTTTAGGAATAATATTTTTTATTCAAATTATAACAGGTGTATTTTTAGCAAGTCGATATACACCAGATGTTTCATATGCATATTATAGTATACAACACATTTTAAGAGAATTATGGAGTGGATGGTGTTTTAGATACATGCACGCAACAGGTGCTTCTCTTGTATTTTTATTAACATATCTTCATATTTTAAGAGGATTAAATTACTCATATATGTATTTACCATTATCATGGATATCTGGATTGATTTTATTTATGATATTTATTGTAACTGCTTTCGTTGGTTATGTCTTACCATGGGGTCAAATG…	1128	818	0.0428572
PF3D7_0201900	PF3D7_0201900_e2s1	TTTACGGTTGTTAAGAATTATAATAAAATTGACAATGTGTATAATATATTTGAAATAAGACTTAAAAGATCATTAGCCCAGGTTTTGGGGAATACAAGGTTAAGCAGTCGTGGAGTAAGGGATCCTAGAACTAAGGAGGCATTAAAAGAAAAGCAGTTCAGGGATCATAAAAGAAAAGAGGCTTTAAAACAGAAAACTGAAAAAAATGAAAAAGCAAGAAATGCTTTAAAGGAAAAGAAGTTAAAAGAACAAAAAAAGAATGACGCGCAGAAAGCAAAAGATTTAACAAAAAAGGAAAGCCAAGACTCTTCAAGTGAAAAATCACTAAAGGAAAAAGTAAATGGAGAAGCATTAAAGGAAAAAGAAAATAAAGAAACATTAAAAAAAAAAGAGTTAGAA…	2442	816	0.0414632
PF3D7_0825900	PF3D7_0825900_e1s1	ATGTTAAATATTTTTTCCAATGAAGATTTATCGCTACCTGCAGAAAAGGAAGAAGAAGAAGAAGAGAAATTAGAAAAGTCTAAAGATAAAAAAGATTTAGATAAGATTGAGAGTAAAAAGATAGACAGAAAATTTTCTCACGGTTCATATTTATCCAAATATGATAGTAAAAGGTTATATTATAATAAACGTTTGGAAACTAAAATAAAATCTTTAAGGAAAAGCTTTAGGAAACGTTATAGGATCGTAAGAAATAATTTAATGAAGTTAATAAAAGTATTAAAAGAATTTCCTGATATAAAACAAATAAAAGAACATGAAACAACAGATGGTAAGATTACAATCAATATTGATGTGGTTCAAAAATTAAATAAAATTATGGATAAAATAAATATAGAA…	1911	825	0.0411961
PF3D7_0405300	PF3D7_0405300_e1o1-s1	ATGGAGAAGGGTTCTATTTTATCGTTTATTTTCTTTTGTTCTGTTGTTATCTTTATACGATTTATCGGATATTTCTTTTGTAATCGTTACATGACAGAAGAACCATATAATAATATTTTTGAGATAATAAAACCTGAGAATTTATATAGTTCTTTATTATTATTGTCAAATGAAAAGGAAAATGATTTTCCTAGTTCTACAAATTGTAACGGATATATGAAATGTATCCCCTTTTATAATAATGTTTCTGAAAGATGGAAGAGATATAATTTTATACAACTTTATATAATTAGAAGTGCATTAAATATACATGTGATGAGTAAATATAATATGTTAAATAAATATAATAAGGAAACGAACAGATTATTAAAAAGAAATAATAATGTAGAAAATAGAATT…	1500	826.5	0.0406474
PF3D7_0827900	PF3D7_0827900_e2	TGGTGCGGTCATTGTAAAAGGCTAATCCCAGAATATAATGAAGCTGCAAATATGTTGAATGAGAAAAAGAGCGAAATAAAATTAGTAAGTATTGATGCTACTTCAGAAAATGCTCTTGCTCAAGAATATGGAATAACAGGATATCCAACTTTGATTTTATTTAATAAAAAGAACAAAATAAATTATGGAGGCGGGAGAACAGCTCAATCTATTGTTGATTGGTTATTACAAATGACAGGTCCCGTATTTAGTCATGTTGAAGGGAATATTGAAGATGTCTTAAAAGAGAAGAAAATCAATGTGGCTTTTTATTTAGAATATACTTCAGAAGATAATGATTTATACAAAAAATTTAATGAGGTTGGGGATAAAAATAGAGAAATTGCAAAATATTTCGTA…	1275	830	0.0403318
PF3D7_0417000	PF3D7_0417000-e2o2	CAGGTTCTTTTTCTAGAAAAAAATGTTACGTGGTATGAAATGCCGACTCCTCCAATCTCATGTAGACAAACAGGTTGCCCTCATACATATCAGATATGCGCACCTATGTATGTTGATAATAATAAATTTGAAAATACAACTATTTTAAAGATCATTCAAGAAGCCTTAAATATTTCCTCCAGAAAAGAAATAAAATTTCCAAATATTGATATACATAATTCATATGAACTTGTTTATACCTGCATTTGCAAGAAGTATGCTCAAAATGGTTTCTGCGATGAAACGATTGTA	291	763	0.040184
PF3D7_1346400	PF3D7_1346400_e1s2	GATGAGGACAAAAATAACGATAATGAGGATAATAATAACGATGATGATGAGGAAGATGAGGATGATGATGACGAGGATGACGAAGAAGCATTATTACAAATAAAAAAAATGGAACAATCCGAATTATTAGAAGGATTAAAAGAAAGAGGAGAAAATGTTTATAATAGAGCTGTTCAACACCTTCCAGAATTATTTGAGTTTTATATACATATATGTGGTCCCATTTTACATTTTGACAATTTAACGAATGGCATAGTGGAATTGCATTTAGGTAATTTGGTAGCAAAAACAGAACACCCATGTACCTATAATAAATTTAATTTAATATTTGAATTTAATGAAACGCAAATAACATGCTTAAAAATAGGCTCAGGATATATGAAGAAGGATGAAAAATGT…	3039	825	0.0398148
PF3D7_1422700	PF3D7_1422700_e1s2	CATCATATGAATAAAAAAGTAAAAAAAAAAAATAATTTTTTTGTTATGATGGATGAGCATCTATTAGATATTATCACTCATTATATTATTAAATTAAATAAGGTTCCGTTGTACTTACGATTCTTACCTTCATATAATATAGGTTCCATGACAGATATTAAAAATGAAATTAAAAAATTACAATTCCTAAACGAGTTCTATAAAATCTATTTCGAAAAATATAACAAATGGAAAGTAGTTATTATAAATAATCGTATACATATATTTGATAAGGAAAAAAACAAAAATAAAATTAATGCATTAGATAATAACTCTACAGAAACAAAAAATAATCAAGAAAACAAAAAATTAACAGAAGAAGAAAAAGAATTAATTCATAAAAAAATACAAAAATTTAAA…	1809	808.5	0.0392821
PF3D7_0723200	PF3D7_0723200_e1s1	ATGAAGATGAAAAAAATAATAATATTTGTTCTCTTTTATTTTATAACTCCTAAATTATGCCAATTTGAAAAATCATTATTTAATTATTTAGGCGAAGTATCTTTTATAGAGCCCTTTGAACATTTGTTTGAAAAATGTCTTGAAATTCCTAATACTGTTTGTTTAGGAGGCACTGGTACTATTATCACACCTCATAGTTTTCATAAAGGGTTGATAGGAAAATGGACATTTGATGATATGTATGCTCTTGACTATAGTTCATATAATAATCATATGCACAAGTATATACGACCTGGTCCTGGTTTCAATGGGCATGGTTATAGTGGAGCCTTCATTGGAGAT	342	810.5	0.0388289
PF3D7_0936800	PF3D7_0936800_e2s1	AATTTATCAATATTTGAAAATAATAATAATAATTATGGATTCCATTGCAATAAAAGACATTTTAAAAGTTTAGCTGAAGCAAGTCCAGAAGAACATAACAATTTAAGAAGTCATTCAACAAGTGATCCAAAGAAGAATGAAGAGAAATCATTAAGTGACGAAATAAATAAATGTGATATGAAAAAATACACTGCTGAAGAAATAAATGAAATGATTAACAGTTCTAATGAATTTATAAATAGAAATGATATGAATATAATATTTAGTTATGTACATGAATCTGAGAGAGAAAAATTTAAAAAGGTAGAAGAAAATATATTTAAATTTATTCAAAGTATAGTAGAAACATATAAAATACCAGATGAATATAAAATGAGAAAATTCAAATTTGCACACTTT…	1044	808	0.0387587
PF3D7_0304600	PF3D7_0304600	ATGATGAGAAAATTAGCTATTTTATCTGTTTCTTCCTTTTTATTTGTTGAGGCCTTATTCCAGGAATACCAGTGCTATGGAAGTTCGTCAAACACAAGGGTTCTAAATGAATTAAATTATGATAATGCAGGCACTAATTTATATAATGAATTAGAAATGAATTATTATGGGAAACAGGAAAATTGGTATAGTCTTAAAAAAAATAGTAGATCACTTGGAGAAAATGATGATGGAAATAACGAAGACAACGAGAAATTAAGGAAACCAAAACATAAAAAATTAAAGCAACCAGCGGATGGTAATCCTGATCCAAATGCAAACCCAAATGTAGATCCCAATGCCAACCCAAATGTAGATCCAAATGCAAACCCAAATGTAGATCCAAATGCAAACCCAAAT…	1191	812.5	0.0386232
PF3D7_1348800	PF3D7_1348800-S4_C	ATGCTCGAGCCAAACAACAAGTACTCGTACAACTTCTTCGAGGAGAAAGACATTAACAACATCATTTGCTCAATTCTCAGCAAGATTACGATCCTGCTGGTAGTCTTCTTGTTCGGCCACTTGTTCATCCCGGAGAACAAGTGGATTTTCATTACAGACGAGATCCGCGAAAACTTCGAGTTCTCGGAGTTCAGCTTCCTTATCGACCGCCAGCAATCCAACTACTTCCATACAGTGCGCAGCAGCCTGCGCTTCAAGAAGAACCTGGAGAACCTGAAGATCCAGAACAACATCGACATTAAGAACGACTACCGCACGCTGAACGAGTGGGAGTACCACATTTCGCCGTCCCGCCACGGCACGATTGTATTCAACGTCTTCTTCCTGCTGTTCTTCTTC…	1238	815	0.0386227
PF3D7_1328000	PF3D7_1328000_e1o1-s4	AAAGTAGCAGACATTGAAGTATGTTATTGCCCAACTTTAGATCCAAATTCTTATTATGCGTGGAATGATTCAAGAGTTATTTATACAAATTTGTGTTATAATAAATCGAAAGACGAAGTCGATGCTAACAATAACTCTGTTAATAAAGGAAGATATATGATGAATAAAAATATGGAACTAAAGAATAATGACAAACAAGTATCCTTTAGAAAAAGAGCAAGTGGATGCGAACACCTCATGTTTCAACAAAATATAATGAAACAGAAAAATTTATCGAAAAGAAAAAAGAAATTATTAAAAAAAAAAAAAAAAATGTTAAAAGAAAAAAATAAATTACTAAACAATAATAATAATGATAGTGGTAATAATAAAGGTGATACAGAAATAGATGCTAATGCT…	1500	761	0.0382679
PF3D7_1206100	PF3D7_1206100_e8s1	AAAATAACGGCACCTTATTGTGCATTTAATGGAGGACAGGATTTATGGGTAGACGTTGGTAATAAAGCGGAAGGGTTATTAATATTACAAAAGTTATTAAAAATACAAAAAAAGAAATGTTGTCATATCGGTGATCAGTTCTTACACTCAGGAAATGATTTTCCAACAAGGTTAGATTTATATATA	186	824	0.0380616
PF3D7_0532100	PF3D7_0532100	ATGAGATTCTCCAAAGTATTTTCTTTTTTCGCCTTTTTCATTGCCCTTAAATATTTTAACAGATGCCTTGGTGATCAATTAGATATGGGTTCCGTACACAATAACAATTCCGTTGTAGGAAACTCATCATCACATTCACCATCATCATCATCATCTTCACCATCTTCTTCTTCTTCTTCATCATCATCATCACCATCTGCATCTTCATCTTCATCCTCATCATCCCCAGCTTCCTCATCTTCAAGCCCATCAAGCACATCAGATGACAGCAAAAATGCATCCTTAGATAAAATCGATGAAGAACTCCAAAAGAAAAAGAAAAACGAAAAATTACTTTTAATATCCTCTATTGCCACAGGTTTAGCCGTTTTAGTAGGTGGAATAATAGGTACTGCTTTA…	543	821	0.0380349
PF3D7_0603600	PF3D7_0603600_e2o3-s2	CCTATAAATAATTATAAAATAAATAAAAATAATAATATAAATGAGGGTGTGCCATCTTATTATTTAGAATATAATTTGGATAAATTATATGGGAAATATTGGAAAAAGGGTGGTAAAAAAAATTATACTTTTTCATTATTGGAATATGAAAAAATAAGTAATGATCCACGTGGTATATATATAGATCATAAAAGAAAAGAAAAAAATGATAAGGGTGTTAATAATGGTTTTACAAATTGTCGTAGGAATTTTACGTACCCATTAATTAATGGAACTTTTGATGATATAAGCATAAAATGTTATGGAAAAAAAAATATAACTGAAGTTTATAATACATGTGATAATATTAAAAAGAAACAAAATATTAATTATCTTATGAATAAAACATTTGTAAATGAC…	1500	815	0.0373423
PF3D7_0510300	PF3D7_0510300-e3o3	CCTGATTTGGAACAAGAAAGGCTATTAGTTGTAGAATTCTTTAAGTATCAAAAACTACCTGTAGAGATATCCGTACATTTCATTAATGCTGGATTTGACACAGTAGACACATTATGTACATTATCTAATAACTCTCTTGATGATGTAGAAAAATTTAATAATACTAGATGGCTACCTGGTCATAAAGTCCGATTACAACAAACCTTTAATGATATTACAAACCGTGTACGAATATTCAAAGAAGAACGAAATGCTTTAATAAAATGTTTGAAAAGAGAATTTGTAAACCACTCTCCAAACATGATCAATTCAGTTATAGTACCAAAAACTATAAAACCAATTATGGTACCAGTTCTACCTACTGTTGGAACACCAGTTAATGTTTCTGCTAGACCAAAT…	450	823	0.0372787
PF3D7_1115600	PF3D7_1115600_e3s1	ACCTATTTTGATATAACTATCGATGACAAGCCACTTGGAAGAATCGTATTTGGTTTATATGGAAAGGTAGCCCCCAAGACAGTAGAAAATTTTGTAAGTATATGTAAAGGGACGGTTGTAGATGGAAAAATGTTACACTATACGAATTCTATTTTTCATCGTATAATACCCAATTTTATGGCTCAAGGAGGAGACATTACTAATTTTAATGGTACTGGTGGTTTAAGTATTTATGGAAAAAAATTTGAAGATGAAAATTTTAAAGTAAATCATAGTAAAAGAGGATTATTATCAATGGCTAATGCAGGAAAAAATACCAATGGAAGCCAATTCTTTATATTATTTATTCCTACTCCATGGCTTGATGGAAGACATGTAGTTTTTGGTGAAGTAGTTGAA…	495	824.5	0.0372526
PF3D7_1439400	PF3D7_1439400_e1s1	ATGAATAATATTAAATATGTGGAACTTTTTTACAAATGCAAAATATTTCGAAAAAATGGATTGAATAGAATAATTAGAAGAAATGGTGGTACATTTAATCATAACATAAAAGAAAATGAACGTATTCCTCCTGCATCTGAAGATCCAAGTTATAAAAATTTATTTGATCATGCAGAAGATATAAAATTATGGGAAATTGAAGAAAAACAAAATGTGTCTCATAAAAAAGTTGAAGATTTATCAGAATTAGTTGAACCGTCAAATCATCCACATCAATATGAAGGTATTTTTGCAAGAACAAGATATGCTCATTATAATCAAACAGCTGAGCCTGTATTTCCAAGAAAACCGGATCTAGAGAAAGGTGAATTGGCTAGCGGAGCAAATGTAACAAGAACT…	1065	814	0.0371582
PF3D7_1129900	PF3D7_1129900	ATGAGTTCCAAAAAAAAGTCTACAATTATATTGTCCCACTCGGGTAAAGAAGATGTATCTGTATCCGCAGAGAAAAAAGAAATATCGAAAAGGGAGATGAGTTCAAATGATAATGTTAATAATAATGAGAAGAAGAAAGGCTTATTAAGTTATTTAAGTTTGAAAGGATATGATATGCCATCTTCGTTAGATGACCTTTTGAAAAAGGAAGAAATAAGATTGTCCTCAGAACAGAAAACACCCTTTAATATTAATAGGAGTGTGTTATTATTTGTATATTTTATGTTAATAGTATTAACAAATCGTTTATTTTTTGGATGGCCTAATTTATCAAATTTATTGTTTAGAGAAGATACTTATATATGGAAATGTCAAAAAAATGAGCATGGAGAATATGAT…	1827	823	0.0371381
PF3D7_1408000	PF3D7_1408000_e1s1	ATGGATATTACAGTAAGAGAACATGATTTTAAACATGGCTTTATCAAAAGCAATTCAACATTTGATGGATTAAACATTGACAATTCAAAGAACAAAAAAAAAATACAGAAAGGATTTCAAATACTATATGTACTTCTCTTTTGTAGTGTAATGTGTGGTTTATTTTATTATGTGTATGAAAATGTATGGCTTCAAAGAGATAATGAAATGAATGAAATTTTAAAAAATTCCGAACATTTAACTATTGGATTTAAAGTTGAAAATGCACATGATAGAATTTTGAAAACTATAAAAACACATAAATTAAAAAATTACATTAAAGAATCTGTCAATTTTCTTAATTCAGGACTTACTAAAACAAATTATTTAGGTAGTTCAAATGATAATATCGAATTAGTA…	1359	815	0.0362192
PF3D7_1253300	PF3D7_1253300-e2o3	ATACATAAAAATAGCTTAGGTTTTGGTAAAAATGATAATATATATTCAAGGAATTTGGCACAGTTAAAATTAAGTAATTATTCATTATTAAAAGATAGCAAATTCGAGAGCGTAACTGAACAGTTGACAAGAGAGGAGTTATACGAGTTATTTGATTTATTAGTTCAAGTACCACCAAGAACTTATCTTCTTAAT	195	807.5	0.0356542
PF3D7_0924000	PF3D7_0924000_e1o2-s2	ATATGTGAAGATATTAACCTCTTTTGTACAGATCCCATGATAAAATTGAAACAGCATAATAATATCAAGGATAAGAAAAAAAAATCAATAATGAACTTTAACATATTATGTAATAATATTACGAATCGTAATGGAAGTAGTAATATAAATAATAACAAGGTTCCCATTAAACAAGATGGAAACCTTAAATTTAATAAGAAAGACATAAATATGAATCCTGATAATTTGAAAGAAAAACAAAAAAATTTATTATTTGATAGTCTAAATAAAATTTATAAGGATTCTGAACAACCTAATAAGAATGGGAATTTCCCACTTACCAAAAATAATGAAAACGATTTTGTTGAAAATTTTGAAGATAATATTTTACCACAAATAATTTGTGGGACATCTGCTGGT…	1500	818	0.0354627
PF3D7_0934500	PF3D7_0934500_e1s1	ATGGTAAACTTCATCTTGAATGAAGCCAAGGATAAAGCACATGAAATTGAAGCCAAAGCCTTAGAAGATTTTAATATTGAAAAATTAAGAATTGTGCAAAAGATGAAAGAAAAGATACGTGTAGAATTTCAGAAAAAAGCTAAACAAATGGAAATTAAAAGATCGATTGCTAGATCATCAGCTATAAATAAAGCTAGATTAAAGAAGATGTGTGCAAAAGATCAAGTTTTTAAAGAAATTTATAAAATTAGTAGTGATAAATTAAATGATTTATATAAAGATAAAGATAAATATAAAAACCTTATTGTAGATTTAATAGTTCAATCATTATTCTATATGCAAGAACCACATGTTATTGTTCGATGTAGAGATATAGACAAAGCAGTTGTTGAAAGCTCC…	663	823	0.0341967
PF3D7_1025300	PF3D7_1025300	ATGCTATTATATTTTGTGATATTCATATGGTCCTTTTTATTATGTGATATATATGAAACACTAAATATAAGAAAGAGCATAGATAGGAAATTAACACATTTGAATAATAATATTGAATGTGCATTGAATATAAGTAATTATCGAAATAAGAAAAGTAAAAATTTGCAATTTATTGGTAATAATAAGATTGTAAAAAAATGTAAGAACAAATATAGTAACAAAGTTCATTTATTTGGATTTAGTAGTAAAGAAGAAATAAATAATAAAGGAAAAAAGAGTTTAAATATCGAAAAATATGAATATAAAAATGGTAATATATTTTTATATACTAAATTATTTGTAAATAATGAAGAAAAGAAATTTATTATTGATTTATGTAGTGATCATAGTTTTATATTT…	2766	822.5	0.0340709
PF3D7_1401300	PF3D7_1401300-e1o2	ATGAGAAATATTAATGGGTTCTATTCTATTTCAATAAAAAAAAAAAACTTAAGTACATATGATAAACTAATTTTGGGAAAATCTTCCGAATGTTCCTGTGATAAGGATTTGGAAAAAAATAAGAAGTTTGTAAATAAGTTTTATGTGATGTGTTTAAGATATTGTTTAATTGGATTGATATGTATAGCAATAATATTG	198	759	0.0338841
PF3D7_0114000	PF3D7_0114000_e2s1	CATATATTTTTTTATAAGACCAACTCTTTTCATTTGTCTTTACGCGAACCAGTACCATATGCTAATCGTACATACAACAGGATTTTATATTCTACTGAGAAAAAGAAGGTTAACAGAAGGGAACAGATACGAACCCAAAGAGAACCACAAAAATCTAATTATAAAGCGTCTATGAAAAATTATCTAAAATGTGTAAAGAGTGCCCCATATATCGATGATGCAAAATATGGAGCCTTAATATCCGAAGAGGAAGAAAGAGAAATGAAGATGATAAAAAAGATGGAACTAGAAGAATTGGAAAAAAGAGATGAACTAATGGAAAAAAGAAGACTTAGAAGAATAGAGCGAATGAAGAAAAAGGAAGAAGAGAAGAGGATAAAAGAAGAAGAGGAAAGGATA…	2145	812	0.033717
PF3D7_0405300	PF3D7_0405300_e1o1-s3	TCTGTAGATATATACAACGTTGAACATATAGACGAAGCGGAGAAAAAACCAAATCTTGATAATCCAAAAAAGTTTGACTGGACACAGGTATTTAAAGACAAAGTAACAGAAAAGATAAAAAATGAAGAAAAATTCAACAACTCAAAAGAAAATATACAAAACGATATAAGAGATAAAGAAATTCATAAGGATGATAGAATCAAGGGAATTACTTCACGAGAAAAGAATGCTGAAGAAATAAATAATAATGAAAAAAAAGACAAGTTTGTGTATGAATTTTATACATCCAATAAGAAAGAAAATATAGATAAAGAAGAAGAAAATAATATAGATGATAAAAATATAAAAATAGAAATAGAACCTAATTATGAAATCAACAACAATTTTGAAGAAGAAAAT…	1500	758.5	0.0336741
PF3D7_1333300	PF3D7_1333300	ATGAAAAAAATACTTTGGTTGTGCCTTGTTATAATATTTGAAATAATTGGATATAATGGTTTAGAAATATATATAAAAATGAAAGGAAAGAAATTAAAATGTATAAAAGAAAGGATAAATAAAGATACATTAGTTATAAGTAAATTCAAAACAAATCATAAAAATGCTTTAGTATCATTATATATATATGATGTTGATGTTAATGAAAAGAATTTTCATACACAACCTAAATTACCTATATTTGAAACCGTTAATAAACATGATATAAAAACAGCCTTTACAACATTTTATTCATCATCTTATTCATTTTGTGCTTACAATAATTCGGACAAACTTATCGAAGTATATTTCGAAATTAAATATGGAACTGAAGCTAGAGATTATGCACAAGTAGCCAAG…	633	808.5	0.0331133
PF3D7_1447800	PF3D7_1447800_e1s2	AAAAGAATATATGATATTATATTAAAAAATAATAATGAAAGTAATACATATATGAACGGAAAGAAAAAAGAAGAAAACGAAATTGTTAAAGAGCTAGATGAAAATTGGTTAATTAAATTATTAATATATATGAACTCATTACTACAATTAGAAAGGTTAAGATTAGAAGATATGAAAATTAAACAAGAAAGAAATAATGGTATCAACAATTATATCAAAAATAAAAATATGAAAAAAAAAGAATTAATAATTGATGAAGAAGAAGAATTAGAAGAAGATATATCAAGCAACGAAATACATAGGCTAGAAAAAGAGATGGATACAAATGAAAAAATAAAAATGTTGAAAGAGAAAAATAGAAAGTTGTTATCCCTAAATGAATTTTATAAAAAGAAATTA…	3003	812.5	0.0319491
PF3D7_1036400	PF3D7_1036400_e2s1	AAAGACTTGCTGAGACTTGCTAAAGAAAAGTTGCAAGAACAACAAAGCGATCTAGAACAAGAGAGACGTGCTAAAGAAAAGTTGCAAGAACAACAAAGCGATTTAGAACAAGAGAGACGTGCTAAAGAAAAGTTGCAAGAACAACAAAGCGATTTAGAACAAGAGAGACTTGCTAAAGAAAAGTTGCAAGAACAACAAAGCGATTTAGAACAAGAGAGACGTGCTAAAGAAAAGTTGCAAGAACAACAAAGCGATTTAGAACAAGAGAGACGTGCTAAAGAAAAGTTGCAAGAACAACAAAGCGATTTAGAACAAGAGAGACTTGCTAAAGAAAAGTTACAAGAGCAGCAAAGCGATTTAGAACAAGAGAGACGTGCTAAAGAAAAGTTGCAAGAACAA…	1578	821.5	0.0312363
PF3D7_1326500	PF3D7_1326500_e1o1-s5	AATATTTACAAAGATACATATAATAATATCCCTTCATCAAATAATTATAATGGATACTTAGGAGAACATAATCATGATATAACAAGTGACACAAATAATAGCCCTGAAATTTATAGTGATAATACTTCAACAAAATTATATAATCTTAAAAAAGATTTACAAAACACATTTAAGGCTTCTATTTCATATTACAATAATAAAAGTAAACATAACAATATAAATAATGATACAGATCATAAGGAAAATTTTCTTCCTTCAGAAATTTATAATAATATTGTTAAAAATAGAAATATTAAAAATATAATATCTAATTATAAAGAAAATCAAATAATAGACGAAACAAATTTAAGAAATAATAATTCTTATGAAGAAAAAAAAAAACAAAAACAAAAACAAAAA…	528	820	0.0309565
PF3D7_0501000	PF3D7_0501000_e1s1	ATGATGAATAAAAAATCAATGCAAACTAAGAACTTTTTATCTGAAAGGAACTATGGAAGTATAGATCAAAATGTGAGGACTAAAAATAAAAGAAGATTAATGAAATTCCAAAGTAAGAGTAAAGCAAAATCGTTCCTTTTTTTATTGGAACTTATGGTATTCTCCCTTTTCATATGGATTTTAAAGAGTGCAAAGCAT	198	821	0.0307918
PF3D7_1351000	PF3D7_1351000_e1o4-s1	ATGAAAATTGTCGAATTTCGGCTTGCTATGCCTTTAACCATAGAAGAATATAAAGTATGTCAATTATATTTTGTAGCTAAAGCTTCATTAGAAGACGCAGAAAATAATATAAATAGTAATTGTGAAAAAGGTGATGAGAATAATGATTCAAAAAAAGGAATAGTAATATTAAAAAATGAAAGTTATATAAATGAGGATGGTACATGTGGTCAGTATACATATAAGAGAATAAATTTAATAAATAAGTTACCAAAGTGGCTATTAAATTTTATAGATCCTAAATATTGTATTATAGATGAAAAGTCATGGAATGCATATCCATATTTAAAAACAGTTTATGAGTCTAGTGGTTTTCCAAAAGCGAAGATTCAAGTTGAATCCGCACATTTTAATGGTTAT…	1500	758	0.0303545
PF3D7_1319900	PF3D7_1319900_s1	ATGAATATTCCTCTTATCATTACGATACTGTTATTTTTATTCTACCAACATTATGTATGTAGTACAATAAAACCATACGAAATAGATAAAAGGGATTTATTAAAAATATATGAAGATTATAAAAATTTGGAATTAAGTAAAGAGGTTGTTTTAGATAATGAAGAGAGTTTCCATAATATAAAATATCTGTCTCTATGTAATATAAATAATAAGAATTCGATATCCGGAATATCAAATATACTTTGTAAAAATATTAATTTTGGTTATCATATAAAAATAAAAGGTGTAGATCTTTTATATGGTGAGATAGTTCATTTTGGTACATCGAAATTTATAAAGGAAATAAATTTTATATGTAAATATTATATATATGATAATTCGTATGAAATAATAAAATGT…	2259	809.5	0.0299155
PF3D7_0508200	PF3D7_0508200-e1o4	ATGAAATTAGACACAGTGTTTAAAATATTACTTCTTGTAGTTATTGTTTTTACTATATGTCAAATAAGAACATTAAATGAATTAATGAATATTTTAAGAGATGGAGATTTCATAATATTAATAAAAAATATATTATACAATTTAATTATTAATAGTAATTATTTTGACATAAAAAATAAATGGTTATCATTTTATCGAACAAAATATTTAATTCCTCAAGTATCTTATTTCATTTTTTTTCTTATAAGTGGATGTATCACATATGTACTTAAATATATTTTAAATAAAATATCTAACTCTCTTGGGGAAAAACTCATACCTACC	324	809.5	0.0299155
PF3D7_1409400	PF3D7_1409400-e4o4	TCCATGTCATGCTTAAATTTATGGCCACACTCCAAACATGTAAGTTTGTTTAGATCATTCTGGGTTATTTTATGCAGTAGTTTTATTTTGACTGTTGCAGTAGTTGGGTTTTTAATAGCTTTAAGAAAATCCTTAAGATTGGAGAAATTAAAAAAAACGATAAAATTAGTTTCGAAAGGAGCTTATATTGATTGCTATAGAAAATACAGTGTAGCCGATCCTGATCACGGAATGCAATTTGAAGAATTCAACAGAATGTGCTCAGATCATACAAATGGATATATTTATTTTGACTTTTTAGATTTATTTATTATTTTTAATGCTTTGGATGAACATCAAAAATGTTCTATTAATGAAAGAGAATTTTTAGAATGGATCAATGGACCAGTCACATATTTA	399	809.5	0.0297922
PF3D7_0212400	PF3D7_0212400_e1o3-s4	GTAGAAATTTATTCCTCATCATCTTCTTCGACGTCTTCGAATTCTTCTTTTGTTTTTAATGTATCCAAGTTTTATATGATGAAGATGTGTATATCTATTATTAATAATATGATTGGTGTTGTGAAATATATAAACTTGGAGAGAGTTAAGCAAGTTTTTTATGAGCATAATATTATGATGGATGTCCATATGAAAAGTCATCTTCATCACGATATTGATGTGTACTATGGTCATGATAATTCTTATAACAACATTTATCAAAAAATTATAAAAAGTTACAGAGGAGAAGAAAAAGACACCTTAGATGTTATAAACACCGAATCAGTTCACCAAAATAGGAATGAAGATGATATAGATGGTTCTATAAATAGTTTAGATGTATTTAACGAAATTATGAGA…	1500	756.5	0.0294678
PF3D7_1122100	PF3D7_1122100-e1o3	ATGAAACGTATTATTTATATTTATTTAAGTATAATATATATTCTTTCATTTGTAAATTCTTATTTAATTGATGAAAGTATCAATTTATTACCCTTAGAAAATGATTTAGTACACGTAAAACTAAAGCTAACTGTAAACGGAAAAGATTATAAAGAATTTGTACCTATAAATATCTTGAAAATATTAAATTATGTGAATTCACTTAAAATTAATATTAAAAGGGGTGTTTACCGAGAATATTATAATAATAAATATTTGGACTCATATCCTTATGGTTTTACTTTTGTAGTGGATTTAAAAAAAGAAGAAAGAGATAAATATGATTTTTCGAAAGAAAAAGAATATAATGAATTTTCAAAGAATGAAATGTTTCTTTTAAAAACTTTATTGAATGACATT…	1260	808.5	0.0290901
PF3D7_0109100	PF3D7_0109100_e1s1	ATGTTAAAGATAACATGTGTTGGCCTTTTTTTTTACATCATTAAAAGTCTCTTTGTAAATACAAAAGCTCCTGAAACGTCTCTTGAAAAAATAACAGAGTTTAGGCAACAACATAGAAAAACATTAGATGGAAGATTATGTGCTGCAGCATTTCTTCATGATGATCAGACTTATACAAATTGTACTACTTCTCTATCCCCTGACGGAACAAGCGGA	216	819.5	0.0288877
PF3D7_1013300	PF3D7_1013300	ATGAAAATATATAGGAAAAAGAGTACTTTTTTATTAATTTTTGAAATATTTATATTTTTTTGTTACATTCTTCAAAATGAATTTGTTAAAGGTTCTTATGAAAGCAAAGGATATCCCTTAATTCATCTAATGAATAATAATGAGTATACAGGTTCTGCAAATAATTTTATTAAGAATAATTTGATAAATTTATTATATATATATAAAGATGTAAAATTTGATGAGGAGAAGACATTAGGAATAGATTCTTTTTTAGATATCGAGGATGATACAAAAATTGAAAGATTAATTAAAGAAAAGATGTTATACATTAATAAATATATAAACAGTCGTCAGATGATAAAATATTCAGGATTTATATATTTATATGAAATAATTGAAAAAAAGAATTTTTATTTT…	1884	805	0.0285548
PF3D7_0607400	PF3D7_0607400-S2_C	ATGCTCGAGTCTGGCATCTTCATCGTAATCTGCACCTCGTTTAACTGGAGCTACTTTGGCTTTGATATTTACACTTCGAAGCTGATCCTCGTGTGCTCATACGTGATCGGTTCCACATACATGTATATCTGGGACCTGTACTGCGACTGGGGTCTGTTAAAGGAGTACAACCACCTGCTCCGTAAGAACAACAACATCATGTATCCGCCCCACTACTACTATTTTGCGGGTTTACTGAACCTGATTTTCCGCCTGACCTGGGCGATCACAATCATGCCGATTAACATTTTCGAGAACAAAGAGATCAATAGTTTCCTTATTACTTTCTTCCTCATGTTTATCGAGGTACTCCGCCGCAGCATCTGGATGTGTTTCCGCTTAGAGAACGAGCACGTCACA…	533	820	0.0285205
PF3D7_0211200	PF3D7_0211200	ATGGAAAAGAAAAGTAGTTATAAAACAGTTTTATTAGGAGAATCATCAGTAGGAAAATCAAGTATAGTTTTACGATTAACAAAAGATACTTTTCATGAGAATACTAACACAACAATAGGTGCATCTTTTTGTACATATGTAGTAAATTTAAATGATATAAATATAAAGAATAATAGTAATAATGAAAAAAATAATAATATAAATTCAATAAATGATGATAATAATGTTATTATAACAAATCAACATAATAATTATAATGAAAACTTATGTAATATAAAATTTGATATATGGGATACAGCTGGACAAGAAAGATATGCAAGTATTGTCCCACTATATTATAGAGGTGCTACTTGTGCTATAGTAGTTTTTGATATTAGCAATTCAAATACTTTAGATCGA…	705	802	0.028464
PF3D7_0526900	PF3D7_0526900-e3o4	AAGATATCATATTTATCTACTAAGGATGGGTTATATCATATTTGTATTTCATGTCCTTCAACCAACTGGTTTAAAAGTACAGCAATAAAATGGAGCTTGTCAATTGAAGTTGGAGGTTCGGATATTGATCCTGAAAATTTGGCAAAAAAATCAGAACTGAGTGAAACCTTAACAATATTAAATAATTTGAAGAAAAAATTTAATTCGATGAAATTGCAGCAAATATATCAGAAACAGATG	240	756	0.0282832
PF3D7_1104100	PF3D7_1104100-e4o4	GTGAAATTGATGTTACAAAGGTTATCTAATTCCTATTTAGAAGCTGTGAATAATTTTCAAAATGCTTCAAAGAATTATATTAATAAAACCATAATGAATGATTTATCAACTAAAAATTATAATGTAGAAGAGAATATGGAATATGATTCTTTAAATAATTTTTCTCGTAAGAGCAATTCTAATTATGATACAAATATAGATAAATATAATGTGAATATATATGATTATAATTTTTATGAAAATAATTATGAAACGTCTTATAGTAAATATAATAATAGTACGGAATTCCAGAGTGTTGATAGTACTATAGAAGAAAAAACATATAAAAAGAAAAAAAAATATAAAAGTAATATATTTACTGGTGATAAGAAAAATGAAGTAAATGAATATCTTTTAGAA…	762	809	0.0280096
PF3D7_1241200	PF3D7_1241200_e3o3-s5	GTTATTAAATCTTTGGATAAAGAAATTTTAGATACTATACACAATTCAAACAAAATAGATCTTATATATGATAGTTTGTTTTATATTATTATAAGTCACTTTATTTATTTCTTTTTAAATATGAACATTGAACTTGATGAGGAAGCATCCAATATTTTATCATGTAATTATAATAAAGGTGCCTTCCCAAATAAATTTGAAAAAAATGACAATTATATTAAAATTACGAATGACACATCTGAGGAAAAAGAAAGTGGAAATGTACAAGAGGATGAAGAGCAACTTTCTTGTAGAAATATTAATTCTTTTGAAAAAAGTATTGATGACGAAGGAGATAAAAATAATAAGAATAAAGCAAAAGGTAAATTCTTATGTATCGACGATGAGTTCAATTTTGAA…	948	812	0.027858
PF3D7_0310300	PF3D7_0310300_e1s2	CATAGTTCCTTTATAGTTCATATGTTAGCTTTATTAGATTATTTAGATTTGGATTTCCGAGGATTAAATAATTGTGATATTAGAAAAATAAGTATTCCATTGAGTCATTCTTTTTTATTTTATAATAATATAACGAATTTACAAATAGCACGTCCATTATCAATAAATAATATTCCTATAAGTTACATGAATAAAAATAAAGCATTAAAAAAGGCTTATAAAGATAAATATATATATACAATAAATAGTTATACAGAATTAGATGACCTCATATGTTCACAACCATGTACCGTAATAATATATCAATATGATATGCTTATAAAGAATGAAAAGAATAAAAAATATTTAGACAGTGTACAAAAGTTTATTGATAACAGTAATAATTATTATAGTAACTCG…	1743	808.5	0.0272134
PF3D7_1338900	PF3D7_1338900	ATGAAATTGTCCTCTTGCATAACATATGTTTCAATATTGTGTAATTTAATAATAGTTGGTCGTTTTTTGTATTCTTCATTTTTGTTTTTGTTTAGTGAAAATATTTTAAATTATTTTGAAAGGAATAATCCTTTTATTCATAGGAAAAAATATCTTATTCATAAAAGGACCCAACCAATTTTGCATTCTTCAAAATATAGACATCCATATGAAGGTTCATTCAAAAAGAAGGTAATTTATGACAATAATTATTTTGGAATAAGAAAAGAAATAAACTTGGTTCATTATAATAAATTCTCTTTTTATGAATATTTATTTTTGCTTCTTTTTTACAAAAAGGGTATTCACAAAATTTTTGATTATGTTTATGTATATTATTATAAAACAAATATATTTGAT…	2793	755	0.0269872
PF3D7_1304300	PF3D7_1304300	ATGAGGAAATATCGCAACTCCATTTTTACTATATTACTAAGCACATCCCTTGGATGGAATATAAATAAACTTTATCGCCAAAATAATTTAGATATGTACGGATTAAAAAATGATCATGATATTATTGTAGTTAGACATATTAACATTTATGATAAAAAAGAAAATGAAAATAATAAAAATAATATTTTAAATGAAAATAATAAAAATAATATTTTAAATGAAAATAATAAAAATAATATTTTAAATGAAAATAATAAAAATAATATTTTAAATGAAAGTAATAAAAATAATATTTTAAATGAAAAAGAGCTACTTAATTTTTTAGATCGGTTTACTACTATTAATAAAAAATATAAAGGCTTCTGTGAAACTAGCGTTTTTAAAAATTCCTCTTTTTCA…	639	755	0.0269746
PF3D7_1353600	PF3D7_1353600-e3o3	TTGAGTTTGTTAACCTGTAAAACTTACAACTTGTATAACATTTTATGGTCCTTTTCCATATGGTTAGAAAGTGTGGCTATATTACCTCAACTAGTATTACTGGAAAAACAAAGAGAAGTTGAAAATATTACTTCCCATTATGTTATTACCATGGGATTATATAGAGCCTTTTATATATTAAATTGGATATATAGATATTTCTTTGATGACAAACCATATATTAATGTAGTAGGATGGATTGGTGGCTTAATACAAACATTATTATATATAGATTTCTTTTATTATTTTGCCTTAGCAAAATGGTATGGAAAAAAATTAGTTCTTCCATTTAATGGTGAAGTA	342	805	0.0261485
PF3D7_1342100	PF3D7_1342100_e1s1	ATGCATTTTCGAAGGTGTATACGAAAATATTGTATAAATAAAAAAATTGTTAACCCCTTTGAACATGTACAGAGAACTTTAAATGAGAAGAACTATTATTATTATGATATTAACGAACTGCATGATAGCAGAATTAAGAGTTTACCATATTCGATAAGGGTTTTACTAGAATCTGCTGTTCGAAATTGTGACAATTTAAAAGTCAGTGAAAAGAATGTAGAAACTATATTAGGATGGAAAGAAAATTGTAAGAAGAAAAAGGAAGTTCCTTTTATGCCTACGAGAGTATTATTACAAGATTTAACGGGTGTCCCATGTATTGTTGATTTAGCTACCATGAGAGACACAGCCGAAAAATTAGGATGTGATGCAGAACGAATTAATCCTTTAATCCCTGTA…	2727	801	0.0260338
PF3D7_0831000	PF3D7_0831000-e1o2	ATGGAAAAATATATACATACCAGTAAGTCAAATTCTGTTCCATCAAAAGGATATGTTAATAGATATATTGAGAATACTAGAAATGATTGTACATTATATAAATGTGCCAAAAAAGGACAATATAGAAATAGGAAAAATATTCTTTTGAAATGTGGTAGATTTTTTAGATTACCATTATGTGTTGTAATATATTATATCATTTTAATG	207	802	0.0256994
PF3D7_1303000	PF3D7_1303000-e3o3	CTTTATTGGTCCCATCGTTATGAAAAGTTAAACAAAGAAGAAATTTTATCTGACCGATTTACATGGTTATATGAAAGAATGCTAGAAGATGAAGTTCATAAGACCTTATTAGATAATTTATCGTCATACAATTTTAAAAATAATGGCCCAGAAAATATGTTAGGCCCAAGCATAATA	177	807.5	0.0256471
PF3D7_0930200	PF3D7_0930200-S1_C	ATGCTCGAGATGTCCAATGAGAAGGGTGACATCAAGGAGCAAAACGACGAGGAGAAGCTGAACATCGAGTCCGTCCACAACGACAAGAAGGAGAACACCTTATTCAACGACATCATCCCGCAGTACGACTACAAGCGTATCCGCACCAACATCATCAACGAGGAGATTCTGATCGAGGGTATCAACAAGTCCTGCAACTTGAAGCGCGAGGACATCATCAAGGACTTCTACTATGCAAAGGTGCTGAGTCTGGAGAACCGCGACATCGTATTGATCCAGAACATGAACTTATTCAAGAACCTTGAAGAGCTGCACCTGAACAACAACTTCATTGAGGACTTAGAGAACCTGGAAGAGCTGATCAACTTGAAGATTTTGTCAGCCAGCAACAACAAGATT…	1583	754.5	0.0254981
PF3D7_1452800	PF3D7_1452800-e4o4	AACAATGATATTAAAGATGTTAAGGAACATATTACTAATTTTAAGGAATATGTAGAAAAACGAATAAAAGACATAAACAATATAATGGATATGAACAGGAAAGAAATTGATGAAAAAATTGAGCATATATGTATGAATCAGAAAAAACTCATGGGGGATTTTTATCCCTATAAAAAAAAT	180	754	0.0249608
PF3D7_0317100	PF3D7_0317100_e1	ATGAATAGGGGATGGCACGTGGTGTTTTATTTTATCCTCCTTCTAATGAATAAATCATTAGGTGGAGAAGAGAAGCTTACCAAATTTGATCCTGTTATGATAAAAGAAGGAGAATTATTTGGGGAAGTGTCTTATGATTGTGAGTATAGTGGATTTCTAGAAATTGAGAATGATGACATTTTATATTATTGTTTTTTTGTAGGAGAAGATGATCATAATGGTTTATTATTAAGGAAGTTCCACATGGATGATATGGTATGGGGTATACCCATGGAAGTATTAATAACACGTAAGAAAATAAATTTATATATATTAACGGTTGATTATATATTATCTAAATTAATATTAATATATAGTTTTGATGAAAAAATAAGAATAACTGTATTTAATAATTATATG…	1152	817	0.0249293
PF3D7_1015000	PF3D7_1015000	ATGGATAGCAAAGACAATGATGTATGGAATGATTATTCAAATTCATTGATGTTATATGAAAGGATAGAAAATTTATATAATGATCATTTGATTGAAAAAAGTAAATTAAATGAACAGAATAAAGAGTTAATTAATAACAATATGACCCATGTTCAGAGGGAAACAAAAAATGTTATTAGAAATAAGGATATGATTAAGGCAAATATGTATAATTATGATATAATAAATTATTATAATGATGAATTTATATTAAAAAAAAAAGTGATGGAATTATCGGAAGATATAATGATGGGTATAGATTATATTTATGATATTTTCCGTTTATGTAAAGAGAGCAATGTCTTTTTATCATTTAATGGTGGAAAGGATGCTGTTGTTATTTTACATTTATTTCGGTGT…	984	803	0.0244587
PF3D7_0401800	PF3D7_0401800_e2s1	AATTCCAATTTTTCTAATGGAGGAGATATTTTGTTGAATAGAAATTTGTCAGAGGAAAAAGCAGAGGATGATTATAAAAAATCTTCTAGCTGCTCCTCCTTAGCATCAACAACAAAACGATCACCATCAACAGCATCAACATCAACATCATTAAGATCAGCATCAACAGCATCAACAGCATCAACATTAAGATCAGCATCAACCGCATCAACAGCATCAACAGCATCAACAGCATCAACAGCATCAACAGCATCAACAGCATCAACAGCATCAACAGCATCAGCAGCTTCAACAACACGATCAGCATCAGCAGCTTCAACAACACGATCAGCATCAGCAGCTTCAACAACACGATCAGCATCAGCAGCTTCAACAACACGATCAGCATCAACAGCTTCA…	1584	801.5	0.0231949
PF3D7_1216300	PF3D7_1216300	ATGGTTAAAGAACAAGGGTTAAATATCACCAATGTTTATAATAGAGATATTTATAATAATGCTGAAAATAATACAATTGATGAAAGTAAAGATTATTCAAGATGGAAAATAATATATCCAAATTATCTTAATAAAAAAAAAAAAGTAAATGAAGGAAGACGAATTAATTTAAAATATTGTGTAAGCGATCCAACCGTTGATGAAATTGCACTTGCTTGTAAAGAATTAAATGTTTCTTATGTTATAGAGAAAAAGAAATATTATCCAAGGGATTGGTTAATAGAAGGAAGAATAAGGATCAAATTACCAAATCAAAATAACGATATTCTAAATAAATTTGAATTAATGAAAAAAATTGGGTTGAAATTACAAACTATAAAGGTAAATGTGGAATCAAAT…	456	753.5	0.0231469
PF3D7_0826100	PF3D7_0826100_s7	ACGGGTCAAATAAATTCGACACAAATAAAAGAAACAAACAATAAAATTAATAATAATAATAATAATAATAATAATAACAATAATAACAATAATAACAATAATAACAATGGTAATAACACAAGTGTTGATAATAAAGATTCTAAAAAAACAGATAAATCAAATAATACAAATGACGCTGAACAAGTAGCATTACAATTAAATAATAACAATACTGAAGGCGTAGAAGAATTTAATAATATAACCAGTCTTAATATAGAAAATTTAATGGATCAACTGTATTCAACTTTATTAAGTACAGATATAAGAACAAATGATCTTTTAAACAATGAAATTATATCATTGCAAAATATAGCTAACCGTGTACAAAGAAATAATGATTTTAATAATATTGTAGATGAG…	2913	805.5	0.0227511
PF3D7_1326000	PF3D7_1326000-e2o4	GTAGGAAATTTGCATAAAATTAATACGAATGCACAGAATGATGTTATCGAGAATATAAATGTAAAACAAGAGAGTGACGTTTCATATATAGGAGAAAATATAGACGCGGGAAATATAGATTATAAATACTGTCCATATTTAAAACCATTAGAAATTAAAGGTATTAAAAGAGCTGATAGAAAGCTTGATTATAATAGTAGTTATAGCTTTATGAATAAACAAAAAGATTTTACAGAAAATTTTAAAACAAGCTTATTTACAAAATGCTTATATAATGGAATGAAAATCCCTTTACCACCAAAGAGATATAAAATATCGCAATAT	324	815	0.0221858
PF3D7_0417300	PF3D7_0417300-e1o4	ATGATACTTCAAGAGGTTAATAAAAAAAATTATTTTTATTGTATTAATAAATATTATGGGTGTGTGAAACGTACCTTTTATAGTTATAAGAATATAAAATTTTATAAAAAAAATAATTTATATATAAACGAATATGAAAAAAATAAAACTATAAGTTACAAGGACATTAGTATAGGTATATCTAGAGAATATTTTAATAATAAAAGATATTATAATAAATTAATAATAAATAACAAACACAAAGTTGATGATAATGTATTTATTACTCCTACGGTTTTGTCAAAACATTTAAAAAGCAAATATTTTTCGACAAGTCATGAAACCCTTAAAGGAGTTAATAATATATCAACCAATTGTGAAAATATAAAAAAAAAAAAAAAAAATGAACAACAAAAAAAT…	2196	806	0.0219396
PF3D7_0515600	PF3D7_0515600_e6s1	CAACATACAAAAAAGAATTTGCTATTGCTGATAAAATCCTTTGCTTATAAAGGAATAAAATTAGAAAACATATCTGGGGAATATTGTAAGAAATATAATGCATTGCTAAATTTGGGACAAGCTGGATTTACAAATATATATGATTTGTTGAAAAGTATAGATAGTTATTTGATATTTGAAGAGATAAAGGATGATAATAAAAAGGATCATGATGATGAAAGGAGTTTAAGGAAGGACCATAATAATGATGATGAAAGGAGTTTAAGGAAGGACCATAATAATGATGATGAAAAGGGTGATAAGAAGGACCATGATAATGATGATGAAAAGGGTAACAGAAAAGACAATAATAATGAGGAAGAAAAGGGTGATAAGAAGGACCATAATAATGATGATGAT…	1521	800.5	0.0218004
PF3D7_1328000	PF3D7_1328000_e1o1-s2	GATAAAAGAAATAACCAAAAAAGGAATTTAAAGTCTGGATTAAAGAACAAAACAATTGGTTTATTTCATTCTAAAGAAGTAGGTTCCTTTAAAAAAAAAAATGAATATATTATTAATAGTGATAATATAGTTAATAATAATGTATCATTTCATAAAGATAAACATGATCCAGCATTAAATAGTAAAATAAATAATTCCTGTTACCATCCAAATAATTATCATCATATTAAAAGGATTAGTATTAATAGCAACATAAATATGTATCAAAAAGAAAAAAATATAAATAATACATGTATTCCTAAAAATAGAATAAACGAAATATGTATAAAAAAAAATTTTAATAATAATTATAAAAATATTCATTGGGATAATTCTAAATATAATCATATAAATAATACT…	1500	816	0.0216861
PF3D7_0720400	PF3D7_0720400_e2s1	GATGAGATGGTAAATATTTGTCACTGGAATGTTGCCATACAACAAGGAAGAATAGCTGCACACAATATGTTAAGAGACGACAAAAAGGAATTTAACTTTATACCCTTTTTTAATACAAACATTTTTGGAAAAAATTTCCGATATAGTGGATATGTGAAGAACTATGATAAAATAATATATGAAGGAGATTTACTTAAACATAATTTTATTGGATACTTTGTTAAAAATGATAAGGTTGCATCAATTATAACATTAGGAAATAACAAAATGGCATCTTTAAATGAATGTATGGCAAAAAATAAAGTTCCTAAAGTTTACGAATTAGAAGGAGGCTTAAAAAATAGTGACAGTATGATAGCTTCACTAAAAATA	372	753.5	0.0208315
PF3D7_1407800	PF3D7_1407800_e1s1	ATGGCTCTTACCGTTAAAGAAGAAGAATTTTCGAATACATTGATTAAAAATGCTTCAGCATTTGATCGATTGAAATTAGGTAATTTGAAGAACTTGAAAATCCAGAAAAAGCTTCAGTTTTTATATTTAATATTGTTTGTCCTTATTACGGGTGTGTTTTTCTTTTTTTTGATTGGAAATTTTTATTCACATCGCAAGTTGTATCAAGTTATTAAAAACACAAAACACACAACTATAGGATTTAAAATTGATAGACCACATGATAAGGTTTTGAGCTCTGTATTGAAAAATAAATTAAGCACATATGTAAAAGAGAGCTTCAAATTTTTTAAATCAGGTTATGCACAAAAAGGATATTTAGGAAGTGAAAATGACAGTATTGAATTAGATGATGTTGCT…	1347	800.5	0.0207933
PF3D7_1121800	PF3D7_1121800_s1	ATGAAACATACAAAAATAACCAAATATTTGACAATTAATTTTTTTATCCTACTAACTTTAGTTTTTCAAAAATATTCAAGTTGTCAAAATTCGTTGAATTATAGTAAAAATAACTATGGATTAAATGACCAAGAGCTCCGAGCAATGCTATTTGGTCTTAATTATGATCCATCTAAAAGGAATAAAAATAATAAAGTAAATAGAGATGTTATAAAAAATGAATCATCATTATTATTACGTAATCTTATCAATGAAGAAACTCTAAGTGAAAAAAATGACAAAGTTGTAAATGATATTAAAAATATGAATAATAGCACAGAGAAAAAAATAAATAGTATATCAAAAGGAAATAATAATATACATAATATAAATGAAAATCAAAATGCAAATGTTGAATTA…	2064	805	0.0202312
PF3D7_1136900	PF3D7_1136900_e1s1	ATGCTGAATATTATTTATGTGGTTTCCTTGATATTAATAAAATTTATCTTTTATAAGGAATGTAATAATAATAATAATTATTATTTAAGTAATATAGAATTATATAATTATAAACTAAGGAAGAGAAACAGGATTCTAAATAATAATATAAATGATAGGAAATCCTTTTTGTCTGATTTAGAACAAAATTACAAACCATTATTTGACATATATGAGTTATCAGCTAATTTTGAGAAAAGAAGAAAAGAGTTAGAGAAAAAAACAAAGGGAGAAGAAAATGAAATAGAAAAAAAAAAAGAAAATGATTTAGAAAAAAAAAAAGAAAATGAAATAGAAAAAAAAAAAGAAAATGATTTAGAAAAAGAATATAATGATGTCATAAATTTATTAGAATTAAGT…	2742	752.5	0.0200832
PF3D7_0310200	PF3D7_0310200_e1s4	AAAACAAAGAAGGATTATAATAATATAGATTATTTTTTTAAGGATTTATATCACAAAATACATGAGATTAATTTAAATGAGGGTTCCTATAAAATATTAAAAGATATATATTTTAGTATGTTGTATAATATGAATAATATGAAGAATTGTGGTATTCAGTACTTAAACAGGATGAATAGACATAGTTATAATAAGAAGGTGAGTAAAGGAAGTATTAGTTCGAATATAAATAATAATATAAATAATAATATAAATAATATAAATAATAATAATATGAACAATAATATGAACAATAATTTGATTAATTATCAACATAATTATAATAGTAATAATTTTCAGTATAACGAAGAAATAAATTATATAAAATTTAATGAAACTATATTAAATAAAAATACTTTA…	2775	805	0.0199634
PF3D7_0727800	PF3D7_0727800_e1o1-s1	ATGAGAAGTAAATATAATATTCTAATTTATAAGAAAAAAAAGAAGCACCTAAGATTGGATGTATTGCTCTTTTTTGTTTATCTTATATTTTTGAATTTAATTTTACAAAATAAGAAATTTGAAGCTCAACCAAAAGATTATGAATATATTGAAATTTTGAAAAATAAAAATGTGAATGAGGAAACATTTGTTCATGTAAAAAGATTTGAACCGACTTCTTCTGATTTGGGCAATATAGGAAAAGAGAAAATTTTAGAACAAAATAATTATAATGTTAAAAGTATTAATAATGTTGAACTTAGAAATGATAATATGAATGTAATTAATAATGAAGGGGTATATAATAAATATGTAAAAGAGAATGAAGAGATTATTGGTGATAATGAGAAAAAAGAAAAA…	1500	806.5	0.0196611
PF3D7_0935900	PF3D7_0935900_e2s1	TTATTAAATTCTATAAAGGAGAATGCCAACTCGAAACTTCCTGCTTTATTATGGAATAAAATAATAGGGAAGGGAAATGATAATGAAGTAAATTTTGAAGATAAGAAAATGATAGAAGGTAACAAATCTGGTAATGGAGAAGAGCACAATAAACATAAAAGAAGACAAGTAGACAATCAAGAAGATGATTATGATGTTGATGAATATGGAAATCCAAAATCGGGTGCTCCATACAAGAGCGAAGAAGAACATGCAGAACAACAAAATTATTATGGAGAACATCACGGAGATTATGAAGACAAAAACGAATATCATGGAAAATCCAATATAGAAAATAATAAAGATTTTCCAGAACAGGGACAAAAAGACGAAGAAAAAGAAAAAGAAGCAAAAAAAAAA…	1950	797.5	0.0195577
PF3D7_0603600	PF3D7_0603600_e2o3-s3	GAAAAAGTTGTTGAAAATATTTATATGAATATGTTCATATGTATTGATATATTAAATAACGAGTTTGATAAAAATATTTCTCTAAAATATGTATTTTTTCCTATCTGCTTTTTTGGATATGAAAAGAAGCTGAAAGTTGTTGTACATATGAATGAGAAAAATAAGGTCTTCGTAAAATCCAAATATTTAACTAGGGAGAGCACTAAATTGGATACTTCAAAGATTAAAAATGAAAGGAGACATAAAAAAGTAAGTGATGATAAAAATGAGTATTTGATTTGTATGGAAGAGAAACATAGTTCACATGATAAAGACACTAATCGTTTATGTACAAGTACTAATAAAACAAAGGACCTCTTATTAAAAGACGACGTTTTTAAAGAGAATGAAAAAAACGAT…	1500	813.5	0.0194826
PF3D7_0930500	PF3D7_0930500_e1o2-s3	AGTTTAGGTTGGGGTAGTGAATATAATAATGATATATTTTTTTATTTAAATAAATTAAAACATTGTAAAAATGAATTAGTAGATGTATGGAATATGAAAGGATATGATTCAAATAATAATTTAATTTTAAATAATAGTTTTATCAATTATTTCGATATAGGAATTATAGCTAGGTTAGCTTTACATTTTGATAATATTAGGAAAAAATATCCACACTTTTTCAATAGTAGAATAGGAAATAAAATATTATATGGTGAAGTAGGGTTTAGAGATTTTTGTTTTAATACATATAAATATAAATTAAATAAAAATATAAAAATTTATTGTGATGGAAAAAAAGTAAATATAGAAGAAAATCTAGAAAGTGTTTGTATAATAAATATACCTTACTTCTTAGGA…	1134	806.5	0.0194225
PF3D7_1226100	PF3D7_1226100	ATGTTGAAGCATAAGTACAATGACTCTTGCGTCCAAGAACTGTTCTACAAGAACAACATCAAACTGATCGCCATTGATATTGACGGCACCCTGGCGGACGACACCGGAAAGATTTCCGACGAAAACCTGAAGGCGATCGAAGTATGCAAGAAGGGCGGCATTGAGATCATCCTTGCATCGGGGCGCCTTCACTCGTACGCGATGAAGATGTTCACGAACGAGCAGATCGAGAAGTACAAGATTGAGAAGTTGGACGGCGTGTACTCGCACGGCGCGTACATCCACATGAAGGGATACGACTACGTGTATCGTAAGTTCTCGTACAAGGACCTGGAGTTGATCCTGTTCTCACTGGGCTCGTACAACATTCTGCGTAACGCCGTTTTCCTGACGGTGGAC…	948	812.5	0.0191319
PF3D7_1474600	PF3D7_1474600_C	ATGCTCGAGATGGACAGCTACGAGGCCAAGAAGAAAGAACTCTACCTGCGCCGTAAGGATATTAACCTCTACTATCACCCGATCAAGACGATCAAGCTTTTCTGTCTGCAGTTACGTAACATTATCGTCCAGACCTACCAAAAGAATAAGAAGTATAACAAGATTCTGATTCTGGCGTTGCTGATCATTCTGATCCTCTTCAAGATCCGCTACAAGTACGAGCATCTCAACAACTTCATCATCTACATCGAGGTCACCGTTTGGTGGCTGTCATTGGGTATTCTGAGCTCGATCGGCCTGGGTTGCGGCATGCACAGTGGGGTCTTATTCCTGTTTCCACACATTTACAGCATTTGCAGCACCTCGGAATACTGCAACAGCCTGAACTTCGACAGCCGT…	1265	813	0.0187892
PF3D7_1020600	PF3D7_1020600_e3o3-s5	ATGACAAATAGTAATAATATTAAAAAGGTGTCCATTATTAATATAGGAAAACTCACACTCTATCATATTTTAAAAAATATAAATCAAAATAATAAAATCCTATGGTTATGTGGATCTCTTGAAAAAAATATAAAAGAAAATTATAAAAATAGTATACATATATTTCAATATATTTATAATATACAACACGATAAAAAAAATTTTCATTCTACCTTATATTGTAACATAATACATGTTAATAATTTTATAATCTTAAACAAACAAATTTATTGGTTATATTACAGTCAACTAAGTAAAAATATTTATATACCTTTTATATATAAAACATATAAAATCTTATTACAAATTTTTGATAGAAAATGTTCACAAAGGGACATCTTATCTTACATAATA	393	756	0.018741
PF3D7_0306500	PF3D7_0306500_e1s1	ATGAGAGTAACATGGACAAACAGTAACATGATATGGAGGACCTTTAGTAAGATGAATGGTGAACAGGAGATGACAAAAAATAAAGAACTGATGAACGCTTTAATTCTAAAAAGAGGGTATCATACAATTATGAAGAGGAGAATAATACGTAATGTCCTAAATATAGGAAATAAAAAAGAGAAGAATTTTTTAAATTTTATGACATCATTAAATATAAATTATAATTATCGAAATATTTGTAATATGAGTAGAAAAAGATTAAATAAAGAGAAGGATTTTTTTGAAGGTGAGCATTTAAATAGACAATTAGGAGGATATGGATATCCTATGATGTTTATTGTAACATATGATAAACCAAGTTGGCAACCTTTTTGGGAAAATGATTGTGAAGTAATACCA…	897	813	0.018553
PF3D7_0424600	PF3D7_0424600_e1s1	ATGAAGTTTTTTAACGGATCAAGCTTTTCTAACTCCAACGGATTTATGGATAGCAAGAATCTTAAGAACTCAGCAATATTTTCTTTTGATGAAGAGGAAAAGAAAACTGCAAGCAGGAGTTTTTTAAGTTCATTATTATCTAAACGTATGGTTATACCTATGTTGGGTGTTCTCTATGTTGTCTTATTG	189	812.5	0.0185384
PF3D7_0209000	PF3D7_0209000_s2	TGTTATATGAAATTATATAGCGGAGATATAGGTGGTATTCTATTTCCTAAGAATATAAAATCAACAACGTGTTTTGAAGAGATGATACCTTATAATAAAGAAATAAAATGGAATAAAGAAAATAAAAGTTTAGGTAACTTAGTTAATAATTCTGTAGTATATAATAAAGAGATGAATGCAAAATATTTTAATGTTCAGTATGTTCACATTCCTACAAGTTATAAAGATACATTAAATTTATTTTGTAGTATTATATTAAAAGAAGAGGAAAGTAATTTAATTTCTACTTCTTATTTAGTATATGTAAGTATTAATGAAGAATTAAATTTTTCACTTTTCGATTTTTATGAATCATTTGTACCTATAAAAAAAACCATACAAGTAGCTCAAAAGAATGTA…	2394	803	0.0182873
PF3D7_1324600	PF3D7_1324600_e2o2-s3	ATTAATCATAGTGATTATATGAAAAGCATACAAAATAACAAGAATATGAAAAAAAGGAGAACGAAAAGAATACAGAATAATAAAAATAGATACACCTTTGCTACAGCAAGATATATTTATTTACAACCATATACCGGTATTATTAAAAAGAATACTAGAAAAAAAATAGAATTAAATATTTTCATTGAACACATTTTAAAATCACAGATAATTAAAGATTCATTTGTATTAATTATTAGAATACATAACTTTGATAAAGATATTTTTTTAACCGTCAAGTGTGTTATACAAAATAATATAATTACTTCTCTTATACATGATAATTTAAGTTTTTTAAAAAACAAAAAATATATACATAATAGAGATATACATACAGCAGACATGTGTTCCTCTGATTTG…	1500	813.5	0.0166371
PF3D7_0502400	PF3D7_0502400	ATGGTGTTCAAAAGTTCGTACATATTTTTCTTTCTCTTCCTTGTGATACTTTATTTTAATAACGTTGTAGAAGGGGAGAATGGAACTACAAATATCGAAAATAATCCTGGAAATAATGGTAATATGGGACCATCAGGACCAAAAGATAAAGACAAGAATATTGAAAAGGATGTAAATCACAACATGAGTATGAATAATAATAATAATAATAATAATAATAATAATAATAATGACAATAATAATAATATAAATAACAATAATAATAATAATATAAATAACAACAACAATAATAATAATAATAATGGTAATGGATTTTCAAATTTTTTTAATAAACTTTTTGGAAAAAAAAAAGATAACAAAAAAGAGGGAGAAGAAAAAAATGAAGAAGATTTAAATAGT…	1791	806.5	0.0165114
PF3D7_1142800	PF3D7_1142800	ATGATGAAAAGAGGATGGATTTTGTGTGATTTTTTTAATTACAATAAAATAGTAAGATGTGAAGAGAGTCATGATAAGAAGCATAAAAGTGAGGATTCGAAATATGGTGAAAAGAGAAGTAATGAGTTATATGAAGAGAGTAGTATGAATAATAACGATTCCTTAATAGATATGATTAAGAATATACCTATAAATCCATTTATTGATAAAAATGAAAATATGAATAAATATAAATATGGTGTTGAAAAAAAAAACATTGAACGGTATACTGGTGTGAATGTGTATGATGAAGTAGATGAAAAAGATGAGAAAAAAAACAAACCTGTAGAATATCCTTTTGCGATAAGTAATAAAATAATATTTAAGAAAAATAATAATAATAATAATAATAATAAAACA…	891	749.5	0.0163093
PF3D7_0905300	PF3D7_0905300_s4	AAAGTTACTAATAAAAAAATTAATTATATAATGTCAGAACTTGTAAATATATGTTTATCTGATTTAGGTACTAAACTAAATAGAACCAAATATGAAACATTAGTTACTATACATGTACACCAAAGAGATTTATTTACAGAAATATCTGCAAAAATTAAAGAGCATAAAATTAAAACAACTACCGATTTTGACTGGATAAAACAAACAAGAATTTATTATAAAGTAGAAAAAAATATTATTCTAATAAGTATATCTGATGTCGATTTTATTTATTCTTATGAATATTTAGGTATAAAAGAAAGATTATGTATAACTCCTTTGACCGATCGATGTTATTTAACCTGTGCTCAAGCTTTGGGTTTATGTTATGGTGGAGCTCCGGCTGGGCCAGCGGGTACA…	2670	815.5	0.0146627
PF3D7_1444100	PF3D7_1444100_e11s1	ATTCTCAATCAAATCGATTTGTGTAATAAAGAAGAAAAAAATATTGCATTTAAAGTTTTATCCTTAAAAGATGGAGTGTTTTATGTCATGCTAATACTTTCCAATAAAAAATACGAAGATGTATATAAAATATTACTACAGTTTGAAATTTCCAGAAGTGAAATTTTATCAATAAAAAATATACACAGATCAAAGAAAGACATAATTAATGAACATATAGTTATTTATAATCCTCTTGATGAAAATGTAGAAATGGAACCTTTGTTTGATTATAATTATATATTTGTTCAAAAGCCAATAATATTGGAGAAAAGAAAAAATAATATTATAAATATATATTTTTGTATAGTCAAGGAAGAAGAAGAGAAACATGTTATAATTTCCTTTACCAACAAAATT…	768	801	0.0138458
PF3D7_1035700	PF3D7_1035700_e1s1	ATGAAGAAAATATATAGTATTTTCTTTTCTTTATTTATTTTGAATCTTCATATATATATAAAAAATATCAAATGCAATGACCTAATAAATTATAATGATTCGAATCTAAGAAACGGATTACTAAATAATAGTTTAGATTTAACAAATGGATTAAATAACAAAGATAACAGTTTTATTGATTCTAAAATTGAAGAACATGAAAATAAATCTTACCAAAATAAAGATAATAATATCTCTATCGTTGGACAAGATGTGCCTATTACATCGGTATATTCTTCTAAAATTATAAATGCTAATGATTTAGAAGGAAATAGTATTGACGATACTAAAGGTCTTAGTGTTACTAATAGTGGATTTGATGATGGTAGTGCTTTTGGTGGTGGACTCCCTTTTTCTGGT…	2091	793.5	0.012862
PF3D7_0212400	PF3D7_0212400_e1o3-s1	ATGAGGAAGGAATATATATCGAACAAGAAGGTTTATGAGCTGCTATCACAAGGAACGTATGAGGGATATGAAGAAGAAATAAAAACAATTTTTGAAAGACGATATATGAATATCTTAAGTTATTTATGTCCACCTAATAAGAGGAGTTTCGAAGACGAGATCATATCATTAAAAATACAGAAATATATAAATGAATATTTGAGTTTTAGTAATTCAACATCTTATTTTTTTGGTTTTTCAAAAGAGTTAATTTTTCATTGTTTAAAGATATATTTTACAGATATAAAATATGAGGAGGTTGATGTTATGAAATCATGTAAGCATGTGAGTATGATGGATAGTGAGGACACATATAATAATAATAATAATAATAATAATGATGATGATGACAAATATAAT…	1500	800.5	0.0128484
PF3D7_0703500	PF3D7_0703500_e2s2	AATATCGAATGGAAAATAAATAATAAATTATATCAAGCATCTGCTCAACACGAACATGAAAAAATTGCAGAACTAGTAGCTACACAAAGGTTGTATATGATATTGTATGATGTTAAAGAGCAATTAATTCGAGAAAATGACTTTTCAAAAATGAGTGATGATAATAAGAGATTTATTAATTCATATGATAACACAACAATCATAAACAACAACACTAGTAATAATAATAATAATAATAATATAAATAATACAGGTAGCAATAATAATACTTTATATAACAAATATATGAGTAGTAACAGTAAAAACTTTGATGATGGTAATATGCTCAATCAAAATAAATTCAACAAAAACCAAGGAGCAAATAAAAATTTTAATGAACTTATGTACAACAATAATAAT…	2106	808.5	0.0119229
PF3D7_1348000	PF3D7_1348000_e4o4-s3	GATGATATATATAATTGTGAAGTTATTAAAAATAGACTATCCCAAAATAAGAAGGAATATTTTAAAAACAAAATTTTTCAATACACTTTTAAAAATACATATGAATTTAATGATATAAATAATAAAAATATACACATTCTAGATATTATCGAAAGATACAAAAAATTAAAAAACGAGATTTTAATAGAAATATTAAACACAAGTAATGATGATCAAATTATGAGTATCAAACAAAGTAATCTATACAAAAAAAAAAAAAAAAATTATATTCATTTATATCATAAAATAACAGAATTAAAAGAAATAATAAAACAATATTATCATAATTATAATATAACTTTATTTAATCAAAACAATGATTCCTTAAATAAAATAATGAACATAACCATTGAACAAAAT…	618	799.5	0.0117505
PF3D7_0515600	PF3D7_0515600_e1s1	ATGGAAAAAAATATTAAACTAAAAATTAGTGACACTAAATCACGTATCCTGAACTTTTTAACAAATAAAAAAACAAGCGTTCCTAATGAAGATGAAAATAATACAAACACAATAAATAAAACTAAAAATATAGAAAGCCCAAATAATAATTCTTTGAATAATTCTGAATCTAATGTAATAAATAAAAAAAATAATGAAAAGGATACAATAAAAAAAAAGAAAAAAAGTGGAACAATATTAAATTTAAAAAATGAGCAACCACCACAAGCATTGGAAAGC	279	748.5	0.0110486
PF3D7_0621100	PF3D7_0621100_e1o1-s3	GAATCCAGGTCATCCTTACATTATATACAAGGAGTTACCTCAGTGACTGTTACGCATTTTAGCATGAACTTATATAACAATATGAATAAAAACATTTCATCTAAAGAAATTTTAATAAATGATTTATGTAGTATTTTAAATATGCTACAAATTATATTGAATCTAAATTTAACTGGATTAACATCTAACTTTTTGAAAAAAAATAAAAATAACAATAATAATAATATTAATAACAATAATAATAATAATAACAGTAATAATGTTTTATACCATACGGAAGATAAAACAATGGAAAGCGAAACAGACAAGAGGGAACATGAAGCAAATAACACCTTATCACAAGAGGAACATACAAACAACAAATGTGATGTAAAAGAAAAAAATAATAATATGGTTGAA…	1155	799	0.0105175
PF3D7_0801300	PF3D7_0801300	ATGAAAAGCTTAAAAGTGGTATTATGTTTGGGTATGATATCAGCTTGTATGCTTGTTGGTACGTATGGTCGAATGAACGTAGTGTCTCATAACTCTATGAAAAAGGTTGGGGAAGAAGGTAAGGATGAAAAGATTATATCATGTGTTGTGGAATATGTCATCAAGGGGGATTTAAGTATTGATGATGGGGATTTTTGTGATAGTAATTCGATTTGTTCAAATAATCCTGGTTTATGTGATAATGGACAAGTAGTAGTACCAGGAGATTATTGTAGTAATTATTATGATATAACATTAGTTGTTGAAGAGTCAAGTTTTGTTCAGAAGGATTATTGGTTAAAAGGAACTATACCATTTTTAGAATCTATGGTCTTTAATTCGAATGTAAGTAAGGATAAG…	870	794.5	0.0104602
PF3D7_1363800	PF3D7_1363800-S1_C	ATGCTCGAGATGCTGAACTTATTCGTGTTTCTGATCCTGTTCATTATTCGCTTCATCGTCATCCGTGGCAGCAAGTACCGCTACGAGAACAATTCCGAGCTGCTGATCGAGCGCATTAAGCGCGGCAAAGAGGCCCTCGACGACATCCTGAAGGCGAAGATGAAGGCTGAGGAAGAGTACCAGAAGAACAAGAAGCGCATTAAGAGCCAGAACAAGAACTCGTATAAGAACAAGAAAGAGGACGACGAGGAAGAGAAAGACTACGATGAGGACGACAACAACAACATTTACGTGCAGGAGATTAAGTGCTACGAGTACGTGCTGGAGCAGCTCAACAACCTCAACGTCTACAACTGCAATGAGATTAATGAGAACAACAAGAGCTTACTTGCGCTTGCG…	1583	807	0.00930271
PF3D7_0628200	PF3D7_0628200_s2	TCGATTATAAATTCTATTAATAGAGATAAATTAAAACATTCCAAACCATTATATAAGAACAATATAAAAACGAATGATGATAATAAAAAATTAAGGGAAAATAAAACGAAAAACAAAAGATTAGTTTCAAATTATTTAGGTAATTTATTTTATATAAATGAAAATAATGAAGTTATACCATTAAATATAAATATTAAAGATGTTGTAAATAATTCCCCATTTAAATCCCCTCTGTTTCCTAACATGGTATTTATTGGTTCACGAGAATCTACTATTATTAATTTAGATTATGACACAGGACATGTACTAAGAAAATATGATGAAGCATCTAATGAATTGTTAGACAAACCCCCAAAAAAAAAATCAAGAAAAAATAAAAGTATAAAAAATGTGAAAGAT…	2346	798.5	0.00909866
PF3D7_1102500	PF3D7_1102500_e2s1	AATGTACCTAGTATTGAAGAAAATACATATTCAAGAGATATATTAGAGAAGAGATTTTTTAGAAATTTGTATGAAGATGAGTTAATAAGAAAGGATTCAAGCAAAGTTAACACTAGAGAACATGGAGGTGAATCAAAGGTATTGCATTTGAGCGATATAATATCTGAAGTTCTAAAGGATTCTGGTATGAGTAGAAGCAATGTTAGAAGTACTAATAAGGTTGATGTTATTTTTGATAAGAAAGGTGTGAAACCTAATGTATATGAAAATATAGAAGTGGAAGAAGATCCTAATGAAAAAGTAATATATTCTGTTGAGATATGTAGTAAGCAAGTTAGTGATTCTAATAGTGCTGATAGTAAAATGAAATATGGAGAACAACTAAATAATGATTTTATG…	1710	791.5	0.00877352
PF3D7_0936000	PF3D7_0936000-e1o2	ATGAAAATGTATTTAGCTGAAATTTTTAGTTCTGGTAAAGAGTCTTTGTTATCTTTAAAGGATACTTTAGGATCTAGTAATTTTTCTCCACTGAAACCATGTGAAGGCCTTGAGTGTTTACCACAAGTATTATTTTTGTACGTTATATTTCTTTTATTATGTACAGGAATTTTTATGCATAATAAGAATAAG	192	746	0.00858295
PF3D7_0323100	PF3D7_0323100_e1o1-s1	ATGAAAGATCCTTTAAAAAAGAAAGAAAGGGAAAAAGGCTATTATAGCTGTTTAGATTTTGATAATTTGTATAAAAAAAAAAAAAAAAAAAAATTAAAGTATTCTATTAACAGAGACAAGAATTTAAGTGACACGGAATTATATGAGAAGAACAAATTAGTTATACGAAAAAAGAATAATCATACATATATTTCAAAACATAATATATTAAGAAAAAGGAAAGAGGATGAAAAATTATGTTTACTTAATAATGTAACAGTATATAAAGATTATTTTGATAAAGGTGAAGATAAGAATGATGAGAAATTAAGAAACTTAAAAAAAATTTTAAGAATATATGAAAATGTGTCAACACATGAAAAAAAAAAATTATATGAGTTAATAAAATTCTTTTCTTTT…	1500	797.5	0.00821548
PF3D7_1435300	PF3D7_1435300_e1s1	ATGGGGAAAGAAAATATAGATAATAAAGGACTTTATGATAGTAGGAATGAAAAGGATGCTTGTGGTGTCGGTGTAGTAGCTGATATTAATGGGAAGTTTTCTAGAAATGTGATACAGAAAGCTTTACAAATATTATTACGGTTAAGTCATAGAGGTGGTGTACAAGGAAATAATGGAGATGGTGCTGGTATTTTAGTTGGAATACCACATGAATACTTTCAAATGTTAAGTGATACTTGTCAATTACCTTTTTTATTACCAGAAAAAGGAGAATATGCTGTTGCTCAAATATTTTTACCACAAAATGAAGAAAGAAGACTTTTTTTATACCATGAAATTGAAAAGGAAGTATATAATCATGGATTAGTCGTATTAGGATGGAGATCTCCTATACCTGTT…	2373	800.5	0.00809862
PF3D7_1144900	PF3D7_1144900-e4o4	ACTATTGGTATAGATTTTTTGAGTAAGACATTATATTTGGATGAAGGTCCTGTACGCTTACAATTGTGGGACACTGCAGGTCAGGAAAGATTTCGAAGTTTAATTCCAAGTTATATTAGGGACTCCGCAGCAGCAATTGTTGTATATGATATTACTAATAGACAATCCTTTGAAAATACCACAAAATGGATACAGGATATTTTGAATGAGAGAGGAAAAGATGTTATAATTGCTTTAGTAGGAAATAAAACAGATTTAGGTGATCTTAGAAAAGTTACATATGAAGAAGGAATGCAAAAAGCTCAAGAATATAATACCATGTTTCATGAAACGAGTGCTAAAGCTGGACATAATATAAAAGTTTTGTTTAAAAAAATTGCATCAAAATTACCAAATTTA…	495	745	0.00763333
PF3D7_1029500	PF3D7_1029500	ATGAATTTACCAAAGAATGAAAAAAATGAATCTTTAGAAGAAAAAGAAAAAGAAAAAGAACAAGATGTTGATGAAAATATAATTATTAAATACGCAGTTTTTCATTCGTGCTTATTATTACTATCAGGTATACAAATATATTTTATCTGCCCTTCCAAAAAAAAGGATAATAAACGTACTATTTTATATGATAAAAAAAAACAAAGTTTATGTTCGAACGAATTAAATATTTCTAAAGATTACGTAGAAATACAAAAGAATATTACTAAAGAAAATATAAAAATGAAGCATAAAAATAAATCCTTGAAAGATCATTTTTTAAATGACTATAATATTTATCTTAATAAACCAAAAAAAAAAATTCTTAATGAACATACCTCTTATCATATACCCGTTTAT…	414	797	0.00745103
PF3D7_0411900	PF3D7_0411900-S4_C	ATGCTCGAGCTTACGAAGAACGTTCACGAGTATCAGGACAAGAACTCACTGGGTCATGTGCTGGTCGCCGAGCGCATGATTAAGGATGGTTATAACATCTGCGTGAACAAGGAGATCCAGTACTGCGTGTGCACCTCGGAAGACGCGAGTCGCTTCTACAAGAAAACGTCTGAGAAGCTGAACAACTCGCAGTGCTGCTTCAGCATTAACGAGATTAAGAAGTACAACCTTAAGATCGACAAGGAGTACTACATTCGCAACCAGATCCTCTCACCGATCAACCGCCTGTGCCAGTACATCGAAGGCACGAGCGCGGAGAAGCTCTCTTCCTGCTTCAACATCTACGACGTGAAAGAGATTAAGACGGACAAGCAGATTGAGGAGAACTACTTGGAGACG…	1472	797.5	0.00656184
PF3D7_0923200	PF3D7_0923200	ATGTTCATGAGGTGGAATAAAATATCACGGTATACCCTATTAAGTGGTATGGTAGTTTCCTTTTGGTTATTCTATAGATCAGAGAATTTCAATTTATTGAGAAGATTAATTAGCAAGCTAAGAAGTTTGTTCCCTCTTTTTATAAAAAACAACTTTTTAAATAATGAAATTAAGAATAGTGTAAAAATATATTTTGGTAGTCAGAGTGGGACAGCAGAAGAATTTGCCAAAGAATTAAAAGCGAACTTGAATGATTTATTTCATATACAAGCAAATATTATCGATTTAGAATATTTTAATAAAGAAGAAATAAAATCTTTTGGAATCCGTATATTTATTGTTGCAACGTATGGAGATGGAGAACCAACGGATAATGCAGTTGAATTTTTTAAATGGTTA…	2340	744.5	0.00655293
PF3D7_1471200	PF3D7_1471200-S2_C	ATGCTCGAGGTATTCGTATCCGTTCCGAACGGCGTTCTGACAGGGATTATTCTGAGCGCTCTGGTATACGTGTGGCAGTCCAAGTCGACCTTCAAGTTCGAGATTTTCTACGACCGTGACACGGACACCAAATACTATGAGATCGAAGGCCACTTGTTCTACGCGAGCAAGAAGATGTTCACGCGCTTATTTAACTATGAGAACGATAGTAGTACCGTTAACATCGTGTTGAAGGGGAAGAGCACATTGTTCGACTACACCGCCATTGAGGCGCTGACGTCCGTCAAGCAGCAGTATAACGTAAACAACAAGAACGTCACCATTCACGGTCTGTCACACGAGTGCATCAAGAAGATCGCAAAGATGAACCATCTGTGTAAGCAGATCGACGTGGACTTG…	626	745.5	0.0063407
PF3D7_0419800	PF3D7_0419800	ATGAGAGAAGATATAAATAAATTAAAAAAAAATAATAACGACAGTAATTTAAGCAATGATGAAGAAGAGCACAGTGTAGATGATGAGGGCTCCATTAACAACGATAATGATAATAATGACAATAATGATAATAAAAAAGAAAAGAAAAAAGGTTATGAAAAGATTATAGAAGATATAAAAGAAGAAAATAAAAACTCTTATGTATCAAAAATAAGTGAACCAATGTTAAAAAAGAAATATTTAAAAAATGTTTTAAAAATATTAGATTATGTGTATTATGCAAAATTAAATAGTTCTCAAATTTTAAAAACAAATAATTCTTTAGATGAAGAAAAACAAAAATTATTAAAAAAAAAATTAATAGTTATAGGATTAACACAAGTAATCAAATGTATAAGA…	708	747	0.0050053
PF3D7_1472200	PF3D7_1472200_e1s2	TTTAATTCAAGCGAAAAACATGACGAGGATATTGAGGAAGTAAACGAAATGTATAAAAAATATATTAAAGATGGGAAATTCTTTTATTATAAAAATATAAATGACAAATTCCTTTATAACGTAATACAATTATATTTAAGTGTTATCGTTAAAATAATTGAATTGGGGAATTTTGAATTTTTAAAAATACTTTTTAATTATAATAGTTCGATATTTTCCTATATCTTCTTAAATAAAAATATGTTTTCTTTTTTATGTTCAATAGCTTGTATGTACAATTGTTTGAATGTTTTTATTTTTTATTGTGGTAATATTATAAAGTGGTCTGTATTTGAAACATATGTGGAGGAACAAAAACTCAATTTTTTAGAAAGAACAAAGAAAAGGAAAAATGTATCG…	2277	797.5	0.00481322
PF3D7_1216700	PF3D7_1216700	ATGAATATACTCCTCAAATATCATCTTTCGTACATATTCTTCTTTGTGCATTTAATTGTAATTAATATAAAATGTAAGGAAATAAATAATAATTTGGTCAATGATGAAAAAGATAGCATAAATAACCTGGAAGAGCCTAGCCCCTTCCATATTTTAAAAAAAAAAAACAGTAACAATATAGAGAATCATTCTAATAAAATAAATAATATATTTAAAAATAATTATAGTTATAGTTATAGTTACAGTTTATTAGATAATTCTTTATATGATAATAAATATGAATCAGATTTTTTTCCTCAAAAAAAAAATAATAAAATTAATGAAGAAAAGTATAAGGGAACGCATGGCACAAATTTTGCTATTATAAATGAACATATGAATGAGATACATAATGATATG…	3219	801	0.00454751
PF3D7_0404900	PF3D7_0404900	ATGAAGGGTGTTATTTTTTGTTTAGTTGTTCTTTTATGGAGACAAGCATGGGTATCGAGTAAAAGTCACAAATGTGATTTTACAAAAGAGAAATATTTATTATCTGGAGAGAAGGAAGTATCTTGTGAAATAGATGCGAATCCTTCGGATGATATTACTTTTATATGTCCTAATAAAATTGATTCATTATGTTTTCATACTGTAAATATATCTAAAAATATAAATCAAAATAAGTCAACAATGTCTATACAGGATTTATTATATGGTTCTGTAGTATATGGAAATACTCTTTTTATATCTCCTTATGTTAGAACAAACACACCGTTTTATTGTTTTTGTAATCTGGACACGGTGACAATACAAAAGTTTTTAAAAATCAATAGGTTCCTAAAAGATGAC…	1134	805	0.00441858
PF3D7_1120500	PF3D7_1120500_e1s1	ATGAATATTTTTGGCTTGCTTCTTTTAAATTTATTGATTAATGTAATATTTATACTTTGTAATATAAAAAGAAAAAATAAATTTTTAAAAAGGCAATTATGTTCAAATGAATTGAAACATTTGAAATACAAAAATGATAATATGATAAGAAAAGGTATACTTAATTATAAATATAAATATAAATATAGATTTTTCTACATAATAATAAAAAAAAATTATAGTAATAAAATTAAAAGAAAAAATAAAATAAAGCAAATAGGAGTGATGGAAAATATCAATAATATTAATGATAATAATAAATGGAGATGTTTAAGTAGTAGCAATCATATTTCAAGTAATATGATGGGGAACACATTTTACGAAAATGTATATATAAATTACCTAAAAGATTATATAATA…	2301	796	0.00438396
PF3D7_0719200	PF3D7_0719200_e1s1	ATGAAAACACATATTTCATGTTCATACTCTTTTATTTATATTCACAACATTGTTACATGGATAAATAAAATGGTGTATGTGAACAAAAATGAAAAAGTGAAATATGTCTTTCATCAAGTATATACACTACTTATTCTAAAACCAATCCCGGGA	153	789.5	0.00375923
PF3D7_1459400	PF3D7_1459400	ATGAAGAATATTCTTCGCAACCGCAAGGAGAAAGAGGACGACCACTCCTCAAGCAACGTTACCAACGAGGTTAAGAAAGCGAGCTTCATTAACTACATCTGCACTTCATTAAAGAACGTGGTGAAGAATAAGATCCAGTCCAAGCACAAGTACTCGCTTCTGATTGGTCTTTTCATCACCTTCCTTATTTTCTGCGGATTCTTCCGCTACATGACTGAGCTGTACCACACCCACTTCTACAACTTTAAGTACATCGACGTGAGCAACACCGAGAAGCTGAAGGAGATCTTCTTCTCAAACAACCCGTACCTCGTGTACTGTAAGAACGACAAGAACACCAGCATTCATCCGGTAATCAACGCCTCGCGTAGCAATCTCCCTGACATCCTGAACATCGCC…	1020	805	0.00351461
PF3D7_0731600	PF3D7_0731600_e1s1	ATGAATATTTCATTTACGGTGTGTAGCTTATTTATATTACTAATTAATGTTGTTTTACATGGAGCGCAAAAGAATTCTGAAAAAAATGTATACACGGAAATATGTGAAAAGCCAGCGAATGGAAATGAATCAAGTGTATACTGTATGAAAGATTACAAAAAGAAAAGTTCTTTATATGGTTATAAACATATTATGAATTTCTTATTAGGAAATCTAAATAAACATAAAAATAATATAGCAGTAGTGGAACATGATAATGGTGAACCAAACAATTATTTGACTTATAATGATTTTTTTAAAAAAGTTTTATGTTTTAGTAATACATTGAATACTTATGAAGGAAAAGGTATTGAAGAAAAAATGTATAAAAAAGAAGAAAAAAATAATGGTAAATTTAGA…	2433	797	0.00288038
PF3D7_0903500	PF3D7_0903500_e1s1	ATGTTTTTTAACGATGGGGATAAAAATAACATGTTTAATAAAAACAATAACATGAATAATAATAGCGGAACAAATATAAACACAAACGCAAATACAAATAATAATATGTGGAACCTTCAAAATAATAATTTAGGTAATAATACATTTTTTGGAAATAATAATATGACAAATCAAAATGACCTTAATAAGAATAATAGTCTTTTTGGTAATAGCCCAAATAATATGATGAAAACAACTGGTTTTTTTAACAATAATACTATTGGTAATCATCCAAACGATATAAATAAAACAGGTAATCTTTTTGGTAACAATACTGGTTTAAACAGTTCAACAGATATAATGAAAAATAATAGTTTTTTTGGAAGCAGTATCAATACACAAAATGATTTGAATAAAAAT…	2106	787.5	0.00167969
PF3D7_1017000	PF3D7_1017000_e1s2	TTATTAACACGTGGACAACAAATTAAAGTTACTTCGCAATTATATAGGAAATGTAAAGAACTAAATTATGTTATACCTAGTACATATATGAAAGTTAATACAAATGAAAAATATGAAGGAGCAACCGTACTAGAACCTATTAAAGGTTATTATATTGAACCAATATCAACATTAGATTTTGCTTCCTTATATCCATCCATTATGATTGCACATAATCTCTGTTATTCTACATTAATAAAAAGTAATCATGAAGTCTCAGATTTACAAAATGATGATATAACAACAATACAAGGAAAAAATAATTTAAAATTTGTTAAGAAAAATGTTAAAAAGGGAATTTTGCCCTTAATTGTAGAAGAATTAATAGAAGCTAGAAAAAAAGTTAAATTACTAATTAAA…	1665	794	0.00145382
PF3D7_1021100	PF3D7_1021100_e1o1-s3	TGTATAGAAAAATATAAAGGTTCACCTTATTACGAAATTAATAATAAATGTATTAATAATTTATTAAATTTTTTTAAAATAATATTACAAAAAGATTTTATGGGATTTAGTAAAATATCAACAAATTTTCTTCTTTTTGAAATCAAAAGATTACAACATATTTCTGAATGTACTTATATTTTAAATTATAATAAAGATTATGCTTATTTTATTATGGATAATTTAATGAAAACAATAATTGAAAGTACAGAAGATATATCTTTTGAATTAAAAAAAAATTATCTAGCAATTTTTACATCCATAATAATGAATTTAGAAAGCTTCTTATCAAATGATATTATACAAAAAATTTTGAAAACATTTTTAGATTATAAAAAATCCACAAATATCTTTAAATAT…	1500	793.5	0.00110619
PF3D7_1201600	PF3D7_1201600	ATGGTTTGCATTTACTTGTTTTGTTTTTTATTATTCCATTTGTTTGTTGTTAATACTCGTATGAGGATATTGTGTAATTTGTTGATAGTTATTTGTGAGTATATGTTCCCTTTTTACTCTTTTATATTGTTTAAATTTGTTAAGATGTTATCTTTATTGTTACCGTCAATATTATCGTGTGAGAAGAAATACCAGGTGTATAAGAATAATGGATATAAATTTGAGACCGTGTTAGATTTCATGACATCAGATAGTGAAATTCATTTGATAAGATCTATAGAAAGTGATGAGATATATATATCTAAGGTATATGATATATATGGTATAAATGAAGATGATTTGAATAAATATATGAATGAATTATATATAATGAATAAGTTAAGAAATTGTGAGAATATT…	1041	794	0.00110333
PF3D7_1401300	PF3D7_1401300-e2o2	AATTGCTTATTAGAAACTGAAAGGTTTTCCACTCCAAAATTAGATGACAATGTTTATAGAAGGATATTATGTGATGTAATTAAAGATGGTATAGGGGCAAACAATTTGAAAAAGAATATAAGACAGAGAACCAATAATGAACAAGATAATAATTATAAAGACGATGAAAGGTTTATTAAATATGAAATTCCTGATAGTTTAAAAAATGATAATATTGAATGCCCTTATGAATACGGTGAAGTATTTTATGGAACACATGGCATAATAAATTATGAATTGAAGGGGAATCCGGAATCTGAGACTTTGGTAATTACATTTCATGGATTATATGGATCTAATTTAGAATTTTATGAAATTCAAAAATTTTTGGTAAAATCGAATTATCAAGTTCTTAATTTT…	1218	794.5	0.0006237
PF3D7_1023100	PF3D7_1023100_e1s5	AAAGAAGTATTAACAGAAAAATTGAATGAATATAATACTACACATGTAGAATTACCATTAGTTTTATTTGATTATGCAATTATTCAAATATGTAAAATATGTAGAATTCTTGATTTTAATATATCACATTTAATGTTGATTGGATTTGGAGGATCTGGAAAACAATCTTTAATAAAATTAAGTATATTTATTAATTCTTTAAATTTATTAAATATATCAACAAATAATAATTATGATGTTAATAATTTTAAATCAGATTTACAAGAATTTCATTTAAAATGTGCCATAAAACCAGGAAATGTACATGTCTTATTATTGAAAGAAAATGATATATTAGATTCTTTTCTTCCTTATATAAATGATTTAACATCAACTGGTTTATGTAATGATTTATTTACA…	2892	795	-0.000340529
PF3D7_1216500	PF3D7_1216500_e1s1	ATGAAGTATCCCAACTTTTTTATTTTAAAAGTTTTTTATTTCCTTTTCTTTTATTTGAGCTTTGAAGATATTTATTACCATTGTATTAACATAGGAAAACCTCAGGTTAACACAAATGGAAAAAATGTCAACTCCAATGAAAAGGCTAATAATTTATCTACTGAATGGAGTAATAGAGGATTTAATTTTATGGATTTATTAAAAAATGGATATTTACAGAGTCATGGGAATTTAGAAGAAGTGAAAGATGAATTAGCTAATGAATTGGCTAATAAAATACAGAATAAAATTGGTGAATATTTGAAAGATGAAAAAAATTTGAGTGTTCTTCAACATCTCCAACTTGAAGATTTAGACGATTTAAAACATTATGTTAAGGATGTGTCAGAATATATAGGA…	663	787.5	-0.000442049
PF3D7_0905300	PF3D7_0905300_s3	TATTATGTTATTAATATAATAAAGAAAATACATATTTTTGAATCAACTATTGATATTGTCTTAAATCCTATAAATGATATGTTAAATATTTTAGAATTTTATATGAGTAATTTTTTAAAAAAACAAATGGATTCATTAAGACATTCAAATAATTATGATGAAGAAGAGAATTATCAAATAAAATTTATAAATAATTTAGAAAAGAAAAAATCTTCTGGTCAGTTATATAACTTAGATGATTCATATAATAAGAATTTATTATTTACATTCAATAAATTAAATGTAATGAAAAAAAAGTTTGTATCCTTTTATAAATTTGAGGTAGAGAAAAAGAATTTAATATTAAGCAAATTTAATGAATTAATAAATTTAACAAAACATGTAGAAGAAGAAATACAA…	2670	795	-0.000480596
PF3D7_0924000	PF3D7_0924000_e1o2-s3	GTGGTCCATAAGGGAGATAAAAATGATTTGCTTGTCCTAAGAGAAGAAAAGAAGAAAAAGGATAACATTAATAAAAATGACATGAATGATTATAACACATGTGATGATAATTGTGATGTGAATGATGATGATGATGATGATGATGATGATGATGATGATGATGATGAATTAGAAGATCAAGACGATATATGTATAAATCGAGTATTAGGAAATGAAATTGATGGAGGGGATATATTGGATAAAGAAAAAATAAAGAAGAAAAAAAAAAATAATAAGGATACAGTAAGTATAGAAAAAAAGGGAACGGTATTAACAGATAATTGGGAGAATGAAAATATGTTAATTGAAAAGACTTATGAAAATGGTAATTTAAGTAATAAATATATTGATATTAATGAA…	774	792.5	-0.000833753
PF3D7_0320100	PF3D7_0320100_C	ATGCTCGAGATGTGTGACGTTGTGCTTTTATGCCGTGTGAGCGATGGGATGACCCTCGTGGAGACCAACAGCGAAACCAAGTCCATCAGCCACAAGCTTGAGCTGAAGAAACTCTGCAAGAAGCTGTATTCCTTCCCGAACTTGAGCACGGTCACCAGTAATAACTTCAACTATCACTTCCTCATCGAGAACGGAATCGCATACATTGCCGTGTTCCCGGTGACCTATCCTAAGAAGTTGGCGTTCCTGTTCCTGAATGACATCTGCAAGCAGTTTAACGAGGAGCTGATGATTCAGTACGGTACTCACTCCATCGACTACCGTAGCATCATTGAGACAATCGAGAAACCGTATTCTTTCATCAAGTTCGACCGTAAGATCACGAAGATCAAACAGGAG…	746	740.5	-0.00115352
PF3D7_1416000	PF3D7_1416000-e1o4	ATGAATGTTCAAAAAATTGTAACTTTTTGTTTCGCTATATCTTATTTATTATATTGTCATATTATATGGAATGGATGTTATAACATTTATTCCAGTTCTGAAGATGAAGTATATAACTTATTATATTATAGAAAAAAAGCACCTAAAACCGTAAAATTAGAAATAAGGAATAAGTTAAAGATAAAAGATATCCAAAAGGTCTATGTTAAAAAAACACCATGTCCTGTCTTACCTAGACCAATT	243	802.5	-0.00124992
PF3D7_0727800	PF3D7_0727800_e1o1-s4	TATTTTATGAATAGAGAAAATAAGAAAATATTACCATTTATTCATAATATAGAATATATTAAGGTATGTAGTGAAATCTTTTCGTTGTGTATAACAGGCGATATTATTGATTATTTCTTGGAAGTGTATAAAAATAATTTGCATATATTTAATGAGCTTATAAGAGGTGTGCATATATTTTGTAGGATGTCTCCAAAAAATAAAGAAATAATAATTAAGACGTTAAATAAAATTGGTTATATTACGATTATGTGTGGTGATGGGACAAACGACATGGCTGCTTTGAAGGCAGCGCATGTAGGTGTATCTTTATTAAGTATAAAAATAAGTTATAAAAATAGAGATGGGAACAGAAAAAGTGTGTTAAATGATGATAGAAAGAGTTTGTTAAATAATCAT…	1392	792.5	-0.00125087
PF3D7_1034400	PF3D7_1034400_e1s1	ATGATTAGGAATAATAAAAAATACATAAGATTTATGCAATCAAGTTTTTGTAGATTCTCAAATATTAAAACGAAAGCATATGATATAATTGATCATCATTATGATGCAGTAATTGTAGGAGCTGGAGGTGCTGGATTAAGATCTGCATTGGAATTATCAAAAAATAAATACAAGGTAGCATGTATCAGTAAATTGTTTCCAACACGATCACATACTGTAGCTGCTCAAGGTGGAATAAATGCAGCTTTAGGTAATATGACTGAAGATGATTGGAGATGGCATGCTTATGATACTATCAAAGGTTCAGATTGGCTTGGGGATCAAAACGCTATTCATTATATGTGTAGAGAAGCTCCTGATTCTGTATTAGAATTAGAAGAATTTGGACTCCCGTTTTCA…	1893	792	-0.00208872
PF3D7_1465600	PF3D7_1465600_C	ATGCTCGAGATGATCCGTAAGCGCAAGAGCAAGATCGGCGACAACGAGCAGGAAGACGGTAAGAACGAGGAAGGCGAGGAAGCAATGGAAGGCTTGTTCCTGTACAACAAGAAGGACTCGGCGATCAAGTCCATCGAGGAAGTCTACGAGAATGAAGAAAAGAACCAGAACAACGAGAGCTCGACCAACAAGGGGATCACAGGCAACTACAACATGGACCAGATGGAAGACCGCATTTACCACGAGGACGAGGAAGGCTCAATCAACAACGAGTATGACGACTCAGTTGAGGCTCGTAAGCTTAACACCCTTCAGAAGCTGGTGATGGAGAACAACAACACCGACGAGATGAAGTCGAAGACAATTGACGAACTCTTCGACAAGTACGACAAAGAAATC…	1538	740	-0.00211276
PF3D7_1346000	PF3D7_1346000_e1s1	ATGAAGGACGAAATAGAAGAAGGAGATGAAAAAAAGGAAAATTTTCAAAATAGACAGAGGGAGATTGAAACAAATGAATATAAAACAAATCATGAAAACAACAACAATATGGATGAGATAAGAAAAGATAATAATATATCAAATAATATAAATGAAAATTTAAAAAGGGACGATTCTAGTGATTATAATGTTAAAGAAAATATACCTATGGTACATAAGGATAGTATTATAAAAGAGGATATATCATCAAAAAATGATTTATTGCTAGATGATAAAAATAATTTTGTAAAAAACATGATTACACCTGAAATACAAAACGAACAAATGATAGATAAAGACATGTTAAATAATATAAAGTTGTATAGCAAAAAATTTGAAGAAAAAAGGAAAAAAGATATA…	1938	791.5	-0.00293214
PF3D7_1212500	PF3D7_1212500	ATGCCAGATTTTTACTTTTTAATAAGATGGTTATGTAAAGTTATAGTAAAATCAGTATTTAGAGATGTGAACGTTATAAATCCAGAAAATGTGCCCTTGTATGGATCTGTTATATTTGTTGGGAATCATAATAATCAGTTTATTGATGCGTGTGTATTGATAGCAAATATTCCTAGACAGGTAAAATTTATTGTTGCTGAGAAATCTATGCGAAGAGCCGTAATTGGAAAATTGGCTAGTGTTATTGGTTGTATTAGTGTGAAGAGACCCCAAGATTTAAAATTTAAAGGTATTGGTCATATATGTTGGAATGAAGGGGATGTAAAAATAACAGGAATAAATACTAGATTTCGATTGGATGTTCAAATTGGTGATAAATTATTAATACAAAATAAAATG…	1749	802	-0.00315275
PF3D7_1103800	PF3D7_1103800_e1s4	AATGATGATAATAATAATGATGATAATAATAATGATGACAATAATAATAATAATAATAATAATAATAATAATAATAATAATAATAATAACAAATCTGATAAAAATAAGGATGATCATAATATACAAACAAACAACTATTCACAAAGTGATATACCAAATAAAAGTTGCAATGTTAATACCAATATTAATGATAATGAGAATTCTAATTTAGCTAGCCATGCCAATATTAAAAATCAATTTAATAATAATAATAATAATCTTAATAAGGATAATATAAATAAAAGTACCTATTATACTTACAATAATAATGATAAAAGCCTTTCAGAGTTAGAAAGAAATATTTTATTAAACGATACTCTTGATACAACTACTATTGATGCATTAGCGAAAATGATTATT…	2562	791	-0.00333568
PF3D7_1253300	PF3D7_1253300-e3o3	GAATCACAAAATGGTATATGTAGACAAGGAACAAAGGATTTATTAAAAAATTTAAGAGGAATTGCACCTAAACTTACATATAGACATACGGGTAACCCAAATCAATATGGTAAATCACCTCCTAAAATCACATGGCAAGGATGTTCGTATGATTGTAATATGATGGTTTCTACTTTGGAAACAGAACAAACTAATAGATTTTATAACCTACTTAATAAAAAGGCTCCAATTGATGAAATAAAAAGTTTCATTCGTTCATGTATAGATGAATTTGATAAATTACATACCGATTTATATGTGAAGTATGAAAAAATATCTAGTGAACAAAAA	330	791	-0.0034283
PF3D7_1310300	PF3D7_1310300	ATGATTGATCCGGTTAAAAGAGATTTGACAAATCTTTTTTTAGAAAAGCGGGAGATGGCAAAAGAAGAGATAGACCCTCGAAAAGATTGGTTAAAGAGAATATTGTTGAATAATAACACGAACGATTTAAGGATGTTTTTAAAGGCTAGCGAATTAAAAACAAAAGAAGGTGATTATTGTATGACATGCAAAAGTAACGTAAAACAGTTATTATATCTTCATACAAAAAAGAATTATTGTCATTTATGTGAAGAAATCTTTTGTGCTTATTGTGTAAAAAGTATTGATTTTATGAAAGATGAAAAAGAGAAATATATAAAAATAAGATTATGTAGAAATTGTTTTATATATATAAATGAACTAAAATATATAATTAATCCAAATTTATCTGTAGATAGA…	741	791	-0.00346288
PF3D7_1015200	PF3D7_1015200-e2o3	GATAAATACATATTTAAAAGATTATTTCATTCAAAAATGGATAATGCTAATAAATTACCAAAATGGAATCAACCCTCAAAAGAAGGAAAGAAAATAACTAACTTGTTTGTGAACAATTCCTTGACACATAGCAAAGTGGAATTTATACCTCAG	153	800.5	-0.00364489
PF3D7_0717500	PF3D7_0717500_e1s1	ATGGGACAAGAGGTATCGAGTGTTAACAACACAAAAAATGAACACCATAAAACAAATAAGAAAAGTTTGAAAGGGGGTAATGAGAGACATGAAATGAAAGAGAGTAGTGTAGGTATATCTAAGAAAATCGTAGAGAATAGTTTTAATAATAGTAAATTAAGACCTGGTATGTTTATACAGAATAGTAATGTTGTATTTAATGAACAATATAAAGGAATAAAAATATTGGGTAAAGGTTCTTTTGGTGAGGTGATACTTAGTAGGGATAAACATACTGGTCATGAGTATGCAATAAAAGTTATTAGCAAAAAACATGTTAAAAGAAAAACTGATAAAGAAAGTTTATTAAGAGAAGTAGAGTTATTAAAAATGTTAGATCATATTAATATAATGAAATTA…	798	791	-0.00396113
PF3D7_0303900	PF3D7_0303900_e2s1	GATTTTGGAGAACATCATTGCGATAGCGACAAAGTAAAAATATTAGATTCCAAATTTTATAACAAAGATTGTGGTGGAGAGAATGCATTGCCCACATTTGAATGGCTAGATAAAAACAAAGGAACAAAATCTTATGTTATAACATTGACAAGCATGAATAATTCGACTAAGGTTGTTCATTTTATAGCATGGAATATACCTAGACATATAAATCTAATAAATAATTTTACAAACTTTGAAGAAATGAATGCCGTAGTTGGTTTAAATTCTTTTAAAAAAAGAAGTTATGAAGGTCCATGTTCTACTAATGAGTTACGAGAGCAATCAACTGAATGTTTAAAATTTAGCATATACGCGCTAAAA	363	791	-0.00406498
PF3D7_0306400	PF3D7_0306400_e1s1	ATGATTAAAAAAGTTGCTATTTGTAGTGGGACCTTGGGTATTTTATCCTATGGAGGGTTTTATTTTTTAAAAATAAATTTTCAAAAGAATATGATAGATAAAGATGTGACATATAAATATAGTCCTTGTATAAAAAGAAACGAAATGATTAAGAAGCTACAAGAAAATCAATATGATTTATTAATAATAGGAGGAGGTGCTACAGGTGCTGGTTTGGCCTTAGATGCAGCCACAAGAGGATTAAAATGTGCGCTAGTAGAAAAGAATGATTTTTCAAGTGGTACATCTTCTAAGTCTACCAAATTATTACATGGTGGTATAAGATATTTAGAAAATGCAGTAAATAATTTAGATTTTACAGAATTATATTTTGTATGGGAAGCATTAGCAGAAAGAGCG…	1959	791	-0.00406498
PF3D7_1025500	PF3D7_1025500_e2s2	GTATGTCAAGAATTTTATGAGATAATAGATACTTATAATAAATATGATGAATTGAATATTGAAGAAATAGATATAATGGATGTTGAATTTATTACGAATTTATTTTTATCATTAAAGGATTTAGAAAATAAAATAAAACGAATGAGCAAACAATTAAATATTCATATATTTAAAGTTGATAATACAATATTAATAGAATATATATTAAAAAATATAAATAAAAAATGGACTCTTTTAATAAATTATTTACCTACATTAAATAATAAAACTATAGAGACTTTAACAATAAAATTAGATACATCTTTAAATATTATAAATAAAACACCAACAAATATAAATGAACTTGTATCGTATATAGATTTTGTTAATACATTTTCTATAAATTTAGTTTCCATAGAA…	2073	799.5	-0.0042587
PF3D7_0501100	PF3D7_0501100_e3s1	GATTACTATGCTGTATTAGGTCTTACTAAAGATTGTACACAAGATGATATAAAAAAAGCATATAGAAAACTGGCTATGAAATGGCATCCTGATAAGCACCTAAATGACGAAGATAAAGTTGAAGCAGAAAGGAAATTTAAATTGATTGGTGAAGCATATGAAGTGTTATCAGATGAAGAGAAAAGAAAAAATTACGATTTATTTGGACAATCAGGATTAGGAGGAACTACAACTAACGATGAAGCATATTATACATATTCAAATATAGATCCTAATGAATTGTTCAGTAGGTTTTTTTCTCATGATGCAAGTTCTTTCTTTTCGCAAGGTTTTGATGACTTTCCATCTTTTCAAGGTTTCGCAAGTATGAATTCAAGAAGACCTAGATCAAGCAGATCA…	402	750.5	-0.00427886
PF3D7_1215900	PF3D7_1215900	ATGGTGATATGGAAGGGCAATGTAAAAAATAAAATATTGTTTTTAATTTTTGTAGCTTATTTTTTTGTTTTTGTTAAGATAAGCAATGGTCAGTTGATTAAATTGGATGGTCAGAAAATTAACACGAATTATATTCTTTATGTTTTGAAAGGTTTATATATATTTGGAGAGAATGAAAGTCCCTATGTTTTATTAGGAAAAAAAAAGGATATGGATTTTAAGGCAGCTCATGCGATTTTTGAAAATGTGGGTATAAGTACGACAGATAATAAGAACACGAAATATTTTTCTTTTGAGATGGGCGACACGACAAGTGGTAATAATGAAAATAATAATAATAATAATAACGACGGTCATAATAATAATAATAATGACAGTCATAATAATAATAATAATGAC…	1965	792.5	-0.00484141
PF3D7_0414000	PF3D7_0414000_e7s1	GTTGATAAAACGTATGTTAAAGCTGTTGATACAATTTTGGAAAACCACTATTTTACTTTAATTGTCGAAGATATGCAAACAGCAAAAAAAATAGTTGAGTTTATAGAAAAGAAGAGGGAAGAAAGAACAAGTAAAGAATTTAATTTTAAAGAATTTTACTTTGGTAAATTAACCATAGTACCTTTATTAAATATAAAAAAATTTAATGAATTTAATTATCCCAATGATAAAAATATTGTTCCTTTAATAAAATGTGTAAATTATAATAGCAAAATATATGAATTCTTAAAAAATATTTTATTCAAAACGATTATTGTTAAATCGTTGGAATCTTGTGAGAATTATTTGGAAGATAATTATAACTGTGTGAATATTGATGGAGATTAT	387	788.5	-0.00517545
PF3D7_0815300	PF3D7_0815300-S2	ATTAAGAAAGAGATCAAGATTCAGGACTTCATCATGAACACGCTCTTCACGGAAAAGGAGAAGAACATGATCTACAACTACATCCACTCCTACAACATCGAACGCAAACTGGTTGCGAACTTCACCATCAGCCAAGCCGTGAACAACTACGAGAAGGGTAAGAACATCCCGTACATCCTGGGATACAACCAAGACAACATCTTGATTGATAAACTGAGCAAGATGTGTAACTTCAAGTCCACGAACTGCCACAACAACAATAATAACAACAACAATAACAACAACAACAAGAACAACAACAACAACAACAAGAGCTGCGGGACCTACATTTACAACTACAACAACTACGGCAGCCACACCTTCGGCGGGTACAACAAGCTCCACGTCCGCATCCTGCAG…	1794	785	-0.00557806
PF3D7_1125200	PF3D7_1125200-e4o4	ACCTTTGACGGTAAAAATTTGAACACGTCGCTGGCACGACTAAGCCTAGTAATGTTCGTTTCTCTCTTATGGATTTACAGATATAATTATTCACATACTTTTCCCATATTTTCGACCATCGTCTTATTTATTTTTACCCTTTTTATTGGCATAATTATATTCCACAATCATATAATATTAATTATTAACATCTTGTTACAAATAATAATAACGATCTACCAAATGATTAAATACTCCTTTAAAAAGATATATGACCATATTAACAAGAAACTCCAAAACTATTATAAAAATAGGAAAGGAAAGGAAACCAAAAAAATAAAA	321	791.5	-0.00583856
PF3D7_0800600	PF3D7_0800600-e2o2	TTACCAAATGATAGAAATAATAAAGTATCATCGATTAAATCATCTGAAAAATATCAAAGGAAACTTTATGACTTACAAAGGATTGTTAAAGGTAGAAAAAAGGATTCAAAATTAAAAAATAAATCGGAAGGTACAAATGAACAACAAAATAATAAAAATAATGGTAACATTGTAAAGAATGAAGAGTTATTAAGTAGATCAAATAAGAAGTGTTTAAAAGTAGATTTAAATAGGGAAAAGCTCTTAAAATATTTTAGTTCTGATAAAGAAAATATTAAAGATAAAGATATAAATTATAATGATCTTACAAATAATTTAAATAGGAAGGAATTATTAGCTGTGCTTGAAACTATAAATGAAAAAACACCAAGAAATGACCTTATAAATATATGGAGTCAT…	777	738	-0.0058698
PF3D7_1021100	PF3D7_1021100_e1o1-s4	TTAAAATATTTAATAAATAATAAATTAATCAATCAATTAATTATACAATGGTTTTTTAAAATTTTTTCCGTATTTTTAGAAAAACATTTTCATTATTTTCGAGAAGAGTATGAACATATAAAAAAAGTAAATTCAGAATTAAATTCAGAAATATGCATGAAAGAAGATGATTATAGTTTGTATTATGATATGTTATATAAAAATAAAAATTATATTTTAAATTATTTAAAAATATGTAAAAATATATTTGTTGTACCAAATGAATATAAAAATAATCAAGAACATAAAATGTTTTTTCAATATATATATAATGATGAAAAAACGGTTCTTTTAAATTCACTTCTTTCTACTATAGAATATTTATTAAATAGTTATGATTGTGATATTACCAAAAAATGT…	921	787	-0.00607209
PF3D7_0730900	PF3D7_0730900_e2s2	TCTGTACCAAGACTTAGTGTGAATGAATTTGAAAATAATGATGATGTAGGTCTTAAGAAAGAAATATCTACACCAAAAAATTATGTGAGTGAATTTAAAAATAATTTCGATGGATGTCTTAAGAAAGAAGTATCTGTACCAAGACTTAGTGTGAGTGAATTTGAAAATAATGATGATGTAGGTCTTAAGAAAGAAGTATCTGTACCAAGACTTAGTGTGAATGAATTTGAAAATAATGATGATGTAGGTCTTAAGAAAGAAGTATCTGTACCAAGACTTAGTGTGAATGAATTTGAAAATAATGATGATGTAGGTCTTAAGAAAGAAGTATCTGTACCAAGACTTAGTGTGAGTGAATTTGAAAATAATGATGATGTAGGTCTTAAGAAAGAAATATCT…	2085	789.5	-0.00619537
PF3D7_0418000	PF3D7_0418000-S4_C	ATGCTCGAGATGTACGAAGAAAGTGTGATCATCAACTTCAATGAGATCCCGTTCCTGAACATTAACATTGAGGACGAAGACACCGGCAACAAGCTTAACTACATTAATTACAAGAATAAAGAGTACAAGCACTCAGAGGAAAAGAAGCGCAACACGTTCGTGAACATCTACAACCTTGAGTACGACAACAACATCATTATCGACGAGTACATTAAGTACTACTACAACGAGTTCATCCTGCTGTACAACAACCTGTGTAACAACAACTACAAGATCAAGGGCATCCTGCACATCTCCAGCGACCAGAAGTGCCTTCAGAACTGCTACAAGATCATTATCCCCCACAACACCTTCATCACGCTGATGATCGAGTGCTACATCAACAAGATCTACGAGACC…	1583	798.5	-0.00642136
PF3D7_1361300	PF3D7_1361300	ATGTACGAGAACAAGATCGTCCCCCTGCAGATGGACCGTCGTAAGTATTTGCAGTCATGCGTGGAGAACATGTCCATTACGTTCGTACTGTTCGGAACCATCAACATCTTCTTTAACCTGCTGATCAATCTGATTAACATCGGCCGCATCAACTATGAACACTTCTTCAAGCTGTTCTCGATCACAAGCGGCCTGTGGATCGTGATCATCCTGGTGCAGATCACTTCCTATCTTTTCAGCTCGGGGTTCTTCGAGAACCTGGCCACGATTTTCCTGCACGATAACGAGCGCAACAAAGGCGACATTTGGAACATCAAGAGCATCGGAATGTTTCTGATCAATATCATTACGCTGGGTTGGCTGAGCATCTTCAGCTTTTACGGCATCTTCTCCTACATC…	714	788.5	-0.00692626
PF3D7_1007200	PF3D7_1007200-S2_C	ATGCTCGAGATAAACAATGAGAGCGACGAGGACAGCAACGAGAGCTATTCATCGAAGGAGTCATCCAGCAAGCCGTCGAGTCTGGACCAGACCTCAGAGTACTCCTCTTCCATCCTGAGTGACAAGGTTATTAAGAAGAAGGTTTCGATCAAGAAGAGCACGAGCAAGCGTCTCAGCTTCGACCACAGTATCAAGTCCGAGAAGAGCGGCGACAGCAAGAACTCCTTCCTGAGCGAGAAAACCGACGAGCAAGACGACAGCTACGAGGACAGTGAGAAAGAGGAAGAGGGTAAGAAGAGTAAGAAGGAGAACCTGAAGAAAGAACCCAGCTCTGACAATTACCCATACGATGTTCCGGA	413	787.5	-0.00745422
PF3D7_1358700	PF3D7_1358700	ATGGGGTTACACATTCTTCCAAAGAATATTATGCATTTAGTAAATATGATAATATGCATAATATGCCCAGCCCTGAAAACATATAATTTATTAATAAATAAAAAAGAGAAAGCCACAGAAGACACCTTACAATATATTCATTTTTTAACATATTGGATATTATATTCATTTTATACATATTTTGAAAGTGCTTTCATAGTAAAGTTAATGAATGTCGTACCCTTTTATGGTGAACTAAAAATTATGTTTTTCTTTTGGTTATATAGTGATACCTTTCAAGGGGCTGGATACTTATATTTTAAATTTATAGAAAAGCATTATTCAATCATTGATAAAAAAATATGTGACTTAATTCAGAACAAAATACCCAAAAATGTATCCAACTTTTTCTATTTTGAA…	459	790	-0.00809067
PF3D7_1462800	PF3D7_1462800_e2	GAAGTAGTTGCTATTAACGACCCATTTATGGACCTTAACCACTTATGCTATCTCTTGAAATACGATTCAGTACATGGTCAATTTCCATGTGAGGTAACCCACGCTGATGGATTTTTATTAATCGGAGAAAAGAAAGTCAGTGTTTTTGCTGAAAAGGATCCATCTCAAATTCCTTGGGGAAAATGCCAAGTAGATGTTGTATGTGAATCAACTGGTGTATTTTTAACCAAAGAATTAGCTAGCAGTCACCTTAAGGGAGGAGCCAAGAAGGTTATTATGTCCGCCCCACCAAAGGATGACACCCCAATTTATGTTATGGGTATTAACCACCACCAATATGATACCAAACAACTTATTGTTTCCAATGCATCATGTACCACAAACTGCTTAGCTCCATTA…	927	800.5	-0.0084554
PF3D7_1363800	PF3D7_1363800-S2_C	ATGCTCGAGAAGGTGATCAAGAAGATTGTGCAGAAGAATAGTCAACAGTACCAGAACAAGATCAAAGAGATCGAAAACGAAAACAACAACATTCTCTACAACGACATCGACCAGAAGACCATCTCTATCATCAACCTTTGGAGTTGCTTCAATGAGAACATGGACAGCCTGTACGAGGACGACGAGGACTTCAACCTGAGTAACTACAATTCTGACGACGAGAGTAGTTCCAGCCATACCTCGCTCGCCAGTGAGCACTTCACCTTGAATGAGATCGACGAGTACAACGACGAACCGATCGGCATCCGTATTAAGACGCTGCATCGCAAGAACCGTCCAATTTTCTTCCACTACATGCCGAGCCCGACCAACATCAAAGCGTACACGGAGAACCCAATT…	677	784	-0.00849182
PF3D7_1428800	PF3D7_1428800-e3o3	GATAATAATTTTGCTTGGTGTAATGCTAAAAACACAATAGACAAGGATAAAAGCAAAGTGGACATTGTTTCTGCTAGTATTTTTTCAACAGGTAATATAACATTAACTGGGGGGAAAAGTTACGAAAACCTTCAAAAATGTATAAATATATTATTACCATATTTAATTAAAAGTAAATCGCAACAT	186	790	-0.0084989
PF3D7_1025500	PF3D7_1025500_e2s1	AGCTTACCCAACTTTTCTTATGAAATAGCGTCTTGGGAAAATAAAAAAAAGATGGATGTGCTATCGATTTCCCTGAACGGTGTTATGATCAACGAAAAGAACGAAACGAGTTTCTATGAACTTAATGAATGGAAAAGTCATATGAATTTATTAAGGAGCGCATTAGATTTAAGATTTATACGTAAATATAAATTATATAAATATTTTTTTTTTTTGAAAAATATGATAAAGAGCACAAAATTTAAAAATAAAAAATTTTACATTAAAGAGAATTTATTATTTTTGAATGAAGCATTTTTTAATGGTTTTATAAAAATCGAAAAGGTATTAAAACATATAGGTAAAACAAAATTAATAGACATAAATATAAATAATATGACTATAGATCAATATGTAGAA…	2073	781.5	-0.00879589
PF3D7_1015900	PF3D7_1015900_e2s1	GATTCTAGAGGAAACCCAACTGTAGAAGTTGACTTAGAGACCAACTTAGGTATTTTCAGAGCTGCCGTACCATCTGGTGCCTCCACTGGTATTTATGAAGCCTTAGAATTAAGAGATAATGACAAGAGCAGGTACTTAGGAAAGGGTGTTCAAAAAGCTATCAAGAACATTAATGAAATTATTGCTCCAAAATTGATTGGAATGAATTGTACTGAACAAAAGAAAATTGACAATTTAATGGTTGAAGAATTAGATGGAAGTAAAAATGAATGGGGATGGTCAAAAAGTAAATTAGGAGCTAATGCTATTTTAGCTATATCCATGGCTGTATGTAGAGCTGGTGCAGCTGCTAATAAAGTATCTTTATACAAATATTTGGCACAATTAGCTGGAAAGAAA…	1296	797	-0.00911139
PF3D7_1314500	PF3D7_1314500-e4o4	TTGGAGGTGTTTGATGAACAAGAACGGATGATGGAGAAGTCCGATTTATATAAACAATTTAATGAAAAAATGAATTCCAAATTAATCCTGTGGTTGGAAATACAAATCATTTTATTGGTTGTTCTAACATTAGTTCACATATATTATATAAAATCTTTTTTTGAAATAAAAACTATAGTT	180	785.5	-0.009525
PF3D7_1301700	PF3D7_1301700-e2o2	AACTTTAAGAACAATTTTTATAGGAAGGATAATAAATATAGTAGTATAAAAATAAGAAGTTTTAGATCATTAGCAGAAAATCAGAAAGTCGAAACAGAACAATCTACACCAGCTAAACCAGAACCAACAGAATTCGTAAATAATGATATTCACCAAAACAAAAATACCTTCAAAAAATTAAAAAATAATGAAAAAAAAAAAGAAATATTGGAGGAAAAAATGAAAGATTTTGTAAAATTGTACGTAAATAAATCATCTGGTGAATGTCAACGTTACAGATTACAACAACACCTTAAAAATTATTCATCCAGTAACGAATACAAAAAATTTATGAATAAGTTTGTTAAATTTTTAAAAGTTCACAACGATCTCAATGCACTCAAATCACAATTACATTTC…	663	791.5	-0.00956402
PF3D7_1450100	PF3D7_1450100	ATGGTGTTAACAGAACTAGGTACGCAAATTACGAACGCTTTTCGAAAACTTCAAACATCGACGTTAGCAGACGATGTTGTAATAGAAGAATGTTTAAAAGAAATAATAAGGGCCTTAATATTATCTGATATAAATGTTAGTTATTTAAAAGATATTAAGAGTAATATAAAGAATAATATAGAAAAGAATATAGATATATATGGAAACAATAAAAAGAAGCTAGTACAAAAATATGTGGTAGAAGAATTAATAAAATTATTAGAAGGAAAAAAAGAGGGTTACAACCCGGTGAAAGGTAAAAGAAATGTTATATTATTTGTAGGACTACAAGGAAGTGGGAAGACAACAACTTGTACAAAATATGCACATTATTATCAAAAGAAAGGTTTTAAGACTGCT…	1500	790	-0.00988155
PF3D7_1447700	PF3D7_1447700	ATGGAAAAGTATCGAGAATTTGCTGACGCGTCAACTGGAATAAATCCTTTTTTACCTGTATGGGTAAATAAGAAATTAAGTTTTCAAGAAAAGTTGTTAAAATTATTATTATTTCCAATAGTAGTAATGCGTTTATGTTTTCTTAGTTTGACTTTAATATTTATGTTTTTTTTAAATAGCTTGTTGAAAATATTAATATTTCAGTGTATAAAAGATTTTTTTTATCAAATAATACAGACAATATATTGTAGATTATTATTATTTTATTTAGGCTTTTTATATCTAGATGAACAATATGCAAATAATAAAAGAGTAAAAATCAAATGTACTAAACAAAAAATTCCATTCACATATGATACATATGGTCATATTTTTTTATCTAATTTTACTTCTTTTGTT…	1026	798.5	-0.0106694
PF3D7_1025500	PF3D7_1025500_e3s1	GGAGAACTTAAAAGTTACGTTAATCAAAGGAAAATCATTCATATCATAAAGTTAAGCACAAGAAAAAATAAACAAGAGGAAGAATACAATGTGTGTAAGGGAATTATAAAATATGTTTCACATTTTGTAGGATATGAAAAACTTAAAGATATAATAAATAACATTTGCTTATTATTTAATTTGAGAAGAGAATATCAAGAAACGCTAGCTCAGTATGTAGACAAAAAACAAAAAGAAGAAGAAATAGATGGTTTAAATTACGTCGAAACATTGTTTGACGATGAGAATTATAGAAAAAAAAAGAGTAAAAAACATGCTAGTGATTGGAAAAATGAAGTTGATAAAATAGTTATTGGTTTAATAAAAAAAACGAAAATACCTTTTTTAAAATATCAAGTA…	2823	798	-0.0113593
PF3D7_1346000	PF3D7_1346000_e2s1	GATTTAGAAAATGAACAAATAAAGTTATCCGACACATTAAATATAGCAGAATCAAATATCAAATTAATTAATTCGAAAATGGATGAAAGTATAGAATTATTGAAAAATACATTAACGAAAATAGAATGTCAAAACAGTACCTATAATAAA	150	795.5	-0.0119073
PF3D7_0318100	PF3D7_0318100_e1s1	ATGAACACTTTTTTTTTAAGTAGATTTAGAGGGGGCACTTTTTTTTTACAAAAGTACGAGAAAATATGGAACCGAGCTAAAGGGTATCATACATATAATTACATTTTCCAGAATAATAAAAATATAATAAACCATAAAAAAAAAAATAGAAATTTGTTTTTATATGAAAAAAGAAATTTCTATACAAGTAATGATGGAAAAAAATATACAAAAAAGTTTTGGAACCATTTAGGTTTTGTGATTATACCTCAAGAAACAGCATATATAGTAGAAAGGTTAGGAAAATATAATAAAACATTATTGGCAGGTATTCATTTTTTAATACCTTTTATAGATAAAATAGCTTATGTTTTTTCATTGAAAGAAGAAACTATCACGATTCCAAATCAAACAGCTATT…	1122	789	-0.0123236
PF3D7_1364100	PF3D7_1364100	ATGTTTGCTGTAAACTTAAAAATTTGTATATTTTTGTCACTTGTTTCATTTTTGTTACAATGTAAGAATACACTTGCTAATGTAACTTTTGAACAAAAGGTACAGACAAATTTAAGTCATGATAAAAATGGAGATATAGTATATGGACACAGAGAATTTAAAGGAGGTATTTATGCATTTTTAGGATATGACAACTGTACAATAGAAGTTAATAAAACAGTGAATGGAATAGATTGGAATGAAAAAAAGGACGTAAAAGTAAGTGGTAATAATAATATTGCTGTAGTATATTCCATTTTTACAAGTGAAGAGAAGATGATATTAATTTTTAAATGTGATAATAAATTTTATATTACTAAATATGGAAAAGAATTTAAATGGTCAGATCCTAAAGTTATA…	2388	787.5	-0.0129779
PF3D7_0307900	PF3D7_0307900_e2o3-s1	ATGATACCTAAAGGTACAGAATATCAAGATAAGGAAAAAGAAAGCTCCATTCTTACGATTAATCAAAATGATAAAAAATATAAGAAAAAAAAAAAAAAATATTCAGAATTACAAGATTCTAATATAAGTAGTAATAATACCCTAACATCTAAGAGATACACGTATACATGTGGTATGGATAAAGAAACTAAAGAAACAGATGAACAGAACAAAAGGAGAAATACAGAAGTTGCTTCTATATGTAATGTGTGTAATGTAGAAACAAATGAGAAGCAGAGAAAAAAAACAAACAAAAAAAAAAGTGTGCAAAAAGATGATCTGGTTGAAGAGAATGCTTTATTAGATAATTTAATAATAATCGATGGAATAAATTTTGATGATGTTACTAAGGAGTGTAAA…	1500	785	-0.0133284
PF3D7_0522600	PF3D7_0522600	ATGGAGAATTTTCATCTTCATAGTATGATAAAAATGAACAGCACTGTGAGCTTACTCTTTGGGATTTTTTTAACAGTAATAGGATCAATATTTATGGCTATAGCAAATACATTCATGAAATTAGGTTTGAGTGATTCGAAAAAGAAAAAGTACATGTTTACTAATTATTCTTGTGATATGAAATGGTATATAGGATTTATTGTTTATTGTTTTGGATCCTTTTTACATATAATTGCCCTAGGTTTTGCCCCTGCCAGTACCTTAGCGCCCATGAATTCATTCGGTTTAATAGCGAATGCTATTGTTGCTAATATATATTTAAATGAGAAGTTAGGGAAAATAGAATTAATATCTACATTTGGAATATTTTTTGGTATTAGCATTTGTGCATGTGCTTCC…	1449	735	-0.0135997
PF3D7_0826100	PF3D7_0826100_s4	CGTGAATATAATAATAACTTGAATGATATGATAACCCAAGAGACCATAAATAATAATAGCAATGTTTTTCCTCTTACTATTAATAATAATGGTAGTAATGATAATAATAATAATGATAATAATATATATGGTGATTCGTGTAATAATAATATTTATCATAGTAATAACAAATTGGATGAGGAAAAAAATGAAGATATATTTTATAAAGACGATAAATACATTTTAGAAAAATTTCCATTCATGTTTGATTTACTCAAAGAAGCACAGAAGAAATCAGTACATGCACGTATTTATTATTATGATAATATTATGAATCCGAATAATAAAAGAAATATGATATTTTATATACAATATTATTTGAAATCCTTAAGAAAAAATACATTTAATTCTTATGAACAA…	2913	780.5	-0.0137249
PF3D7_0423500	PF3D7_0423500-e1o2	ATGGGTTCATACGGAATGGATGTAGATGATGCATACTTACATCAAGGACAATACGCAGCTCCTTACGATAATCAATATCAACAAGATGACGATACACCAAGCCCTCGAGGAGAAAACCATACACCGTTTGTAGGATATTTTAGTTCGCATTTATTAAGAACAGGTTTTTTTTTACAATGCGTATCATTAGTATTAATGTTTGTATTTTATTGGGCTTTTGGAGGTACAGGAATTTTTATTTTTGATTTATATGCTGGACCAGAATGTGTTAAAGTTTCAAGCACCTTTCATTTAACAATTTCTATTTTAATGGCTCTATATTTATTAGGTACATTATATATTGCCATGTTTCAAGTTTTTGTAGCTGATAATAGTAAATGGTGTCGTGGGTTTAGAGCA…	684	735.5	-0.0138173
PF3D7_1323700	PF3D7_1323700_e3	GGAACTGTATCATGGAGCTTGTCCCTTATATGTTTGATGGCCTCTTCGTACTATTTTGATGACCCTTGGATGGAAGAAAAGATAGGTGCAGGTTCGTCATGGATTTTATATTTTAGTTCAAGATTGATTGATGCATTTTGTTTATTTTTATATGGATCAGGATGTTTCTTTTTAGAAGTATATCATTCCGAAGGTGCTGGAGAAGCATGGGGATGGTTATGTGGAATGTGTTTTATAGCAACATCTTTTGTGGAAGTGTTAGCTTTAACATTATTTAATACACCTTTGTTTAGTTCCTTAGATTGGTTCTATTGTTTATTTTTAGGATTAAGTCTTTTTTTTAGTGTTATCTGGGGATTATTATTTGAACCAATAAGTCATAGATATGATGTAAAATTA…	534	794.5	-0.0140805
PF3D7_1011000	PF3D7_1011000-e4o4	AGGATGATAAATTTTAGCGATATCAGATCTTTACTATATGGAGAAGAACAACTGAAACGTGTAGAAACACAAGCAAATTTAATAAACGACAATTGTTGTTTAGCTCTACATTTAGATGATAGTGGAAATTGTATTCCTATTAAATTTGGGTCTGTGAAGGAAAAGAATCTCTTCATTTTTATTATGAAAGATTATAAAAAAAATTCG	207	734.5	-0.0146347
PF3D7_0831700	PF3D7_0831700	ATGAAGACAAAAATTTGTAGTTATATTCATTATATTGTTTTATTTTTAATTGCAACAACAACAGTACATACAGCAAGTAACAATGCAGAAGAATCAGAGGTTGCAATTGGTATTGATTTAGGTACCACCTATTCATGTGTTGGTATATGTAGGAATGGTGTAGTGGATATTATAGCTAATGATCAAGGTAATAGAACTACCCCATCTTATGTTGCTTTTACAGATACAGAACGATTAATTGGTGATGCTGCTAAAAACCAAGCCTCCAGGAATCCAGAAAATACAGTTTTTGATGCAAAAAGATTAATAGGAAGAAAATTTTCAGAAACAACTGTACAAAGTGATATGAAACACTGGCCATTTACTGTAAAAGGTGGTTCTGATGGAAAACCAATGATT…	2037	785.5	-0.014928
PF3D7_1472600	PF3D7_1472600-e2o4	ATTGATGATTTTATTAATGGGTATTTACAAGAAAAAAAATACTTTTATAGAAAAAGTGAACGAGCCTTACCAGATGAATATAACAACGGATATATAAAAATTATTGTCGCGGATAATTATGATCAATATGTTTATAAAAATGACATGAATGTTATTGTATTGTATTACGCTCCTTGGTGTGGACACTGTTATAAATTCGAACCTGTTTATAGAGAAGTAGGAAAAAGATTAAATTTGTATGCAGCCAAGTTCAAAAATTATAAAAATGATATTATTATAAGTAAAATTGATGCCGTAAATAATGAAATATATAACATACATATA	324	780.5	-0.0152046
PF3D7_0930300	PF3D7_0930300_s2	AATATTCAAAATAACATACCTGCTATGTATTCATTATATGATAGTATGAACAATGATTTACAACATCTCTTTTTTGAATTATATCAAAAGGAAATGATTTATTATTTACATAAACTAAAAGAGGAAAATCACATCAAAAAATTATTAGAGGAGCAAAAACAAATAACTGGAACATCATCTACATCCAGTCCTGGAAATACAACCGTAAATACTGCTCAATCCGCAACTCACAGTAATTCCCAAAACCAACAATCAAATGCATCCTCTACCAATACCCAAAATGGTGTAGCTGTATCATCTGGTCCTGCTGTAGTTGAAGAAAGTCATGATCCCTTAACAGTATTGTCTATTAGTAACGATTTGAAAGGTATTGTTAGTCTCTTAAATCTTGGAAATAAA…	2604	733.5	-0.015316
PF3D7_1444100	PF3D7_1444100_e10s1	AAATATACCTCTTTAATACACCATATATATGAAAATCATCTAACTATTAATATAAATGATTATTATTTAATAAACCTAAAAATTACAGCTATGTCAACAAATGTATTAATACATTTCTCTTTTTATAATTATGATTTTGGTAATCTTATCTTATTTCCAAATGTAGATAAAAATGAAAATACAAAAGTCATATGTATGGAGGAAAATTATCGGGACAGTTTTTCGTCATCTGATACATCTCTCTCTTCATTAATATCTACATATAAAATAAATGAGCTCAACGAGAAAAAAATGAAAAAGAAAAAAGAAATGGACTTGAAAATAGAAGAAAAGCGTGTTCAAAAGGGTAGAGAAAAAGAAAGTGAACAGAAATGTGATAAAGAAGAAAAGAAAAAGAAA…	2646	785.5	-0.0153674
PF3D7_1021100	PF3D7_1021100_e1o1-s1	ATGGAAGAAAAATCAGAGAATTTAATGATTAAAAGTAAAGAGCTTTGTGAGATATTTTTGAGGTCTTTAAAGAATGACCAGGGTAGCGTAAAATATTTGAATGAATGTAAAAATGTAGATATATGTGAATATTATGGTGTGTTTAATCTTGTATATTCGAATATAATTAATAATGATAATAACATGGTTATGTATAAAGATCATTTATTATTTCTCTCCTTTTGTTATATGAATAAATTAATTGAAAAATATTATAATATATATTCAAATGATGAGAAAATAAATATAAGAAATAGTTTTATAAATATTTTATTTTCATTACCAATAAATTATAATCATATTTTGGATAATGATATATTAAATTTAAAAGTAAAATCGAATGAGATGTTGAAAACAAAG…	1500	783.5	-0.0155622
PF3D7_1035300	PF3D7_1035300-S3	GAAATTCCCTCAGAGCTCCACGAGAACGAAGTAGCACATCCAGAAATAGTTGAAATAGAAGAGGTGTTCCCGGAACCTAACCAAAACAACGAATTCCAGGAAATTAACGAGGACGACAAGAGCGCCCACATTCAGCACGAGATTGTCGAAGTTGAAGAGATATTGCCGGAAGATGATAAAAACGAGAAGGTTGAACACGAGATCGTAGAGGTGGAAGAAATATTACCAGAGGATAAAAATGAGAAAGTACAGCACGAAATCGTTGAGGTAGAAGAAATTTTGCCAGAGGACAAAAATGAAAAAGTCGAGCATGAGATCGTGGAAGTCGAAGAGATCCTTCCCGAAGACAAAAACGAAAAAGGACAACACGAAATTGTGGAGGTCGAGGAAATCCTCCCA…	1230	793.5	-0.0157106
PF3D7_0311800	PF3D7_0311800_e3	TGCATGAAAAACTTTTATGATAACCAAATGAAAATGTTACAAGAACTGGGTGGTGAGAAGGAAGGGAATTTAAAAGAAGGTGAAGAAGAAAAAATATTTGAAGATGCACTAAAGAATTGCAAAGAATCAGAGGAAATTTCTAAAAAGTTATTAGTAGATGGTGCGAAAACCTTGTGGATAAATTTTCATAACCCTAATGTATCAAATGTTGATAATAATGAATGGATTGATAGTGATTTATATTGGCAATCGTTTATTGAAAAGCATTCTATATATAATTTGAATAATAAAAATTTACATCCAGAAGATGATGAAAATTGTACATTTGAAAAAAATGAATGGCATAGAAAAACTAATAAATTTAATGAGAGGAGTGATACACCTATATTATATGATTAT…	1584	787.5	-0.0157133
PF3D7_0202400	PF3D7_0202400_e1s2	GATACAGATGATTCAGACAAAGATGTAGAAACAGAAGTAGAAGAAACAGACGCAGAAGACAAAGAAGAAAACGAAGAGGGAACAGATGATGAAGAAGACAAAGTAGAAGAAACAGACCTAGACGACCAAGAAGAAGACGGAGAAGAAGATAAAGAAGACGACAAAGAAAAAGACAAAGAAGATGACAAAGAAGATGACAAAGAAAAAGACAAAGAAGATGACAAAGAAAAATACAAAGAAGATGACAAAGAAGATGACAAAGAAGATGACAAAGAAAAAGACAAAGAAGATAACAAAGAAAAAGACAAAGAAGATAACAAAGAAAAAGACAAAGAAGATGACAAAGAAAAAGACAAAGAAGATGACAAAGAAAAAGACAAAGAAGATAACAAAGAAAAA…	1812	783.5	-0.0171724
PF3D7_0109850	PF3D7_0109850-S1_C	ATGCTCGAGATGATTAACATCTTGGTCATCTTGATTATTACCATCACCCAGGTGAAGAAGAAGATCTTCCTGTGCAGCTGCTTCACCTACATCTGGATTCTGCTGACGGTACTCTGCAACATCCTGATCGTGAGCTACATGTACCACGAGAAGAACAAGAAGAAGACTAAGAAGGAGAAGAATATCGAGAAAGAGGAGAAGAAGTACAAGAACAAGAACATCTACACCATCCTTCACCCGTTCATCAAGATCGGCAAGTACTACGAGAACGAGAAGGAGACCATCATGTTCGACAAGAACAAGCGTAACTTCTTCAGCCTTTACCAGAACAACAAGATCTCTATCGTGAAGCTGTTCGGCTACATTTACATCAATAACATCATCCCGTACCTGTTCGTA…	1583	739	-0.0176272
PF3D7_0729900	PF3D7_0729900_e1s1	ATGGAATTAGAAAAGACACATTTAATAAACTACTTTTTGGAAATCTGCCCTACCGTTTTAGATTGTTCTCGAAAAGAACTTCAATCAGTTTTAATTAAAAAAGAAGAAGAGAAAATAAGAAAATTTCTGTTGGATAAGAATATTAATTTAATAGTTATAGGAAAAGAAGGTAATGATAATGTAGAAAGAGAAATGGATGATAAAGAGAATGATAATGTAGATATAAATATGAATGAAGAATATAATAGTATGCGAACATCCAACTTGGATAATAAATATAATAATTTTTTATTTGTAGAATTAATGATAAATTACAAATGTGTAACTAAAAGTATTTCGATTGCTTTTATGAAAAGAAATAAAGAAAACTTTTTATCGTTAAATGATAAAATAGATAAT…	2643	777.5	-0.0177425
PF3D7_0505000	PF3D7_0505000_e1o2-s4	TACTACAAACAGAATTGTAATTACTGTTTAGATAAAAACATGTTAAAGGTAGGATATAGTTTAAAGTTTCCAAATTTGTTATTTGAAAAAAGTAAAAATGTAGAAGATGTAGCATGTAGAAAAGAAGAGGATTACGAAAAGGATATTAAAAAACCTGATTTTGAAGAAATAAAGGATAATAATATTTGTGTTTCGGGAAATGTACAAAATGTACAAGAGGAAGACAATAATATTATTAAAATTATAGTTAATTTAGATATGGATAATGATGAGATTGTTAATTATCATTTTAATTTTCTTTTAAGTTTAACGTATTTACATTTATATTATAGATATGTTAATGTTACCAATATATTATTTTTAGAAGATTATAATAAAGATAAGACAATATTATCTCTT…	1500	793	-0.0181202
PF3D7_1021100	PF3D7_1021100_e1o1-s2	AATTTAAATTTCTATGATATAGAACATTATAATTTTCAAAAGATATATATAAAAATGATTATGAACTTATCTTGTATACCTATATCAAATTATTTACATAAAAAAGAAAATAAATTAAAATGTCTACATATATATATAATTAATATATTTAAAAATATATATCATCCGAATATGAAAATATTAATTAATATATTAACCATATGTAAAAACATATTCGATAATAATAAAGATTTAATATATATAAATAATAAATATAATATAGAAGAAAGTAAAATATATAACATATATAAAATCGATAGAGAAAATTTGTTGAATGAAAATAATGAAAAGGATTATAATAATAATCAATTAATAATATCATGTGATGATTTAAAAAAATTGTTTATTTTGATGTTTATA…	1500	731.5	-0.0186396
PF3D7_0919400	PF3D7_0919400_e1s1	ATGAAACATTTTTGCTTTAATAACATTTTGTATATTTTCATAATATACATAATATTTCTTCTTCATCTTAATAATATAATATTATGTGAGGGCGCAATATGGGAAGGGATAAGTAAAGACGAGATAAGGAATGTAAAGCATTTAACACATGAAGTTGAATTACAGATATATAGTCAGCATACTCAGAATTGTATGGCTTTATTTTGTAATGAGAAAGAGAGTAAATGTAAAAATGTTTATAAAGAATTTGTAAAAGCATCAAATGAATTAATAGATAATGATGTAGTATTTGTTTATGTGGATACGATTAGTTTAGCAAAAACAGCTGATAATTTTGAAATAAAAAATATACCTAAAATTTTAACTTTTAAAGATTTTGATCCAGAAAAGGGGTATACA…	927	782.5	-0.0190161
PF3D7_0310200	PF3D7_0310200_e1s2	AAGAATTATTTTGTAAATGATTATATGCATATCATAAACAATCTTAGTGATCATGAAATGAATATAAATATGATGAAATCACCAGGATATAATAACTTATTTAAAGATGTCGAACATTTTATACATAAAAGAGATTTTATTAATTTAAATATATTAAAACTTATTAAAGAAAAAATTATACAAGTGTTACAAAATAATTATAAACAAGTATGTGTTTTTTGTAAAAAGACGACAGGAATAAAAACCAAATGTATGTTCCCCTCGTGCTCGACATATTTTCATATATATTGTTATTATAATAAATATATGCAGCATGTGAGGAAAAAAAAAAACGACCTTCAGTGTGCTAGCCAAAAAAAAAGTAGAAAGAATCAGCGCGCAGCATCTGTGAAAAGAAGA…	2775	731.5	-0.0190428
PF3D7_1108600	PF3D7_1108600_e1s1	ATGATGAAAATAAATTTGTACAAGTTGTTATGCTTCATATGTGTAATATTTTTGTTACATAAAAATGTGGTAAGATCAGGTGATAACATGAAATACAATGATATGAAAGGATTAGATGATCTTAGTAAGTTAAATGATGATCAGGTGAAGGATATTTTAGGATTAAAAATAGATGGAGCAAAAGAAAGAATAGAAAAATTATTTCATTTGATAGATAAAAACAATGATAAAGAAATAACAGAAGAAGAATTAAATACTTGGTCTAGCTTTTTAAAAAATGAAATATTTTTAAAACAAGTACAAGCCGAAATGGGACAAATAGATTCTGACAAGGATGGGTTCATATCTTTAAACGAATTAAATGATGCATTTGCACAAAATTTAGATGCTAAAGAAGTT…	1029	782.5	-0.0193555
PF3D7_0910600	PF3D7_0910600_C	ATGCTCGAGATGAACTTGTTGGCCATCTTCCTGACGAAGTACGTTGAGGACGTAATCTTTCTCTGCAACGCGACCGACCTGAACAGCTACTCATTCATTAAGAAGAAAGCATTCAAGGAAGCGGCTTTCTTCGTAGCCCGTACGATCCCGTCTCGTATCGAGTACAACACGAAGGAGATTATTACCCACGAGAACAACACGGTGTTTGCATTCAAGTACGAGGATAACATCTGCCCCATCGTCATTGCGACCGATGACTACCCAGAGCGTGTGGCCTTCTACATGATCAACGAAATCTACCGCGACTTTATTTCGACGATCCCGAAAGAGGAGTGGTCTTCAGTGAAGCAGGATAACAAGATCTCATTCAACCTGTACACCTACCTTACCAAGTACAAA…	680	783	-0.0195777
PF3D7_0307900	PF3D7_0307900_e3o3-s2	GTTATTTATAAAAATAAAATATATATGTTAAATAATCATGATTATATGATTGAATTTTTAAAACATCCTAAATTTTATGCTAGCAAAAAAGTTAAAGAATCAGTTTGTTTTTCTCTGGTAATATATTTTCCTAATATGGATATTCAAAAAAAAATCATTTATTTATTGGAAACATATGAAAAATTAATACATATAGATATAGGAAAATATTTCAAACAATATTTTTTCTTATCACACCAAGATAAGGAACAACATAAGAACAACATGAAGAGTAATAATAATGACGATGATGTAGATAACAAAATAGAGGATGCACACATTTTTGAAATACATCGTATTATTGAAGGGAAAACTATATCCCCTTTATTTATTGTTAGATATATATGTATACATATGAAG…	1500	795	-0.0196454
PF3D7_1324700	PF3D7_1324700-e1o2	ATGAGTGATTTTTCAAGGGATATGTCAAATAATGAAAATTCAAAAAAAATCGCATTGTATTCTATATTAATATACAAATATGAATCATCTAATCAACCAATTTTTTTAACATCGGCACTAGATTTATCTTCATTTCCTTTTTTTCATAGATCTTCATTAAAAGAACATATATATTTTCATGCACGTCTTGTATGTGGAAGGACACAAAAAGGTACACGTGAAGTTATAGAACTTGAATCGGGTATAGGTCATTTACATATTTATACAAATAAGGAAAATAATATTAGTGTCCTAGTACTTTCAACTTCGTCTTATCCATTAAGAATTGCTTTTTCGTTAATCGATTTAACACATAAATTATTTGCTCAAAAATGTAGAGGTATGTATGAACATGTTCGT…	624	781.5	-0.0197591
PF3D7_1249800	PF3D7_1249800_e5s1	AATTTAATACATACATCAACTAGAAATGCAATTTTAATAAACGGAAATAAAGATAATAAATACAAAAGAAGATTACAAATATTTAATAATTTAAGGAAAAATATGAATTACTATCCAAATGTACAAAGAAAATTAATTCATATGAATAATAAATATATTCGAAATAATAAATCAAGATTTAATAATGGGAATATAATTTATGGAAAAAATATGAATTACCCATTTCAACAAAATTTTCGAAATGGTACTTCATATATTACATCATCTAATAACGACATATCTACAAGGAATATTTTTTCGAACATTCCAAATTATATAACAAATAAAAATAATAGTAACTTTTTTAAAAGA	351	731	-0.0200059
PF3D7_1326500	PF3D7_1326500_e1o1-s3	AACAATCATGTAAAAGATAAAAATAATGTTGATGATAAAAATAATGTTGACGATAAAAATAATGTTGATGATAAAAATAATGTTGATGATAACAACCATGTTGATGATAACAACCATGTTGATGATAACAACAATCACCATTTTAATCATGAAAATGGGAATTCCTTAAGTAATAATAGTAGCAACTCTTTTGTTACCTTTTATAATAAACGAATAATAAAATATGAACATGATATGATAGCTAACAATTTGTTAGAACAAAATATTGATGATAGGGATAAAAGTCGTACAGCAAACAAATATGATGATAAAAAAGGTTTTTTTGTGTTTAATAAAAATATGCAAATAATAAGCTTAATAGATATATATAAAATAGTTTGGTGTTTATGTGTATTAAAA…	1500	786.5	-0.0208392
PF3D7_1113300	PF3D7_1113300	ATGGTAAAAATACAGAAGAGCTCAGGTATGTTTTGGAAGAGGAATAGTGAGTCCTCAAATTTGTACAATTTCTTGAATGGCTTATTTTGTATAGGTGGTATATATTTTTTTTTTATAATATTTGGTTATTATCAAGAAAAATTACCTCAATTAGGAAGAGGAAGTGATAGGTTTTATTATAATATTTTTTTAATATGTGTTTTATGTTTATCAAATAGTTTATGTAGTTTAAGTGCTATATTTTTTAAGAGTAGATTAAATAATGAAAATGTGATGAGTAGTTTAAAAAAAAATGTAGATAAATATTTTATAAAACAAATTATGTTAATATCTATTACATATTCTATAGCTATGATAGCTACAAATTATTCTTTAAGTCATGTTAATTTCCCTACACAA…	1029	779.5	-0.0209137
PF3D7_0624300	PF3D7_0624300_C	ATGCTCGAGATGAACTACCTGTCGTCGTTCTTTTGCCTTATCCTGTTCTTACTCTACCTGAACTTTTGTGCGTGCATGTGGCCGTGGACGAAGAAGTGGAAGGCCGAGAACCAAATGGCGATCATTAAGGATATGAGCAAAGAGATCCGCCACAAAGCGGAGACCTTACCGACTCCGCGCGACATCACCAACAAGATTCACCGTATCGACAAAGATATCATTGATCAGCTGAACAAGGACATCATCGACGAGGAAAACCTTAGCAAACACAAGGCGCACATTTGTCTGGAACCCAATTACGAGCGTGATTACAAGTACCTCTGCCCTGAGGGATGGATCAAGAACAAGAACGGTCAGTGTTGGGGCCTGCACTATGACGGACACTGCGAGTCTTTGAAG…	638	776	-0.0214646
PF3D7_1007000	PF3D7_1007000_C	ATGCTCGAGATGGCGCTGTTCCACTTCGTGAACTGCTCGTTAGCGACCTTCATCCCGTATTACATCATCTACGACGGCTTCAAGCTGAGCAAGAACGTGGGTGCCACGAAGCTTTTCTTCTTGGTGTGCTTCTACTATATCATTTCCCAGATCCTGAAACTGTTCGCACTGGCCTTCTGCAGCATCGGCTTATTTCAGTCGATGAATTTATTCAACATCATTTTCCAGGAATCCGCTAACATCATCGACCTTGCGGGCATCTACTACATTCTGAGCCATAAACATACTAACAGTATCAACCTTAACGAACGCATTCTTAGTGTGGGCCTTTCTTGGGGTTTCTATGAGTCCCTTGCGACTAACTTCTTTCCGTTCCTGATTGGTGGAAAGAGCCTGGAG…	863	782.5	-0.0225875
PF3D7_0703100	PF3D7_0703100	ATGAATAATAATAATTACATATTTGAAAATGAGAATCCAATATTGTATAATACAAATGAAGGAGAAGAAAATCGAAGCTCATTAGATGAGTTAACAATAAAAGAACATATATATAATAAAAGTGATTTATGTGATATATACTATGAAGAAGATAAAATTAATGTAGACGAAATATTTGATTTATTAAGAGATATAAAAGATCCAGAATATTCTTATACATTAGAAGCTCTAAAAATTATAGAGAAAAAAAATATTCATATAAATTATGAAGAAAAATTAATTACAGTATATTTTACACCTACTATACCAAATTGTTCTTTAGCAACACTTATAGGATTAATGATAAGTATAAAATTACAATATTCATTATGTAATAATTACAAAACGAACATTTATATA…	540	780	-0.0237386
PF3D7_1012500	PF3D7_1012500_e1s1	ATGGAAAATATAAAAAATGAACAGGTTATGAAATTCCTAGAACTGTGGAATATATTTAAGAAACCCCAGTATTTAATTGATGAGACAATAGAAATATTAAAAAAAAACGATGAAGAAGAATTAAAATGTTTGTTTTTAAAAAGATTAAATTTTGGTACAGCTGGATTAAGAGGTAAAATGTGTGTAGGTTTTAATGCCATGAATGTAGTTACTATAATGCAAACAACACAAGGATTATGTTCATATTTAATAAATACATATGGTTTAAATTTATGTAAAAATAGAGGTATAATTTTTGGATTCGATGGTAGATATCATTCTGAATCTTTTGCTCATGTAGCTGCTTCTGTTTGTTTATCTAAAGGATTTAGAGTGTACTTATTTGCACAAACAGTTGCT…	1779	789.5	-0.0238128
PF3D7_0910800	PF3D7_0910800	ATGAATGTATTCACAAAAAGAAGCTTCTTTTCCTTTTTTGTTGGATCCCTTGTAGGACTAAGTTTTAGTTATGTTCTAACTAAAAAGAAAAGTATAAACGAATTTATAAAATATGCAATAAAATATGTAACACATAAAAAAGGGAAAAAAAATAAAAATAATAATAATAATAATAATAACAGTATACCTGACGAATGCCCAGGTTTGGATAGCGAACATGCTGGGAAATCTAAAGCGTGTGAAGGATGTCCAAATAGGAAAATATGTAATGATCCAGAATTAAAAAAAGAAAAAGAAAAAGAAAGAAATCAAATATTTAATGAGGTACAAGAAAATTTAAAAAATGTCAAGTTTAAAATTTTGATATTATCAGGTAAAGGAGGAGTAGGAAAATCAACA…	1341	783	-0.0241972
PF3D7_1413900	PF3D7_1413900-e2o3	AAAATGAACAATGCTAGCAACTTTTCTTGGAGAGAAGAGAAAAGTTCTTTAGATATTACAAATATGTACGAATTAGATGATGATAAAGTATTTGACAAACAATATGATAAGGATGATATTTTTTATTCCTTATTATATAATATCATTGAAAATAATAAAAATCAAATTGATTTAAAAATACCAAAAAAAGAATTGTGTAGAAGGTTCGATTGGTCGAGATGGTATACAACAGCTATTCTTGAGAAGAACACAGAGGAA	258	781.5	-0.0244415
PF3D7_0307900	PF3D7_0307900_e2o3-s3	AGTGACGATAAATTTGAGAATATGATAAATTCAAAAGAAATAAATATTAAAGATTTCAAGTGTGTAGACAAAAATAATGATATATGTCTTAATTTGAATGAATTAAATAAGCAATCATATAACTCAAATACTACAGAAAAGTGCATTGATATACATGATTTTGATTATGTAGAAAACAAAGATGTGCACGACAAAATACATGAGGATAGAAAAGAATATTGTGATGAAAGTAAATTAAAATATTTACCAGCAGATGATATAAAAAAAATGAGAAGTTTTATAAAAATAAATAAAAAAAGTAAAAGAGAGAATTTTTTAATCATATCATATATGAATGAAGAAATATATTTTTTAATAAAAAAATTAAAAGTAGAAATTATAGAGCCTTCCATAATATTA…	804	789	-0.0245212
PF3D7_0829200	PF3D7_0829200_e1s1	ATGGAAAGAATATTATCTTCTATAGGAAAATTAAGTGTTGTAGCAGGGGGGCTAAGTTTAATTCCATATACATTTATATATGATGTAGATGGAGGGGAAAGATGTGTAATGTTTAATCGTTTTGGAGGTGTGAGCGAAAATACATTTGGTGAGGGGAGTCATTTTTATGTGCCTTGGTTTCAAACACCATACATATATGATATAAAAATGAAACCTAAAGTAATAAATACCACAACAGGTACTCGTGATTTACAAATTGTAACAATAAGTTTGAGATTATTATTTAGACCTCATACACAACATTTACCATATTTACATAGTACCCTAGGACCTGATTATGATGAAAGAGTTTTACCTTCTATAGGAAATGAAGTACTTAAAGCTGTTGTGGCAAAATAT…	816	775.5	-0.02484
PF3D7_0936600	PF3D7_0936600-e1o2	ATGAAAGATCAGATTGAATCAAGTTTATATTCCCAGAGGACCAAAATTAGTGCTGAGGATAAGGATTCATTTAGTTGTAGAAAATCTAGTCCTTTTAACAAAGAGACTAGGAAGGAAAAAAGTTTGAGTGTGTTTTTTTCTTCTTGTTCGAGATTATCCCTTTTGGGGCTGTTATGTATATTTTTATTG	189	729	-0.0249801
PF3D7_1023100	PF3D7_1023100_e1s2	AGTGTTGATAAAGATATGTCTGATATATATAATAATATTTCTACTCTTCATAATAATATTGTATCTATATTAAATGTAACCAGTAACTGGGTTAAGAAATCTATTATTGAAAAACGGAAAAGGAATGAAGATATATATACATATTTAAATAATTATAAAAATAATATGTCTATATTAAAAGGGAAATTAAATGATGATTTTAAAAATATCAATATGAATATTAAGCAGTCATATGATATTTTAAAAATAAAGAAAAATAATATCATGTGGAAAAATTATTTAAAATTTTTAAATAATATAATTATAGATAAATTAATACATTTAACCAATTTTTTATTTAATAATTTATATGATGTTATGAAATGTACAAAAAGAGATGAACAATTATTTATTATAAGA…	2892	728.5	-0.0251345
PF3D7_1319900	PF3D7_1319900_s2	GAAGAAAATATTAACACAAAAACAAATAATGTGGAGGAAAATATAAAAACAAATAAAGAAAATATTAACATTAAAGGAAACAATGTGGAGGAAAGTATAAAAATCGTATATAATAAAAATGTGGAAAATAATAAGGCTCAGGGAAATGAAAATTTTGAACATACGAATAAAAAAGAAATAATATATATTATGAATGATCCTATTCAATCTAACACCACATATAATTCCGAATCATATGAATCTATTTCAAACAATTTAGATGAAAGTAATTTGAATAATTATACTTATGATGATGATGAAAAATATGATACGGAGCAAATTAACACATTTACAAAAAAGTACCCTAAAATGATGAATATGAAAATAGATAAAAAAAATAAAATAATAAATAATAACGAA…	2253	788.5	-0.0252443
PF3D7_0722800	PF3D7_0722800	ATGCGCCTCGACTTATTTCTGCTGTTCTGCGTCTCTCCGTGCCTCTACACGTTCTTCGTCAAAGGCCACGACGAGTACCAGGGCGACGTAGAGAAGATTAACATGAACGACAAGAAGGGTAACGTGAGCATCCACGACTACTTGTACAAGATCGGTGACGAGGAGAAGACCAAGGATCGCTATCACAACAAGCTTAACGACAACATCACCGAAGACGACGAGCACAACACCACGTTGTTTCCTAAGGCAGAGGAGCTGTACACGTTCCTTACCACCGAGGAGATGAAAGGCAAGAACCGTAACATCTTCAACCATCTGAAAGGCTCGGTGATTAAGAACAAGATGACCAAGGCTACCTTCCTTGATCTGTATAAGAGCGCGATGAAGCATTTCGACATT…	1737	780	-0.0261998
PF3D7_1016300	PF3D7_1016300_e1s1	ATGCGACTTTCTAAAGTATCTGATATTAAATCTACAGGAGTTTCGAATTATAAAAATTTCAATTCGAAAAATTCCTCTAAGTATTCTTTAATGGAAGTCTCAAAAAAAAATGAAAAGAAGAATTCCTTAGGTGCCTTCCATTCCAAAAAAATTTTATTAATTTTTGGAATAATATATGTAGTCCTATTG	189	776	-0.0265914
PF3D7_1014300	PF3D7_1014300_e1s2	TTATATAATAGGTATAATAATAATATGAGTAAATATAAACAATATTGTAATAAAGACATATATTTTAAAAAAGTTATAGGAAAAAAGAGGGGAAAATGTACAAATATACAAGTTGAAAAAAACCCATGTTACAATTTAATATATATCCCTTCATTGTTGTGGATTTATAAAATATTAAATTATAAAAATAATTGCACATATAATATTATAAAACATTCCCATATATTTTGTAACGAATTAATGTGTTCATCAGATAAATCTAATAATTTATCTTATAGAAATAAAAAATCACAAAGTTATTCAAACGAAAAGAAGAATAAAAAAAGTAAAACCAATGATCGTGATGAAAGTAGTAAAAAGGAAACAAAAAAAAAAGATAATAGTAGTGGGCCTTATTCT…	2328	773.5	-0.0278449
PF3D7_0508200	PF3D7_0508200-e2o4	AAATGGAGCCACAGGATTAGGAGAATAAAAGTACAACGATTTAATTTAATGTTTTTTAATTTATTTTATTTTTCGCTTATGAGCATTTTTGGATTCGTTGTGTTGAGACATGAGACTTATTTCCCTACCGAGATGGGTGGGCAAGGAAAGCTTAGCGATTATTTTGTA	168	778	-0.0283734
PF3D7_0319900	PF3D7_0319900	ATGGAGTTAATTGATGCGGGATGCTTTATTTCTCAAATGAATGAACTTCTATTAATTGATCCTCTTTACATAAACTATGTTATTACAAATTATTTTAATAATTATATAAATGATAAGAATGTATTGTTACCTCAGGAAGGTTTAAATGGTGTATACTTTGAGAACGCCAAAGCTGGGTTATGGTCATCATTTGCCATAAGAGAGAAAACTTCTTTCTCATCTTATAATATGACCGAAGAAGGTTATGGTAATAACTCGACTTATAATATGTATTCAAATAAGGGTTATAATAATGAAATGGTTCATTCATTTATTTGTTTCAATAATTCAGAGTTAATGCATCAATATTTAACTATTGATAAAATTAATGAACTGAATTGGAAAACATATGAAGTGAAC…	942	787	-0.0289091
PF3D7_1324900	PF3D7_1324900_e1s1	ATGGCACCAAAAGCAAAAATCGTTTTAGTTGGCTCAGGTATGATTGGAGGAGTAATGGCTACCTTAATTGTTCAGAAAAATTTAGGAGATGTAGTTTTGTTCGATATTGTAAAGAACATGCCACATGGAAAAGCTTTAGATACATCTCATACTAATGTTATGGCATATTCAAATTGCAAAGTAAGTGGTTCAAACACTTATGACGATTTGGCTGGAGCAGATGTAGTAATAGTAACAGCTGGATTTACCAAGGCCCCAGGAAAGAGTGACAAAGAATGGAATAGAGATGATTTATTACCATTAAACAACAAGATTATGATTGAAATTGGTGGTCATATTAAGAAGAATTGTCCAAATGCTTTTATTATTGTTGTAACAAACCCAGTAGATGTTATGGTA…	948	774.5	-0.0295094
PF3D7_1406800	PF3D7_1406800-e3o3	ATTTTTGTAATATTTTGCAATTCCGGATGCTACTCTAATTTATTATTATGGCTTGCCTTAGGTGCAGTTTCCTTATGGTCATATTATTTCGAACCAGAAGTCAACCATGTCTCCCCAGCTTTACATGAAACAGAATTAACAAATGATGTTGAACAACAAGTAGAAAAATTTTCGCGCTATACTCCATATCCTCAAGATACCAATCAAAATGCTTATTATCCAGCT	225	726	-0.0296753
PF3D7_1326500	PF3D7_1326500_e1o1-s1	ATGATTTCGAAAGGTAATAAAAATGATATATTAAATAATAATGAAGAAAACAGGAATATTTCTTTTTTGAACCCCTATGAAAATTCCAAGATTTCTAAAGATAATTCTGCAGAAGAAATAGCAGAAAAATACTTAAGGAATAAAGTAAGTTATAAAACTATAAATAAAAATAACTATAATATAAATATAAATAATGATTATTATGATAATAAAAATATAAGTGAATGTAATAATTATGTATCTAATGATAATACACCATATTATTTAAATAATAAAAATGAGAATGTTAATTTAAATTATGTTGGAGCACAAAATTTTGAAAAGAAAAATGATTATATGTATACAAATTTATTTTTAAATACAAGTAAAATAACTAAACTAATTAATTCTTGTAATACT…	1500	778	-0.0296994
PF3D7_1327300	PF3D7_1327300_e1s1	ATGGGTATTAAAGATAATATAAATGCGGATCTATCAGACGATTCGAAAAAAGAAAGACAAGGACTTGAATTAACAGAAGAAAAAGTTCTTGAAGAAAATATAAATAAAATTGATATACAAGAAAAAAAAGAGAATAAAGAAATAAATAAAGGAGATATAAATAATGATAATGAAGAAATTGAGAATTCATATATTAAGGAAAATTTAGATCCATTAAATGAAAATAAAGATAATTCCAGTGCTAATTTGAACGGATTAATAACTAAAGAACATATCGTTTCATCGATTTCACCAACTGATGAGTTGAAAATTTCGCAATTGGATTCAGATAACAAAAATTTAGAGAATACCCTAATTAGAGATGACAAAGAAAATAATTTGAATAATGAAAATACTCAT…	2724	788	-0.0298196
PF3D7_1312600	PF3D7_1312600_e1s1	ATGAGAAATATTGTTCAGAAATACTTACAAAGGAATAGCACAAAGTTATTTAACAGAACAAGTGTATTCAATTTATATAAAAAATGTAATTTTTCTGGATACAAAATTTACAGTGACGGACTAGTTCACTCTGAATTTTCTACTGAGTTAAAAACTGTAAATGAAGTTATAAAAATGCCTATTTATAGAATATTGGATACGAATGGACATTTATTAGACGGTCATGAAGCGCCATTTAAGGATGAAGAAGTATTAAAAATTTACAAGGATATGGTTGAATTTTCTATATGGGATGAAATATTTTATGGAATACAAAGACAAGGTAGAATATCATTTTATATAGTTAATGAAGGAGAAGAAGGTTTACAATTTGGTATGGGTAAAGCATTAAGTGTTGAT…	1287	780	-0.0300653
PF3D7_1227500	PF3D7_1227500-e2o2	AATAAGAACGAGTTAGGATACCGGGAAAATGAAAAAGATGTGGGTCGTGAAAATAAGGCAATTTTTTTTGAACAGCATATGAGTAGAAGCAATAATAAAAACATGGATACAACACCTGGTGCAGATGAGAAACAAAATAAAAAAATAAATATTATAAACGATATGGAAAATAAGAAAGGGAAAGAAAATAAAAGTACATATGAAAGTATCGATGGATATACATCACAATATGAAAACTTATATACAAATATACAGCCTAATCAGTATAACAACGAATATACAGATCAATATAATTATCAACGTAATTATCAATATAATGAAAATTATAATAATAACAAGTTTTCTATAAAGAAAAAAGAATACGAAACATCCTTAGAAAAAATGAAAAACACTTTAGAC…	738	778.5	-0.0302861
PF3D7_0419500	PF3D7_0419500	ATGGTTAATCAAGATGATAAATTTAAGAAACCTAAAAATGAAATTTGGGAAAATGATGAGATATATAAAAAAAAAAACAAATGTGTTAATTCAACCAATGATAATTCTTTTATGAATATGAATGGAAAGAATAATTTTCCTTTAGAAGATGAATATAAGGATATATTTCAGATTAATAATTTTTCTAAGAATACTGATCATAATAAAAATAATGTGCATCTTATAAATAATCATAATATGAAACATAATAATAATTTTATAACAAATGAGGAATCAGAAAAAAACTCTCTCTTGTCAAATAAAGATTTAATTATTTTTAATTTACAAGATATTAAAAATGATGGTAATATGAAAAGGTTTGATCATACTAATAATACATTTCAAACAAAATCTAATACT…	1608	786	-0.0303695
PF3D7_1250300	PF3D7_1250300-e2o2	TCCACAATTTTTGGGAGCGTGTGCTCCATAGATTTAAAAATTGATGCAGATGATAATAAAAAATTCGCCTTTCTAAGAAAAGATAAGAAGGGAGAAAAGTGCCCAATATTTTCAGACGGAGAAGATATTAACGGAACAGCAACAATAAGTTTAAAGCCAGGAAAAAAATTTGAACACTATGGTATAAAATTAGAACTTATTGGACAAATAAATATATTAAATGATAAAGCCAATTCTTATGATTTCTTTTCTATATCAAAAGATCTTGAACCTCCGGGATTTTTAGTAGAAAGCAAACAATTCAAATGGAAATTTTCAGCTGTCGATAAACAACACGAATCTTATTTTGGTACAAATGTTCAACTAAGATATTTTGTTAGATTAAATATAATTAAAGGA…	885	725.5	-0.0307966
PF3D7_1147900	PF3D7_1147900	ATGCCTAGAACATGTAAAAATGGGCAAGAATGTAGAAAATATAAAGCATATGAAAATGTGGACGATAAACATGTTTCAATTATTCAACCAATTTTATTGGTTGGTATGATATTTGTGTTTTATATTTTTTACTTTCGATTATTTAAAAGAAGATATACAAGTAATGAAAGTTACAGAAGAAAAATGAATAAAAAAAATATAAGTAGTAAACCCGTTATTTCATTATGTTTAAATGATATTGTCATTAAAATTATTGGTAATAATGCACACATTATGGAAAATTCAGTAGAACCATTAAATAAATTAAGTTCTATTTCTGAACTTTTTGTTATTGCACAAATATCAAATGATGTTCAAGAAAAAAATATAATTGATCTCTTTAAAAAATTAGGATTATTT…	651	776	-0.0310733
PF3D7_1108700	PF3D7_1108700_e1s1	ATGAATGTTACAAATGTAGTAAAAAGACGAAAGAAGTTATCTTATTTTCATTCACTTCTTCTGATAATATTTTCTTTTTTTCTATCATGTGCTAGAGGCATGGATTATTACAAAAGACTGGGCGTTAAACGGAACGCCACAAAAGAAGATATTTCAAAAGCTTATAGGCAGCTAGCTAAAGAATATCATCCAGATATAGCGCCCGACAAAGAAAAAGATTTTATAGAAATTGCAAACGCCTATGAAACGTTATCAGATCCTGAGAAAAGAAAAATGTATGATATGTATGGTGAGGACTATGCCCAAGGAGGTATGGGAGGAGGAAGTCCCGGGAGAGGGGAACATGCACATGGTTTTCATTTTGATCAAGATGTAGTAAATGAAATATTTAAACAATTT…	1620	779.5	-0.0312656
PF3D7_0933600	PF3D7_0933600_e1s1	ATGTGGAAAAGAAAAGTGGTAAACGTCGTGTCATGCATTAGGAAAAATAGCAGACCTTTTCTTGGGTACCGATCAAATTATAGTACTTACAATTTACCTCAAGAAATAATAAATCAGCCTATAACACGAGTAACTGAATTATCTAATAAATTAAAAGTAGCTACTGTTCATACAAATTGTGAAATACCTACAATTGGTTTATGGATAAGTAGTGGTAGTAAATATGAAAATAAAAAAAATAATGGTGTTGCTCATTTTTTAGAGCATATGATATTTAAAGGTACTAAAAAAAGAAATCGAATTCAATTAGAAAAAGAAATCGAAAATATGGGAGCACATCTAAATGCTTATACGGCTAGAGAACAGACAGGATATTATTGTAAATGCTTTAAGAATGAT…	1452	776.5	-0.0313459
PF3D7_0719200	PF3D7_0719200_e7s1	GATATGAAGTCTCTAAACATTTTAATAGACAGCGATAAAAGAGTTAGACTGTGCGATTTCGGAATATCTAAAGTTCTAGAAAATACTTTAGATTATGCTAATACCTTAATAGGTACTCCTTATTATTTAAGTCCAGAATTATGTAAAGATAAAAAATATAGTTGGCCTTCAGATGTATGGGCAACTGGTTGTCTAATATATGAACTAGCCACTTTTAGAACCCCTTTTCATTCAACCAAAGGAATACAACAATTATGTTATAATATTAGATATGCTCCA	279	771	-0.0316586
PF3D7_0909600	PF3D7_0909600-e3o3	ATCTTTAGGTCGGAAGATGTCTCGTCCTCCGATATTGAAACGATAGAAGACATCATAGAAAGAACGTGGGAAAGAGAAAATAAAGAATTCATTTTTACAACAAAAAGATTAATTAAACAATACACAGACAGTAACTTATTCATTTTACAAATTGGATTGAATAGTGTAGCTCCCTTAATTCTTGATAAACCCGATAATGGTATATTTATTGAAGAAGATATAGAAATATGTAAAAATTATTTTCTACATAAACCTAATAAATGTTTTCTATATTTAGAAGGCGTAGAATTTTATTGTAAAAAAAAAACAATAACGAATAATAAGAATGAAGGTTCATCTAATATATTCAAATCAAAAAAAGAAGATATTTTTGATACTCTTGATTTAATTTCAAAAATA…	1551	772.5	-0.0317958
PF3D7_0210200	PF3D7_0210200-S3	TATAACGACGACTACAACGACGACTACAACGACGTGAACCAGAACACGTACGTGAAGCACAATAACCAGAACGAGAACAGTTCGCTGTTCATCTCACGCATCCAGATGGTGCTGGGCCTGCAGATGTACATCGGTGACAACTCTATTCATAGCGAGTTCCTGTGCGACACGTTCCAGCGCGTAATCCGCGAGGAAAAGATGATGAAGAACTCATCACAGGTAATCTTGTGCTGCCTGCGTTGCCTTTACTCGGACCTGAACCTTTTGGACATTCACTCCCTTAGCACGGACGAGAACGTGAAGAGCATCTGCAAGACCAGCCTGGATAACCTGTTGAAGCGTAACATCCTGACAACCCTGTCTTGGATTCTCCAGAACTTCAAGATTCTCAGCCATGAG…	1572	784.5	-0.0320128
PF3D7_1104700	PF3D7_1104700	ATGTTCTCGCTGTTCCGCATTGAAGACGTCCTCAACATCGAGACCCACTTCAAGGACAGTGAGATTAAGAACGTCATCGAGTTCCTGCTGCGCGCAAAGTACATCGACAAAGTAATCCAGAACGTGGGCTTCTGCGTTGGCCTGTACGACATTATCGAGATTAAGAACAAAGAGATCATCAAGGGCTCCGGTGAGATCCGCTTAAAAGTCATCTTCCGTTTAGTAATCTTCCAACCCTTCGAGAACGAGATCATTGAAGGCTTCGTGAAGTCCAGCGACAGCAACGGTATCATCATCAGCCTGGGCTTCTTCGAGAACATTCGCGTGAACTCTGCCAACTTAAAAGAACCGAAGGAGTTCGACCGCGAAAAGAAAGAGTGGTATTGGACGTACGAGGGG…	558	775.5	-0.0322488
PF3D7_1446900	PF3D7_1446900-e2o3	ATACGTAAGGCGTTGGTTCTTACCATCGTGATTGTGTTATTAGTAATTGTAGCTTCGGTATTTTTGATACTTCATTTTATTAATTCTGCAAAAGAAGGGAACATATTTCCATATGGGATAGGGATATACACATATAAGGTGCTGAATACATATGATCATATTCATGACCCTTTAGTAGGAAAACATATAAAGAATGAAAATATTTTGAATATAAGAAGAGATGATAAACATTTTCCATTTACCCAAGGGTTATTTTTTTCAAATAATGAAACCTTAATTGAATCAACTGGATTATATAATGCAAGTTATTTAAGAGAGTTTGATTTATTATCTGGAAAAACTATAAGATTTCATAATTTAGAAAGTAAATATTTTGGAGAAGGTACTACACTAGTTATT…	867	776	-0.0324381
PF3D7_1038400	PF3D7_1038400_e3s1	GTTGTACCAGAAGTTGTTGAAGAGGTTGTACCAGAAGTTGTTGAAGAGGTTGTACCAGAAGTTGTTGAAGAGGTTGTACCAGAAGTTGTTGAAGAGGTTGTACCAGAAGTTGTTGAAGAGGTTGTACCAGAAGTTGTTGAAGAGGTTGTACCAGAAGTTGTTGAAGAGGTTGTACCAGAAGTTGTTGAAGAGGTTGTACCAGAAGTTGTTGAAGAGGTTGTACCAGAAGAACTA	234	784.5	-0.0324482
PF3D7_0520400	PF3D7_0520400_e1s1	ATGAAGGAAAATTATATGATTAGACACTTATTTAAGAAATATGGTTTAAAATGCTATAACAGTATGAGTAAAGGGTTGTTAAGTAATATAAGAAATGGAAATTCTATAGTGCTATATGAAAAAAATGTAAATAAGAATTTAATGAATTTATTATATAAAAAACATTATAACACATATAAAAATCGAGTTTTCAATTCAGCTATGTATAATAATACACCTTCGAATTATATGAACAATCCAGAAAATAATAATATGAACCATTTACAAAATAATTCTAATTATAAATATGAAAACCCAAATAACTATTATCAACCAAAATATAATAATAATCTAAATAATGAAACTAATGAAAATAATACGACGTATCAATATTTCAGTATATTCGGAAGTACAGCTATG…	903	770.5	-0.0325351
PF3D7_0605600	PF3D7_0605600-S1_C	ATGCTCGAGATGAAAGACGAGCGCTGCATCTTCATCATTCTGCCGGACGTAACCAACGACTTAAAGGATGAAGAGGTCCTGGAGAAGCTGGAAGAGAAGAACTTCATCATCCTGAAGAAGAAGAAGGTCCATCTGACCGAGAACGAGATTAAAGAGATCTTTGACTTCACTCCGGAACAGTACAACGACATTAACGAGTTCTACGACTACATTGAGTCTGGCCTGAGCCTGATCTCGCTCATTGAGCACATCGAGGGCGACACGATCTCTAAGCTGAACTCGCTGACCAAGTCTACATCAATTCTGATTAAAGACGAGAAGTATTTCGAGTGTCTTGAGTACCAGTGTAACCTGAAATGTAAGAATGTGCCGTTCTACTTCTCAAAGAACGAATGGTAC…	1583	772.5	-0.0328941
PF3D7_1410100	PF3D7_1410100_C	ATGCTCGAGATGTACACCCAGTATGATATCGAGTACGAGTACGTGACCTGCACTAAGGGTTACACCTTTATCATTTACAGTCCGAACCTGTTCGAGAACGTTAACGCGAAGAGCTCAGACAGCACGAGCCCGTACACCGAAAAGAACAAGGAAGAGGACGAGCAGCAAGAGGAGCAGCAGCAGGACGAGCAGGAGCGCGACGAGCAGGAGCAGGACGAGATTAACAACGAGAACATCATCGTCCTGTTCCTTCACGGCCTGAACGGCAACTCCTACCAGTTCGAGAACGTATTCTACACCCTGATTCACTTCAATTACAAGTTCATTAGCATTGACTTCTACGGCCACGGTAACTCCTCGCTGCTGCGTAATGTGAACAAGTTCACTGAGAAGTTGTTC…	1130	772.5	-0.0330858
PF3D7_1449000	PF3D7_1449000_e3	GATGATGCAGACATCTTTGATGCAAGCGCATACGAGGGGAAAAATCTTGCACTTATACAAACAGAATTTATAAGAAAATTAAAGGACAAATTTAAAAATAGTAAATTTGGACAAAAATTAAAGAAACTTGGATCAAAGGCAAAGGAAAAGCTTCTTAGTTTGTATCAAAAACATAAAGGAAAACTCAGACATTTCTTTAGCATACTTCTTAAAAGCTTAGTCATTCCAATAGCTGTTCAATTTATACGAAAAAATTTAAACAAATGGAAACAAAGAACATTAGAAGCTACTCAGAAACTTGATGAACAATCAAAGAATATAGCACAACCAATTATAAATAGATTATATAACAGTTTCGAAGACAAAATTGAAGAATATTCTCAAGAAAATAAAATAAAT…	489	775.5	-0.0332082
PF3D7_0219700	PF3D7_0219700-e2o2	AATTTCAAGTTGAATCAAAACGTAAACATACCTTGTTCGTATAACCATAACCAAAAGAATTCAAGACAAATGTCTGAACGTTTACAACATCATCATGTCAAAAATATTACCTCTCAACCTTTGAGCAGTGATTTAAATGATTATTCAACAGAAGATGAAGAAGTGATGAATATCTTAAGTAATAATATGACACATAATAACAACTTAACTTCCAACAATAGTAATGTAAACCAAGTTGAAAACAGGACAAACGGTGAACATAGAAATGTATTAATTAATAATATGGATGATACAGATGAAATGAACAAAATAAATGAAGAACAATATGATAGATTATCTGATGAAGAAATTAATGATAAACTTGATAATTTAGATGAATCTGTTAGTAAAAAAGATATG…	741	783.5	-0.0333079
PF3D7_1437700	PF3D7_1437700_e1s1	ATGATTAGTAAAAGAACAAATTCTACCTTTCTTATAATAAAAAATTATTATAACGTATGGGTGGGATACAACAAGAATGTACAACATAATTCTTATTTTAAAAATAGTTTGGATTATATTTTCAAACCGAGAAGTATTGGAATTATTGGCGCCACTGAAAGAAAAGGTTCTGTTGGGAATTCTATTGTAGATAACCTAATAAAAGGAGAATCAAATTATAAGTTATATTTTGTAAATTCTAAAGGTAGTAAGATTTATAATAGACAGAGTTATAAAAGTTTAAAAGATATAAAAGAGGATAGTATCGATTTAGCTGTTATAGCAGTACCCCGAAATAATGTTGTAAATGTTATGCATGAATTAAAAATTAAAAATGTTCGTGGTGTTGTTATAATAACA…	2919	770.5	-0.0342362
PF3D7_1128300	PF3D7_1128300_e2s1	TATGCTAGGTTAAGTACCGAACTACTTCTCACACATTTAGTAAAGAAGAAACTAGAAGAAAGACAAATTAATGACCTTGAATTTCATACACACTCATATGGAAAGGAAGTTACGTGTTCTCTTCCTACAAACTTTGATTGTGCCTATAGCTATATTTTAGGATTTAGCTGCGTAGAAATGTTGCAACATAAATATAACGGATATATGTGTGTCATCAAAAAATTGAAGAATCTATTGTTGAACGTTAACGACATAGAAATATTAGGCATACCCCTTTGCCATATAATGAAAATAAAGAAAAAAAATAAAAATGTAGCACAAATAAACATTGTGGAACAAGTAAAATCTGCAGGGGAGAAAAAAAAAAAGATAGAAGAAAAAGATAATCCACAAGAAATA…	2148	782.5	-0.0352449
PF3D7_1037800	PF3D7_1037800-S1_C	ATGCTCGAGATGAAGAACAAGAACATCCTGCACACTGATAAGAAGGACAAGTACATCGAGCCGAAGGAGAACATTAAGAAGAAGAAAGAGGAAATTAAGAAGAACGAAATCACCAAGAAGCACGAGATTAACAAGAAGAAGTTGGACATCGATACCAAGAACAAGACCGACTCCGACTATAAGAACAAGCGCGACAAGGAAGGCGTAGAGAACAAGTACGTGAGCAACGAGATTAAGTATAAGACCACCGACACTGACAAGAAGAATAACCAGTTGAAGAACAGTATCCTGTTCGACGTGCACATTACCAACAAGGACGTTGAGACTAAGGGCGACACCAAGATCTCCCAGACCGACGTCAATTCATTCATCCGCACGTTCTTCCAGACCTTCTTGTTC…	1583	773.5	-0.0359082
PF3D7_0815300	PF3D7_0815300-S1	ATGAAAGTGCGTAAAACCTTCGTACTGATAATCGGCGGCGGCCCCACCGGCATCACGTCAGGATTATATCTGCAAAAGTATAATATCCCGCACATTCTGATAGAGAAAGACAAGTCGATTGAGAAGATACCGAAAGCGCACTATTATAACAATCAGACCATGGAAGCGTGGCGCTGCCTTTATCATCTGGATAAATGCTTTATGAACGAAACGGAAAAACTCGACTTGTGGAAGAACTTCCAGTATAGCCTGTCGATGCACAAAGAGAAAATCATTTCAATCTACAATAACTTTATTAACAAATATACGTACAAAAACACGTATTACGAAGATATCAGCCCGTCGAAGGTCACGCACCTGAGCCAATACAAGCTGCTAGGAATTTTGTACAATTACTAC…	1797	782	-0.0361038
PF3D7_0826100	PF3D7_0826100_s3	TGCAAAAAATACAATGATTATTATATAGATGATAAAAATATTCATATGCACACAAATTATCCATATGAATCCAAGTATGTTATGTGTGAAAGTTTAAAATCTTTGCTAGTTGTTATTAAGAAATTTTTTATTATGATTAATTTAGCTTGTCATACGAGACAACTAAAAATGAAGACAAGCCCTAATTACATATTTTATAACGTTATACAACAGAAACATATTTTATGTATAATTAGATGTATAACAAAATGTATGATGAATGTACCTCTTGTTAGTAAACCTATACAAGAAAATAGTTACCTAGAAAGAAATCATATTTATCATATTTTATCAGATCATATAACACAAGACAAAATTAATTATTTAAATAAATTAAATGATAAAAAAAATAAAACTAAT…	2913	786.5	-0.0361941
PF3D7_0604000	PF3D7_0604000_e1o1-s5	CTTTCTAGTGTAGTTAAGGATTGCTTATATACAATATTTTTGTCACAGCCGTATATTCATAAATCTCCAAAGAAATATACAACAAAAAGTTTAGTTAATTATTTTATTAATAAATGTAGATTTGTGAGGGATTATAACATTTTTGATGATTCAAATAATAAGTCGTTTACTGATGCGAAGAGTCACAAATATATGACCAGAGAATTTTATAAT	213	774	-0.0369503
PF3D7_1024800	PF3D7_1024800_e2s2	TTATATTCAAATGGAAAACAAGAAGATACTGACATGAAGGTTGTTCAAGCGTCTGATGGTATGATTACTAATAACAACATGATGATACACAATAATAACAATAGTGATTTTCTTCATGTACAAACGAAAAAGATAAAAGATAATAATTATTATAATATGTTATTAAATGTATGGCCTGAACAAGTTAAAAACATTGTTAGAAAACATCCAGGTTTTGATGTTGCTCTCGTATCTGAAGAAGATTATTTGAATAACATAAATAATGAAGATGATTATTATGTTGATAATGAACAAAACAATGATATTTTTAATTATGATGATAAAAATAATAATGGACATGGATATATCTTCTTAATCTTGTTAAACAAAAACTTTTTTGTTGATGAGTTTATGAAAAGT…	2331	773	-0.0371448
PF3D7_1403000	PF3D7_1403000	ATGGAATCCAAAAACAATGTTCTTCAAGTAGAATCTGTCGGAGTTAAGCTTCAAAAGAACGAAAACTCCAAGCAGACGTACACTAGCAAACTGAAAAAAATTGAGAAGAAATTCAATAAGAATAATAAGGACGGGAGCTCCAGCACGCTCATCAATAACCTTCATAACAACAACGTGAAGTGCAAAAATAAAAAGCACAACAAAGACGAAATTGATATAACGCCGTACCATGATCCTAAGAAGAAGACCAGCCAGTTACTTAACATATCGCACATCGATATTAAGAAAAAGATGCAGAAGAATGAGCAACAAAACGAGCAGCAGAATGAGCAGAAAAATGAGCAAAAAAACGAGCAAAAGAATGAACAAAAAAATGAACAGAAAAACGAACAGAACGAA…	1359	768.5	-0.037551
PF3D7_0922100	PF3D7_0922100_e3s1	ATGATAAAAATTTGTAGGAACAAGAGGCCATTGAGCAATGCATACGTTGGAAGTAATGCTTCAAAGGATAATATATCGTATAGTAATTTCTTACCCTTTTTATGGAAAAAAAATATGAGTTCATTAAATGTTGAATATGATTTGGAAATAACTGATGAATTATTAAATGCCTTTGATTTTCACGTACTTGAATTTATAAAAAAATCTATTAAGAATAATGAAGATTATAAAAGTGAGAAATTTAAATATCCAAATCTTTCTCTTTGTGAAGAATTATTTGAAGAAATGGAACAAAATAAGGACAAC	306	722	-0.0375649
PF3D7_1432400	PF3D7_1432400-S3_C	ATGCTCGAGGTTTACGAGGACATTAACATCCACAACTACGAGATGCATATCCAGATGATCAACCTGTCGAATTTGTACATGAAGCTTACGTACCTGAACTTCGAGATCTTCAAGTACCTGAAGGTGTTGGATCTGAGCAACAACGGCATCGAGCACCTGACCAACCTGACGTTACCGAAGCAGCTCAAGGTGCTGAACCTGCGCAACAACAAGATCTTCTGCATCGACTTCCTGCACGACAAGTTGGAAATCGAGATGCTCATTCTGGACAACAACGAGCTGAAGAACATCAACAAGGTTAACGTGCTGAAGAAGCTGAAGATCCTGCGCTGCTCACACAACAAGCTCTCAACAATCCCGCTTTTCCAGAAGTGCAGCCTTAAGGAAATGGACATTCAC…	1697	774	-0.0378307
PF3D7_0505000	PF3D7_0505000_e1o2-s1	ATGGCTAGTTTAGAAGAACTAATAGAGGAATATATATGTCCTGAAAAAGTCATGTTTACTTATGGGAAAGAGAAAAAGATTGAATTAATTTATGAAAAGAATAAAGATAAGGAAGAAAATAAAATAAGAGATAATATATTGGAAAAATTATTATTCTTGATAGAAAATGAAGATTATGAAGACTATGAAGAAAATGAAAAAGGCCATAGAGAAGAGACATATAAAGAATATGAAAAAAAGTCACATAGTACATATGTAAATAATGTTAGATCTTCAAATCATGTTCTTTCAAAGGATATATTTGATATGTGTCCATATAAAATAAAGAAGTGGCCTAATAATAATTTAATAAAAATAATTACGATTTTGAAAAAGTACTATTTTTGTAGTGAAAATATG…	1500	773	-0.0380756
PF3D7_0219100	PF3D7_0219100	ATGTACGATAAAAAATATGACATATTACTACTGGGGTGTACAGGATATACCGGTCAAATGGTGTTAGAATATTTTTTGGAAAATTATGAGAAAAAGATCAAAAGTGAAGAAATAAAGCTATTATGTGGTGTTAGGAATATAAAAAAACTAGACACCTTTCTGTATACTATAAAAGAGAAAAATGATGTTATATTAAAAAAAATAAATAAAAAAGAAATAGATATTAATATTTATGAATCAATTTTAAATTGTTGTAAAATATCAAAAGTAGTAATAAGTACGATAGGACCTTATATCTTATATGGATACAATATAGTAAAAGCTTGTGTAGAAGGGGGTTGTCATTATGTAGACGTGTGCGGTGAACATAATTTTATATTAAATATATATAAAGAATTT…	1278	722	-0.0381049
PF3D7_0212400	PF3D7_0212400_e1o3-s5	CAAATTGTTAATAAAATTATATATATGTATTCTTTACTTTTGAATATATATGCCAATTTCTATTTTATTAAAGAAATCCATGATATAGCAACGAATATATCGAATCAAATATTTTCACTTTTCGATACCTCTCATTTTTTGTTGAACCTCTTTCCAAAAAATTTATATAACATGGTTGAAGGG	183	772.5	-0.0384414
PF3D7_0314100	PF3D7_0314100_C	ATGCTCGAGATGATCACCTATAGCGAGTACTTCGACGATTACGTAGAGGACCTTAATCGCTACCTGCACAAGATCAAGCACAGCATTTACAACATCACCAACAAGGAAGACTACAACAAGACGCGCGAGTATATCTTCGAGGCGGAGAAGTGTATCAAACAGATTAACATCGAGATTAACTCGCTCCCTAAGGGCTCCAATAAGATCATCAACCAGATCAACACTTACAATTTGGACCTTAAGAAATACAAGAACATTGTTCAGAAGATGTCCGCGGACTACTATAGTGAGGAGTACTTAAACTCACGCCAGTACGACATGACCAAGAAGTACAAAGAGGGTGTGGATTTCTTAAAGGAATCAGAGCGCCGTGCGCAGGACATCGAGGACATTGGCTAC…	677	723	-0.0384582
PF3D7_0910100	PF3D7_0910100-S1_C	ATGCTCGAGATGTCTGAGTCCGAATTGCAGCAATTACAGGTGCTCTGTGAGGCCATGTACTGTGGGAATAAAGAGGAGCAGAACCAGGCGCACACGATTCTGTTACCGCTGGTTAATAACGTGATGAACGTCAGCAAGCTGAAGAATATCCTTGGCTCGACGAACCACGTGCACACACTGATCTTCACCACCAGCGGTTTGCTGCAGCTGATCACTAATGAGTGGAACAAGATTGATCAAAAGGAGAAAGACGAACTCAAGGAGTTCGTCATTAGCTACCTGTACAACAAGGGCGTTGATCTCCTGAACCTCTCTACTAACATTCTGGGGAACTTCGTGCGCTTGTACGTGCGCATTGTTAAGCTCTCGTGGCTGGAAAACACTAACTACAGCTTAATC…	1583	775.5	-0.0385928
PF3D7_0215000	PF3D7_0215000	ATGTTAATTTACAATTTTTTTATTGTGTTAATTTATATATTCCAAACAGCTAGCTATTACACGAAAAGTCTTACTGGATCATCGTATTCTGAAATATATTCAAAATCATTGAGTGATGATGAATCGGACACATATCAAGGAAAGGATTATGATAATAAATCTCCTTATTATATTTATTCACATCTTCTAAAAATAATAATAAAAAAGAATAAATTTAATGGAGATAAGAAACTCATATATGAATATGCAAATGGACATCCAAAAAGTTCATATACATATGATACATTTTTTAATAGAGTATTATCGTTTAGTGATGGTCTGAATACATATGAAGGTACAGGAATACAAGTAAAAAAATATAATGAGGAACAAAATAATGGTATGTTTAGATTGTTAGGT…	2655	772	-0.0387658
PF3D7_1365700	PF3D7_1365700-e1o3	ATGGCGCATATAGAGAATCATAAGAAGAAAAAATACGAGTATCTACCTAAAGATTATGATACGATATTTAACCCCAATGAAAAAGAAACAGAACTTTTAAATCAACATTATAACTCTGGAATAAATTATAATTACGACACAAGTGTAAAACATGGTGATAATAATGATAATGTTTATAATAATAATAATTATAATGACTACTTGTCAAATAATCCAAGTAACTTTCAATATATGAAAAAAAATAAAAAGAATAAAACAAATATGGAGAAAATTAAATTAATAAATAAAATACCACTACATCAACAAATGAACAACGCAAATGAATATGATCATATAAATATTAATTATGATAGTAATGATGAATGTTTAGAAACACATTATGATTTTGAAAATAAATAT…	1011	782	-0.039256
PF3D7_0315100	PF3D7_0315100_e1s1	ATGAAGTATTTAACATTTAATAAAAATAACAGAGATGCTATTGATTTGAGTGAAAAACTAGAAGCTACTAAAATAGATTTATCGAATCCCTTATTATTACAATATAATTGGGTGATATGGGAACAAGTATCAGATAATAAAATAAAACAAAGTAATAATTATAAGGATTATACAAGACCACTAGCTAAATTTAATAGTGTTCAAAAATTTTGGCAATTATGGAATAGATTACCTCAACCAAGTGATTTACTGGCACAAAGAAGTATGACCAGATTTTCAGAAGATGGAATATTTCGTATTGTTGATGCTCTTATGATATTTAGAGATAATATACAACCTATGTGGGAAGATCCAGCAAATTCAGGCGGTGGTCATTTTGAATATAAAATATTACCTAAG…	681	771.5	-0.0395862
PF3D7_1444100	PF3D7_1444100_e6s1	GATAATGATTCTGAAGATATAAAAAATACAAACTTTAATGTAAACCATAAAGTAATACAAAAAAGCTTTATTAATAAACAAGAATTATCTGATGAAAATATCGTTAAAAATGAATTATACGGAAATGAAGATTTGTATGATTATGAAACTGACGAATATTATGTTAATGAAAATAATGATAATAACGATTTGAGTGATAATCAATCTAGTCAAAGTGATTTTTATGAGGAAAAGTTTCCAGAAGATATGGTAAATATAAATGATGAAAAAATAAAAAATGAGCTATGTACATATAGTTTAAACAATTCAAATAAATTCCTTCATTCCAATTCTAATTACGTAAGTAGAAAAAAGGAGGATGATTTACAAATTAAAAAAAATAAAATTATAAAAATATAT…	1779	772	-0.0399469
PF3D7_1222300	PF3D7_1222300_e1s1	ATGAAATTAAATAACATATATTCTTTTTTTTTCCTTTTTTTTGTGTTATGTGTAATACAAGAAAATGTAAGAAGGGTCTTATGTGATAGTAGTGTTGAGGGTGATAAGGGACCTAGTGATGATGTGTCAGATTCTAGTGGGGAGAAGAAGGAAGTAAAAAGAGATAGGGATACATTAGAAGAAATTGAAGAAGGAGAGAAACCAACTGAATCGATGGAAAGCCATCAATATCAAACTGAAGTAACAAGATTAATGGATATTATAGTTAATTCTTTATATACTCAGAAAGAAGTATTTTTAAGAGAATTAATATCTAATGCAGCTGATGCATTGGAGAAGATTAGATTTTTATCTTTATCTGATGAAAGTGTATTAGGAGAGGAAAAGAAATTAGAAATA…	2463	775	-0.0403484
PF3D7_0904100	PF3D7_0904100-S2_C	ATGCTCGAGTGTTTAAACCTGCCGAACAAAGAGCATATTAAGACGTACATGAAGGAGCAGAAAGAGGGCACTATGGAGCAGTTGAAGATTAACATCGAAAACAACGAGAAGCTCAATCAAGCACACATGAATAATCAGAAGAACTACGAGATGAACAACAACAACAACAACGACGACGACGACGACGTCAACATCTCAAACGATAACAACGGCGACGTAAACATCTCGTCCGACAACAATAATAACAACAATAACAACAACAATAACAACCACTCCAACTACAACAACATGAGTAGCAACATCATCTCAAACGACGACATCAAGCACGAGCAGAAGAAGAACAAGAATGACGACGTGAATAATTCGGACATGCAGATCGACTTGCAGAAGAAGAAGAAG…	1583	771	-0.0403994
PF3D7_1351000	PF3D7_1351000_e1o4-s4	TGTTCAATTCTTTTGAAATATAAATATGTATATAAATATTTTAAAAAATATTATTATAATAAATATGTAAATGTTGATGGATGTGATATTTTTTTAATACAAGAAAAAAAGGATAATACATGTGAACTTATTTTTTATACTTATTATAATTATAATAGTTTCTTTTTTAATGAATCAATAAATTATACTCGATGTAATAATATTCGCGAAAAGTTATTAACAGTTGATATTCCTAAATATTTTAAACATGAGAATATTTTTTATTGTGACAAATATTATGTAGAAGAAAAAAATGAGACATTATTATTTCTTGAAAAAAAAAAAATCGAAAAAGAAATATGTAAAAATATATTTTTTAATATTAATAGTAATGAAACATATAATAAAAATATATTATTA…	1020	720.5	-0.0405543
PF3D7_0621100	PF3D7_0621100_e1o1-s1	ATGATTGGAGGAGAAGTGGTTGTTGAAAAGAATCCATCTAAAAAATTTTGTATTGCTGAAAAGGAGAGATTATGTGAAAGTGTAATATGGGAAATGTTACAAAGTTATTATAAGAAGGCTGCTATTAATGCATGGAAAGAAAATGTAGTTCCATCATTTGTTACTAGTAACAGTAAGCTAGCTAAGGATTATGCTCGAGTAATAATAAATTATATGAAAGATTGGTTTAATAGTAATGAATGTGATCGTAATGTTCCTATATATATATTAGAAATTGGTGCAGGTCATGGGAAATTCACCTATTTAATTTTGAGAGCTTTATCAAAATATAAGAAATATTTTAAAAGTATGAATTTACCTGAAAGACCTTTTGTATATGTATTTACAGATATCGCCAAA…	1500	771	-0.0412931
PF3D7_1348800	PF3D7_1348800-S3_C	ATGCTCGAGAAGGTCCACGGCAAGCAGCCGAACTACAACGATGTGAAGCGTAAAGTCTGCGAGGGGAAGGTCATGCGTATCTTCATCAAAGGGCACGTGGACTTCGTCCTTAGTAAGTGTAAGACCTATCTTGACGGCGATACGCAGAAAGGCGACATCGAGAAACTGAAAGAGAAGGTGAAGAACATCAAGGACGGCGAGGTTGATACCATCCTGTGCTTCGCCTATAAGGACGTCATCTTAAATGAGAACAACATGGAAGACGATCTTTACATTAAGAAGCGCGACAACGAGTACAATCTGAAGTACAAGGAAATTGACGATAACAACTACACATGCATCTCGATCCTTGTCCTGGAAAAGTACTTATCAAAGTACCTCTACTTCGACTACAGTATT…	1583	721.5	-0.0422211
PF3D7_1425700	PF3D7_1425700-e1o4	ATGCCAGCAAAAAGTAAAAAAGATATACAAGAGGAAAAATGTGATAGAATAAAAGAAGATAATAAAAATGAAAATGATTCTAATAATAATTTGTTTTTGAAAGAAGAAAAAGAAATATATACATATAAAAAACTTGATGAACAAAATAAAGAGAAGGAATGTAATGATAATAAAGATCAAGAAATAAATAACAAGAAAAAGAAAATAAATGATAACAAAAAAGAAGATATGGATAAACAAAATACAACACAAAATGAGGAAAAGAAAGATGAAGATAGTGTTTTTTTTAAAAGAATAATAAATGTTGAAATTACTCCAAATATAAAAAATTTCATAGAATTATTTCTTTTAAGTAGAGAAGATATATTAAATTGGTGTTCAAAAAACAATTCAATGTAT…	594	780	-0.0422601
PF3D7_0208800	PF3D7_0208800	ATGAAGGGTAAAGGTAGTTTTTTTTTTTGTTGGATTTTCTTAATTTCGTTTCTATATTTAATAAATGTAATAGTATGTAAACAAACTATTCTTAAGTTATCATATCAAATCAATTCTTTTAATTCTGATGCCAAAAAAAAGGAATGGACTAATATAGGGTCCTTTATTTTAAACAGTATCAAAATATATGATATATCGAATACTTATGTTGAAGAGAAAAGGAAATTTCTTGAAAAAATGAAAAATGTTGAATTACATTTTGATTACGTTTTATTTCAATTATGTTATGATGAAAGTAAATGTTTAGAAACCTATGTTAATAAAGAAAACATAAAAAATATAAATAATTTTGTGTTTTTATTAGGATTAGATAATAATTATACACCTTTTATATTAAAT…	705	780.5	-0.0426249
PF3D7_0914200	PF3D7_0914200-e4o4	CAAGGAAGTACATTACGCACATACTGGTTGCCAAAAGTATACCCCCCCGATAAAGCTCAATATCCAGACTTAACAGATGAGGAGAGAATAAATATTTTTCATGATGAAGTATCAAAAATCATGTTCAATCATATGAAAAAATATAATCCTAGAGCTCCAAAAGATGTGGATGATTATAATGACTGGCCTGGGTCCCTAAGATTTAAATTGGAGTATTTTCAAAATGCCTTAGGTAATGTGGCAACCAAACATTTAAATAAAGAAAAAAACTTAAGTGAAAAA	282	771.5	-0.0427356
PF3D7_0316700	PF3D7_0316700-e1o2	ATGAAAATGACCAAGTTGTATAAACATAAAGAAAAAGAAGATAGACCCAATACATCACTGAATAGTCTTAAAAGAATATCATCAAACGTTTTTGGTGAAAAATTAAATAATTTAGATGTTAGTAGAGTGTTTAACAATATAGATGATTATGTTAAAAAATATCCATTTTTAAATAATATAGGGAAAAAATTTGGTGTTAAGCCGTCATATATTATCGTACCATTTTCCGTATTTTTATTTCTTTCTTTAGTTTTTGGATGGGGTGCTGCAATTATTTGTAATGTCGTTGGCTTTGCTTATCCG	303	783	-0.0428065
PF3D7_1038000	PF3D7_1038000	ATGGGGTCACAAATTCAACCATCAAGATTTTTAGATAGTGCAATTTTAGCATTATTTGCCATGATAATATCGGCATCCTTCCTTTATATGTTTTCAGAATTTTTTATGATGTCACATGAATCCAAATTGTTTAACAATAAATTAAGTATGATCTTATCACGTTTATTTCCTTTTAAAAAGACTTTCGAGTACAACTTAACCCACATATTACTTCTTACCATATGTATCATTATCCTTAGTCTTAAACCTGATAGTGTAAGCAGCAAATATGGATTAAAGGACAGCAGAAAACCCCAAGGTAAAGATGACGCACATAAAGGTGATGAAGATCCAAATAGATTAAATCGTGACAAGAAAAAA	360	764	-0.0429368
PF3D7_0423700	PF3D7_0423700	ATGAAATTGAGCAACTTATTTTACGTTTTTGCCCTCCTCATCAGCATGAACGTTTTCGTTCCAGGATTTATGAACGTATTAGGGAAAAATGTTAATGTTGATAGCATAGTCATGAGTAAAATTGACGAGATGCAAAAGAAAAAACAACAACAAAAAATAATAATGATATCTACTGTTGTTACTGGTCTTGCTTTACTCTTAGGTAGTGCTTTAGGTTTTGGTTATCTTAGTAAATCTAATAAAAAACCAGAAGTATCAGGTGACGAAAAAGATGAAAGCAAAAAAGTAGATGCAGGAAAAAATAACAAAGAATCCAAAGCTGATAAATCTGAAGAAAAATTACACAAATCAGATGATAGAGAAAGTAAATCATCTTCATCAAAATCTACAGCAGTACCC…	408	777.5	-0.0443818
PF3D7_0603600	PF3D7_0603600_e2o3-s4	TCTATATATTTTAAAAGCATATTTAATTGTGGTAATATAAATGAGAAAGAAGAGTTAATAGCAGATAGTAAAAAAGTAAAGATGATATTAAAAAAATGGAACTTGTCAAATCTAAAGGAAGAAAATGAAAAAGAGAAACCAGAACAAAAAAATGAGGACAACCAATTCATTAATGAAAAGGATAAATTATATTTTTCTAATATAGAAAATAAAGTTTTTTATTTACATGATAATTTACTTTTATATGCATTAGATAATTTAACAATATCAAATAATGCTAAAGATAGGAAAATGTGTGAAAATATAAAAAAACAATATATTAATAAAAATGTAGCATCAAATGATCTTTTATGTGATTTTTTTAATTCTGGAAATTCAAAAATTCAAAAATTGAGTATA…	492	770.5	-0.0444781
PF3D7_0903800	PF3D7_0903800-S3	GATATCCGCAAGAACCAGAAGGACAGCTACGACATCTTCGTAAAGACCCAGGAGACGGTAGTGACCAGCTTAATCAAGCAATTCAACATTATCACCAAGAAGAAAGAGAACCACATTAACCGCTTAGAGAAGGCCTTCTCAAACGTCAAAACCACTACCGTGAAGATCTTCAAGGAGCAGTACAAGAGTACCAACATCAACGACAACTACATTATTATTGACTCGATCCAGAACAACAGCATGAACGGGTCGTCCAACTGGAAGATCGAGAAGTACACCAACGGCAACTTCTTCTCGTCAATCACCGAGAACTCTTTCATTAAGTCCGAGGACAACATCTACGGTAGCTACATCCTCTACCGTTACACGAAGCTGTACAAGGGGTTCATCTCGTTGGAC…	1614	778	-0.0445053
PF3D7_1034100	PF3D7_1034100_C	ATGCTCGAGATGATGAAGTGCACCTACATCTATTTCTTTACCTTCTACATCTTCACTTTGGTCATCTGCAACAAGGAAACATACATCACGCTGAACGAGTACGAGAAGAAGAACAATTTCTCCGTGCGCGTCCTCAAGGAGAGCTCCCTGAACTGCGGTCTGGAGATGGACGACGAGGCGGAGATTGAGATGCGCACCTTCTGGGTGAACATCATGCCACAGATCCTCAGCGACTACCAGTTTGGGTACGCAAAGCAAAAGTTTAAAGTGGGCGACCACAACATCGCGCCACTGAACAAGGGCCTGCGTGGTATGTGCATCGGCGAGCTGCGTCGCATCGGCATCTCGATCGGCAACATCGGTAAGATCTACTACGAGATCACGCTGATTAACTACACC…	503	721.5	-0.0445259
PF3D7_0918800	PF3D7_0918800	ATGCAAATTAAGTTTCCTTTTCTATATGTGATTATATACATTTTGTTAATAATAATAAAATTAAATCATGGTAATTCAAAATTAAATTACAATAAAACATATACTCATGGAAGAGTATATAACAATTTAGTACATACCGTAAATCAATATAATAAAAAAAGAAGCAAAAAGGAAATAGAAAATAAATACATACGTAATAAGAATATTATACTACCGTCTAGTAATACTGAAGGAAGAAATATATATATATCATATCTTAATAAACAATATAATAATAATAATAATAATAATAATAATTGTTATTATAAGAATAATACAAAAAAGCGTTATATTAAAAAAAAAAATTATAAAAATTTTTATTATTACATTTATTGCTTTAACACAAGTACCAATTCAACG…	1731	770.5	-0.0446038
PF3D7_0525400	PF3D7_0525400	ATGGGTGATGAAAATAGATATGTGCCTAATTCTTATTTACAAGATTTTGAAGAGAATGAAGAAAATAGAAATATGATAAAAAAGAAAATGAATGAATATTTCGCAAATTTAAACTGTGATTTAAAGTATCATAGGAATAGTTCAATATATTGTGGTATAGGAGGTATATTATATATGAATATGATATTATATGAGAATAGTAAAGATAAAAAATATTTAGATTATTGTGAAGATATTATTAGATACATGGATAATTATAAAGAAAGAAAGAATAGTATTACCTTTCTTGAAGGTTGTACAGGTATATATAGTTTATGTAGTATGATATATTATTATTTAGGGAATGAAAAATATGTAGAATATTTAAATATATTAATTAATCATTTAATAAAATATAAA…	1401	769.5	-0.0449456
PF3D7_1141600	PF3D7_1141600	ATGGTTATTCGATTTTTCCTGTTTGTCATTACACTCTTAGGCTTATGCATAAATATGGTGTGTTGTAATTTTAAATATTCGATTATATTACCTACTTACAATGAAAAAGAAAACTTACCATATCTTATTTATATGATAATTGATGAATTAAATAAACATGAAATTAAATTTGAAATAATTGTAATAGATGATAATAGTCAAGATGGTACTGCAGATGTGTACAAAAAGTTACAAAACATTTTTAAGGATGAAGAATTATTATTAATACAAAGAAAAGGAAAATTAGGGTTAGGTTCTGCATATATGGAAGGTTTAAAAAATGTAACAGGAGATTTTGTTATAATAATGGATGCTGATTTATCACATCATCCTAAATATATTTATAACTTTATTAAAAAA…	777	780	-0.0457788
PF3D7_1425700	PF3D7_1425700-e4o4	TTAATTTGTGGAATATTATTTTCGTATGTCACATTAATTTTGGAAGTTATAATTTTTATAATTATTAACGAGAAGATAGAAAACGTAAAGAAGAATCAAAAAAAAATGGGAAGTAATTATGAATTGTATGAAAGGGTTCATATAAAAGATGATAATGAGGACAAGAAAAAAAAAAAAATTATGGAAAACGTGGAATTAATTGAAGAGACTACAAAACCTTCAACTGTTAAGCAAAGAAAGAAAACA	246	764	-0.0460021
PF3D7_0405300	PF3D7_0405300_e1o1-s4	CCTAGATTTGATTTGATACATCATGATTTAGATGTTAATCAGACCAGATATATTTTATTAAATGAGACGAACCAAGATAAAACAATCTCTTGTACTTGTAATTATTTTACAGAACCTAATATTGTTTATACAGGTAAAATTATTATTAAAGTTGAAGAAGAGAAAATATATAAAACCAAAAAATTACAAACTGAATTTAATGATATTATAAATAATAAAAAGGAAATATATCACGAAAAAAAAATGAATCATATAATTAAAGAAAAGAAAGATGAAGACGAAAATGATATGTCATTTAATAAAAATTATGTTAATAATTATAATGAAAATTTTAAAATAAATGATATAAATAATTTTTACAATAGAAATAATCATCCCAATAATAATTATCACAACGAT…	1530	767.5	-0.0462452
PF3D7_0604000	PF3D7_0604000_e1o1-s1	ATGAAAAGTTTTTTGTTTAAAAATTTTAATAAATATGATCAAGAATATAAAAACAAATATAAATATCTTGATATAGGGAAAGACTGTTATAAAAATAAAAGCCTATTTTTACAATTACGTAATCATATTTCTATATACAAGAAATTAAAAGTAGAAATAGGTAATGTCCATAAAAATAAAGTATTTTACAATATATATCGTAATAACTTTTGTAGAAGTAAAAACATAATTAAAGCAGATTATATTTATAACAAAAAAAGAGTATTGTTCTCATCATATAAGAAATTATATAATAGAAATATAACAAAACTTATTAGGGTGTGTCAAAAAAGTGAGCACATTAAGAAAAAGAATATTTTGTTATTAGAAGGTAAATATAGAGAGAACAGGATATTTGAT…	1500	771.5	-0.047043
PF3D7_1107900	PF3D7_1107900_e1o1-s2	TTTTTAAAACACAAAAAAACATTTCCCTCTAAAACAAATCCAAATAAAGTAATTCCACAAGAAAAATTCAAAAAAAAAAAAAAAAACTTTCATACATATGATTCTTCTGATGATGATAGGCAGAAAAAAATTAATCTAGAAAATATTTTTCATGATGTAGATACATATGATACTAAAGATGAAGGAACAAAGGATGAAAATCTAACGGACCAGGATAAAACATCTCATCATATGATATATGAACAAAATATACAAAAGATACAATCTATAAAGTTAAGTGAAAATATTAATAAAAATAAAAAAAGAGATACATCCAAAAACAAATCCAAACAAACAAGTAAAACGAAAAAAAAAAAAAATATACCAGGTGAACACATGAACCATATGGGAAAGATGTCC…	1500	775.5	-0.0470431
PF3D7_1236900	PF3D7_1236900-e1o3	ATGGCTTCAAGAAAATTTTCCATATGCCTAATTTGCGATAAAGAGGGATTTAAATGGATTCCCTTTTTGATAAAGGAATGGAAAATAAAATATATGTATTGTAACGATGAGGAATTAAAAAATTGTTTAGTATCAACTTTTGGATTAGTTGATACCATAACAAATACAAATAACAACGCACTAAAATATATAGAAGGAATAAGCAACGAAAGTATTGATTTATTATTTTTAGCATTATCTACAAGTACATTTCATGAGTTTATTTTAGAATATGTGATAAGTCAAAAAAAGTTTTTTTATATATTTAGTTCCAATATTCCAACATGGAATATTAAAAAGTTTGAAAAATATAAATCTTTGATTAATAATTTTAATCCATATACAAATATTATATATGAT…	834	776	-0.0471096
PF3D7_1474900	PF3D7_1474900	ATGTCATCTGTGTCAACCTTACCTTATATTGGAAGCAAAATTTCCCTAATTTCCAACTCTGAAATTAGATACGAAGGAATTTTATATACGATTAATACTCACGAATCTACCGTTGCCTTACAGAATGTTCGTTCTTTTGGTACAGAGGGAAGAAGGCAACCAGATATTGCGCCATCTAATGAAGTGTACGACTTTATAATATTTCGAGGTAAAGATATTAAGGATGTTACTGTAAGTGAAACAGGAAAAAATATCCCAGACGATCCAGCTATTGTTTCTATGAATATAGCTCCTAGTTCTAAGAACAATATAACAGATAACTTAAATTATAATAATAATATGAATATTAATAAATCATTAAAGGTAAATAATAATTTAATATCATCAAATGATAGGAAT…	984	776	-0.0473612
PF3D7_0501300	PF3D7_0501300_e1	ATGTGTAGCGCAGCTCGAGCATTTGATTTTTTTACTGATTTAGCCGACGAACCAACACAATTACAGGATGCAGTACCAGAGACAACCGAAAAATTGGCCGAAGTAGTTTCGGATGCAGCAACAAATGTTACTGATGCAGTAAGTGATACAGCTAGTGGTATTGGAAGTTTAGTTGGAGAAGCAGCTAGTAGTTTAGGAAATTTAGTTGGTGAAGCAGCAAGCGGTATAGGAAATATAGTTGGAGGTGCAGCAAGCGGTATAGGAAATATAGTTGGAGGTGCAGCAAGCGGTATAGGAAGTTTAGTTGGTGATGCAGCAAGCGGTTTAGGAAATTTAGTTGGTGATGCAGCAGAGGCACTTGCAACTACCGAATTAAAAGATGTAATACCAGAAAATACT…	723	767	-0.0478941
PF3D7_0204700	PF3D7_0204700	ATGACGAAAAGTTCGAAAGATATATGTAGTGAGAATGAGGGAAAGAAGAATGGAAAGAGCGGATTTTTTAGTACATCGTTTAAATATGTATTATCAGCATGCATAGCATCATTTATATTTGGTTATCAAGTGAGTGTGTTAAATACAATAAAGAATTTTATAGTTGTAGAATTTGAATGGTGTAAAGGAGAAAAGGATCGATTGAATTGTTCCAATAATACAATTCAGAGTTCATTTTTGTTAGCATCAGTATTTATAGGTGCTGTGTTAGGATGTGGTTTTTCTGGTTATTTAGTACAATTTGGAAGAAGGTTATCATTATTAATAATATATAATTTTTTCTTTTTAGTAAGTATTTTAACGTCCATTACTCATCATTTCCATACCATATTATTTGCT…	1512	768	-0.0479101
PF3D7_1348800	PF3D7_1348800-S1_C	ATGCTCGAGATGATCGAGGAGATCACCAAGAGCCTGTTCCCGTACGACGCCAAGTTCTTTAAGGGCCTGTTTGATAAGTACATGAAGGAAGAGGACTACAGTAAGGACCTTAAGTGTCTCCAGAACAGCCGTAAGCTCATTGAGGAGATCATCAGCAAGGAGAACGGCCTGAACTTCTACATCGACGAGAACTACGACGAGAACTTCCTTAAGAAGTGTAAACTGCCTTACTTCAAGAAGCTTCTGAAGTACATTAAGTACATGGAAGAGCAGAAGCAGGACGACGTGAAGAACAAGAACGTCGAGAACGAGGACCTGATCGACGAGGACAACAAGAACGAGGACATTCAGGGCGACAAGAAGACGCCAAAGAAGAACGTCAGCGACTACTTCATCTTC…	1583	767	-0.0483946
PF3D7_1465000	PF3D7_1465000	ATGAAGGAAACAGATTTGTTATTAAAATTTTTGAAATATGGAAAAAAGAATATTATTAGTAAAAATAATTTAAATATAAATGGAAAATGTCCAAATATGCAATCCTTTTGTACCTATCTATTAGATAGTAAGAATATTATGAGAAATACTTTTATGGATAAAGGTATGTCTACTTTTTCTAATAAAAGTAGTTACTTAATAATAAAAGATATAGGTAAATATTTCTTTACAACTACATCGAGAGTTCATTTCAATATGACGACTAAAGATATTTCTAATAATAGTGTTACACGAGCGTATTCAAAAGATGTTTCCATATTTGAAAATCCAAATGTCATAATTCTTTTTGATAAGAATAGGCGTGAAACTATTGGAGAAAGAATATATAGATATTTGGAT…	834	776.5	-0.048716
PF3D7_1122600	PF3D7_1122600-S3_C	ATGCTCGAGAACGTAAATATTATTAAGTGCTGCTTGAAGATGTACCCCAAGATCATCGAGAGCAATCCCATCACGAGCGGTACGAAATTCAACGCGAAAGTTCGTATTCAGAACGAGCACCCCGTGAAAATCAACTACCGTACTAAGACCAAGATCTACCAGATCGATGACGTGAAGTTCCTGGATGAGGAAGAGACCAAAGAGGCGGAGAAGAACATCGTGACAGAGGACACCGAGGATATGATCAACAGTTGCTCAGCGAAGTACTTCTACGTGTCGTTTAACACCAATAAGAAGGGCCGCTTCGTATATCGCTTCTTCGTAATTGTGGGTGAGAACGAAAATTACATCGACATTATCGTGAATGTGGTGATCCCGTACTTCCAGATCATCGACATC…	1583	776.5	-0.0492985
PF3D7_1444100	PF3D7_1444100_e9s3	TTTGCAGAATTATCTATTACTCCTAATAATTACATGGATGATATATTATCTACTTATTCATTTGAACCATTTAAAGAAAAACATATGCTTACAATAATAACAAATAAAGTTACAAATACATTTACATATAATACACAACAGGTAGACAATAAATCATTTTCATCTTCTTATCGAAATGATCATGAAAAAAAAAATAGTTTAATGGATAATTTAATTAAAACTAATATAGTAGAAGATAATTGTGTTAAGGAAAATAGAGAATCCATTGATGAATTTTATTTAACCAAATATGATTTGAACATATCTGATTTAAATAATATGAATAAAAGTGATATAGGAAATATTTATAATGACACACTACATAAGGAACAATCAACAAAGAAAAATACCGAAATGGAT…	2337	769	-0.0502891
PF3D7_1326500	PF3D7_1326500_e1o1-s2	AATGTTTATGATAGTTCCAATTTACATTCAAAAAGTACTGATAATGTAATAATATATTACAAAGATTCAAATAATAAAAAGATGGTAGATGTTATAAATGTATCTAATGAATGTACCTTAGAATCCAAAAATAAAACATCAGACATATATTCAAATATATATAATTATGATAACAAGAGTAAGACACAAAACGGAGATAATAATGTATATATAAATAGGCAAATGTCTTCAGCATTATTTAATACGAATACAGATGATAGTAAAAAAGGGGACTATCTAAATAATACAAATAAAATAATTAGTAGTGGTCTCAATAATGATGGTAATAATATTCGAAATAATACTTATAATTTAAAATATAATATAAATTATAATAATATTAATAATGATATAAACGAA…	1500	777.5	-0.0507105
PF3D7_0813300	PF3D7_0813300_e2s1	TGCAAAGTAGTTAAGCCTGATGAAACTGTAGTCCCTGAGGTTAAAGATGGATATTCAGTTATTCATTTATCAAGGGCCTGTTTAAATAATCCTGAACATGAAGGAAAGATATATGTCCAAGTAGAAGACGGAAATGGATGCTACAACATATGTTGCTTACAAAAAAATGTATGTGAAGATACTCCATTAGATATATTTTTGATGTTAGATAATGATGTAAAAATAAAAACTAGTGGAAGTTCAAATGAAGTCCATATCGTAGGTTACTATGAAGTGTCCTTTGGTCAAGATAATTTAGACGAAGATGAAGATGAATTTGAAGATGAGTTCGATAACGACGAAGTAAGAATGCTTACAAAGAAAAATACCTTAAAAAATTCTCTTTCCAATGGTATATCC…	936	781	-0.0511278
PF3D7_0210200	PF3D7_0210200-S4	ATGTCGTACTCCAAAAAAAAGAAACAGCACACGAACGAGCACATGAACCATCATCAGAACTACCCTATGCGCAAGACAAAGCAGCCCCTCCTCTATATCATTTACAAACTGAAGAAGCTGAACTATAATAATAACAACAACAATAACAATAACAACAATAATAATGACGATAACACGAAGGACCAGCCCAAGCTGACCGTAAACGAGATCAACTGTAACGTGGACACGGTGCTGGAAGAGATAAACGTAAACCTCAAATCGCTTTACGAGCTGAAAAAGTTGAGCAAGAACAAAATCTTTAACAACAAGGCGTTGGCGTTCGACATCCCTCTGTCCATCTCGCCAGACCTGCTCGAGCACCACTACTTTAAGAAATTACTGAAGCACATCGGGTTCCTT…	1566	760	-0.0524881
PF3D7_1429600	PF3D7_1429600	ATGAAAGATATTGCTCTTTTTTTTTTACCTTTAGGGATAATATTATCCTTCTTATTATTAAGTGGTATTGCCATGTTTCAACGCTTGGCTATATTTCTTCAAAAGAAGAGTATAAATTTTCAATTATCGTCTCATAAAATAAATATTTCGATATCATCCATTATATCTTTCTATGCCTTATTAAGATTATTATGTACCATAATTGAATTAAATAATATTATTTATGAGAAAGAAATTTATGAAAATATAACTTCTCTTAACTACAATAGGTCTTATTTAAAAAAAATAAGACTTCAAAGAAATTTCTGGATATTACTCTTATGCTCTATAACATGGATATTTTACATAAGATTTACTTATCTACTTATATATTATCGTGAGAAGGTAAAAGAAAGCGAT…	657	765.5	-0.0526004
PF3D7_1310500	PF3D7_1310500	ATGAATAATAAAAAAACGAATTTTTTTGTAAAAATTCTATGGAGTATATTTTTTCTTTATATATATATGATAAGAATAACGAGATGTGATGAAGATGTTATTGAGTTAAAAAATAATTATATTGAAGGTATAGTAAAGGGGGATGCTGACTTGTTATTTAATTGTACAATATATTTAGATTCAGATACTTATGTAAGTCCAAAGAGTGATGGTAAATTTCTTTTTAAGAATGTAAAAGAAGGAGAATATACCATGTATGTAAATCATCCATATTTAGAATTTAATAAATATTATGTTGAAGTGAAGAAACAAATTACACGAAATAACGGTACCTTATATTTAGTACAAGCATATGAACTTAATTTACCATTTGAGAAAAGCAATTTAATTGTTAATAAT…	615	764.5	-0.0526089
PF3D7_1015200	PF3D7_1015200-e3o3	GGAAATAAAATAAAGTGGTATGCTTGTGGTCCAACCGTTTACGATGCTGCTCATTTGGGACATGCAAGAACATATGTTAGCTTTGATATTATAAGAAGAATATTAGTTAATTATTTCAAGTATGATGTATTTATGGTAATAAACATAACCGATATTGATGATAAGATAATTAAAAGAAGTGTAGAAGAAAAAATTGGCTTTACTGAATTAGCTAGAAAATGGGAATATGAATTTTGGGAAGACATGAAAAGTTTGAACGTTCTTTTACCAACAGCTATTACTAGAGTAAGTGAATATGTAGGTGATATTGTAAAATATATAGAAAAAATTATTGAAAATAAATATGCTTATGTAAGTGAAGAAGGGAGTGTATATTTTGACATTGATGAATTTAAAAAA…	1659	765	-0.053201
PF3D7_0935500	PF3D7_0935500-e1o3	ATGATCTTTTGTAAAGATAATAAGAAAAAAGGGTCAAACAAAAAATTTAATGTGAACAGAGTTGTAGAAGATGATATATGTTTGACTAAGAATGAAAAAATTAGGAAAGGAAAATTATGTTTTGAAATGAACTTATTAAGGTTCCTTTTAAATAAAACCTCTTTTGTAATACTTCTTTTTTTGTATATTTTTTTTGTACAA	201	764	-0.0533092
PF3D7_0518700	PF3D7_0518700_e4s1	ATAAAAACTCCTTCTCAAATTAAAAAAACAACCAAGGCTCTAAAAAATTCAATAATAACTTTGATAAAAGATATTAATGGAAACCATGTGGTTCAGAAATGTTTAATTACCTTAACGAGTCATCAGTGTGATTTTATATACGAAGCTATTTTAAATAACTGTGTTGAAGTATCCACGCATAGACACGGCTGTTGTGTGATTCAGAGATGCATAGACTCTGCGAACGAGGCACAAAAG	237	765	-0.0542357
PF3D7_1320600	PF3D7_1320600_C	ATGCTCGAGATGGCGATGAAGGAAGACTACTACGACTATTTATTCAAGATCGTCCTGATCGGCGACTCGGGCGTCGGCAAGAGCAATTTGCTCTCGCGCTTCACCCGTGATGAGTTTAACTTGGAGAGTAAATCTACAATTGGCGTGGAGTTCGCGACAAAGTCTATCCAGCTGAAGAACAACAAGATCATCAAGGCACAGATTTGGGACACGGCCGGCCAGGAGCGCTACCGCGCTATCACTTCCGCCTACTACCGTGGTGCTGTGGGCGCACTGCTGGTTTACGACATTACCAAGAAGAACAGTTTCGAGAACATCGAGAAGTGGCTGAAGGAGCTGCGTGACAACGCGGACAGTAACATCGTGATCCTGCTGGTGGGAAACAAGTCAGACCTTAAA…	731	773	-0.0543972
PF3D7_0113900	PF3D7_0113900-e2o2	CTTTTTCAAAAAAAAGATAACCAAAATTGCAATTCACATAAATTTTGCCTGAATTGTTCAGGTAGTTACCTAAAAAATTCCAGATGGCTATCTGAAACTTCGGTATCTTATAGTGATGAAGGTGAGCCCTTAAAATATGGAGCAAATGATAATAACTATGATTCAAATTTGTTGAAAAGTGAAGAACAAAAACAAGAAATAAGTGAACATATGAAAATGCTTATAAAATTATATATAGATAGTTCTCATGATTCTGCAAAGGAAGAGAAATTATTTCAACAAGTAAAGAAATATTTTAAAAATAATGAATATAAAGATTTTATGCGTACATTTATTAAAGTTATAAAAATTCACAATGATTTAACACATTTAAAAAAACAAATGGCATCCACTGAAAAG…	657	772.5	-0.0546484
PF3D7_1407000	PF3D7_1407000_e1s1	ATGATAAAATTTAAAGATATCCTTATCTTCATTAATATTTATATATTAATTTTAAATGCATATTGTAAAGAATGGTGTAAAGCCACGTTTGAATATGGTAAGTCTGATTATGCTGAATGTATAAGTGAAGGAGATAGTATTAGTAGATATATGATTGAAACTATTCCAATATTATCTAAAGATGTAGATTTATATAGTAATGTTTCTTTAGTTCTTTCGAATGGTTATGGTTCTAAAACAAAGGAAATAATTATAGGGAATGAAAATGATGGTTTATTAAATAAGATTTTTACAGTTCGTTCAGATATAGGAAATCCTGAATATATACATATAAAATTAAATTCACAAAATAAAAATTGGAAATGTAAAAAAATTACGGTTTGGAAAGATTATAAATAT…	1938	772	-0.0549359
PF3D7_1137600	PF3D7_1137600-e1o2	ATGAGAAAAGGAAAAGATAAGAACGATCCTATGTCTACAAGAATCGAAAAGAAAATCATTTTGGATATGTTAAAAGAAAATGATTGCCAAACCATAGAAGAGTTGAAAAATTTAGTTCTTTTCTTAAATAATGAAAATAAAAGATTACATACTATGAATATGGATTCTTTAAAAAAAATAAATATACTTAGTGTAAGGGTTAAGAGTCTCGAAAAAATATCAAAGAAATATGATCAATTTTATGCAAGCAAAAAGAAATATAAAAATAAATTAAAGGAATTGGAAAGGAAAAGTGTCACTCTTAAAAATTATACA	315	764	-0.0550055
PF3D7_1417800	PF3D7_1417800_e2s1	GATAAGAAAAAATTAGAAGAAGATTTAGAATCTAACAAGTATGATATTGATGAAGAAGATTTACTAGAAGATGAAGGAAGGTTAAATGAAGAAGAAAGACAAGCCGAGCTAGAAGGAGAAAGTTTATTTGAAGAAGATGAAGGATTTATTTTTGGAGCTGATGATGAAAAAAAAGAAATGCAAAAGTTACGAAATTTAGGATTAGATAATGATGATTATGATGATGATTTTATTGATGATGAATTAGATTATGAGGATAATTTAAAAGCAAGAAGAGCAGCAGAAAGACATATGCAGATGCAAAGAAAACAAGAGGGTAAATATGAAAAAAATAAATTTTGGAAAACATTAGAAGATCAATTAGAAGGTGATGATGAAGAAGAAGATATTTTTGATAAG…	2907	772	-0.0555489
PF3D7_0518700	PF3D7_0518700_e5s1	GAACTGTTCATCAGAAATATTTCGAACAATGCCCTGGATTTAGTACAAGATGCATTCGGAAATTACGTTGTACAATATATTCTGAATTTAGGAAATGAGAAAGTAAATTTAGAAATAGCCAATAAGTTATTACCAAATATCGAGGAACTAGCTGTTCAGAAATTTTCATCTAATGTTGTAGAGAAATGTCTAATAATAGGTAATAACAAATGTAGGAAACTCATAATAAATGAAATATTGAAAAAAGATAAAGATATATTAAAACAAATAATTTTAGATCCATTTGGAAATTATGTTATTCAAAGAGCATTGTCAGTTGCTTCAGAACCTGAATTAACAAAATTAGTTGAAGGAATCAAACCATATATAAAAGAATTACGTAATATATCATCTGGAAAA…	2688	764.5	-0.0564701
PF3D7_0320800	PF3D7_0320800_e1s1	ATGAGTTATAAAACCAATTGTACGAACTCTAATGCTAATACAAATACTTTGAATAGTTCTTCAAATTATAACAAAATAGATGATAATATAATATTAGATGAAGAATGGAAAAAGAAAATTCTGGAACCATTAAAAGATCTAAGATATAAGACAGAAGATGTAACGAAAACGAAAGGCAATGAATTTGAAGATTATTTTTTGAAGAGAGAATTATTAATGGGTATCTTTGAAAAAGGATATGAGAAACCATCACCTATACAAGAGGAAAGTATACCTGTAGCTTTGGCTGGAAAAAATATTTTAGCAAGGGCAAAAAATGGTACAGGCAAAACAGCAGCTTTTGCTATACCCTTACTAGAGAAATGTAATACCCACAAAAATTTTATTCAAGGA	393	772.5	-0.0565392
PF3D7_1477300	PF3D7_1477300-e1o2	ATGTCGAGGATAGACACGCGCAACAATTCTTACAGGCGCCAGAACTCAAAAGCTGTTAATGAGTATTTATATGAAATAATTCGTGCGAGGAATAAACAGGCACAGAGGAAAAAATATTTAAAAATATTTTTATGCATTTCCTTATGCATTCTTTTTTTTTTAATAGGTTATGCATTCATTATG	183	773	-0.0567
PF3D7_1103800	PF3D7_1103800_e1s2	AGTAAAAGGATGCCTCCACAAAATAAAAAAAGCGATTTTGTTATGTCAAAAAATAATATGAACAATAAAAATATCATGACAAATAATAACAACAACAACAACAACAACAATAATAATAATAATAATAATAATAATAGTAACAATAATAATATCAATTTGAATGATTTAAATATTATTTCTAGTACTAATAATTTTAACCTACCTGTGGATTTAAAAAATATATATATGAAAGAAAATAGATCAAATGTTAATAATATATATAACATAAATAATTCTATTAATGATAGTACGAAATTAGAGGAACTACAAAATATATCACAAAATATATTATCAAATAATAGAATAAATACTGAAATAGATACTTATTTTAATACAAATAATCAACCATCCTTAAATACT…	2571	763	-0.0575598
PF3D7_0323800	PF3D7_0323800_e1s1	ATGGAAAAAGAAGAAGATTTAAAAGATTTTTGTGTAATAGATAATCGTGGTAGTGATAGTCCGATAGATGTATCGTGTGATAAGATAATTGATAAGAATGGTAATGTGATATATAAAAGTTATAATAATGTGTACAAACTAACGTATAAGCACATATTTAAATATAAAAGAATAAGCAGCATTAGTACAGAT	192	763.5	-0.0579619
PF3D7_0301700	PF3D7_0301700_e1s1	ATGGCAAAAGATAGTCAAAAGAACTTGAATGTTTCTAATAATAATAACGTCCAATGCACCATGGGAAGATCAAGCCAGAACATAAATAAATCCGATTCAAAAGGAAAAATAAAAAGGTGCACTTATGCCTATAAAATTTTATTATGTACAATTTTTATCTGGATATGTCAATGTTTTTATAAT	183	763	-0.0584651
PF3D7_1228600	PF3D7_1228600_e1s1	ATGATGAACATGAAAATTGTTTTATTCAGTTTATTGCTCTTTGTCATAAGATGGAATATTATTAGTTGTAATAAAAACGACAAGAACCAAGGTGTTGATATGAATGTTTTGAATAATTATGAAAATTTATTTAAATTTGTTAAATGTGAATATTGTAATGAACATACTTATGTTAAAGGTAAGAAAGCTCCTTCAGATCCTCAATGTGCTGATATAAAAGAAGAATGCAAAGAATTACTTAAGGAAAAACAATACACAGATTCAGTTACATATTTAATGGATGGTTTTAAATCAGCAAATAATTCAGCAAATAATGGTAAAAAAAATAACGCTGAAGAAATGAAAAATTTAGTAAATTTCTTACAATCTCATAAGAAATTAATTAAAGCATTAAAAAAG…	2229	755	-0.0585607
PF3D7_0208900	PF3D7_0208900_e1s3	AAAGAAAAAGAAACTTCGGATAAAATCAAACGTGTAACGCTCTCAACAAACGATAATATAAATACTATATTAGTATATAGATGTAATATAGATCTAGGTTCTTTTGATAAATTCAAAATCAAATGTCCAAGCAAACTTAATGAAGAAGAAGTAGAAAATAATAAATTATATCCTAATCTAATATATAGTTCTAATTTAGGACTAGATGAAACAGATATGTTAAATGGATTAACCAAATTATTATATGGTTCTGTTTTAATAAATAAAACAGAAAAAAACGTTTCCTTCTTTGAAAAAGGAGAATTAGAATTAATAATTTCTCCATATACTGATTCATCAAAAAATATTATTTTCTCATGTGAAAATGTTCCTAGAAATCTATCAAAAGGAATTATAGGT…	2538	761.5	-0.0589785
PF3D7_0212400	PF3D7_0212400_e2o3-s1	AATGTTGTGAGCAAATCCCTAAATAACGACATTTTGTACAAAAAAAAAAAAGGAGAACATGTTACCAGAGAGAATTTAAGCTTATCCCTACTTTCGTTTTTTTTAGAGGATTATAAGAGTAGCTGTTTTTTATATGAGAGTTTAAATACATTTTTTAAAATAAACAATTTTAATAATATATATTTTTTGTGTAAATATAGTAGTGGATATTTACCTTTGGAAAGGATCATAAAACTTTTTATGGACGTTATATTTGGTCACTTTATTAAATTTATAAATATAAATGAAAACATAAATGATTATGAACTTTTGGAAGTATTAGAATATAATGGTAATAAATGTTATGAGCTTTTAAGGTTTCTATTTTTTTTTATTAAGCAAAATGATTTAATAACTATA…	1500	763	-0.0598227
PF3D7_0614900	PF3D7_0614900-e2o3	GTTCTTATACTTTGTGTTTATTACAACTATATAATTTTAAAGTATTATTTTTATTCTTTGTTTTGGGCTTTTATTATTTCCATTCCCTTACATCATGTAAAAGTTAAATTAAAAGAATTTTTCAAAAAGAAAATTATAAAAAAGAAAAAAAATGCAAAAAGCGTGAATGGAAAAACGTACCAGTATATTCCAAATGAAAAACATGAGACATGTAATAAATATAAAAATGAAAAATTAATAAAAAATAAAGGGCCTGGTATTATTGAAGATGAGCATTTATTACATTGCTTAAATTACAAAGATGGACATACTAATATTATAAAAAAAAAAAAAGATTCATATAAAAAAACAAAAACAAATAATTGTACCAAAGAAAATAAGAATGAAGATAAATATCAA…	1011	761.5	-0.0599667
PF3D7_0417000	PF3D7_0417000-e1o2	ATGAATATTGTTCTTCAAATTTTTCTTGTCCTTTCTTTTTATCAAATAATCTGTTTTTTTCTTGCTCACTATAATCCATACTTTACTACGAATATAGTCAAATGTGATATTCATATAATTGATAATACAAAAGGAAAAAAAAACGATAATGATAAGAAATATGAACAATTAAATAACGTTTTCTCTTTGAATAAACAAAAGATACTATCAAACTTAAATTACATAAAAGAGAAAAAAACATTAAGTTATTTACTCTTATCATATAATAATAAGAAAAAGAAAGCAATATTAAAAAGAAAAATAAAACGACAAGAATGTTATGAAAAAAAATATGAGGAAACAAATAAAGAAAATGAACATAGATATATTAATATATATAAAATGGAAAATAAATATAAG…	531	769	-0.0602071
PF3D7_0919400	PF3D7_0919400_e2s1	ATAAAGTTTGTTTTTCCAAGAAAAGATGAAGTTTTAGAACACTTTAATATAGAAAACAATATGAGTCTTATCAGTATTATGGATTATAATAATGCCTCTTTTGTTACTCTTTCTCAAATGCTAAGACCTAAAAAATATGCTAAAATAATGGATGAAAATATAACTGTATCACATGTTGAAAGTTTCTTAGATGAATTTTTAAAAAACAATCTTGCTGTTTATCGAAAATCGGAAAAACCAATTAAAAGAAGAGAAAAACAAAAATATCAAATTTTATGTTCAAATGATTTCGAGTCATATGTTATGGATCCTGAAAAACTTGTTCTTATATTTTATCATGTTCAAGGTTGTAAAGAATGTAAACCATTATTTACATTTTGGGATACTGTAGCGAATTAT…	516	717.5	-0.0603506
PF3D7_1431100	PF3D7_1431100_e1s1	ATGGATAAAGATAAGGATAAAAGCAAAAACACACCTCTGTTATACCAAGACACAATGAACGATTTAGGTGATGGTTTACAAAACATGGACACTCTTCGTTTAAATAGAAATGGGAATACCGGAAATGGGAACAAGAATAAGACGAACGGGAGCAAAGGCGTTAAAGGTGAATATGAGAAGAAGAAAGAAACAAATGGTCATGATGATTATGTGAAAGAGTCCTTAAATAGAATGTTAGAATCTCATATAGATCAATATTTTAAGGGTTTGGATTATTATAAGAATAATCCTAAATGTAAAATCGATCCAAAGATTCATTTACATGGTTCTGAAGAGATAGAAAATTACATAGTGAAAGAGAAGATATTTGTAACTACCTATTTTCAATATATTGATGTT…	1041	772	-0.0609552
PF3D7_1135600	PF3D7_1135600_e1s2	ATATCAAACGTAGTATTAAATGATAATATAGAAGAAAAAGAAAATAATATTTTGATTGATCATATATTAAGTAATGAAGATTTAATATATGAAAAAGAAATATGTACTAATGGAATATTAAAAAATATTTTATTAAAATTATTTACTATTCTTTATAATTTGTTAGATACTACAGAAGAAGAATTAGATGAATCTTTTTTGGTTAAGATGGAAAATACAATTTACCATTTTAATTGTCCTATATGTTTTATATATATAATATTGAATATTATAAGAAAGAAAAAAAAAAATATAAATGAATTTATAGAAAAGTTAAAAAATAAAATAGTATATTTTTTTGAACATATCGAATCTATTGAATTGAATAATATATTTTGTAATATATTAATAACGTTTATA…	2028	760.5	-0.0612071
PF3D7_1250100	PF3D7_1250100_e1s1	ATGAAGTTGCTGTTGTTCTTTTTCATATCGTCTATCTTCCTTCAGCTGACCTCTGGGAAAAGGATATTAAATTTTGATAACATCATTAAACATCTTAAGGAAAGCAAATTATTGCCTGAAGATATCCCTCACGTTTTAGAAAATGACATAATTATAGTTCCTCCTTATTTAATTTATAAATATAAAGGAAAAATATATCACCTACATAATAATGTAGACCTTACTTTGATAAACCATCCTGAAGAAGATTCATGCGATAAGGAAGAAATTTGGGAATCCCCATTTCCTCCTAAAGTACCGGAACCGGAACGACCACACGAACCAGAAATGGAACCTCAGGTTGAACCCGAACCAGGACCATTGCCTGAAGAGGTCAGAGAACCTGAACCGGAACCAGAA…	2382	769.5	-0.0619408
PF3D7_0515600	PF3D7_0515600_10s1	AATTTATCTTATAATAACAAAATGAACTATAATAGGATATCACAAGATATACCAACTAAAATAACAAATAAAAATATGGCCTATGAAAGTATCATGGGGTTACTATTTCCAAATATACGTTCTCACAAAAGTTGTAATGTGAATGCATACTATAAAGATCATAATGATTACAGAAAGAATAAAACAATCATTCCAGAATTTTCAAATGCCTATTCATTTAAAAATGATATAAGAATAAATAATTTATTTAAAAATCTG	258	709.5	-0.0626625
PF3D7_0604000	PF3D7_0604000_e1o1-s2	AAAATGATTAAGAAATGGTTTAATCTTCTTAGTTATTTTAATAACAAATCTGAATTTATAATAATAATAAAGGAATATTTAAATAAAATATTTCGACAAAATATTGATGAATTAATAGATATAAACTATTTTTCTAAAACTGTACATTATTTAACAAATCAAATTAATAGTAAAAGTATTCATGCTATAATATATACATATGAGAAGAAATTAGATTTAATGAAATCATATGATTTTAGTTATAGTTTAATAATATTATTAAGATTTTTAATATTAAATCATAATTTATTTAATAAAATCATTGATTATGCTATTGATGATCCTTTTAAAAAATTTGAGGAAGCAAAATATTTTATTCGATTTATTAAAAGTATAGATAGATATCCATTAATATATCCT…	1500	769	-0.0629398
PF3D7_0504900	PF3D7_0504900_C	ATGCTCGAGATGCCGAACGACCTGCTGAACAACATGACAATCAACAAGAAGGATAATAAATATCCGTATTGTGTGGTGTTCACCTACCTGCCGTGCGCATCCACGTTCATTCCGACCGTCGGGCACGTGGGCATCTGCACCAGCACGGGCATCATCCATGACTTCTCGGGTTCATATTCAGTGTCGGTCGACAACATGGAGTTCGGAGATCCGATGAAGTACTGGCAGTTAGACAAGAACAAATTGCCGCTCTCTATTAGCGACAAATCCTACGATGACGCGATCTACAAAACCGACGAGATCTTCAAGAAACGTCGTCACAATCTTTTCCTGAATAACTGCCATCACCATGTGGCGATGGCGTTGAATAACATCAAATACAAAGGGCGCAGCGACTGG…	599	768.5	-0.0630776
PF3D7_0320700	PF3D7_0320700_C	ATGCTCGAGATGTCTGGTAACAACGTGCAGGAAGAGGACAGTACATTCCACGTCTCAAATCTGTATTCAGAGACCGAGATTAAGAAGATCACGCAGGATTTCATTAGCGAGAAGATTCGCGAGCAGAACTTCGAAGAGATCGTCAAGTATAGCAACATCCGCATCTTCCTTTCCCTGGTCCTCATCGTCATTGGGACCTATTGTTCCATCTTCGTACAATACAAGAAGAATCCGGTTATCATGATTCAGCTGCTGGTAGCGTTCTTCGTTGTGAGCACCACCCTGATCATTTTCGAGTACTTCTTCTTCGACGACGTCTTCATGATTCTCCGCAGTAACAATGGGTCACTCGTCAAGTTATACTGCCGCCTGGACGTCAAGAAGTCTACGCTGATCCTG…	620	767.5	-0.06396
PF3D7_0318000	PF3D7_0318000	ATGCAGTACCTGCTGCTCTACATCCTTCTCTCAATCTGCAGCTACAACATCCTCTCCATCAAGTGCTTTGAGAACGTGTACAAGCGCGACAACATTAACAACCTGAACTTCAAGAACAACAACTACGAGGACGACGAGAAGAAGTACTACTTCAATCCGCAGGTAGTGTATCACGTTAAGGGAGACAAGACCAAGGCCGAGAACGTAGACATGTACGACAACATTAAGAACAAGATGGACATCCTGCAAAACCTCAACAAGCAGTACAACTTCGACAAGATCAAGAAGGAATACTACATGGACGGGAGCAATAAGAAGTACTTGAATAACCTGCTGAAGAAGATCCTGTCCAACGCGCTGAACATCCCTCAGAAGCAGATCAACATCCATGACATCAAC…	606	767.5	-0.0644162
PF3D7_0708700	PF3D7_0708700	ATGTTATTACATCAAAATTTACGCAAGGAGGGTAATAACATCTTTTTTTATTTAAATAAAGAAAATGGTAAAAATATTTTTAGAAGATACGTTGCATCTCAACCTTTAGGAATAAATATACCTGACCCACCTCCAAGAGAATATTTACCAAATGGTGAACCCAAAACATATAGATTAAATCAAAGATATTATAATCATAAGTACGATTGGGAAAGATGGACATTAAGACCAGCAGGAGTTTTTCATACTTATGTCTATGGAGAATTTGCAAAAGATCATAAACCTTTATTAGCATGGTTACTTCAGTATCCAATTCCTTTAGCGTTCATTCCTTATTTTTTATTTGCCTTTGGATTATCTTTTGCATTTCACCACATTTCATACCTTGGTATAAAACCC…	684	758	-0.0650739
PF3D7_0212400	PF3D7_0212400_e1o3-s3	TATTTATTTTTTTTTTCCTTAAAAGTTCAAGAATTCTCAAGGTTTCAAATTATGATAGTACGATGTTTATCTTTTTTATTAAAAAAAAAAAATATTAATAAATTGAATGCTTACATTTTTCAGTTATTTTCCTATTTAGAAAATGATCAAATAAATATAAATGAAAAAGGGATGGTACATAGGAAGAGTTCAAAATATCATAGAAATAATCAAGAAGAGTATTCACATAATAACAAAACGAATGATAATAGTGTTAGTAATTTATATCGTGATATAGAAAATGAATATGATGAAAATCATTTAGAAAGAAGAAAAGACAGAAATGTATTTTCTTCTAATATGAATGATGATAAAAAATATAACAATCTATCTGATTTTAAATACACAAAAGAAAATATG…	1500	762.5	-0.0652473
PF3D7_0936600	PF3D7_0936600-e2o2	TTTTATATATATAATGGTAATTGTAATGTAGTAGAAGGTACCATTGGTCATAAAAGAAAGCTGTCTGAATTAGTAGACTCCAAAAGTGGTTGTTTGAGAAGTGGTGAAAATGAAACGAATGTAAAAAGTTCATCATCTCAAACGGATTCTGTATTAAGCAGTAATAATTTGACAGATTTCTATAATTCATATAATGAATTTAATATTAAAGATGAATTAGACGATATATTTAAAAGTATAGGATTAACTTCTTTACATGATAAATATTATGATTTAACAAAACAGTGGAGTGATGAAAAAATTGAAGAGATTATAAACTCTTTATTGGATATTCCAAATAAATTTGATGTACTTACTATATGGATGCAAGTCCGAGGTAGTGAGAAATTGAAGATGCAT…	699	757	-0.0668832
PF3D7_0721700	PF3D7_0721700	ATGAATAAGTTATTGCTTTTTTGTCTTTTCCTATACAGCGTCGTAGCTGTAAGACCCTACAAGGAACGTTATGGTAATGTTTCCAAGCATTTAGATAACGAGTTTAAGAAGAGGAACCCTGATGGAGGTAAACCATTCAATTTAAAAGAAAATATTAATTATGTAAGAAAAAATAATTATGAGTTGTACGTTGATGCCAATGGAGAATTAAAACAACAGAATTATAATGTGAATGAACCAAGACAAGTTTTAAAAAAAAATATGGATAAATTTCGTTATTTAATAAACGATTTAGAAGTATTATTTGGTGTGTATGAATTAAATGCTAGAGATAAAGAAAAGGTATTAAGAGAGACTTTAAAAAAAGAATCTTTATGCTTTACTATTGCTGGATTAGTA…	1401	766	-0.0669661
PF3D7_0817500	PF3D7_0817500_C	ATGCTCGAGATGGGATTCAAGATTGTGTTCATCTATCTGATCTTCGTGTGTCTGATGAAGATTATCCCCGGCTTCTTCACCAACAAGCTCACTAACAGCTTCTACAGCACGTTCGTCAAGCTCAGCTATAAGAACAAGTTCATGACGGGTATTCTGACGCGCCGTTTAGCCAAAATGGCCGATGAGGAAGAGCGCGCGCTCGAAGCGGCCGGCAAAGACGAGAACGGCGATTCCATCTTTGGTAAGATCGCCCGCGGGGAAGTCCCGGTGGATGCCGTTTACGAGGACGACAAGGTTATTGCCTTCAACGACATCTATCCGCAGGCGCCGGTTCACATCATTGTTATTCCCAAGCGTCGCGACGGCCTGACGCGCCTGAGTAAAGCGGAAGAGAAGCAC…	638	766	-0.0684847
PF3D7_0523100	PF3D7_0523100_e1s1	ATGAAGAAAAATATACAATGCTTGAATATTTTTTATAAAACCAAATGGAGAAATATACACAACAGTAGTATTGTGAGGTCAAAAGAAAATTTGAACCTTCAAAAAATATATACAGGAGAAAAACAAAATTTTAACAAAGTATCCTTTAAAAAAGAGAAAATAGAAGATGTCATTAAAGAAGTGAAGTTTGATTACTATTATTTTAATGAAGGAAAAAAAAATAAATACAAAGATATCCCATTAAATATATCCATAATTAATGAATCGGACTTTCCGCCATTTAAGGCAGTTGATGAAAAACTGCATTTCTCAGTATTAGAAAATGATTTGAAAATTATATCAACCAATAGAAACAATAGTGTGTGTTCGATAGGTAAACGT	381	765.5	-0.0685434
PF3D7_0522400	PF3D7_0522400_e4s2	CATGCTAATTCTTCTAAATATACAGAAATGTTACTCAATACAAGTGAAAATAGTCATAACAAAATAGATAAAGTTAAAAGCCATAAAGCACGTAAAAATGTATTTAAATATCTCCTAAGAAATGAAAGGTTGTTATTTAAAAGAAGAAGAATGAATAATAATAAAAACAAAGTAAAAAAATATAAAAAGGCAAATAAAAAAAATAATAACATGGATGATGATTATAATAATGATAATAATAATAATAATAATAATAATAATAATAATATTATTATTAGAAGGAGTAGAAGAAAAGGACTGAGAGCTTTTGATAATATAAAAATAATGAAGAGATTTAGATTATTTAATAAAACTATACAATCGAGCAAATTAAAGGAACATGAGGATGAACTGGAACGC…	2667	765.5	-0.0687359
PF3D7_0526900	PF3D7_0526900-e1o4	ATGATGAAAATAATTAAAGAAGTAAGAGCAGTTGTACTTTTGTTATTTGTTTTACTTTTGAATTCGTCTAATGTAAAAGCTGCTTATTTTTTTGTGAAAGAAGGTGTTGATAAATGTTTTGTTGAGAGTGTAGCAAATAATGTCGTTATAACAGCAACATATGATAATTATGGTTTGAAG	180	766.5	-0.0687408
PF3D7_0920300	PF3D7_0920300	ATGAATATCTTCTGCTTTTGCCTGGTGATCAGCTTTCTGCTCTTTACGAAGAACAACGAAATCGGCAGTAAGCTGATCCACCAGCCCATCAACGTGTACTACAAGGACTACTCAGAGGGCCTCACAATTAACCAGAAGGACAAGCTGATGGAGATCCTGCTGCACAACTACGACTACGAGTCGCAAGACACGACCTCAAGTCACGACGACCACATCAACATCATCGACGACAAGGAGAAGAATATTCAGGCGATCATGAAGGATCAGGAGATTCTCAACAATAAGATCAAAGAGGAGCTCAATAAGTACATCAAGCGTAACAAGAAAATGAACGTGAAGTACGACCACAAGTCACGCGACGAGAACATTAACAGCAACAACAACGATGAGGACATGAAC…	561	764.5	-0.0698365
PF3D7_1014300	PF3D7_1014300_e2s1	AATATATGTTTAAACGTTCCCGTCTACTCCCCTCTGGAAATAATGGTCAAACATTTAATTTTATGCAGGAATTTATTACGTGAGAAAAAAGGCAATATAGGTATTATTTATGATTGTAGTTATGTATGCCAACCTTATAAAAGATACATGATAAAAATAAAAAATAACAAAAAAAAAAGAAGATACTTTAAAGAAACAAGTACCAAATTAAAAAACGAAAAAAATTCACTAAATGGAAAACTCAATGATGATAAAAGATTATCTATATTTCAA	273	765	-0.0703764
PF3D7_1122100	PF3D7_1122100-e2o3	TTTGAAATAATCAAAATACAAATCCGATCCTTTGAATTTGACTTTGATATAGATAGGGGAATATTGTTGGAAAGTGGCATATTTAAACAAAAAAAAAATTATATTTCAAATGAAAAAAATGACGATTATATTTATAAATATACTTCCTCATTACTCATTGATATTGTTTTACCAGACACAAGT	183	755.5	-0.0705958
PF3D7_1346400	PF3D7_1346400_e1s1	ATGTTCGAATCACTAGTTGAAAAACTGTTGAATAAATTTTTGGCTCCATACGTAGAAGGTATAGAACGGAATTTACATTTGGGTGTATGGTCTGGTAATATTGTATTAGAGAATTTAAAATTGAAACCACAAATAACTGAAATATTAGACTTGTCATTTAAGATAATTCATGGGAATATAGGAAGAATAAATATACAGATACCATGGAGCAGTTTAGGAAAAAACCCTGTGTGCGTTTTAATAAAAAATGTTCACATATATATAAAACCACGATGTTATAAAAAAAGTGAAGAAGTTATTATTGAAGAATTAAGAAAAGCAAAAATGCATAGATTACAGTTATTAGAAGAAGAAATTTCTCTTATTAAGTTACAAAAAAATAATGAGAAATCTTCTGAA…	3039	756.5	-0.0710515
PF3D7_0726400	PF3D7_0726400_e4s2	CCCATCAATATTAACGATATATCTTTTATTAAAAATTATTTAAGGATAGAATTAAAAAAAGATAATATTAAAAATAAAAATATCATCCTTATATATAGCTTATTCATTTTAATAAAAATGTATCTTGTATGTAAAGAAAATAATAGGAATATAAAATTTGAAGAATTTATACAAATGAATATATATAACAAAATGTGTGTTATATTAGATTTCGATATAAAATATTTATCATACGAAGATGATCAAAAAAATAATATTAAATATTTTTATGATAAATTAATAGATTTGTTAGAAGAATATAAATATATAGATGAACATATAAAATATACAAGTTGTTATGTAACATTTGATAAAGATATAATTTATTTAAATTATAAAAAATCTAATAATTTTTTAGAT…	2484	767	-0.0711512
PF3D7_1413900	PF3D7_1413900-e1o3	ATGGAAGAAATTATTCTCCATATGATTATTATTGCACCATTAACAAAATGGTTGATTGGATCAAATAGGAGATGGAACCAAGGGAAAAGGGAGTATGGTATATATATTGCTTTGCTTGTACTATTTTGTGTAGGTATATATGAGTTAAGAAAACCGAATCAAAATTTGTATGAAGTATTAAATTTGAATGCATATGCTTCAAAAACGGATATACAACAGTCATTTCGAAAAATGTCAAGGATATATCATCCAGATAAAAATAAAGAACCTGATTCTTTAGATCGTTTTAATAAGATAAGAGAAGCATATGAAGTGTTATCTAATGATAAAAAGAAATATACTTATGATAGATTTGGTGATTTTGGAGATAGTGAAATAACAAGTTTCTTTTATGTAGAA…	792	763.5	-0.0714405
PF3D7_0510000	PF3D7_0510000-S2_C	ATGCTCGAGAATGACTCCGCGAAGAAGGAGAGTATGCAGAACGACTACAACGACGAGATGATTGAGACCAAGGAAGACAACAAGAACGAGGTGTTCGTCCTTAAGAACAAGAAGTGCATCCAGCCCGAGCTGAAGTGCATTGACGAGAACAAAGTCGAGATGTGCCTGTGCTTCGACAACCGCGGCAGCACTAACAAGATTAAGAAGAAGGAGATCATCAACATCATCCACTTCAGCTACTTCCTCATCACCCGCATCTTCCTGTACGAGAAGAAAGCGATTGAGAACCAAGTCAACTTCATGATCGAAAACGAGTACGGCGAGGAGAAGCACTGCATCGACAACCTGAATGATAAGATTAATAACCTGAAGTACGACAACATCATCAACAAGTACAAG…	980	758.5	-0.0716254
PF3D7_1322000	PF3D7_1322000-e2o4	ATATTAAACATTGCTGAAAGTTTTAATCCCATTTCTCTTAATACACATATGTATTTGGAAAAGGCACAAGAAGTATGTCCTCTTACCATAGAAGAAATAAGAAAGGTTGTTAGACCTGAATCAAACATAGAAAAGGCTCAGACGTCATGTTTCGGG	156	757.5	-0.0720462
PF3D7_1251000	PF3D7_1251000_e1s1	ATGGAAAAAGAAGAAATTCAATTTAAAGAAAAGTTATATTTCATAAACTTATATAATACGATATATAATATATATATATATATTATCAAGTTATTATTTTATTTTATTTTTTTTTTTTTAAAACATTACAGTATTATATATGTATCAGCTATAAATAAAGACGGAAAACATTATGAACTCATTTTGAATTTATTGAGACCAATAATTCCAGAG	213	757	-0.0720684
PF3D7_0209000	PF3D7_0209000_s3	AATATAAAATTTGATAATTATGTTACTGGCACTGATCAAAATAAATATCTTATGACATATATGGATTTACATTTATCTCATAAACGTAATTATTTAAAGGAATTATTTCATGATTTAGGTAAAAAAAAACCAGCAGATACAGATGCTAACCCTGAATCTATTATCGAATCTTTAAGTATTAATGAATCTAATGAATCTGGACCTTTTCCAACCGGGGATGTAGATGCAGAACATTTAATATTAGAAGGATATGATACATGGGAAAGTTTATATGATGAACAATTAGAAGAAGTTATATATAATGATATTGAATCTTTAGAATTAAAAGATATTGAACAATATGTTTTACAAGTTAATTTAAAAGCTCCAAAATTAATGATGTCTGCTCAAATTCATAAT…	2394	762.5	-0.0728307
PF3D7_1035300	PF3D7_1035300-S1	ATGCGTAATCTGTTCCACATTACCATCTGCCTCGTGACGCTCAACCTGTTTATTCTGGAGATTAATGCAAAAACCAATACCTCCGAAAATCGCAACAAGCGTATTGGAGGACCCAAGTTAAGGGGAAATGTTACATCGAATATAAAGTTCCCCAGCGACAATAAGGGCAAGATTATCCGCGGGTCAAACGACAAATTGAACAAAAACTCCGAAGACGTCCTCGAGCAGTCCGAGAAATCGCTAGTGAGCGAGAACGTCCCAAGCGGCTTAGACATTGATGACATCCCCAAGGAATCTATTTTCATACAGGAGGATCAGGAAGGGCAGACACATTCGGAGCTGAATCCCGAAACGTCCGAGCACTCTAAGGATCTCAACAATAACGATTCTAAGAACGAG…	1278	762.5	-0.0734728
PF3D7_1036400	PF3D7_1036400_e1	ATGAAACATATTTTGTACATATCATTTTACTTTATCCTTGTTAATTTATTGATATTTCATATAAATGGAAAGATAATAAAGAATTCTGAAAAAGATGAAATCATAAAATCTAACTTGAGAAGTGGTTCTTCAAATTCTAGGAATCGAATAAATGAGGAAAAGCACGAGAAGAAACACGTTTTATCTCATAATTCATATGAGAAAACTAAAAATAATGAAAATAATAAATTTTTCGATAAGGATAAAGAGTTAACGATGTCTAATGTAAAAAATGTGTCACAAACAAATTTCAAAAGTCTTTTAAGAAATCTTGGTGTTTCAGAGAATATATTCCTTAAAGAAAATAAATTAAATAAGGAAGGGAAATTAATTGAACACATAATAAATGATGATGACGAT…	1698	761.5	-0.0743531
PF3D7_1025500	PF3D7_1025500_e2s3	TTGGATGTTAGTCTTATTAATAAAAAGGTATATTTTATAAATAATATAAATGAACTTATTACATATATTAAAAAAATAATGGATGAATTATTTTTTATACAGAATGATAAATATAGTAAACATATATATAACGAAATATACAAATTATCAAAGCAGTTATTAAATTTTAAAAATACATTAGTAGTTATAAAAAAAATACAAACATATTATATAAATACATTACAAAAATATAAAAATAATGAAATAAAAAAATGTACAAACGATTCAGAATATTTCTCTTCCCTAATTAATACATATAAATATCATTGTGAAGAATTTTTTATATATCCACAAATAAATAAACATCTTGAAAAAAATTATGATATACAATATTTTTATAACTTGTTAAAACAACTAGAA…	2070	753	-0.0744587
PF3D7_1130800	PF3D7_1130800-e1o2	ATGAGCAAAGTTATTCAGCAAATATTTGAAGAGTACAATAGATCTAGGATTCAGTTCACACAGAATGTTTGTGATTATTGTTTAAAGTCTCACAATATAGAAATATTAATAAATACAGATATCATAATTTTATTACGCCCTTTAATATTAGACAAGGTACCCATCGTACAACAAAATGCTACTTTAATTTTAGGGAAGCTAGCTAGCCATTCTGAGGAAATAGCATTAACAATTCTTGAGAACGATATATTACCACATTTAATATATTGTTTAAAACATGAGAATAAGAACTATAGAAAGAATAGCGCATATACATTACAATGTTTAGCTAGGCATAATGAGAAGTTAGCAAAAATGGTTGGAGAAGATAATTGTATAGATTATTTAATAGATGGTTTA…	1377	753	-0.0748914
PF3D7_1435300	PF3D7_1435300_e1s2	AATGAAGCTTTATATAATATGTTACTTCAATTACCTGATTTTCCACATATTATAATTGATATGACGATAGATTTGGATAAACTACAATCCATGATGATTAATGTAAATAGTAATTTTTCACCTAATAAAGATGGTGACCCTAGTCAAAACATTCACAACAATATTGTTAGTAATAAGAATTCGGAAGATCCTTCAAAATTGGATGTGTGTAAAACAAAACAAGCAAAAGAGGAACATACTAAGAAAAAGCATATATCATCTAAATATTTAATTAAATTTATTGATAGCGTTAATTCTAAAGCTGAAAATGCTATTAAAAAAGGATGTCAATTAATCATTTTATCACATAATAATGTTAATGAAAAGAGAGTGCCCATATTTTCTATATTAATTGTAGGT…	2373	712.5	-0.0766353
PF3D7_1234400	PF3D7_1234400-S1_C	ATGCTCGAGATGCTGTTTCTGCTGCACATTTACATCCCTCAGAACTCAGTAGCGTACGTTAGCAACGTTTTCCCGATGACCTACATCTATCCGAGCTTCACCTTCGTCTCCTTTCTGCTGTTCAGCTACCTGTTCAGCCACTTCACCTATATTTTGAAGTATGAGAAGAAGATCATCAAACGTATTCTGTCTTCAAACTCTTTGCATGTGGTCCACAACTTCTCGTTCGTTAAGAACGATATCGAGCGTAACATCATTAAAGACGATAAGAACGACGAGAACATTGATAACATCAACAAGCAGTATATGAGCGACGAGGAGAAGATCGAGAAGAAAGAGAAGATCGAGAAGAACGAGAAGATCGAGAAGAACGAGAACGGCGACCACCCTCAACTGTTC…	1583	759.5	-0.0783974
PF3D7_0212400	PF3D7_0212400-e3o3	AAAGCCAACGATAACAATTCATATGTACCAATATGCCTTGATATTTTAAATACAGAAAAAGAAAAGAAAAAAGAAAAAATACATTACACCAGAGGAGTAGGTAAATCCAATTTTACGTATTATCTTAGTGATAGCAATACACGTAGTGAAGAGTCCGCTTATCCTGGAGAAATTATTCAATACAATAAATCAATTGATGAATATATAAATACAAAAAGAGTTTATAAAAACGATCACTTATTTAATTTCTTGCCAGAAATTATATCATTAAAAACTTATTATAATATATTAAAAGAAATTTTAGAAAGAAGTGCATTCTTAGGAGCATTCGTCTTAGATAAGCTGAAAAATTCAGACGAAGATTCATGTTTAAAACAAATACTTGTAAGCAATATTTTT…	510	750.5	-0.0792856
PF3D7_0323800	PF3D7_0323800_e2s1	GAAGTGGATTATGTGATTAATGAGGAAATATATAATAGAGAGAGTGCAAAACAAGAATGTTTGAAATATGATATGTATGAATTATTATTATTACGTTTTTTAAAATATGAATGTGATTATGATGATTCGGAAGATATATTAAATAAATATTGTTTTATAAGAGAAAGGAAATATAATAAACCAGGGGGAAATAAATATATACCTAGAGACAGAAGTAATAATAACAATAATATAGGTAATAATGTAAATGGAATGAATAATTTTGTTTTATTAAATAATAATAATAATAATATGAGAATAAGGAACACATATAACAACAACAATAATAATATTAACAATAATAATAATAATAATAATAACAATTTTAATAATTTTAACAATAATAATAATAATAACAAT…	2655	750.5	-0.0802584
PF3D7_1205900	PF3D7_1205900_e1s1	ATGTTAAAAAATAACTTTAATCCTGATATTAGTGATGATGATTATGTAAGTGAGAAACAAATATTTCAAGGATCCAACAAAACTATATTAACTGTAGAATCAATACATGTGGTAAAAGGTATAGATAAAGATATAAAGAAACAAATAGAAGAAGGAAAAGTTTTTTTGAGTGATATAAGTCCAGTAAAGAATGCAGAAATTGAGGAAGCATTTTTAAAAAGTTTATGTAAAAGTTCTTCTACATGTTATGATAATAATAATAATAATAATAAAATTTTTCATCATCATTTTAATGATAAAAAAAAAGATTATTCTAATGAAAATTCTTCGGAAGAAATAAATATAAATATAGAAGAAAATTATGATCGGTTTAATATAGATAAATCAAAATATTATAAT…	1653	750	-0.0805233
PF3D7_0523100	PF3D7_0523100_e2s1	CGTTTATATGTAAAGTGCGGATCCAGATACGAAGAAATAAACGACAAAGTAAATGAACAAGGTATGAGCGTAATGCTTGAAAATATGGCTTTTCATAGTACGGCACATTTATCTCATTTAAGAACCATAAAATCACTCGAAAAAATAGGAGCTACTGTTAGTTGTAATGCATTTCGTGAACATATGGTTTATAGTTGTGAATGCTTAAAAGAATATTTACCTATTGTTACTAATTTAATAATAGGTAATGTTTTATTTCCAAGATTTTTATCATGGGAAATGAAAAATAATGTAAACCGTTTAAATTTAATGCGTGAGAAATTATTTGAAAATAATGAATTATATATAACCGAATTATTACATAATACTGCATGGTATAATAATACCTTAGGTAATAAA…	1230	757.5	-0.0819314
PF3D7_0818700	PF3D7_0818700-S3_C	ATGCTCGAGAGTGACTACATGGACCACATTCAGACAATCAAGTCGTCGCAGTCTATTAACAAGAACGACACTATTTGTAAAGAGGAGAACAACATCAACGTGAACGTTTTCATTAAGGAAGAGCAGAACTACCACGACATTGGAAAGGAGACGAAGCGCCACGACGACAATAACAACAACAACATCAACGACGGCGACGAGAACAAGTTCTGCTTCAAGGAGAACATCAAGAAGCCTAACGACATTTACAACGAGGACATGGAGAACTCGGAACGCACCAAGGACACTAACTGCGAGTACAACAAGAAGAAGAAGGACGAGGACGACGAGGAGATTTGCCTCACCAGCAGCACATTAAGCACTAGCTCAGTGGGCACCCAGAACGATGCGGGGCACCAG…	854	757.5	-0.0823741
PF3D7_1324300	PF3D7_1324300_e1s1	ATGAACTTATTTAATATATTAAGGAACACCTCATTTGAGATAGATGCAATAAAAATAAATTTTCTCTTCTTTAAGAGTTTGATAATTTATAATGTACCTTTAAAAAACATTGAAATAAGAAAGATTCTTTTTCATTTTTATTTTATAAAAAGGTTCCTTTCGTTAATCTTTAACAAGCACGCAAATGAGGATGACAATAATAAAACTGAAATAAAAAAAAAAAATAATAAAATAAAAAAAAATAAAATAAAAAATAATAATAATAATAATAATAATAATAATAATAATAATAATAATAGTAGTAGTAGCAGTAGTTGTTGTAGCAATAGGAATAATGACATATATGATAATTATAATCATCATAATGATAATAAAATAGATAATTATAAAAATTTGAAA…	2637	752	-0.0825609
PF3D7_1130700	PF3D7_1130700_e1o1-s3	TTTATACCCTATGAAAATTTTGTATCAAATTTAAAAAAAAAAAAAATAAATAAAAATAACATAACAGAAGAGGTTTATACAAGAAAAAACGAACAACAAAAACAAAAACAAAAACAAGGTCGTGATGGTGGTGGTGATGGTGATGTTGGTGGTGATGGTGATGTTGGTGGTGATGGTGATGTTGGTGGTGATGCTGGTGGTGATGATGATGTTGGTGGTGATGATGATTATGATTATAATGATTTTCAAAATACAGAACATGATACACACCTTGGTAACCATAAAAGGAGTGTGTCTTCCTTTAATAATGTAGACAAAGTTATTAATACATTTAAAAAGAAAAATATAATTTTAGCAAATAATTGTCTTGTATGTGATCAAGAATATAAAATAATGTTT…	1500	758.5	-0.0830335
PF3D7_1117300	PF3D7_1117300	ATGCTCGGGCTGATCTTCAAGGTGGTGATCTTCATCGTCGGATACGTGCTGCCAATTGGCCTGTCGCTTCATGGCTGGAAGAACAAGAAATACGAAATGATCGAGTACTACCTGAAGTACGTCTACTTCTTCGTCATTTTCGAGAACCTTGTGACCCCGAGCCTGGGCCGCGTGATTTACCGTATTTCGTCATTTCTGTGGTGTATTCTGCACCTCACGATTTACATCATCCTGATTACCCCTAAGCTGAACTACCTCAACAGTATCTACGACAAGATCTCTAAGATCAACAACCAAAACAACATCGGCCTTTATTGGAACAAGTACCTGGTTAACCCGCTGAACGACAAATTCAATAAGATCGTGAAGAAGCTTAAAACCCTT	384	749	-0.083417
PF3D7_0905000	PF3D7_0905000	ATGTTGAAGTCATGCAAAATGCTGAGGATTTTATATTTTAATAAAATAATCACAAAAGGGTTGTGTAGTAAAGGATTCATATATAAGAGGCTATGTTTTCGTAATTTTAATTCTATTATTAAAAGTGAGAAGAAAGTTGATAATAAATATATTTATAATGTATATAAATTAAACGACATATATTATAACAATTTAAAGATAATAAATACTTATGATGAATTTTACAACTTAATAATAAAGAATGAATATTTTAAAGACTATACACAAATAAGAAATAGGTTTTGTAAGGAAAAGGATGATATAATAAATAATGAGAATACATGTGATGATACATTGTATAGTGATAAGAATATAATGGGAAAAAAAAATACAATATTAAATGATGCAGCAAATAAAAGA…	843	748	-0.0841057
PF3D7_0628200	PF3D7_0628200_s4	AAAGAACAAAGTCCTGATATGAAAAGATATAAAGAGGTTCTTAGAAAGAATAATGCTCCTAATTTAGTTTTTTATAGTGATAACGATGGTTTAACATCTAAGAATAAGGAAAATCCTGAGAAAAATCACAATCCATTTTTGAGTGATAAAAATTTTTCTGATTCTATATATAAAAAGAAAAAAAGTCATGATTATAATTCATCTAGCCACAAACTGAAAAAAAGAAAAAACAAGAAAAAAAAAAGTAAAAAAAAAAGAAAAAGTAAAAGTAAAATAAAAACAAATGCTCAAGGAATATATGAGGAAAGTGAAAACGATGAAGGAAGAGATCACTTTCAATATAAAAAAGGAAAGGAACAGTTTTCTAAATTTATAGGAAAACATAATTCTATGGGTTTT…	2340	746.5	-0.0847596
PF3D7_1446900	PF3D7_1446900-e3o3	CAAATTAAGAACAAGTTAGAGACCGTACTTAATGGAATTGCCATAAGACCCGAAAGTAGGCAAGATGAATTACCCACCTTGCTAGTTACCGGAAAATTGTGGTCCAATATTTTTGAAATAACATTTGTAAGAAATAAGAATGCATTTGCTCCGAATGTATTTTTAAAGGAATATTATAAAACGATAGGTAACAAAATA	198	750.5	-0.084854
PF3D7_1017000	PF3D7_1017000_e1s1	ATGGAAGAACTGAAAACTTGCCCATTCACAAATGTGATTCCGTACGGGTTGCTATATGATAAATTAAAAAAAGAAAAAAATAATGACGTTCCTGAAAATTATGTAATAGAAGAATTTGATAAGCTCTTGAAAAATTATGAGAGACCAAATGTATACGATGAGATAGGAAATGCAACATTTAAGAATGATGAAGATTTGATAACGTTTCAAATAGATTTGGATTATACAGTAGAAAATATATTTAAAAATATGATATATAACGAAAGTGGTTCAAATAATAGTATATTAAATGATATATATATGCCATATAGGATTTTATTAAGTAAAGATAAAAATTATGTGTCTGTTCCTATTATTCGTATATATAGTTTAAGAAAAGATGGATGTAGTGTTTTAATA…	1671	757.5	-0.0855952
PF3D7_1344200	PF3D7_1344200	ATGAGACCTCGTTTTTTTTTGTTCCTACTTTTTATAATATATATATATAATAGTTTAAGAATAAAATGCTCATCCTTATTAGGTATCGATTTTGGTAATGAATATATAAAGGTATCCATAGTATCTCCTGGTAAAGGATTTAATATTTTATTAAATAATCAGAGTAAAAGGAAAATAACAAATTCTATATCTTTTGCAAATAAGTTTAGAACATATGATGAAGAATCTAAGATTTACAGCACAAAATATCCACAATTAACTCTACTAAACAGTAATAATATATTAGGTTATAATTTATTTGATTCATTAAAGAATAAAGAGAATTTCGTAATTGAAAATTATGATGAAAATAATGAAGAATTTTATAGTGATATAAATAATTATGATTTTTCGAATGAT…	2796	749	-0.0856928
PF3D7_0508200	PF3D7_0508200-e3o4	TATCCTGAACAAAAAACGTCCAACTTAATTCACCTGTACTATTTTTTAAATGGAGGATATTTAATAACATCTGTATATTCACTTTTAATATCTGAGAAATTACCAGACTTTTATGAAAATTTTTTACAACATTTATGTGCAATAATATTAGTTTATTTTTCCTACAGTCAAAATTTTATAAGAGTTGGGGCCATAATTATGTTGTGCCATGATATATGTGAAATATTTTCATCAGCG	237	758.5	-0.0861868
PF3D7_1455800	PF3D7_1455800_e2s1	GGAAATGTTGTACAAAATATAATTTTCAATCATGTTATTAGAGCAAAATCTATTAAGGTTAATATGAGACATGCTATTCATGATTATTTTGGTATAAATTTTACCAACGTGTTAGGTTCAAGAGATCCAACCTTAAGAATCCAAAGTGGGATGTCTAGCTTGACACAAGATCTATGTTTACAAATCGATGAAAAGAATGAAGTGGTTTTAGATGGATGTATTACTGCTATATCCTATTTAGATGGTCGAGATTTGTGGAAATTAAATTCTAAAAATCAAATATATAATCCAATTAATAATCTATGTATAACATTAAAAGATAATTTAATAGCAAATGGTGGTAGACTCATATTAGAGGATTGTAATGCAAGCTTAGAACATAATGATGGACGTAGTAGT…	2262	747	-0.0862331
PF3D7_0301600	PF3D7_0301600-e1o2	ATGATAACTAAAAATTATAATATATCAAAAAATGTTATAAGACAGATAGGAATAGGAGTGAATAAATCTATTTGTTTTACATGTAAAAATATAAATATATTGGGAAAATGTCAGAAAATATGTATAAAACATTTTTTGATATTTAATAAAATTCTGTTGTTATTTATTTTAGTATGGATATTTCAATATAGTAATGAAGAA	201	758	-0.0863746
PF3D7_0513800	PF3D7_0513800	ATGACTGAGAATAGATCAAGAGATTATGATTATTTATATAAAATAATATTGATAGGTGACAGTGGTGTTGGTAAATCGTGTATTTTATTACGTTTTTCAGATGACCATTTTACAGAGAGTTATATAACAACAATCGGTGTTGATTTTAGATTTAGAACAATAAAGGTTGATGATAAAATTGTGAAATTACAAATATGGGATACTGCTGGACAAGAACGATTTCGAACAATAACATCAGCATATTACAGAGGAGCTGATGGAATAATAATAATTTATGATACGACAGACAGAAATTCATTTTTACATATTAATGACTGGATGAATGAAATAAATAAATATACGAATGAAGATACTTGTAAATTACTTGTAGGAAATAAAGCAGATTGTAAAGATGATATA…	621	756	-0.0869567
PF3D7_1444100	PF3D7_1444100_e3s1	GGAAAATATTTTCTATTACCAATTCGATGTATGAACGATCAAATAATTTTGAATGTACAAGACGAAGTAATTATAGATGATACACCTATATACATGAAGAGTGAGAAAAATATATCAATTAAAAATATAGGTCAATATGAAAATAAATTTGAAGTTATAATAAATCCTCCCTTTTATTTGAGCGTTTCATCGTCTATTCATTCTCTCAAAATAGGGGAAATGGAACAT	228	746	-0.0880471
PF3D7_0818700	PF3D7_0818700-S1_C	ATGCTCGAGATGGACGTCTTCGAATTTGTTGATCCTCTGCGCAAGCGTAAGATTAACAATAATATCCTGGACTTCAATAAATACGTTTACAAGGACAAGATGGAAGTCGGAGAGGAAGAAATTGAGCACGATGAGGAGAAGACGAAGGACGACGAGATTATTAACATGAAGAAGAAGAAAAAGAAGAAGAAGAAGAAGAAACTTCGTCGCCTGCTGGACAGCAGCTCTTCGGACGACAACAACGAGAACGAGGAGATCTCTTCAAAGAAGATCAAGATCCGTAAGCTTAACAGTGACAACGAAGACAACAAGTTGAAGAACAACAACAACGAAAAGAAGAAGAAGGAGAAGGTAGAGGACGAGAAGCAGTCAAACGACATCGAGATCCTGGACTCGTAC…	1583	748	-0.088802
PF3D7_0411900	PF3D7_0411900-S3_C	ATGCTCGAGAAAGACTTCTTAGTTAACAATATCAATCTGATTAACTGCTCTAACATTCACCTTTACGACGCACAGTCAATCATCGCCAATAACCTTAACACTTACGTCAATTCGCAGATCTTCTGCATCAACGAGACAGTTAACGTGTGTAACATCCTGCAGATCATCGAAAAGACCCGTGACCTGACGAAGCTCTCAGGTTATATCTGGATGCGCTCTCTGCTGTGCTACACGTCGGAGCGTGTGGAGTTCTTCCTGCTGCACGAGTACAATAAGAAGAAATTCATCACCCCACTCATCAAGAAACGTACCAAGAAGATCGAGACAAACCAGATGAAGAACAAGAATACCGCGAAATACTTAGGTGGTCTGGTGCTGGACCCGCTTTGCGGGTATTAC…	1583	754	-0.0896328
PF3D7_0731100	PF3D7_0731100-e1o2	ATGCTTCTTTTTAAGGATCCCCAATTTTTATTATCAAAAAAATCAATACGTTTGAATAATGTTGTAAATAATAAGAAATCATCGATTAATTTATACAATAATAAGGAATTTAAGAAATATGATAGCAGAAATTTTGTAACATTCTTTTCACCTGTACATTCTGCTTTGTCTGTTCTTACATTAGTTGTATATATAGTATTACTA	204	745	-0.0899202
PF3D7_1136100	PF3D7_1136100	ATGTTAAATTTTTCTTTCCTATTTTTCTTTTCATATGCTATTTTCTATAAACCTTACCTGTGTAAGAATTCTAAAGGGAAATATCATGACCATTTAATAAGAGATTTCACCCATTCAAAGGATGATTTAATTAATACATGTTTAGAAGTAAATAATGGTCTAACGTATTATGAAGAGTTATTAAAAAATTATAAATATGATACAAATTGTTTAAAATATAAATATATAGGTAATTATGTTTTGGAGAAATATCAAATGAATGAATTTAATTGTTACGAAAAAATTCAAAAAGCTTTATGTAAATTAAATTATATAAATAAAGAAAATGTAGTTGTTGACGTGAAAAACAATAGTGAAGAAAAAAAGGAAAAAAAAGGATATCATTTATGGGAAAATAAT…	1806	745	-0.091156
PF3D7_1403800	PF3D7_1403800_e1s2	CATTTAGATATAAATGTAGATGTGAAATATATTACGCTAAATACGATTGACATAGATGAGACGATAAATAAGGGTGTGTGTCCTTATAAAGATATGGAAGATAATTATATATCGAGTGAAGAACATATAAAGGATATAATTATATATAGTGATATACTAAAAACAGAAAAGGAAACATTTTTATATAATCCAAATGATATCGAAAAGTATGATAATAATGATGATAGTAATAATAATGTTAGGAAAATCCCCGATACTATTATACATTTTAAATCGTCTAACGAAATAAAAAATGATATTATAAAATTAGTAGGTATATCCATATTTGATTGTATACATAAATCATATGAACCTACCAAATCTTTAATAAATGATGAGAATCTTGAAATATGGTTTACG…	2199	745.5	-0.0915304
PF3D7_1223400	PF3D7_1223400-S4_C	ATGCTCGAGATCGGTTACACGACCTACTACACTACCGCCCCTTTCCTGAGTTTGCTCCTGGACATCAAAATTAAGAAGAACCTCATTTACCTGTATCCGGAGATCTACAAGAATAAGAAGCACAAACGCAAGCTGGACCTGAAGTCCTTCTTCATCATCGTATGGATCAGCATCTTCCAGGGCACGGTGGTGATGCTGGGTGCACTGAAGTTATTCAACGACAACTATAACAACCTTATTAACATCTCATTCTCGTCACTGATCGTGCTCGAAATCATGAACATTCACCTGGAAGTGGAGAGCTGGCACCCACTGATGATCTCCGCGAACATCTGCTCATTCATCGTCTACATCTTCTCGATGTTCATCCTGCGTAATTATTTCGACATCATGCAGATC…	590	747	-0.0917369
PF3D7_0422100	PF3D7_0422100	ATGTATCACGTGACACGATCGTTCGTGTTATTCTTGATATTATTCATTTTTTTTCATGTTGCAGGAAATTTTGTGCTCTCGAATGCCAATACAAACAATGTCAACAAGAACGGGTCGAACAAAAAAAACAACGCGAACAACAACAACATGAACAAGTCTGGGGATAAGAAAAAAGCGACGAAGGGGAAGAAGGGCAATGCGAACGACAATGTAAATGAATTTAATTTCAACTTCAACGACCTGCTGAACGAGATAAACAACACGACGACCAATGACAACAATAACAACAACAACGATAATAATAATGATAACAATAATAACAACAACAACAACAACAACAATTATAACGGCAAGAATGAGATCAATGAGAACAACTTTAACGAGGAGTACAATAAGCTG…	1155	739	-0.0919664
PF3D7_0217500	PF3D7_0217500_e1s1	ATGGGGTGTTCACAAAGTTCAAACGTGAAAGATTTTAAAACGAGGAGAAGTAAATTTACGAATGGAAATAATTATGGGAAAAGTGGTAATAATAAAAATTCGGAGGACCTAGCGATAAACCCAGGTATGTATGTTAGAAAAAAAGAAGGGAAGATAGGGGAGTCCTATTTCAAAGTTCGCAAATTAGGTAGCGGTGCGTACGGAGAAGTATTATTGTGTAGAGAAAAACATGGACATGGTGAGAAGGCTATTAAGGTTATAAAGAAGTCCCAATTTGATAAGATGAAATATTCGATAACAAATAAGATCGAATGTGATGATAAAATACATGAAGAAATATATAATGAGATATCATTATTAAAATCATTAGATCATCCTAATATAATAAAATTGTTTGAT…	1218	745	-0.092681
PF3D7_1406800	PF3D7_1406800-e1o3	ATGTGGTTTACAACTAGACAAGACGGTCTTGACGATAATTGTCATACCAACAGAGGTCCATGTTTTCAAATTAGTGGTTTTTTTGGAACAACATTAAGAATTGGTTTTTTTCTAGAATTTATTGCATTGACCTTTTTATTTATGTCTTATTGGTCAAATGGAGGAAAAGGATTATTTAGCTATGATTTAAAAAATATAAATGATGAATATAGACTAGATCAAACCTTCAGAAATTCAATAACCCTATGGACAGGTGTCTATTTAATAGGGGCAATCTTTATCATGTCCTTTCAAGTTCTCCTTGCGGATGATACA	315	752	-0.0941347
PF3D7_1015200	PF3D7_1015200-e1o3	ATGAATCTTTTCCTTTTTATATGTATAGCATTATTTATATATTTAGATAAATTTCATTTACCTAATTCATTAAAGTATAATTTCAAAAGGAGTTTATTATTAAAATTAGGACATCAACAAACAGTTCTTTCTAAAAATAGTGAAGCCACAAAAAGTGGGGGAATGTTTTTTATACGAAATTCATTTCTTTATAGAAATAAGAATTTTCTTAAA	213	752.5	-0.0946662
PF3D7_1007200	PF3D7_1007200-S1_C	ATGCTCGAGATGTTGGATTCAGATGCGGAAGTGCCCCAAGAGGTGTTAGCGGAGTACGAGAAGTTGCTGAAGCGCAGCTACACCGAGAACTTCGATGACCTTTACAAAACCGACCTCTTGAAGGTGATTGGTAAGGACGGATATGGCAGTCACATTGTGCTGTTAATCCCTTGCTTCATTGTCGCGGCAGGTGCCGACCCAGAGAAGACACTCCGTTACGCGATCCTTACACTGGACCCGATCGTAAAGGAGAACTACGTACTGATTTTGTGCGAAACGCACACCAACTGGCTTACGGACGCAGTTTACGCATACGCCAAGCAGTGGTACGACACGTTGCCGCGCAAGTATAAGAAGAACCTCAAGAATCTGTACTTAGTCCACTCTGGGTTCCTTAGC…	1583	744.5	-0.0946867
PF3D7_1327300	PF3D7_1327300_e1s2	ATAAAAAAAGATGATAATACAAAGCCTGCATTAAACATAAAACAAAATATCAAACTTCCATTAGGTCCAAAACAAAATTCCAAATCTGCATTAAGCTCAAAACCAGGTGTAAAATCTTCATTAAGCTCAAAACCAGGTGTAAAATCTTCATTAAGCTCAAAACCAGGTGTAAAATCTGCATTAAGCTCAAAACCAGGTGTAAAATCTGCATTAAGCTCAAAACCAGGTGCAAAATCAGTTCTAGGTATAAAATCAAAGACAACCATGAAAAGTAGTGCAACAACTTTCAAATCGAAAACATTTGTTAATGGATCTTTAAAAGAAAAAAAGAACTTAAAAAATGATATAAAAACTGGAGAATTAGCAAAAGGAGGCAATAGTACTAATATAAATAAAAAT…	2715	745	-0.09496
PF3D7_0914200	PF3D7_0914200-e3o4	CTGATATACCCCTTTTTGAAGGGCAAATCGGATAATTTGGAGAGCTCGATTTTATTTTTATATCTTAAATTTTTAAAACTTGTGTGCAGATTAGCTATATGGGTCTTTGGTGTGAATAAAATCGAAAACAACTATCTTTGTGATAATGAATGGCCCAAGAACATTGTATCGAATCATATATCTGCCGTAGATCCTCTTTTTTTTATAAGTGAACATGCATGTAGTTTTGTGGCAAAAAAATCGTTAAGTAAAGACCGTATGGTTGGTCCGAGTGTTTTAGCTTTAAAATGTGTACTTGTATATAGAGAAAAATCAGAAGATAGAAAAATTGCATTAGAAAGTATAAAAGAAAGGCAATTATTAATTAATGCTAAACAAAACAATTATCCATCATTTGTA…	573	742	-0.0956895
PF3D7_0209200	PF3D7_0209200_C	ATGCTCGAGATGCTGAAATACCGCGCACCTCTGCCCCACTTTAACTGTAAGTCTAAGTTCGACAAGATCTACGAGGAGAACCTGAACAACGGCTCGTTTAAGCGTATTAATAACCGTAAGAACAATGAGATTCGCGACATGTTCATTAAGCTGGGTGAGGACGAGAATTTCGGCAGCTCGTGCTTTTACTCGCTCGGCAACACCAAGATTCTGACCACCGTCTACGGGCCGAACCCGGACAGCAAGTATGCGACCTACTCCAAAGGCAAGGTCTTCCTGGATGTTAAGTCGCTGAACATTAATACCATTGGCGCCTCTGACCGCCAGCGTGACGACGACATTAAATCACTGCTGATCGAGTGCATCTCGAACATCATCCTGTTAGAGAAGTACCCGCAG…	908	742	-0.0966072
PF3D7_1002100	PF3D7_1002100_S2	GGCTCCTCTGGCGGAAAGACCTCCTCCAATAAGGAGAGTAACGAATCGAATGAGCCCACGAAAAAGCCGTCTAAATACACAATGAATTTAGACTCGCCGCTACTTAAAGGAAGCTCCGGGGGAGAGACATCCAGCAATAAAGAATCAAACGAGAATAATGAACCGACGAAGAAGCCTTCAAAATATACTATGAACTTGGATAGCCCGTTGCTGAAGGGCTCGAGCGAGGGTGAGACGTCGAGCAACAAGGAGTCGAACGAAAGCAACGAGCCTACAAAGAAACCAAGTAAGTATACGATGAACCTGGATTCACCCCTATTAAAAGGTAGTAGTGGTGGAGAAACTTCCAGTAATAAGGAATCCAATGAAAACAATGAGCCAACCAAGAAACCTTCCAAG…	918	742	-0.0973396
PF3D7_1433200	PF3D7_1433200_e1o1-s3	ATAAATAAAAATTTACTATATCATAATACTGATCAACAAAATATAAACACATTTGATGATAATCAAAATTATGTAAAGAATCAAGAATATTTAAATGATGAAAACGGTATACATGATTATAAAGCGTATTATGAATTTAAAGAAATGTACCAACAGAAAAATTATGAACATATTATCAACAATTTTATACATTCAATTGTGAAACAATTAAAACCTTATAAAAAAAATTATTATAATAAGATTATTAAAATAATAAAAAATAATAAACTACAAAATGTATTTATAAATATATTTAGAAAACAAACAAGTTATTTACAAAACAAAAATGTTCAAACATATAAAAAATTAGAAGAATTACCTAAATGTGACGAAAATAAAATAAAAAATAATATAAACGAA…	894	741.5	-0.0976161
PF3D7_0903500	PF3D7_0903500_e1s2	ACGCTAAATGAGAAAGAAAGTACCACACAAACAAAGGATGAAAGTGTTTCCAAAGACGAAAAATTAATAGATATTAAAACTCAAAATGAAAAAACAGAAAAACCGAAAGATAACATCTTTGGAAGTACGTCACTTTTTGGATCATCTATTTTTAAAGCAAGTCCATCCAAAGACAATGTTACATCAAACACAAAGGATAAAAATGAAAGCACACCAACAGCTAATATGAATACTACTACTACTACTAGTAATAATAATAATAGTAGTAGTATTTTTAGTTTTTCTGCTGCTAATAATAAAAGCTCCCTATTTTCCAAAGATAATAATAATAATAGTAATACATTCTCCTTTAATTTGAAACCACCATCCAATGATAAAAATGTTACCACTCCTGCCTTC…	2100	741	-0.0977061
PF3D7_0114100	PF3D7_0114100-e2o2	GTAGTAGAAATTGGAACATACAAATTATCATACCATAATGGAGGGATACAATTCAGAATGTTAGCACAAAAAAACACAAATAAAAAACCATTCGGAAATACCTTAACGAATATATTGTTTAAGGACAAAAAAAAAAAAAATCTTGATCCTCAAATTTCATCTCTAGTCAGTTTAGTAGATAATATGAATATAACTCAAGAAAAAAAAGATAAAATCAAAAATCTCTCATTAAAATATATAAATAGTAGAGATGTAAAAGAAAAAAATGAATCAATTAATGAACTTCAAAAATATAGTAATAACGAAGAATGTAAAGAATATATGGATAGTTATTTAATGCATCTTCGTATGCAAAATGATATAAAATGTTTAAAAAGAAAAAATTTGTGGAATAATATT…	615	750	-0.097716
PF3D7_1130700	PF3D7_1130700_e1o1-s4	CAAGTTGATATAAACCAATATGCTCAAACGAAAAACAAAAAAGAAAACGACAAAAATTACAACAATAATAATAATAATAATAATAATAATAATAATAAAAAGAAGAAGAAAAAGAAAAAGGAAAGTAAAGGTAAAAGTAAAAGTAAAAAGAATCATATGTCCAGTGATCCATATCAAAAAAGAAAAAGCAAACTACTAGAAGATAGTGACAGTGAACAAGAATATAATACATCTAATAGTAATAATACATCATGTAATATCTCGGAAGAAGAAAATGATATACATGAACATGATGAAGAAGAACAAAATAACATACTTTTATCGAATATATCATTCGATCTTTTATCAGATGATTTAAAAAATATGGAAAATGATAAAGATATAAACAATGAAAAAGAA…	1092	741	-0.0978375
PF3D7_1360200	PF3D7_1360200_C	ATGCTCGAGATGGACGCGTTGATTCTGGACGAGCAAATTCGTATTTACGCACTTCTGCCGATCTTCGTTATCGTCGTGCTGGTTTGCATTATTAAAAGCAATCTGGCACAGATGATCCATCCGGGCCCGAAGACTGACATGGAGAAACTGAGTCAAAACAACTACCTGAGCCGTTTCGACCTTCTCAAAAGCAACAACGGTCTGCTGTCACCCCTGGCGTTCATTTCACGCAAGCTGTTCTACAACAAGCCAGAGGTAGGTTACTTTAACGACCTGCCGGAGCAGGCGAACCCGTTCGACGCCCTGCTGAAGCAAGATCCGTCCGATCTGTTCGGTATGATGAAGAACCAGATTCCGTTCCTTGTGTTACAACTGGGCCTTGGCTTCTTGATCAACCTG…	854	752	-0.0979268
PF3D7_1369400	PF3D7_1369400_e2o2-s6	ACATTTGAAGAGTTATTATGTATTTTTGTTAAAGTTCAAGAATATGAAATATTTCAACATATGTATATTTTTTTATTTAATATTCCATCCTTTTTAATAAAAAATTTTAATTTTGCAAAGTTATATGAATGTATTGTTCAATTAATGGATGCCTATTTTAGGAAAAAGGATATACATTCGGATGAAATAATTATTTATGATAATTATTTTTTACTTCATTTTTCCAAACTTGCATTATGTGTTTTTTCTTATTTCTTAATAAAAAAGGACAGGAATAAGTGGTTACATTTTTACAACTTTGAATATTTAAATAAGTATATCAAAATGGGAAAGCTGAATGATTATACATTTTGTTTAGATAACACACAAAAGGAAAACTATTCGAATAGAAATAATGTT…	1233	748.5	-0.0999688
PF3D7_0508000	PF3D7_0508000	ATGAAACGCTGGTCAATCATTACAGGAATCGTTATAATATTCTGCATATTAACATGTAAAGGTCAAGTAGAAAACAAAAAGGTTGATTTTCGAACAGAAAAAGGAAAGTTCGTGCCTTTAAATCTAGTACCAGGAGATGTTGTAGAATATTCGTGTCCGTATAGTTTAAATAATGATATCCGAAATATGAATGGGGTTGAACGAGAACATTTCGACAATAAAAAATTTTGTTTTGATTATATATTTGTTGGAAGTAAGTTAACATTTTTAAAAGAATATGTTCGTGGTTCTTATAATGTGGTACATAAAGAAGAAGGGAATTTATATACATCACAATTTAGTGTTCCTCCTGTTGTTTTAACACATCGAAATTTTGATTGTTTTTGTTATATGGAAGAA…	1047	749	-0.100527
PF3D7_1251000	PF3D7_1251000_C	ATGCTCGAGATGACCAACATCTTGTTATTCTTCAACATTCTGTGGATGAGTACCCTGTTCGTAAGCGCCAACGTCGACAAGGAAGTTCCCACCGTCAAGTGGGGCCAGAACTCATCCCAGCTGACTCTGATCGTGAGCATCCCCAAGATGGAGAAGGAAGAGATCCAGTTTAAAGAGAACATCATCTACGTTAGCGCCATCAACAAGGATGGTAAGCACTACGAGCTGATCCTGAATCTCCTGCGTCCTATTATCCCGGAAAACTGCAGTTACAGCGTCTTGCAGAAAGGACTTAAGCTCAAAGTGCATAAGCAAATTAAGGAACCTTGCTGGAAGCGTTTAACTAAAGAGAAGGAGAAGCAGCACTTCCTGATTAAAGACAAGATCCTGGGCGACGGC…	641	740	-0.100941
PF3D7_0518800	PF3D7_0518800_C	ATGCTCGAGATGGCGGTACTGTTCTTCTTATTTCTCAACATGCTGTTCTACAGTACTAACTGCGAGCAGTCCGAGATCCTGCCTCTGGGCGACATCATTAGTAGCGTAGCTGACATCACCAACGCGATCACATCGAACCAGAAAGAGGGCAGCATCAACGACGCGGTGACCGACAGCCTGCCTAAGATCAATCTGAAGATTGTGCCGAGCAAGAAGCTGCACATTACCAAGAGCGATCTTGTGTTCTTGCTGAGCGAACTTCGCCAGGAGATCCGCCGCCAGATGGGGATTCTTGAGGATGAGCTTGAGGAAAAGGAGCGTATGCGTCAGCGTAGCAGTTCGCTGTGGAACGATAAAGAGAGCGCAATCTATACGCCGAACGAGAAAATCAACGAGTCC…	692	749	-0.101358
PF3D7_1432100	PF3D7_1432100_e4s1	CCTGGTTTTATTAAAAATCTAAATCTTTGTGGAAAATATACCAAAACTAATGGAAAAGAAGATGACACTTTTGAAGTTTATAGTGAATATACAACAGATGATATGAACATATTTTCATCTGTAAATGTTAGAAATTTTGCTTTTAAATATATTCATGTGAGCTCCCATCCAAAATATCGAAATTTTAAATTCGGAGGT	198	744.5	-0.101934
PF3D7_0713700	PF3D7_0713700_C	ATGCTCGAGATGTTTAAGAAATTCTTCGTGTTCATTACGTTCCTTGTCTTTATTATCAAGTACATTCACTGCGACATTATCATTGTGGACAGCAACAAGGACATTCAGGGCTTCGACCCAAACAGTGTATTGAATCTGTCCGAAAACGTCTTCAATATTTTCCTGGACACGAAGACCAATAACTCCGACATCAAGACTGTGTACAGCTCAATCTTCTCTAACTCGAAAGTCACTATCGACGGCACGTGCTCCAGCATGAAGGAGCTGATCAAGGGCCGTTCGCTGAAGTACCTCGACGAGTTAGGCACGGAAGAGTACGTCAACTCCGACGACGTATTCAACTTCAGCATCTTCGTGTACACAGTGAACGGGCAGCCGGACATCATTCAGCAGGTGTAC…	710	741.5	-0.102223
PF3D7_1023700	PF3D7_1023700	ATGAGCTTTGAAGATAAAAATTATTCTTTTAGTGGTCAAAGAAAAGAGAAAGGGGTTTCTAGTTACAAAGAAGAATTAATAAAATGTGAATCGAGTGATAAATGTGAATATAAAACAAAAATAAAAGTAAAGATAGGAAATAACCAAAGGATATTATTATTATTAAGACATTTGAATGAAGAATATTATTTAATATTACATCAACATAAATTAATAATAGGTTATCCTATGACATATAGAAAGATAGCACCTGAAAGATCTACATATCATTATAAAGCATTTTATGAAAAGGGTGATGATACATATGAAAACCAGAATAAAAGAGGTAAAGATAGATGTGAAGGATATAAATTTAATGATCAAGATCGATTAAGTATACCAATATTTGAAGATTTCAAT…	2271	741	-0.102385
PF3D7_0509100	PF3D7_0509100_e1o1-s4	TTAAATAAAAAAGATATAGAAACAAAACTCGAAAATAAATTATCTATATTGGAAAAAAAAACTCCAAATTTAAAAATTTTTCAAGATTATAATTTAAAATTATATGATTATAAAGTAAGAAGAAAAGATGTTAAAAAATCAAAAAAAGAAAAAGATAAAATTAAAGCAGCCTATGATAGTTTATGTAATAAGAGAAAAGAAGAATTTGTAGTAGCATTCAATGTTATATCATCCAAATTAAAAGAAATGTATCAAATGATAGCTATAGGAGGAGATGCAGAATTAGAAATTATTGATTCTTCAGAAATATTTAATGAAGGTATTTTGTTCTCTGTTAGACCTCCAAAAAAAAGTTGGAAACATATACAAAATTTATCAGGAGGAGAAAAAACACTAAGT…	762	739	-0.102393
PF3D7_0109850	PF3D7_0109850-S2_C	ATGCTCGAGATTTATAACTTCTCAAAGGCGAACTTCACCCTTTACACGAGCGCGCTGAATACCATTTGCATCGGCGACAGTATGGCGGCAATCGGCGGGATGTTGTACCCGTGGCCCAAGATCAAGAATACCAACAACAAGAGTTGCGCGGGCTCACTTTTCTTCTTCATCTCAACCTTCATCAGCCTGTTGGTGTTTAACTACCCGTTCGAGCCAAATTTCCTTGTGCATATCAACATTTTCTTCATCATTTCCATTTTCGGCGCGCTGTTTGAGGCATACATCCATGACATTGATAACCTGGTCTTACCGATTTTCACGTTCTGCATCTACCTCAGCCTGGAAAAGTACCCATACGATGTTCCGGA	422	739.5	-0.10427
PF3D7_0914200	PF3D7_0914200-e1o4	ATGATCAGGAAGCTGGAGTATCATATTATTTCCTATATAATATTTGCTCTTCATGTGAAGTTATTTATGCATACTGTATTTTATGCAGAATGGGTTTGGGATCTTTTTCATATATATTTTTGTACAATTATTGTATATGTTAATATACTTCTTATATATGGAATACGTATATATTTCGGCTTAAAAAAATTAGATTTAAAATATTTCCCCCTAGAAAAAATAGCATCTTGTACAAATTATAAGAATAAAAAAAATATCCATCCTTATGCAGCCTTCGAACGTTTAGATTTGATAAACATGAAATTTATGAACTTGTTTTATGGAATAATCTTTGTG	336	747	-0.104288
PF3D7_0912400	PF3D7_0912400-e2o2	TTTTCCAATCACATAATTAACGAGAATTGGGGTTTGATGCCTTACTCTTTGAGACGTTTAAGGGAACTAATAAAAAAAACGAAACCAAAAGGTTTATTATTTTTAAGTGGGGATGTTCACTTCGGTAGTATAATAGGAAAGGAAGAAAGTGTAATAGAGGTTACAAGTAGTAGCGTAAATCAGGAGAACATTTTTAGTTATATAAATAAATATGTTATATTTTTTCTAACAAATATATTAAGTAAGGTAAGTCCATTTGAGTTGAATAAAATATATTCATTTAATAATTTCGGTTCAGTTAATATTACATATGTGAATGATAATGAAATAAAAATTAAGACATCTGTAAATGATTCAGATGGTGTAGAAATCTTAGTAGCTAATCAAGTTTTTAATAAT…	609	737.5	-0.104528
PF3D7_0510300	PF3D7_0510300-e1o3	ATGTCAAAAAATTATAGTGAATCCCAATCTCTTACGGAGAATAATTCCGATAAGAAATCAAAAATAGATGATGATTTATCATCAAATGAAGACAGTAATTTAAGTTCAAATAAATTAAATAAAAAAAGCATTTATAGCAAAAAATCAAACGTTCAGCAATTGTTAGCAAGAATAGCACAA	180	739	-0.104645
PF3D7_1448600	PF3D7_1448600	ATGAGTGATATATATTTTTATTCTGAAGAAATTAATAATTTGTTAGAAGATTTTAAAAGAATATTACAAGAATTAGAAAAAGAAGAGGTAAAAAATGAAAAGACGGAAAAATATTGTAACGATATTCATTTTATAAATGAAAGAATAAAAACAGCCAAGGATGCATATTTTATTGAGATAAGGAATTTAAGTGAAGAGGAACAAATAGAAAATATTTCAAAAATAAAAAATAAAATGATAATATTAGAGAATTTAAATATTCAATTTGATTTTAAAAAAAGTAAACTAATATATGAAGAAGATAAACAAGCAAAAGAAAATAAAAAATTGTTAAAAGTTAGATATGTCTCAGCCAAAGATATAGAAACTAAAGGAGATATTATTCAAGATCAAACGGAC…	759	746.5	-0.106808
PF3D7_0210200	PF3D7_0210200-S2	CATTTTTCGAATGATCATACGCATTTCTCGAACGATCACACTCATAACTCCAATGACCACACGCACAACAGCAAAAACCACGCGCACTTCTCTAATGAGGTAGACAAAACTAACGATTATAAGTATCACTCTGAGAAGAAAAAGAAAAATAACGTTATTCGCAGTAAGATGTACAACATTAAGAAGCGGATTTCGAAGATCAATGACGAGCTCCATGAGCTATCGAACTTTTTCCTGATCGATAAAACGAAGCGTGAGAAACTAATGTTCGAATATAACGAGAATGTCTTCCTCGTCCGCAATATCCTGACGCAGGTGCTAGGCATCCGGAACAAGACCGACAATAGAGATATTAATCTAAACAATGTGCACTACGCCATCTTGCAGAATATTTTGGAC…	1746	736	-0.107856
PF3D7_0420500	PF3D7_0420500_C	ATGCTCGAGATGTGCGCGATGAATGTGAACCTGGACGAAGTGCATATCCAGTTAATCTGCAGTGACGACAAACACATTTACAACAACGTTAAAGAGGAGAACAAGAAGAAGTTAAAGGAGATCATCAAGCGTGTGTACATCGGCAACAGCGAGGACAGCAAGAACGCCCTGCTTCTTAATAACACCCATATCACACACATCATCATCATCCGCTGCTCCAAGGAAGACTACACTACACGCATTATCTTCCCGCACAAGTTTGAGTACTATATCATCGACCTGAAGAAGGAGCTGGACTTTACTAAGTGCAGCCACTTCAAGTTCCTGCTGGACGAGATCCTGTTCGAGAACTCCAAGAATAAGGTTTTCATCCACAGCTACTTCTGCATTAAGAACATT…	677	738.5	-0.108292
PF3D7_1462300	PF3D7_1462300_e1s2	ACGTCAGTAAATCATGATGAAAACTCAGATGCAGATTCATTATTTAATGATCATGATGAGAATATGCAATTAAAAGAACATAACATAAAAGATGGAGAAGATAATACACACCAGAAAAAAGATAGTTATAAATTACCACCATTATTAAATGAAATAAAAAAATATGAAGAATTAATAAGAGAACAAATTTTGAATATATGGTATAAATATACAGAAAGTGATTTTCATGATGAAGAAGAAAAAGAATTAATTAAAGATATTGAAAATAATTTATATGAAAGATTAGATCAAATAAAAATAGAAATGTTAGAATTAGGTGAAATGAATATCAGAAAATTTTGTAAAATCGCATGTGAAGATGCATTACAAATTGTTGTTGAAGATATTAAAATGAAAAGT…	2058	729.5	-0.108785
PF3D7_1130700	PF3D7_1130700_e1o1-s2	GAAATGAAAATACATAAAATACAAATGAATGATAATATAGAACATAATAAACTTAAAGAAAATTATGAATATGAAATTAAATTATATTATCTATTTAAATTATATCATTATTTTAAAAAAAAAGAAAAATTTAAAGAAGATTTACTCCTATATAAAGAAGAAAGCTTACAATTTGAACAAGATATATTAAATCAAAATAAAAAAAAAGCAAATACATTAGAAAAAAATAATCTAATTAAAAAAAAAGAATCTATAAAAATTGAAGAAGATATCAAAAAGAATTATGTACAAATTAATCAATTAAAAATATTATTAAACGAAATATCAGAAAAAAAAAAATTTTGTAACGATTCTTTACAAAAATTGGTTTCTAATAAAAAACTCAAAATCAACATGCAA…	1500	734.5	-0.110345
PF3D7_1302100	PF3D7_1302100_e1s1	ATGAGTAAGGTACAAAAGGATAGTGCCAAGCCCTTGGATAAATTTGGAAATATCTATGATTATCACTATGAGCATGAAACACATGCCCCTCTCTCACCTCGTATTAGAAAAGTTGGGGATATTGAGTTTCATGCCTGTAGCGATTACATTTATTTGTTGATGACCCTTAGCAAGGATCCTGAGAAGTTTAATTACGCTCTCAAGGATAGGGTTAGTATCAGGAGATATGTTCGCAAGAATCAAAATAGATATAACTATTTTCTTATTGAAGAACGTGTCCAAGATAACATTGTCAACAGAATAAGTGATCGTTTAATTTCTTATTGTACTGACAAAGAAGTTACGGAAGACTACATTAAGAAAATTGACGATTACTTATGGGTTGAACAAAGAGTAATA…	651	697	-0.112079
PF3D7_1234400	PF3D7_1234400-S2_C	ATGCTCGAGTCCTTCCCGGCGGACATCACCATCAAGCTTAAGAACTTCGTACACGATAAGTGCCCGGATACCGACCAATTCAACGATTGTTCTAACCTGATCGAGAAAGGTCTTATTAAGCTTAAGAATAAGAATATCAAAGACTTCCCGAAGATCGAGCTTCTGTTCGAGGAAGGCACGGTGATTGTGCATCCGGAAGACTACATCATTCACGAGTCTGACGGCGTGTACCGTGTACTCATCAACAGCAGCGGCGAGCTTAAGCTGGGAATCCCGTTCTTCCTGAACAAGTACTTGATCTTCGACAACGAGAACGAACGCCTTGGCGTCAGCAAGAGTGAGTGCGCCTTAGAGCTGAATGATAACGAGCTCTTCGGGGTGGATCTGAGCAGCAACGAC…	602	730.5	-0.112431
PF3D7_1204000	PF3D7_1204000_C	ATGCTCGAGATGATGCACCGCGACAAGCTGGAGAAAGAGCGTATTATTAAACGCAACGAGAAGCACGTTAAGAACGTGGTGGTTGATAACCTGATTGTTGATAAGCGCTTCAACAATGACGAGGGTAACAAGTATCTTCGCAAGAGCGATGCGGCTTATGAGGACTTCAAGATCCGTGAGAAGCAGAAGCTGAAGGAGTACATTAAGATCGAGAACAAGCGCAAGGAGAATCTGCAGCGTCACGAGAATAAGTGGGCACAGATCGATCTCAATGTCCAAAAGGAAGTAGAGAAGACCAACCGTCTGCAGCAGATGCCGTTTAAGTCCGAGAAGAATAAGAGCAAGTGCTCTCACGACATCATCAATCACCAGTACATTAACTACGAAGAGTCGATGAAG…	572	734	-0.112572
PF3D7_1027700	PF3D7_1027700_C	ATGCTCGAGATGATTAACCGCAAGTCGGAGTCAGTTTCTTACACACCGCGCGCGATCACGAACCGCCCGATTAGCAGCAACCGCCGCCGCGGCCGTAATGAGATCACTGACGAGCAGAAGAACGAGATCAAGGAAGCATTCGACCTGTTCGACACTGAGAAGACCGGCAAGATCGACTACCATGAACTCAAGGTCGCGATCCGTGCACTGGGCTTCGACATCAAGAAGGCCGATGTCTTGGACCTGATGCGCGAGTACGACAAGACTAACTCGGGCCACATCGATTACAACGACTTCTTGGATATTATGACTCAGAAGATCAGCGAACGTGATCCGACTGAGGAGATTATCAAGGCTTTTAAGCTGTTCGACGACGACGACACCGGCAAGATCTCACTG…	620	741.5	-0.113144
PF3D7_1455800	PF3D7_1455800_e1s1	ATGACAAAATTGTTTTTCATTAATTATGCGTTTGTAATAATTTTTTCGTTTAATTTATTTGTTAAGTGTGGAGATGACATAAGTAATACTTTTTTTAAATTTGAATTTTGTGAAGCTACTTCTACTTTTTCAAGTATTGGTGAAAATGGTCTACCACAATATGCTGCTGAAAATGCCTTAACCAGAGGTTCCGGATATTGGTGTTCAGAAGGGAAACATAATGTTAATGATGTCGTTTCTTGGATAGGCCACTTAAAAAATGTACGATCTCTGAATGGGATAATAATACATTGGGCCTATACACCTGGAGAAGTATCCATTTTAGCTAGCTATGATGGTAACGAACCATATGAGGAAGTAGTTCCATATCAACTACTTGAATCTAGAGTTGGA	393	735.5	-0.113197
PF3D7_1345300	PF3D7_1345300	ATGAATAATAAATTAAGTTTTCCTTATGAAACATATGAAATAAAAAAGTTTGCTTTTGAATTACCAAAAGATTATCATCCGAATGTAAAATACGGATTTTTTAGAAACGCCTTATTTGGACAGCATACCTTTTATTATATTAAGAGTATTTTAAAAGTGTCAACAAAAGTGTGTGCTGGATTTTTACTTTTTTATTATCCTCTGGACAAATTGCACTGCAATATTCGTCGATTCAAAAATAATCTTAAGAAATACCCATACGATGTTCCAGATTACGCTTAATGATAGTAGTAATGATAG	300	733.5	-0.113287
PF3D7_1404200	PF3D7_1404200-e1o2	ATGGCGAATAGTTCAGATAATAAGCCCGAAGCAAATGAAACAGTACATGAAAATGCTGCAACCAAAAATGACAAGGAAAATGATAAAACTGAAAATAAAACATCAGAGGTAAATGGAAAAAATAAAACTCATACTATTAATAATAATGTAAATCATTTATCAAGTGAACATGAAAAAAAATACGTACAAGAAACTTACAGTTTTACATTTGACAAAAGCTTATTTGCAGCACCAAAG	237	736	-0.114277
PF3D7_1025500	PF3D7_1025500_e1s1	ATGAACTACAGTTCGTTAAAAAAGAACCTTGTGATTAACTTCGAAAATTTTATGAATCCATATGATTTCAATGAAAAGAAAAAGAGGAAGGAAAAAAGTATTTGTGAGTTAAACACACAAAAAAAAAAAAAAAAAAATGCAGACGATTTAATAGAAGATGTTGTAAAGAAGGAGGATATGTTATATTATACTAAAAGAAAGAAAAGTGGTATGGAAAAAAAGGAATTAAATATATTGTTAGAAATTGATGATATCTTAAAAGAAAATGTAAATGATAAAGAAAAGATTATAACAAATAATATGAAAATAATAAATGATGAAAAAAAAAAAATCGATGAAAAGGGAAAACTTTATGGTAATAAAAATGTAGCTAGCCAAAATAAAGAAATTCATATTAAA…	612	732.5	-0.114621
PF3D7_0509100	PF3D7_0509100_e1o1-s2	ATGAATATATCTTTAAGTAATTTAGAAAAGGAAGAAGAAGAAGTTATGAAAAAAAAGAATTTAAAAAATAATGAATTCAAAAAATTAAATATTGAAGATGAGAATATAAAAAAAGAATTATTAATTATAGTACAGAAAATGCAAAATTTATATGTTAAAAGAGAAGAATTAAAAGAAAAAGATATCCCATCTTTTAAGAGAATTATTGAAGAAAAACAGAAAATTATTAATAAAATAAAAAAAGAAGAATTGCATTTATTAGAAATGGAATTAGAAAAATGTGAAGAAGAATTAGAAAATTATAATGAAGAAATTAAACAAGATATTGATAAAATGAATACTATATATTCTAATGAAGAAAAAAAATTAGCACCTTTACAAAATAGTTATGATAATATT…	1500	732.5	-0.114988
PF3D7_1416000	PF3D7_1416000-e3o4	TATTTAGTAGGGTCATTACTATGGGACGGTGTTATTAAGCCAATTTTTAAAATTCTCTATATGGGAATATCAGTATACTTGATAATAAGATTTAGTGTCCTCTTTTTACCTTACACGAAATCTTATTTTTCTCAAGAAAATTATAGTTACCTATCTTCTTTTATTCTTCATTCTTATAATTTAATAACAAAG	192	742	-0.115096
PF3D7_1133400	PF3D7_1133400	ATGAGAAAATTATACTGCGTATTATTATTGAGCGCCTTTGAGTTTACATATATGATAAACTTTGGAAGAGGACAGAATTATTGGGAACATCCATATCAAAATAGTGATGTGTATCGTCCAATCAACGAACATAGGGAACATCCAAAAGAATACGAATATCCATTACACCAGGAACATACATACCAACAAGAAGATTCAGGAGAAGACGAAAATACATTACAACACGCATATCCAATAGACCACGAAGGTGCCGAACCCGCACCACAAGAACAAAATTTATTTTCAAGCATTGAAATAGTAGAAAGAAGTAATTATATGGGTAATCCATGGACGGAATATATGGCAAAATATGATATTGAAGAAGTTCATGGTTCAGGTATAAGAGTAGATTTAGGAGAA…	1866	740	-0.11576
PF3D7_1346700	PF3D7_1346700_e1s1	ATGATGTTATATATTTCTGCGAAAAAGGCTCAAGTTGCTTTTATCTTATATATAGTATTAGTATTAAGAATAATAAGTGGAAACAATGATTTTTGTAAGCCTAGCTCTTTGAATAGTGAAATATCTGGATTCATAGGATATAAGTGTAATTTTTCAAATGAAGGTGTTCATAATTTAAAGCCAGATATGCGTGAACGTAGGTCTATTTTTTGCACCATCCATTCGTATTTTATATATGATAAGATAAGATTAATAATACCTAAAAAAAGTTCGTCTCCTGAGTTTAAAATATTACCAGAAAAATGTTTTCAAAAAGTATATACTGATTATGAGAATAGAGTTGAAACTGATATATCGGAATTAGGTTTAATTGAATATGAAATAGAAGAAAATGATACA…	1344	734	-0.116745
PF3D7_0206800	PF3D7_0206800	ATGAAGGTAATTAAAACATTGTCTATTATAAATTTCTTTATTTTTGTTACCTTTAATATTAAAAATGAAAGTAAATATAGCAACACATTCATAAACAATGCTTATAATATGAGTATAAGGAGAAGTATGGCAGAAAGTAAGCCTTCTACTGGTGCTGGTGGTAGTGCTGGTGGTAGTGCTGGTGGTAGTGCTGGTGGTAGTGCTGGTGGTAGTGCTGGTGGTAGTGCTGGTTCTGGTGATGGTAATGGTGCAGATGCTGAGGGAAGTTCAAGTACTCCCGCTACTACCACAACTACCAAAACTACCACAACTACCACAACTACTAATGATGCAGAAGCATCTACCAGTACCTCTTCAGAAAATCCAAATCATAAAAATGCCGAAACAAATCCAAAAGGT…	816	740	-0.117398
PF3D7_1020600	PF3D7_1020600_e3o3-s4	AATAAAAATAATTTTTCTGTATATATACCGTTATCTCCAACTTTTGATTTTCTAAAATATTTTAAGGAAATAAATAAATGTAAACAGAATCATTATGATAATGGGAGGGATACACATAAGTTGAACATGATAGAACATATGAATCAAGAAAAAAAGGAGGAAGGTGGACAGATGATAGGAACGACATATTTATCTTCAAATTGTCGACATAAATCGTTTTTTTCATCACCATGTGAATCGTGTAAATTGTGTGAATCGTGTGAATCGTATAAATTGTGTAAATTGTGTACATCATGTTATTATAATTTCTTCAATTTTAATGAAAGGAAAGAAGAAATACATAATCACTTACACACATCAAATACATTCCTAAAAAGAGAAGAAACAAAATACATTTGC…	1500	731	-0.11748
PF3D7_0609500	PF3D7_0609500-S1_C	ATGCTCGAGATGCGCTTGTTCTTCTTGTTCTCGATGTTTCTTATTAAGTGCGCGACGTCCATCTACGACGACAACTTCATCTTCACCTTCAAGAATGCCAAGAAGATCAACACCATTAAGAACGACGTCAAGAAGTATGAGATTGAATTGAATCTGACGTTTAACATTAAGAAGAGCGGTAAAGAGTTCTTCCTGGTCAGCCTGATTCCGGCCCGTAATCTGCAGATTCTGCAATTCAAGAAAGAGGAGACAAACGAGATCAACGAGAATGTCCAGGTAATCCTGAATACCACGCAGATGAAGGACAAGGATTCGTGCGACTACGTGATTACCGCGAAGATGTATTTGCTGAAGCTCACAAAGGACGAGCTTAAGAAGTTTAAGATTTATCACTACCCG…	1583	740	-0.117596
PF3D7_0910300	PF3D7_0910300	ATGATTTTTCTGCGAAATGGCTTTTTTTTTCTTTTTTCTGTTTTAACTTCTTGTTATATTAATTTGTTTACGCAATGCTTAGGTGAGGAGTTTGAGAAGATAAAATATCCCCAGGATGTAACAAAAATAAAATATTATGATAACTCACATAAAATAGATAGTAAATATTTATATAAACATGTCGCGAAGGGTATGTTACAAGATTTAATTGTGACAGTTCAAATTGATAAAGATAGAGAAGTTGACAAGATATTATTTTTACCAAAAAAAAAAACATATATGAAAATAATTGGTGACTGGTCAGATTATCCAAAAGAGAAAAATAATGAAATATGTTTAGCTTTTGTATTACAAAAATATTTCAAAAAAGAAAAAGAAAAAAAATGTACAAAAGATTTT…	1296	731	-0.117648
PF3D7_1330400	PF3D7_1330400_C	ATGCTCGAGATGAAAGGTGTGAACGATTTCTTCCGCAAGGTTAATGACGCCGAGAAGATGAAACGTTATTTGAGCGATCACTCAAGCTCCATTAAGATTTACTGCTTCTTCCTCTTGTTGGTCTTCATTTTCTACCACCTGTTCTCGGACGGTGACTTCAGCTTCCTGTTGACGCTGAGTTCGGTGATCAGCATGTTCAGCTTCCTGATGGTTTTCCTGAAGATCGAGATGAATAAATCGTGCGCGGGAGTATCGCTCAAGATGATGGAATGCTACGTGGTGCTTAACACGTCGCGTTTGATTTCTATTGTGCCCTTCGAGGGGTACTTACCCTATGACAAGAGCGGCGACTGGCTTTACCAGCTTGTAGAGGCGGTATCTCTTTTCATCAACTGCTGC…	935	733.5	-0.117996
PF3D7_0501200	PF3D7_0501200_e2	AGGTCATATCCCAAATCTGGCCATAAGGGACATACGAAATTAAATCAACCAGTAGTTAGAACATTAGCAGATTTTAATGACATGTTTGCAAACCAAAAAAATACATTTAATTTTCTAAAACATATAAATCATTATAAAAATGAACAAGATACAAATAATACACACACGCCAAATCATGATGAATATTCTCATAATTTGCCAAAAAATCACGAAGAGTCAAATGCAAATATGAACAATCATAATTCTTTCAATGACAAATCTGTTAATAAAAAAGAAGCTTTCGATCAATTTTTACAAACGTTATTAAACAATTATGAAATAATGCATAAAGAAGATGAAAGTAAAGAATCAAATCAACATAACTATAAAGAAGGTCCCTCATATGAAGATAAAAAAAAT…	1155	731	-0.118843
PF3D7_1477700	PF3D7_1477700-e2o2	ATGGTTATTCACATAATGAATTCAAGGGTAGTTCCTAGAGCAGTGTGGCCAAATCAGAGTTTACATCATGTATTACCCAGTGTTAGAATTACGAGTGCTAAAAGAAGAAGAATGAACTACAATGATGATGATGCTTATGATGAGTCTCATTATAATCATAATAGTACTAACAATGGGAATTCTGATAAAGCTGAAGATATATGGAATGGTATAGATTCCATATTTAATAGGATTATGCAAAACATAAAAGATAACTCGTATAAAGATTATCCTTCATTGCATAGAGTTGTTGATTATAATGACCTTTCAAGAAATTTAAGTAGAGAGGAATTAAATGCTGTTCTTAGAGGTTTAAACGACGATACCCCACGAAATGACCTTATCAGTATATGGAATCAT…	786	730	-0.119237
PF3D7_0522400	PF3D7_0522400_e3s2	TTAAGTATGGGTAGTGCCAGAAAAAAAATTGTTCAAGTATGTATTGAACAATTAAAAACTTATTTTATACATTCGTCTTATCTGTATAAAGAACTCGTTAATATTAAATCATATTTAAATAAAATAAAAAAAAAAAAATTAGTCGGAACTATGTATAGTAGGGAAATTTTCATTGAGCATTCTATACTTATGGATCCTTTTAAGTCCAAAATGGATGAAAAGGAAAAGGTACAAGATAAACAAAAAACAAGAAAAAATTTTGGAAATAAAAAGTTAAAGGATTCTATACAAAATAAGAATTTTTATAGATCACCTAACATTAACAATATGAAAGAGGTAAAAAATCATAATGTTAATATTGAGAAAAATATTAAAAAAGGAAGACATACAAATGATAAC…	2802	732	-0.119572
PF3D7_0413500	PF3D7_0413500	ATGTATGTAAATTTTTTTAATAAATTAAATATCCCCAAATGTTTAAGAACAAATTTTAACTTTAAAAGAAGATTTAGTGAAACGAAACAAAATATTCAAATAAAATATATTAAAGAAAATAAAAAGAAATATGTATTTTATACAGCCGTTACATCATTATCCTTATCAATAGCGTTGACTTATGCATATGAGAAATTCGTACTTTATAAATGGAATCGTAGATATGATTATTATTATAATCCAAATATAAAATTTTTTGAAAAGAAAGAAAAAAAAGAAGGTAAAAAAGATAAAAAGAATACAACGAAACATATTATATTAGTTAGACATGGACAATATGAAAGAAGATATAAAGATGATGAGAATTCTAAACGTTTAACTAAAGAAGGGTGTAAACAA…	885	730	-0.119857
PF3D7_0831400	PF3D7_0831400-e2o2	CCACTCCATAAATATGTTGAAATAAAAGAAGGAATAAATAATTTATCTATTCATGCACATTTAAGGCTATTAACAGAAATAATGGAAAATTGTTCTTTAAATGGATTCAGATTAAATGACAAAAATGGAGAACATGATGAAGAAGAAGAACGTAAATGTGATGATGATCAACATAGTGAAAACCAAGAACATGAATGTGATAATGATCAACATAGTGAAAACCAAGAACATGAATGTGATAATGAACAAAATGATGAATCTAAATGTGAAGAGTCAAATAATACTGATCAAGCTGATGTCAATTATCTATCGATGCCTATACAAATACCTTACTTAAGAAATGAAATTATGGATGATAATTATTATAGTCGTTATTTTGATAGTAATATTATGAGAACA…	831	733	-0.120582
PF3D7_1437800	PF3D7_1437800	ATGGATAAATCAAAAAGTTCCATAGAGAAAGAATTAAATAGGATAAAACAGGATGTGAGCTTAAGCGCATTTAGTATCCTCTTTAGTGAAATGGTACAATATTGTTTATATAAAAGTAAAAGAGGATATCGAATAGAAGATTGTTTACATGAAATGGGTTTACGTGTAGGTTATAAATTAAATGAATATTTAACATATAAGAATAAAGTGAAAAGAAGCATAAATATTATTAATATTTTAACATTCATATCTAAACATGTGTGGAAATATTTATTTCAGCATTCATCTGATTTACTTAAATCTCAAGATAGTATTTATGAGTATATGATATGTGATAAAAATATTTTATTAAATAAATTTATAAATGTACCAAAAGATTATGGAAATATAAATTGTGCT…	552	741.5	-0.120746
PF3D7_1037800	PF3D7_1037800-S2_C	ATGCTCGAGCCTCTGTACGCACTGATTAGCCCTTACCAGATTAGCTCTGCGATCGTGAACGAGAACGACTATAACCTGGTGATTGCCGGCTGCTCCAACGGTTTATTGGTTATCTGGAAACTGCCGCCTAACTTCAACGGCATCTCCGTGCTGAACTCTAAGATCAACGAAAAGACGGTTAATATTGAGCCCTACCTGTTCTCTAGCATTGAGCACTCCCACAAGCGCGAGGTTACGTCTCTGATCTTCCTGAACGACAAGAGCCTGATTCTGAACGAGAAGAAGATCTCCATCAGCAACCAGAAGAACTGCCACCTGCTGGTATCAATTAGTGTGGACGGCAGCATCCTGATTTGGGATGCCACGAACATCGAGATCGCGGAGACGAAGATCAACATG…	1466	737	-0.121956
PF3D7_1141900	PF3D7_1141900	ATGTCTCATTATAATCCAGAACAACTAAATTTTGTTAATAACCATAGGAATAATGTTAAGGAAGGATATTTTTATAAAAATAATTTATTAAAAGAAAATAATAATAAAATGGAAAGTTCTAAAAATTGTATTATGGTGCCTTTAATAAATAACCCTTCTCATAGTGAAAATAATTTTTCAAAGAATAATAGAGATGAAAATATAAATGAAGAAAAATCAAAATACCAATTTGAATATCAAAATAAAATAATACAAGTTCCCGAATTAAAATATGTAGACAAAATGGTATATGATCCAGTAATTATAGAAAAGGTAAAATATGTTCCTAAAGAGGTTATAAAATATAATATCATAAAGAAACCTGTAATAAAAAACATAATAACTGAAAAAAAAGTGGAT…	1512	741.5	-0.122036
PF3D7_0826100	PF3D7_0826100_s2	CCGAATTTTTATTTCACAGTTAAAGATGAAGAAGAGTTATATAAAATATTATTATCACGTTTTCAATATGAATTTTTTTTGATGTCTGATAGTTTTTATCATTTGAACAGAAAAGATTATTTAAGATATTATTTCGAACCTTTTAATTATGAAGGTTATGATCAAGAATTTATAGAAACGAATGAGCAAAAGGAGATATATATAAAAAGGAAGCGAGAAGAATATTTTAATTATGTAAATCGTATACAAGATTTATGTAATATGAAAAATATGAATAACAGTGATAATATTAGGAATGCTTGTGTTAATATATTTGGTGGTATAGGCCCTAATATATATAATGGGATAAATAATTTAACAGATGTTTGTATAAAAAATGTCATATATAATAATGATAAT…	2913	730	-0.12227
PF3D7_1447800	PF3D7_1447800_e1s1	ATGGCTGATGAAACCAAAATAGGGAAAGAAGAATTAAGGGTGTGGATAGAGGATACATTGAAAAGAAAAGATTTTTCCTTTAATTGTTTGAAAGACGGTGATATATATTTACAACTGTTTGAATATATATGGCCAAAAGTGATGAAAAAATATAAAGGACGTATTATAATGTATCCATCAAGTGATAATGAAAGAAAAGAAAATTGGAAAGTAATAAATATTGTATTGAAGAAGGTACAACTTGAAGAAGATTTTATTAAGTATAATGATATTGTTAAAAATAATTTTAAACCATGTTATGAATCATTAATTATTTTATATTTTTTATATTCTTTAGTGAGATATCATGAATGTGATTTTATATTAGCACATCCGATTGATCAAAAATTAACTGATTTT…	3009	739	-0.123108
PF3D7_1339400	PF3D7_1339400-e1o2	ATGGGCAAAATTGATCATATAGCGAAAAACACGCTTAACGAAATTGTAAAGAATGGAAATCATAATATGTCTAGTTTTTATGATAAAAAATTAATATATATTAGTAAACCTACACATGGAAATTTTGTTTATTGGAAAATAAGAAATTTCATATCTTTATTTAAAAAGAAAACAAAACGTTGTGCTAGATATTTAGATTTAAATCATGACTTTTCAAGAGCTGCTTTAGTTGGTGTACCCAAAACAAATTTCGATCCAAAAAATAATATTTTTTATATACAAATGGATAATGAAGAGTGGGCA	303	724.5	-0.123881
PF3D7_0104500	PF3D7_0104500	ATGTGTTGCATAGAACATATAGATAGAAGTAAGAATATTATATTTTTTGGTATTATAAATAAATGTTTATTTTTAAATAATAAAAGAGTATTTTTTTTAAATAAAAGGAGAAATATAATAACTTATAAGAAAGATATAAGATTAGAAACTTTAAAGATGGATGATTTTTGTGAGGTTGATTTAGATGAGTTTTGTTATAAGCAGTTTGATGAAAAGAACAAATCATGTTCGTATATACCGTATGATAAGGAAAAATTTGTTATAAAAGTAAATGAATTAATAAAAGAAAGAAAAATAAAAGTATTACCTGGATATGCAGATTTCTGTAAACATATATTTATAGAGAACTTTACAGAAGCAACAGTCGAAACAATGGAAATAAATAATAAAAATAGGGAT…	765	728	-0.124885
PF3D7_0111500	PF3D7_0111500_e1s1	ATGAATTACCAAAAGTTATTTTTAATATTTTTTTTTATGTTCATAGTAAAAAATCCATATTTGTTTGTCGAAAATTTCTACCTTTTAAAAAATAGCAAGCATTTTCCTTTTTACATAAATAGAACTAATGGTTCTTATAAAAAGGAACAACCTTTTAAAATTGAAAGCCAACATTATAATAAAATAACAAGAAAATTTTATAAATTTAAGAAAAATATATACACATCTACATCAAACTTTTCTATAAACAGTTATAATATTTGGGAAAAACAATTTTTTTCAAATAATAAATTTATCATGAGTAAAGATCAACCCTTTGTG	321	727	-0.125167
PF3D7_1451900	PF3D7_1451900_e1s2	GATTTTATTTGCTCATATGACAAATATGGTGGAATGAACGACGACAACAGCAGCAACAACAATAATAATAATAATAATATGTTTAATAATAATAATAATAACATTATTAATAATTTTAACATAAGTAATGAAACGCAAAATAAAAAATTTTCAACGAACCATCTTGAGTATGGAAATAATGATTTATACAAAAATTATGATGAGGATGAAGAAAATAATGATGATATATCTGATGATATAACTGATAATATAACCGTAAATGAGACGGATAATAAAAGCGAAGATTATAATGATGATAGCTGTATTGAAAAAGATTCGAATAATTCTGATAATATATATATATGTAAAAATATTAGTGCAAGAGAACGTTTTAAAAAATATCGAAGTTTACAAAGTTTT…	1566	729.5	-0.125598
PF3D7_0418000	PF3D7_0418000-S8_C	ATGCTCGAGATAAACGAGGAGATGAACGGCGTTTTCGAGTACAATTTCTACCTGCTTAAAGGCAAGCAGTATAACGTTGAGAACTGCCTTTTCATGATTAAGGACGGCGGCGAGAACTACGTGAATGATCAGGTCTCTCTGTACATTAACGGTAATAAGAACGTCAACAACATGTTCAGTCCGCCGAAGAACAACAACGTGAACTCAATGAACAACAACAACGACGACGACAACGACGATAACAACGACGATAACAACGACGACAACAACAATAACAACCACAACAACAACAACCATAACAACAATAACCACAACAACAACCACAACAACAACAACAACAACCACAACAACAACTACTACTACTACAACTCGTGCGACGGCGACGAGTTAGTGCCACTC…	1583	680.5	-0.125622
PF3D7_1328000	PF3D7_1328000_e1o1-s1	ATGATTGTTTTAACAGAAAATCCATTAGAAAAAACTAATAATTGTACGTATTCAAGCAACAAAGTATTAATTAAAAGAAAAAGTAATACCCAATTAAAAGTCATAGCGAATAGAATTACACCATATTTTAAAGGAATAATAAGGACGCGAAGATTTTTAAAACTTGTTGATAAGACAGGACACAAATATTTATACTCAAAAAATAATATAAATAATAATATCGAAAAAGAAAAGAAAATTAAAAACCGTTCAGATGATATAAAAAAAAAGAATTTAAATAAATTAGATAAGATTTTTAAAATTAAACAGAATAAGCAAAATAAAGTTATAACTAATCGAGTTCATTTTTATAATAGTACCTTAAAAGATTCATATATTACAAATTTGCAACATCAAGAA…	1500	728	-0.125747
PF3D7_1128300	PF3D7_1128300_e3s1	AGATTTCAGAAAATATTAAAAAAAGAAAGTGTCGATCTACTTAATTTATTAACAGAGTCCATGAAAGATAAATTATTGAGAAAAGAAAAAAGAGAAAACGAAGATATCGATTCTAATTTTGAAGTAATGTTAATAAATGAAATAAAAAAATATATACAAAATTTGATGGAAAAATCCAAACAAAATAAAGAATTATATTGCTACAAAAAGCATATGAATACAATATCAAGTCCAATAAATGTAAAGAACATCAAGGTTTATAGTGATATAGATTATATATTACATTTTCAAACATTAATTAAAGTAATCGACAGAGAAATAAACTGTTTTTTTCCTACACACTTTGATAACTCCTTGGCCTTCTCTCATGGACTCCTGGCAGGAATAGCTGTAGAAAAT…	522	727	-0.125842
PF3D7_1127600	PF3D7_1127600_C	ATGCTCGAGATGAATGATAACCCGGTCTCTAGCTACCTGTCCAAAGACGTCCTGGACTACGAGCCTACGAAAGAAGAGATCAAGTTCTACCACAAGAACAATCTTAAGTCCCTGCGCTACATCTTCTGCGGGAAGGAATTAGACGATTTCGAAAAGCAAAAGATTCGCGAGCTCAAGGAGTTCGTCAACAAGCTGAAGCTGAAAGAGAAGGACAAGGAAAAGGACAAGGAGAAAGAGGTCGAGACCTATCAGACCATCTTCAAGAACACGCTCTTCGACGACGACAACTACGTCCTGCGTTTCCTGCAAGGCAACGAGTTCGTGTTCGAGCGTTGCTACAATGACATGCTGCGTCATTTGACTTGGCGCAAGGAGAACCTTCCTATTCCGCTCTCGGAT…	974	724.5	-0.126679
PF3D7_0806800	PF3D7_0806800_e1s1	ATGGGTATATTTCGATCGGAGATTATGAAACACGGGACATTAGTGCTGCCTTCTGATAGGGCAAGGGAATATTTGGATTGCTTAGGAAAAGAAGTGGATATACAATTCATAGATATGAATGAGAAAACAATGAAAAGACAATACAAAAAATATATTCAGCGTATTGATGATATGGAAAGGATATTACGTTTTTTAGAAGAGAATATTAATAAATTACCAAATGTAAAAATAAAAAAGAGTAAAATAGATAATTTTTTAGAACATGATAATATATATGAACTTGATCAAGTGGAAGAATCTTTAAATCGATTGCATGTTCAATTCGTACGTTTTTGTAATAATAATAAAGATCTTATAGATGAAAAAAATAATGCTATAGAAGAGAAACATGTTATATTA…	1611	727	-0.127281
PF3D7_1021400	PF3D7_1021400-S1_C	ATGCTCGAGATGATCATCGAGCACGTCCTGTGTAGCTTTATCCTGTTTGTTTGCTACATCATCAAATACGCCGACGCCTACCTGCCCGGCATGAACCCCACTACATACAAGGAAGGTGACCCGGTGATCATCAACATTAAGAACCTGAGCAGCCGTCGTGCGGTCACTACGCTTGACTACTTCAGCTTCCCGTTCTGCAGCAGCAACAACAGCAAGTCGAGCGGGGAGAAGGCCCCTAACATCTTCAAAATCTTGCTCGGCGACACGCTGCACGACACCAATATCGAGACTACCTTCTTGAATGACAAGAAGTGCGCGTTCTACTGCAAGATCTTCATCGATAACAACGTGTACGAAAAGTACAAACACCTGATTCTTTATAACTACAACATCGTCTAC…	1583	738.5	-0.127738
PF3D7_0212400	PF3D7_0212400_e2o3-s3	GATTTTTTTATATCTAATGGGAAAAAAAATAAAGAAAATGTTGTATTTCATACATTACATAATATGTCCCATAAAGAAATGTCTAAATATGATTTGATAGGAAAGAATAAGTATTTAGAAAATTATATAAACAACTTAATATTAGAAAAGAAAAAGAAAATAAATAATTTGAATGTACATATTAATAAGAAAATGGATAATAATATATTATATTCATTTATAAATAGAATAAATGAAACACGTGATAATACAAAAAAGAAGAACAAATTATATATTAGACGTTATTATTTAAAAAAATCCATAAAATATAATAATCATTTATATAATATGCCTATCTTTTTATCCTTATTTCTTAGATGTGTTACTATACATTTACATTATTTTAAATTTTATAATAGT…	1500	734.5	-0.128337
PF3D7_0316700	PF3D7_0316700-e2o2	TATCAATCCTTCAAAGCTGTCGAATCTCAAAGCAGAGATGAAACTAAATTATGGTTAACTTATTGGGTGGTTTTTTCTTTGTTTTTTTTTATCGAATATTTAATTGACATAATATTATTTTGGGTACCTTTTTATTACCTAATAAAATTGCTTTTCCTTTTATATTTGTATATGCCCCAGGTACGTGGAGCAGTAATGGTATACAACTATATAATTCGTCCCATTTTATTGAAACATGAAAAAATGATAGATGACACTGTTCAGAAAATTAGCCAAACGGCAACTAGCCATTTAACTCAAATCACAGGAAATTTAACGGAGAAGTTGGTACAGGAAGGAATAAGAAGAAGACACATA	357	733.5	-0.128961
PF3D7_0816900	PF3D7_0816900	ATGGGATCATGTTATAGTAGAAAAAATAAAGTATCAACAATATCATTAGATGAAGAGGAAAAAAAAAAAGAAAAAAAGAAGAAAAAAAAAATATATATTTTAAATGGAGCATCTGGGTCAGGAAAAGATACACAATGTAGATTATTAGAAAAAAAATACAATTATAAAATAATTTGTATAAGTAAATTATTAAAAGAATATAAAGAAGAATATAATAAAGAAAATGTATTAAATGAAGAAGAAAATTATTTTGATGAAATAGAAAAATGTATGATAGATGGATCTTTAGTTAATGATCAAATTGTTATAGAGATATTTCATAAACAATTGAACAAATATATAAATGATGATAAATATAATGGTATTATAATAAATGGTTTTCCTAGAAATTATGAACAA…	825	725	-0.129595
PF3D7_0726400	PF3D7_0726400_e6s2	TATTACTTTACTTGTAATTATTCCGTGATAAAATCTAATAAAGAAAATATCTTATTACATAATAGTAGTGTACATAAAAAACACAAAGACAAGAATGTTAAAGATATAAAAAAGGAAACAAATGATATTACTATTTTTACATCAGCAGATATTAATTCATTTATTAAAACATTGTTAATTATAATAAATTATGACATTCATAAATTTAAGGATACAGAATATCATAAAACAATTGAACAAGTTATTAAAGATAATGATTGGTATGTTATATATAATAATAATAATAACAATAATAATAATAATAATAATAATAATAATAACACCTCGTCCCTTTTAACCTCCTCCTCCTCATCATCATATTATTATAATAAGGATGAAACTAGAAATATGAGCTTTCTA…	2289	719.5	-0.12985
PF3D7_0621100	PF3D7_0621100_e1o1-s2	ATCTATGATCACAAAAAAAAAAATCATACAATGAGTAATGCTTATAATAATAATAATGATTGTAAGAATAAAATTTTTAGATATTCCAAGAGAAGACTATTTCATGAGAATGTTTATAAAAAAATTAAAAAGATCAATCTGAAAAACTTAAACAATATGACCATAAAATTTGGAGGAACCATTTCTTCCTTTTATGATAATATTGAACAATTTCCACCTGATGTTTTAATAAACTGGCAAAAATCAGTTATTCATAATATTAATCATAATCCAGCTAATGTAAATATAAAAGAACTTATATCATTATTAAGATATTCTAATTATGATTCAGATGTTTTTTTTAATATTAGAAATTCCTTTATAAATTTAGTTACATATCCAAATATAAATGGTAGAACA…	1500	734.5	-0.130169
PF3D7_1025500	PF3D7_1025500_e4s1	AATTTTTATGAAGAAGTTGTAAACGAGTGTAATAATTTCATTAGTTTTCTCTTGGAAGTATTCGAGAATATATTCCGAAGCCCCCCAAAGGATATGAACGATGACAGCCATGATAATCATAATAATCATAATAATAATAGTGTGTACTATTTACACATGAACAAACTTAATAATGTTATAAATTATATGTTATTATACGACAAAGAATGTTGTGCTAATTTCAACGATATATTAAATTTATTTAGAAACGATGTAGAACGTATTTTTTGTGAATCCACCTCCTTGAGCTATAAAAAAAAAGTTGAATATAAAGAAATTATTAACGACATTTTTTTAAAATATTTTGACAAGCATATAACGTACAAGACAAATGATTTGTTTATAAATATTTATAATAAC…	2631	724.5	-0.130318
PF3D7_1036800	PF3D7_1036800-S1_C	ATGCTCGAGATGTTTAACCGCCTGTTCGAGAACTTCGAGTACAACTTCTTTATTAAGCGCAAGAAATTGAAGTACGACACCAAGGACGGGCAGTACGTAAAGCAGAACATTTCTAAGCGCAACAAAGATTACTACAACATTATCTTTCTGCTGTCGTTGTACACGATCCAGGGAGTGCCGATCGGCGTAAGCTCAGTGGTCCCGTTAATTATTCAGGACAAGGTTTCCTACTCGCAGTTAAGCATTCTTAGTTTGGTCTCAATTCCCTTCTCAATTAAGCTGCTGTGGGCGCCGATTGTCGACTCCGTCTACAACAAGCGTATCGGCCGCCGTAAGTCGTGGATCATTCCTTTACAACTCTTCTGTTCCTTCACCATGATTTACTTCAGCAACCACGTT…	1583	732.5	-0.130349
PF3D7_1306600	PF3D7_1306600-e3o3	AATTTTGAAAGATATTGCCACGAATTATCCAACGGAAAATTGAAGTGGTCCGTTTTACATACAGAAAAATTTTGGCTAGAAAATGTCATGCAATTTGAAAAGGATGAATTTAAGGCAATTCAGCAATTAGCTGATATAATAAAATTATATGCTCATAATATTATTCAGAAAAGTGAAACCGGTGAAAGTAAAGAAGAAATAGACGCAGTAACAGTTGCCGTTGCTTGTTTTGATATTGGTGAATTTGCTAGATTATATCCTAATGGTAAGAAAATATGTCAGAAATTTAAAATAAAAGAAAATATTATGATTTTAATAGCTACAAAGGATAGAGATATTGTCAGAGAAGCTTTATTATGTGCGCAAAAAATTATGTTGAATAATTGGCAGAGTATATCT…	408	732	-0.13135
PF3D7_0304200	PF3D7_0304200_e1s1	ATGTCATTATATATGGTTGAAAGGATGAGGAAGCTTTTGTACAGAACTGAGGAGGAGACAGTGGTATATGACAATGTGCTGGAAGGTCTGTATTCATTATATAAAACATATATATTAGATTTAGAAAAGGAGTTTATGTATTATCATTTTTATAAACCATTATTAACAAGTGGTGATTTTTTATCAAAACCTATGATATTATTGTTAGGTCAATATTCCACAGGTAAGACAACATTTATTAAACATTTAATTGAAAAAGAATATTGTGGTATGAGAATAGGTCCTGAACCTACTACTGATAAATTTGTAGCTGTTATGTATAATGAGAAAGAACAATTAATACCAGGTAATGCTTTAGTAAGTGATATTACGAAACCATTTTCACAACTAGAAAGTTTT…	1599	724	-0.131587
PF3D7_0212400	PF3D7_0212400_e1o3-s2	AACAAGGAACTTCAAAATGAAGAATATAATTTAGATGTTTCAAATTTAAATAACATGTTTGAAGATGAGGATAGATACAAAACGAATCAAGATGTAAATATAAATATAAATATTTCTCTTGTTAAAAATATGAAAAAACATATTGAACAGAAAGAATTTTTTAAAAGGAATATTAATAAGAATCTTTTTTTAAATGTATGTATATTACTTTTTAAAAAACAGAATTTTCTTTTATATACTCATGATATAAAAAAAGAATATAAGAATATAAATACATGTCTTGAATATTTACAAAACGATAATTACCAATATGACATATATTCTTTGAAATATTTTTTACATAATTATGATTATAAAGAAACAGAAATTATTACCAATTTTAAAGAAAAGGAAAAAAGT…	1500	734	-0.132805
PF3D7_1102600	PF3D7_1102600-e1o2	ATGGAGAAGTTTAGTAATTTACATGTTGGTACAATATTTTACAGAAATGTAAAATGTATATTGGAATTATTTGGTATTCTTTTACATTGTTTAAATTTGAAAAAGAACTGTAAAGAAAATATGAAAATATCAAATAAGAAATATTTTATTTTCAAGAGTTTTGCTGTATTTTTATTTATATGGTTTTTGAATAATCTTAAAGAG	204	732.5	-0.132945
PF3D7_0831300	PF3D7_0831300-e2o2	TTATCTGTGTATGATGAAACTGAACAATCAGGAGTAAAATATTTAAATATTTGTTCAAGAAAATTATCTGAAACAGAAAAAGATCACATCCCATCATTAAGATGTCATGAATTAAAGTATAAATCGAAAGATGAAATAAATGAAGAAAGTTGTATTAATCGTGAGGATTTTAAAGAGTTTGATATTAAGGATGAAAATGAAGAAGTTAAAATGGATGAATATGAAAACGATGAGGAAGAAACATATGAAGAAGAAGAAGAATATATTGATGAGAAAAATGAAAATTATGAAAATAAAGAGGATATTAGTGATAGGGAAGATTTAAGTGATATGGAAAATAATAATGATAAGGATGATTTAAGTGATATGGAAAATAATAATGATAAGGATGATTTAAGT…	2376	733.5	-0.133375
PF3D7_1011500	PF3D7_1011500	ATGGGTTGGTTTGGAAAGATGGAAAAATGTTGCTGCTTTCCTTTAGCAGGAGGATGTCTTGGAGGAGCCATGTTTCATTTCATGATTTGTATTACATCAATTTTTTCAACCACAAAAGATTATAAAAATATGACTATAGCTTCTAATGCAATATTAGGATGTTTAATAGTTCTTGGATTAGTACTTAAGAATTTTATTGTGTTATATATTGTTGCATTGTTTGTAGCCTTTCTTTTAGGTATATATATTATAATTTTTGTATTTCTAGTTATTGCCTTATTTGCAGCAAATAACATGCCGTTTCAACATAAATTATTAACAGCACTTACTGTGTTAATTATAGTACTTATAACAGCTTCGTTTCTTAACATTTATATTTCTACATGTCGAGTTATAAAA…	525	731	-0.133919
PF3D7_1023100	PF3D7_1023100_e1s3	GAGGAAAGTAAAATGTTTTTTAATATCGAAAATGAATATAAAGAAATCATACATAGTGCAGCAGAACAAAAAAATGTTTTACAAGTATGTCTTAATGAAGATTTATTCTATTTATTAAGCAAATTTTTTAAAAATATTGAATTGTGTGAAAAAGCTTTAAATGATTATTTAGATCAAAAGAAAAAAGCTTTCCCACGTTTTTACTTCTTATCTAATATTGCTTTGTTGGATATATTAAGTAATGGAAAAAACCCTTTCAAAATACTCCCTTATATAAATGATGTATTTAATGCTATAAAAACCATACAATTTAAGGAGGACCTTGTTCAGAGGGGGCCTGTGTCGGAACTAAATGAACAAAATGAAGAGAATGATTTGGTAAAGAATGAGGAAAGAAGT…	2892	732	-0.134774
PF3D7_0202400	PF3D7_0202400_e1s1	ATGTTAAAGAAATATATTATATTAATATATATCGGTGTAATTCTAAATTTCATAACTAAAAATAATAATGTAGTGTCTGTTCCTGAGCCCTTTTTATCACAAAACAAAGATTCTTTTGAAGAAAAAAAATATACGTATGGGGATAATTTACAATTGGGGGCATCAACTATAAATACCCCTAAAACACAATCACAAGAAAATAAAGATATAAATAAAGAAACAAAAAATACAATAATAAAAAAAACGAATAATTTTCCAAGTACCTTAAATGAGAAATTTCCTCATAAAATTCAATTAACCAATAAAGAAAATAAAGAAGATGAACAAAATAAAGAAAATAAAAAAGATGAACAAAATAAAGAAGATGAACAAAATAAACAAAATAAAGAAGATGAACAA…	1818	733	-0.13496
PF3D7_1358400	PF3D7_1358400-e3o3	TGGGTAATAATAGCTATTATTTTGTATTTGATATTTATGCTATTCTCATATGTGTTCGTCAACTACGTTTTGTTCTACGCAGTCATATTTTTTGTTTGTGTTCTTATTATTAAATATTTTGTCTATCATTTTAATAATAATGAAATTGAAGTTTTAGAGAATTATCAAAGTTTTGAAGACAACACAATA	189	722.5	-0.136106
PF3D7_0309600	PF3D7_0309600_e1s1	ATGGCTATGAAATACGTTGCTGCATATCTTATGTGTGTATTGGGAGGAAATGAAAACCCAAGCACAAAAGAAGTTAAGAATGTGTTAGGAGCCGTAAATGCTGATGTAGAAGATGAAGTTTTAAACAATTTTATTGATTCATTAAAAGGAAAGAGTTGCCATGAATTAATTACTGATGGATTAAAAAAATTACAAAATATTGGAGGTGGTGTAGCTGCCGCACCAGCTGGTGCCGCTGCAGTAGAAACTGCTGAAGCTAAGAAAGAAGATAAGAAAGAAGAAAAGAAAGAAGAAGAAGAGGAAGAAGAAGACGACTTAGGATTTTCCTTATTTGGT	336	729.5	-0.13627
PF3D7_1325200	PF3D7_1325200_e2s1	GATTTACCAAAAGGAAGAGCGTTAGATATATTACACACAAGACCATTAAATAGATCCAGGATAAATATATTAGGAACAAATGAAATAACCGATATTAAAGATTCCTTAGTTGTAGTAGTAACAATAGAAGTATCTGAGAGAGAATTTGCAGAATTTGATGAAGAGGATTTAGAAAAACAAGTATATACATCCAATGTGAAATTGTTGAAAGAAGTTGCAAAGTCATTAAAAAAACATTGTCCCCAAGCATTTGTAGTAGTAACAACAAGTCCTGTTGATTGTATGGCTAAAGTTTTACAAGAACATGCAAATATACCTCCTCACAAAATTTGTGGAATGGCGGGTGTTCTTCATAGTGCTAGATTGAGACATAATTTGGCTGAGAAGTTGAGA	393	681	-0.13706
PF3D7_0819500	PF3D7_0819500_C	ATGCTCGAGATGTACGTCTTATTCAACGACCACCTCAAAGAAGAAGGAGAGCAGAACGTGAAACTGCAGATCTGCAACGGTAAGAACAACTCGTCGAGCGAGAACGAGAACACGCTGTCTTCCAAGTATTTCCGTAAAGAGAACCGCCGCTTCAAGCAAAATATTAACATTCTGGACAAGCACATTATCCTGGCGGACAATTTCGGTGACGTCCCTGAGGAAAACTTCGAGTTGCCGGACAACAAGCAGAACGAACTGGAGATTCTGCGCAAGCGTAAGAACATCGAGCCCACCGGGATCGTAATCGCGTGCTGCCTCGGAACGGACTTTCGCTTCAGTGCGCTGATTAAGGACTTCAAGACCCACAATGTTAACAGCGATCTGATCAAGATTAAGAAA…	1241	717.5	-0.137291
PF3D7_1223400	PF3D7_1223400-S1_C	ATGCTCGAGATGGTGGATGATGAAGAACTGCGTAAGCTGCGTTTCCTGTTGTCGAACAAGGGCGGTCGCATCAAATACTTCTTCTCATACATCTTCTACAAGTTGTTCTCACATATCTACAACAAGAAGAACAAGAAACGTGAGCGCTTCGTTAACATTCACGGTCGCACCTTCCCGAACTTCTTCTGCGACAACAAAATCAAAAGCACCAAGTACACGATCCTGACCTTCATTCCGCTGTTCCTGTTCTACCAATTCGCAGATTTCCTCAACCTTTTCTACCTTTGCGTCAGCCTGCTGCAGATTATCCCGATCTTCAATACCGGCTACGTGTTCACGTTCGTCGCACCGCTGCTTTTCATCATTTTCATCTCTTTGATTAACGAGGTTGTGGACGAC…	1583	730	-0.138202
PF3D7_1230000	PF3D7_1230000-S1	ATGAAAAAGAACAAGATCCGCGAGAAGTACATCAAGATACTGTTCGATAAGATCGACGATGAAAAGATACAAAAGGACCTCGAGTTTTCGAATTACAACTATAACTTTTTTATCAAGCACGACATCTATTACTTGAATAAGAAGTTCTACAAGGTTAAGAACATCAATGACATCACGATCAAAAAAACACTGTTGCTCTATTTGTATAAGCACAACTTCTACGTACCCAAAATTATCAAACGTCTCATTTTCAAAAAGCTCCTGTTGCAGAATGAAAACAATGAGAATAACGAAAATAATGAAAATAACGAGAACAATGAAAATAATGAGAACAACGAAAACAACGAGAATTTCAACTACAATATTTACCTGCTGCTGAGCTATTTAAAGAACCCAAAC…	1641	721	-0.138485
PF3D7_0106300	PF3D7_0106300-e2o3	TTCAATCCACCAGAACATGACGTAATGAAGTGCAAGCCGAGACACAAAAACGACAATTTAATAAACGGTCTAACTTTATTAAGATATATAATTATTGGAACATATGTAGGAATAGCTACAGTCTCAATATTTGTGTACTGGTTTTTATTTTATCCAGATTCAGATATGCACACGTTGATAAACTTTTATCAATTATCACATTATAACCAATGTAAAGCATGGAATAACTTCCGTGTAAATAAGGTTTATGATATGTCTGAGGATCACTGTTCATATTTTTCAGCAGGAAAAATTAAG	297	723	-0.138874
PF3D7_0930200	PF3D7_0930200-S2_C	ATGCTCGAGATTAAAGAGAACATTTTCTTCCGCGACAAGCTGATCAACGAGGAGCTGATGAACATTGTGAGTTTGAATAACTTAATCGAGATCTTCAAGACCAACATCTCGAAGATCATCAAGCGCATCAACGATAATATCACCGACTACTTCAAGAAGCTGGACGAGTTAGAGGAGAACTTCAACACGCAGATCCTGAACTTCTTCAGCGAGGTGAAGAACAACGATCACCTGTCCATCGTACTGAGCGAGGACGAGATCAACGAGTACTACAGCTATAAGAACTACCGCAGTAACATCATGAATAACCTCGAAGACTATATTAGCTCAAGCTATAACAAGGCGGGCTCAATCCTGATCGAGGAGAAGAAGAAGCACCTGTTCTTACAGTCTCGCGAG…	551	720.5	-0.139444
PF3D7_1014200	PF3D7_1014200-e1o2	ATGAACAAAAGGAAAAAGACAAAACACTTAAAAGTTAATTCTATATTGAGAATCTTTTTTTTTTTTTTCCTTATTTCTTTTCTTTTTAGTAATTGTAAATTAAATGATTATATAAGAACAAAATACCCATTCATTCAATTTGTATATTCTTATTCCAAAAAAAAGGTATGTACATCTTCTACAGATGATTCCACATGTCGTACTGTCGTTTATGGAGATTTAGATGTTTCTAATAATTCG	240	720.5	-0.139622
PF3D7_1002900	PF3D7_1002900_C	ATGCTCGAGATGTCGCAGTCGAACAACAAGATCACGCGTGCCCAGATCGACGGCATTAAGTCGAGCGAGCTTGAGCTGTTTAAGAGCATGATTATCCCGTTTAATGCGACCGTGGAGCAGTACAACAAGGACGACGAATCCGCTATTGTGCAGTTTAAGAACGGTGTCGAGAAGAAGCACATTGAGAGCCTCGGTTCTTACAAGATTAAGCCTTTATCATACGACAGCTCAGATAAGTCGGACCAATCTCTCCGCAAGCGCAACGTGAACTTCATTTGCGACCGCATCGTCATCGACGAGCACGACATTATCAATATCTTTCTGAATGCGACACTTATCGCGCCGGTCATCTTCGTACTTCTCTCACTGCTGATTTTCTTCAGTATCTTCTACCCATAC…	464	730	-0.140241
PF3D7_0305300	PF3D7_0305300-S2	ATATGGGGCTTCTTCATCCCCTTCTTATACTTTCTTTACAAGAACGAGATTAAGAAGTACTATGTAAATCGCACCTACGAGTTCTTATTCAGCTTCTTCCTGCTCTTGGACAACATCCAGATCAACATCAGCAATCTGATCGACATCGACAATAACGGCATCGACTTCTTGTCTAAGAAGTACGACCTGCGCATCAACGAGAAGGCGAAGCGCAAGTTCCTGACCCTGCACCAATTCTTCTTCGACGCAAGCTTCATCGTGGTGAACCCGCTGATCATTTTCGTAATGTACCTCTTCTCAAACTTGTTTAACGAAAACTACTACAAGGACGTGTTCATCTACACGAGCTCGTTCATCTTCTCAGTGATCACCATCATCACCCTGGTGGTGTACACGTTG…	1413	718	-0.140408
PF3D7_1314500	PF3D7_1314500-e3o4	CCAGCAGCAGCAGTTTATTCCTTCTGTTACGATAATAGGAAAAATTCTGATGTAACAATTATGTTTACACTAAGAGTAAAAGAAAGTCATAATGTGAATGACTCTGAATTAAGTACTATAGACGATGTGAAACAAATAAATGAGAAAACATCTGAGTTATTTGATCAA	168	728.5	-0.140995
PF3D7_1412600	PF3D7_1412600	ATGGTGGATCACGTTTCTTTTAAAGAGGTCAACAAAATAAGAAGCGATGATGAATGTGATGCCGATAGTCATAATGAAGGAGACAATATTGAGGACGCGAAAGCATCTGTTTTTGTGAAATCATCGTTGATTCCTGAAAAGACGGATGTAGTAAAAGGTTTAAATTTTGATAAAGAAGTAGATTTACATGAATTTATAAATAATTATAAATATATGGGATTTCAAGCAACTAACTTAGGTATTAGTATTGATGAAATAAATAAAATGATATATTATAAATATAAGGATGAAAATATAAAATCTGAACCAAATAATGAGAATAATTTAAATTGTAATAATGTTAGTGAAGATCTTAATAAGGATCAAGAAAATCATTTATATCATTATGAAAAAAAGAAA…	1488	719	-0.141114
PF3D7_1214800	PF3D7_1214800	ATGAAGATAATATTCATCGTATATATTTTTATAAGTACCTTTTCTTGGAAATCTATATTATCATATAGAAGATTAAAAGACATTAACAATATGGATGGCATACCCCAAGGTTTCAGCAAGAACAAACAGATTAACTTCCATGAATTGAGATCCAATGCCAACAAGGATAAGGAAAAAGCGTATACTTATGAAATTAGTGAATGGATTATTATGATAAATCCAAGAAATGCAAAAACACATACTGGAAAAATACGTAGTATTGAAATTTATTCTATGACATATCCTTATGAACAGCTGGAAGTTTTTAAGGAGAAATTAAAAAGACCA	327	719	-0.141541
PF3D7_1311800	PF3D7_1311800_e1s1	ATGAAATTAACAAAAGGCTGTGCCTATAAATATATTATTTTCACAGTGTTAATTTTAGCGAATATTCTTTATGATAATAAAAAAAGGTGCATGATTAAAAAAAATTTACGTATTAGTTCGTGCGGTATAATAAGTCGCTTGCTCAAATCTAATTCAAATTATAATAGTTTTAATAAGAATTATAATTTCACGTCTGCTATATCAGAATTACAATTTTCCAATTTTTGGAATTTAGATATTTTACAAAAGGATATATTTAGTAATATACATAATAACAAAAACAAGCCTCAATCATATATAATACATAAAAGACTAATGAGTGAGAAAGGAGATAATAATAATAATAATCACCAAAATAATAATGGGAATGACAATAAGAAAAGATTAGGATCTGTTGTA…	1659	726	-0.144923
PF3D7_0201900	PF3D7_0201900_e2s3	AATTCAGCTAGTAAAGGACAACAAAATACTGGTTTAAAGAATACACCTAGTGAAGGACAACAAAATAATGATTTAAAGAATGCACCTAATGAAAGACAACAAAATACGGGTTTAAAGAATACACCTAGTGAAGGACAACAAAATACGGGTTTAAAGAATACACCTAGTGAAGGACAACAAAATACTGGTTTAAAGAATACACCTAGTGGAGGACAACAAAATACTGGTTTAAAGAATACACCTAATGAAAGACAACAAAATACTGGTTTAAAGAATACACCTAGTGAAGGACAACAAAATACTGGTTTAAAGAATACACCTAATGAAAGACAACAAAATACTGGTTTAAAGAATGCGGCTAATAAAGGACAACAAAATACTGGTTTAAAGAATACACCT…	2436	725	-0.145605
PF3D7_0908000	PF3D7_0908000-e1o3	ATGCTCACTAAAAAAAAGTGTTGGAGACTAAAAGGTGGGATGTCTTTGGTATCTTTTTTTTGTTTTTTATCTTTTTTTTTGTTTTTTTTCCTTTTTCATAATAATAATAATACCATATTATATGTGAATTGTTTTAATAATGAGGGGCATGAGGCGATAGGTATGGTTGCGATGTCTGGTTTAAAGAATGAGCAATTATATGAGCTCAAGAAATTATTAAATGGTAAGGATTTAGTAGATATTGGAAAATGGGGACATATAGTACATGATAAAATAAATGGAGCTAAAAATATGCATTTTAATTTACAAGAAAATGATTGTAGAAATATAAATTTTGAATGTAAAGATACAAACGGTTTATGTTTAATAAATTCAATAAAATATTTTTATAATAAATTA…	1062	717	-0.146528
PF3D7_0210700	PF3D7_0210700	ATGATCGACCTGTTTGATCATTTAAAATCCCTAGGGATAAAAAAAAATAAAGGAAATGCAAAAAATATGATACAATGGTTTATTTTTAAAAAAGATAAAATAATAGATAACACGGTTGATTTAAATGAAGAAACAATTCTTAATATTGATAATGAAAAGAAAAGCGATTTAAGAATATATGTGGATAAGGTTGATAGTATAAAAATGGAGATAAAAAAAATTCAAAAGAATGTAGATGAAATATCATGTTTAAAAAATAAAATAAATATTTCTATTACTGTAGAACAAGAAAATGAATTAAGTATAGAATTAAATAAACTTATAAAAGATACAAATGATTTAATTAATATAATAAAAATTGATATACGTAATTTAAGAAAGAAATATGTTCTAAGATCA…	942	717	-0.146709
PF3D7_1471900	PF3D7_1471900_e2o2-s3	AGTAAAAGATTATTTCAAGAAATTAATAATTTGTATATGAATAAAAACTTATTTTATTATTTGGCATCAAATGTTTTAAAATACGATGAAGAATCCCTCCGTTATATATTTTATAAATTTTTTGAAAATGATATACAACAAATAAATATGAACGAATTTATAGAAATGTGTAAAAATATCGAAAACTTGGAAAATATTAAAAATTGTTCTTTTTTAATAAAAATAGAAGAAAAAATCGACAAGAATCATGTTTTTTTTATATCGCTAGATAATAACAATTTCCATAATAACAACCATTATGATATAAAAAAAAAAATAATGTATAATGATGAAAACCATATTATAAACCATAATACAGATATATTATTTGACGGAATCTTCACATATGGAAAGAAAACA…	1380	732.5	-0.147654
PF3D7_0513000	PF3D7_0513000_e1s1	ATGAATTTCGTATTTATTTATATCGTCCTGATTTCCTTTTTTAATAAAAGCAGGTGTGATAATGAATTGTCTGTCAAGGGGAGTTTGACAGTTGCCAATTTAAAAATATCGTCTAAAAATAATCAAGAGAACGGAATATTATTTGTAAATGAAGAGAGTGAATATAAAATAGGATTAAATGAAAGAAGTGAATTAATAATAAGTAAAAAAAAGAAACCTCTTGTAACTATTGATGAGCACGAAAATTTAAATTTTTTTAATTTGGATTTATCTGTTAAGATATTGAATATACAAGGAATATTAAAAATTATGAATGTGAATCAATTTCAAATGTTTGTTCATGAAGATTTTTCAAATAGTTCAAATACCAAAGGATGGATTGGAGATCAATTTTTTAAT…	807	728.5	-0.14836
PF3D7_1212400	PF3D7_1212400	ATGAATGCGGAGATGAAAGGTACACATTTGAAAAGTGTAGAGTGTCCTGAGAAATCTAATAAAAAATACAGCAATCTAAAACAAAAAGATAATAGTGATAATGAAGAGAAAGGTACCATCACATTAAATAAAGAAGAAATAAATTATTGTAAAACTTTTTTAACAAAAAATAGTATATTAAAAGATGAAAAGGTTATTAATAATATACATAATAATGATAAGAATTATAATAAGGTTATTTCCGATAATAAAGATATATATGATATACATTGTGAAACTAATGACTCTATAGTTGTAGATAAAAAAAGAGATATGCATGATAAAAATAATAAAGAAAATTGTGATATTAATAAAAAAAATTTGAATAATAATATAACAGATATAAAATTATCTGATGAT…	1020	716	-0.149235
PF3D7_0529400	PF3D7_0529400_e9s1	GGTATTAAACACCGAGTTGGGTTATTAGATTATCTGAACAAAGTAGAAATAAACTTGAACGCCTTTGCAAAAATTATTGAAGGGAGAATGATATCAAATGATGACGTAAAAAGTCAATTATTATCCATACAAGATATGAGTGAAGAAGGGTTACTTTCGAAGCTTTTAGAAAATTTGAAATGTAATAAAATTGATATAAATGCTGAATCTTTTAAAACACCAACTTCTTTTTTTGTTTCTCATCACTTACCTATGACAGTATGTTCATATAGTGACCATTCAAATAATCATGAATTAAAGGATATGAATGAAACTAATAGTAATGCTGATATTAAAGATGATGAAAAAAAAGTGACTGATGAAAATGATGCCATAGATACTCAAAATAAAAATGAACAC…	405	715	-0.149349
PF3D7_0722700	PF3D7_0722700	ATGTCAAAAGCTGTATACTCCAAAATATGGATGAGCACAAATAACTTCCACACAAGGAGAAGATACGGATGGTTTAAAGTTTGTTCTCGCTTGAGCCCATGGGTATATGTATGGGCAGTTTATGCTGTGTCTATTGTCTTTCCCGCTTTCGACGATGAGTATAAGAAATTCTTAACCTTTGGAATATGGAAAGAAAATGATGTTGGTTACAAAAAAAGTGCTCCTCAACCTTATAATTACCCATACGATGTTCCAGATTACGCTTAATAGTGATAGTAATAATGAATGTAATGATGATAG	300	716	-0.149574
PF3D7_0409000	PF3D7_0409000_s1	ATGGTCATCATATATATTTATTTTTTAGTGTGTTCAATTATTATAAGATATGTAAAAACAAGAATTTCATATGATGAGATTATATCTTTTAATAATTTGAATGAAAAAAATGTATTAACATATTATAGTTATGATGACGATTCTGATGAATGTTATATGTGGTATTATTTTAAAGAAGATTTTTTTGAAATATATTATTTAAAAGATGAATATAATATAATAAAGAAAAAACAACGAGAAATGATTAACAAAGGTGTTATCCAGACAGAAATATGGGACAATATGTATAAAAATAATATTGATAATATTAATAATATTGATAATAATAATGTGGATTATAAACATCATAACTTCTTGGAAAATCCAAATAATAGTAACTCGTGGATTCTTAGCGATAAT…	2607	724.5	-0.150051
PF3D7_0709000	PF3D7_0709000_e2s1	AATGGCTCACGTTTAGGTGGAGGTTCTTGTCTTGGTAAATGTGCTCATGTGTTTAAACTTATTTTTAAAGAGATTAAGGATAATATTTTTATTTATATTTTAAGTATTATTTATTTAAGTGTATGTGTAATGAATAAAATTTTTGCTAAAAGAACTTTAAACAAAATTGGTAACTATAGTTTTGTAACATCCGAAACTCACAACTTTATTTGTATGATTATGTTCTTTATTGTTTATTCCTTATTTGGAAATAAAAAGGGAAATTCAAAA	270	714.5	-0.150241
PF3D7_1036800	PF3D7_1036800-S2_C	ATGCTCGAGATCGACCTTATGACGGTGTCTAGTATGTCTTTCCAGAACATCATCAGCGATCCGAAGATTGGCGGCACCTACATGACGTTCCTGAACACCGTCAACAACCTGGGTTCTCATTGGAGCACCATCTTCCTGTGGCTCTTGGACTATACCGACAAAGAGTTCTGCTACAAAGGCAAGTGCGTATTAGTCGACGGGTTCTACATCCAAATGATCCTTAGCTTCATTGTAGGTATCATCATCAATAAGTACATCTTATCTTTCACACGCAAACTTCAGGCGTTCCCGCTTGAGGACTGGCGCACCAAGTACATCGGGAAGGAGTTCTACCCATACGATGTTCCGGA	404	711.5	-0.151598
PF3D7_1232300	PF3D7_1232300-e2o3	GATGCGACCGATGCATTTAATTCTATTGGACATTCTGAGAACGCCAAAAATTTAATGAACAGTTTTTTGATTGGAATAAAGAAAAATTCAAAGGAATATAAAAAAAAAGAAAAAACAAAAATTATTGAAAATAAGATAGAATATATAAATTATTCTGATGAGGAAATAAAAAAGGAAGAAAAGGAACCTCAAGAAAGCAAACCTAAAGAAAACAAACCTACACTG	225	714.5	-0.152086
PF3D7_0601900	PF3D7_0601900	ATGACCGACCACCTGCTCGACTTCAACATGTACGGTTCGCAACTTCATAACTTACTGCATAATGCATTCTCGACCTGCCTGGAAGAGTCCGAGCGTACGTGTAAGCGAACGTACGTTGTCGCGATCCTACTCGCGTTTCTCGTTCTACACGCGCTACTATACATGAAATATAAAAAAAACTTCAAACTGAGCGGTCTGTTTAAAAAATCGAAGAAACGGACGAAGATGTCGAAACATTACGAAGACGACGACGATGATGACGACTATCAGCCGCCGCGCCATTCGTCGCTGCCGAATGAGCGTAAAACCAGCTCGAGTAGCCGCCAGGCGGCGCGCAGCCACAGCAGCTCTTCCAGCGTTTATGCCAGCGCCAACGCGGAAAAC	384	722	-0.152722
PF3D7_1440500	PF3D7_1440500_e1s1	ATGAAAGAATCAAGTTCTAAAGAAGAAGGGGGGATATATAACCCTTTATGTAATATGAATGATAATGGAACTTGTAAAAAAAGGAAACTAAATGAGGGTGACATAAGTAATGATATAAATGAAGAGAATAATAATTTTAATAGAAAGAAACAAAGAAAGGATATGAAAAATATAAGACAAATAATGAATATATTTAATGGTATATTTAATTGGATTGTTAGTAAAGGTATGAATAAGATTCCTTGTAGGGAAATAGAAAATATTAATGATGTGGATTTTTTTAATTTTAATAATGTGTTATCAAAACATTATGGTTCTAGGATAATATTTGTTACTGATGATTCTATAAGTAAATCTGAAAATATATTGGTAGAAGATGATAAAGTTGGTTGGATTACT…	1659	714.5	-0.152956
PF3D7_1302000	PF3D7_1302000-e1o2	ATGGTAGTGCTATATAATAATAAGGAAGATATAGCTGTATGTGACGATGGAGTTAATAAAGAAGTAATTAAAAATATTTTTATGGAAGACATTGAAAGTAAAAGAAGAAAGGAAGCAATTGTTAGAAAACGTAGCATTGTACATTTTGGTTTAAAATTATTTTTATTTTCCTTTTGTATTTGGACTTTACAATATGCTAACAATAAT	207	715	-0.153843
PF3D7_1149100	PF3D7_1149100-e1o2	ATGATGAAGCTTTTTAATAATTTTACATGCTTTTTATCCCAGTCCATACGTTCACAGGAGAAAAACGTAGAAGAATATCACATGAGTACAATTGATGAAGAACCAATAAATTATAAAAACAAAAATTTTTTGAAATCCTCCCTTTCAAGGCATTCCTTAGTCATCCTTTCTATAATTTATGTTTTGTTTCAC	192	714	-0.155243
PF3D7_1477300	PF3D7_1477300-e2o2	AATGGCTCTGTTGACGGAAGAAAATCCTTGTATCCAAAGAAATGTTCGAGGAAGTCGAGAAGCCTCTCTGAATTAGTACTTGCTAATTATCCTTCTTCAAATTATGCTTTTTCAAATTATGCTTCTGCAAATTATTCTTCTTCAAATTATCCTTCTTCAAAAATGGATGATTTAAAAAGGCATGAGAATAATTGCAGTAGTTCAAATAAAGCTGTGGATGAAGAAGGTATCTGTAAGGATACTTTTGGAAATGCTCTTGATGTACCGAAGTATGAGAATGATTCGTTTCATAGGGATTATCACAAAAGTATGTTTGATATTAAAAATATTAAACTCGAAGAAATATCCTTGCCGTTATCCAAACTGGAATTAAGCCATATTATTAGTAGGCTAAATAAA…	654	714.5	-0.155983
PF3D7_0322600	PF3D7_0322600-e2o2	AATGAAGATGGTGTAAGTAAAAATAATCAAAATGAAGAACAGGAAGAAAGTCTATTTAAGAAAATATTAACAAAGAGTTATAGTTCTTTTAAAGGGAAGTTAATGCAGAATAATTTGAGTGATGTTGATGAAGAGGATCTTGGGTATGATAAAAGAATATCTAAAAATTTTATTTTGGAAGAAACAGGAAGTGATCAAGAATATATACATACATTGGATAATGTGAATAATGATTTATATGATGATCGAAGAAGTTTTTACACTTCCCCTCAAAGGAATAGATATAGCAATAAGAATTTAAGAAATGAAGAACATTACAAGGTAGATGTAAAAAATAAATATAATATAAAAAATATGGTAAATAATATGGAGAATACAAATTATAAGAAGAGGGAAGAT…	1986	718	-0.156047
PF3D7_0924000	PF3D7_0924000-e2o2	TATAATGGAGATATAACGTTACATCCCAAGAGACTTTATTTAAAACATTTCAAGTTAATTAGTGTTTCGAATTATGACGACGTTGAATGGTATATACAACAAGGAAGACAAATGACTTTTCAAAAGTTGCCCTTAATTTTGAACAGAATGAAAATTGAAAAGAAATTAATAAAAATGAAAAAATGTTTTTTT	192	712	-0.156255
PF3D7_1403900	PF3D7_1403900_e1s1	ATGGTTTTAATCAAAGTGGAGAATCATGAAGGGAAGAATGTGAATGCCAATAAATTTGAGCCTTTTTTTTTTGTATTATTTGGTGATATACAATATGGTATGATACGAGGTAATCATGGTTGGTACGAAGAAAGAGAATTATTAAAAAGTGCTATTGAAAAAACGAATAAACTGAAGCCTCCATTTGTGGTAGCTTTAGGTGATTTAACAAATAAGTTTCCTCTTGATCCTATACAAACCAATCAAATTACTGATTTAAAGAATGATTTTAAATTATTAGATAAGGATATTGATTTGTATGTATTTTGTGGTAATCATGATGTTGGTAATAAGCCTTCTATGGAAGGTATGGAATATTTTGAAGAGCAATGGGGTGATAGTTATTATAGTTTTGTTTAT…	873	711.5	-0.157891
PF3D7_1023100	PF3D7_1023100_e1s4	GGATATTTAACAAAAAACAATGAATGGATTGATGGTGCTTTATCATCAATTATGAGAAAAATGTCTAGAAATATTAGTCCATATAATGAAAATATAAAACATAAAATAACTTTATTAGATGGTAATATAGATGCTGAATGGATAGAAAGTATGAATACTGTAATGGATGATAATAAAGTATTAACATTAGTAAGTAATGAAAGAATACCCTTTACTAAAGAAATGCACTTATTTTTTGAAATCACAAATATGAAATATGCATCACCTGCTACTGTTAGTAGAGGTGGAGTTCTTTTTATTAATAAAGGAGATATTAGTTATAAATTATTTATAAGTTCATGGATTAATTTGTTAAATAATAATATCGCAAAAACGGAATTTTATTATCTATTCAATATT…	2892	720.5	-0.159187
PF3D7_1351000	PF3D7_1351000_e1o4-s2	GATTTAACCATAAAAAATAACCTCAATGGAAATCATAATAATGTTATAGATAATATAGAAAAGAAGAAAAAAAAAAAAAAAAAAAAAAAAGAAAAGAAAATGGAATCGGAAAATTACTTTTTCTTTAAGAAAAATGAAGAAAACAAAGAATTTGGTGAATATTTATACAGACTAAATGAAGGCATGTTTTATTCATGGAAGCTTCGATACTTTGTTATAAAAAATAACAAATTGTGTTATTATGTTAATCATAGTAAAAATGAGCTAAAAGGAGAAATCGATCTCCTGAATGCGCAGATACAATGGATAGGTGAATATAAAGGAAGAAATAGTGTTTTTGTAATAAACTCCTTATCAAAGAATGTTAATTATTTAAGTTCAGAGAATGAAATACAAACA…	1500	713	-0.159893
PF3D7_1023100	PF3D7_1023100_e1s1	ATGAGCAAAAAGAATGATGTATATGAAGAAAATGGAGAATATAATCCTAAGGTTGAAGAACTTTTAACAAGCGCCTTAGAATTTTTTAATATTCATGGGCTTGCTAGAGAGGAAGTTATAAATAATATAAAGAAAGACGAAAATACAATTAAATTATTAAACGATTTTTATGAAAAGAATGAAGAATGTTTATTTATCTTTAATGAGAAAGATTGTATAAAGATATATAATTCTATATTAGATCTCTATAAAAAACGAAAGAATGAGAAATTTTTAATTATATATAAGACCCCACAAAGTAATATTTTATATTTAGAAATGAATAATGATGCTGAAAATGTTATAAGAAATTTTTTAGAAATTTTTTTTTCTAACTTTATGAATAAAAATGAAGATATA…	2892	713	-0.159893
PF3D7_1324600	PF3D7_1324600_e2o2-s4	AAAAATATTTATAATAATATGAATATTAAGAAAAAGAAAAAAATGTATTTAATCTTTTTGATTTTGGTAAAAAATTCTTTTACATGTATATATTATAAAAATATTTTTTTGGTATTTATATCATTTATAAAGAAGATATTTATTTATTTCCTACAATTAAATATTCAACATTTTTATGTAACGGTTATGAGACAGAATGATCTTACGAAAAATAAAAATAAGAAAAAAATAAAAAATGATGACAACATAATTGATGATGGTGATAATGATGATAATATATACATCAACACATTTAAACAGAACAATTATCAACATCGAATAAATTATATGCAAGCATATTATCCAAAGAATAACAAATTAAAATATTATTTTGATTTATTTCTTGATTCTTTTAATTTT…	498	718	-0.160023
PF3D7_0509100	PF3D7_0509100_e1o1-s3	TTAGAAGATAATGAATGTAAAATTGTTATAGCCAAAAAAAAAATTGATAATTTAAAAAAACAACTTGAAGATATTGATGATCAATTACAAAATTCCAAAACACCGGAACTAACCAAAGAAGAAGAAAATGAATTAAATACATTAAAAAATTTAATAGAAGAAAAAAATAATGAAAAAAGTAAAGTCGAAATTGTATTAAAAGCACAAGAAAATAAAGTAAAAAAATATTACGAACAATTACAAGATGTTGGTGGAGAAAAAAAAAAAAAATTAAAAAATAAATTTATTAATGCTGAAAGACAATTAAATATTATGAAAGATCAATTACAAGAACATACAAATGAAGAAGCTAATGCTTTAGCTAGTTTAGAAAAAAGTGAAAAGGATATCAAAATGTTT…	1500	718.5	-0.162114
PF3D7_0525900	PF3D7_0525900_C	ATGCTCGAGATGTCCAAGCCAAAGATGATCGGGCCGTACGAAGTCGTGAAGTCTATTGGTCGCGGCAGTTTCGGCATCGTCACCGCGGTGAAGGACGAAAACGAAAAGATCTTCGTCATCAAAGAACTCGATATCAGCTGCATGAATAATAAAGAGAAGATGAACGTGGTTAACGAGATCCGCGCGCTGATCAAGATGTCCGTGCATCCGTTTATTGTGCGTTACAAGGAAGCGTTTGTGGAAGACTGCGTGCTTTACGTGGCTATGGACTACTGTATTAACGGCGACCTTGGTAAGGTGATTAAGAAGCACAAGGAGTTGGAGACACCTATTCCGGAGAAGAAGATTAAGCGCTGGCTGCTGCAGATTATCATGGCGATTAAGTTCATTCACGACAAG…	941	708	-0.162648
PF3D7_0934300	PF3D7_0934300	ATGAATGGACATAATTTGTTTCAACATTTTATGAGGAATATTTTCTTTAAGCATACCTTTAGAGTTGTAAGTAAGAATGTTGTGGACAAGGGGCAAAAAGGTTTAGGAGGAACCATGTTATTAAGTTCACCAATATTATTTGAAGTTAATAATAAAGAAGAAGAAAATGCTCCCAAAAGTGAATATATATTTTTGGCTGGAAAAAGTATTGATTTTTTAACTCAAAAAATATTTGAAAATGAATTTGGAACTTCCATATTATATGTTGCATTTTTTGTAGCATATTTATCTTTATTAGTTCATGATAATAAAATTAATTTAATGGTACGGAAATTAAAATATAAATATGCAAATAATATGTTTACAGTAGGACATCCCAATTATAAAATGTATTTACCA…	435	716	-0.164694
PF3D7_0217100	PF3D7_0217100	ATGAAGGCTAGCGGATTATGCCAACAATTGAATAAGTGCATGTGGAATCAACTTGTCGTATCGAGGAAGTGTATAAAGAAGTTTGTTTGTAATTATTCAACAAAGATTAGTCCAATAGAGATATCAAAAATATTAGAAAAGAAATTTGAATCTTTTAATTTCAAAACGTCGTCTAACGAAGTTGGTTATGTGTTGAGTGTTGGTGATGGTATATGTCGAGCTTATGGATTGAACAATGTAAAATCTTCTGAGTTGGTAGAGATACATAATGAGGATGATAAAGGGAGTGTTACGTATGGAATGGCTACGAATTTAGAATATGATAATGTTGGAATTGTAATATTTGGAAATGATAGAAATATAAAAGAAGGAGATGTAATAAAGCGTACAAATCGTATT…	1653	706.5	-0.165116
PF3D7_1033200	PF3D7_1033200_e1s1	ATGAAAGTTGGTAAAATATTCTTTTTGTTAAACATCCTTGTAGTATGCCACTTCATTATATCATGCTTATGTCGAAATGGACAAACTACTCGTGGGAATTTATTAGCATTAAAAGCCATTGAACAGGATTTACAACAAAAGAAGAATAGAAAAAGAAATTTGATTTTATATTCACTAGGTTCTGCAGCATTAATAGCTGCCCTTGTCGTTACAGGTATAGGACTTAATATGTATATGAAAAAGAAAAATGTTGACTCTGAGGTACAAGAAATTATAGATGAAAAAGATGAAAAAGTTAAAGAAAAACCAGCTGAGAAAAAAAAAACTACAGTAAAAATAGTTTCCAAAAGAGTTCCTGTAAAATCTAAATCTTCAAATGGTAAATCAAAAGCACGTACC…	1065	661.5	-0.165309
PF3D7_1333000	PF3D7_1333000_C	ATGCTCGAGATGAAGATCATCTTCCTGCTCAACATTGTCATCTTGTTCCTGACGAACGTTCTGACGAAGAAGCATGTTATTAGCAACACCTTAAACTTCATCAACGTGAACCCGAAGCAATTCAACAACTCCACGAAGCGTCTGAAGGCGACCGAGTACAAGATCGACAACAAGGTGATCCGCGGACCACTGACCCCGCTGAACGAGTACATCCTGATCCAGAAAGACGAAGCGGGCGATACCACTGATTCCGGCGTCTTCATCGGCGACACGTTGAAGAAGAACCAGTACATCGGCAAGGTTCTGAGCGTGGGTGCGGGTGCCATCAACACCAAGAACGGCGAGCGCATTCCGATCGATATCCAGGTGGGCGACGTAGTGATCTTCAATCCAAATGAC…	857	707	-0.165456
PF3D7_0731800	PF3D7_0731800-e2o2	ACATTTTTGCACAAAACACAATTATCTTCTATTTTGGGATATCAGGGTATAGACAAGATTTTATTATTAGGAAAAGTAGATATGGCGAATATTTTGAATGAAAAATTATATAATTCAAGAAAATATATGCATAAAATATCAAGGGGGGTTTTATATAGTGATGATGATAATACAGTTGATGATTATAAAGATTATAAAAATAAAGATGTAAAATCAAATAAGGAAAATAATAATATTTCAGGGAATAAAGAAAATCATGGAAACGAGAATAATATTATTATGGAAGATGGAAATCCAGAGATAAGTTTTTTCACAAACAGAGAAAATTTAAAAATAGCAAAATATTGCTGGAAACCCAAAGAAGAAAAAACTAAAGCATATATTTTTGCTCTACATGGA…	1965	719	-0.165824
PF3D7_1032300	PF3D7_1032300	ATGACATTTTATAAAAAAGGATATAGGAAATTATTCATACATTTTAACAACAATGTAATTATAAAACACAATTTCAGCACCTTAGATATAAACAGGGGGAGTTTAAAAAAAAAACAAACAAAAGAAAAATTTGAGGAGGTATGGAAGAATATTATTCGTAAAAAGTATATAAAAAAAATTGTAGATATTTTTGAAATAGAAGAAGAAAAAAAAAAAAAAAAAAAAAAAGATTATTATGTTAATGTAGATTTATATGATAAACATAAAAAATGTAATAATCATAATAAATATAGAAAGATCGATGAAAATGTAAAAGGTATACATCTTGTTGATGGTTCAAAAAAAAATATACAAAATGATGAATATACATGTGATGATAACCAAATTGTGGATCCTCCT…	2613	715	-0.166141
PF3D7_1122900	PF3D7_1122900_e1s1	ATGACAAAATTTTCTGAAGGCCATTATGACATCTTAAATTTAATAGAGGTAAAGAGTAATATTCAAGAGAAAAATATACTAGGATATAGTATTGATTATACTGTAGGTGGGTTATTCTTATTTGGGGGTTTTAAAATAGATATAGAAGAGAATAATGGAATAATATGTAACGATGCTTATTTAATTCATATAAAAAACGATAAGGCAGAGTATGAAACTCTGAGTATTAAAATAAAACCATCTATTAGATGTTATCATAATTCTTGCACATTATTAGAAAATTATGTTATAATTTTTGGTGGATTGAATAGTGAAGTTCCTTTTGTTGCTTTGAACGATTTATGGGTATTTAACAGTTTAAATAAGACATTTGTTGAAATAAAATTAAAATGTAAAGAA…	2820	709.5	-0.166572
PF3D7_1109100	PF3D7_1109100-e1o2	ATGAACAGAATGAATGATTTAGATATCGAAGAATATAACAGGAATATAATACAAGAACTTAATGAAGCCGCTGAAGAAGGTGAATATCCGTTGTCTATGTTTTTACATGACCTTATAGAAATAGACATGGAATCAAATTTTAGTTATAAATATATGATTATAAATAGATTAGTTGAAATATGTATAAATTCTATTAATAAGAAAATGTTTTTTTTAGCTGATGAGTGCATGTATTTTATGCGTTATTGTATAGATAAATGTATAAATTTAAAAGATGAGATAATTAAGAATAGTTCCTTTTTTAATAATATAAATATTATAATAGACATATGTTCAAAAGAAAAGGTTTATAATAATGATAATTTGTATATTTTTGAAAAAACATTTTTTTTTTTTATT…	1242	715	-0.167541
PF3D7_1024800	PF3D7_1024800_e2s1	TTATTTCCTATTTTTTTTTTTTTTTTTTTTTTTGATTTAATTTTTTCCATAGCCTCTTGGCTCATCTTATCACATTATATCATATTTTACTTTATTTTGTTTAATTTAATTTACTCTTTTTTTTTTTTTTTTATTTTTATTTTTATTTTTATTTCTTTTTTCTTTTTTTTTTTTTTTTTACTTTATGCTACCCTTTTTTTTTTGATTATAATATTATTTAATAAGATGCAAATCCCAACAAAATTTTTAGTTTTTTTTAATTTGGTTATATTATTTGTATTTTTAAATTTTGAGCGTGTAGAGTTAAAGTTAAACAATATAATATATGACAAGAATAATTTTAGTAACAATAATTATAATTATTATGTAAATAATAATAATGATGAAAATAACGAAGGA…	2340	671	-0.167603
PF3D7_1218800	PF3D7_1218800_C	ATGCTCGAGATGCTGCTCTACTTGTACAAGATTTGGTACTTAATCCTGCTGTGGCTGTACACGCACAACCAGTACAAGTGCGACCTGCGCCTGAAGCCGCCGGAGTGCGACGTCAGCATTGATACGTCGATTTGCATCAACAACGGGCAGAAGATTCTGTTGCCTTCCGCGAAGCCCTACGGCATCAGCACTCACATTACCTTCGACTCATTGATGCCGGTGGACAGTACCGGCAACCGTAACCACGCGCACGGCAAGTTCTTCGCAAGCTCCGGGTTCGGCGGCATCGGAAATTCCGCGCTGTTTCGTCAGAACTACATCTACATTCCGCACTCAGACGAGTACTTTAAAAGCGTAGACTTCAGCTACACTTTCTTCATTTACCTGCTGCAGGACGAG…	1130	715.5	-0.169829
PF3D7_1237700	PF3D7_1237700	ATGGGTTGTACTGTAAGCAATTTGAAGTGTGTCACCAACGTTGCGGGCTTGGCCAGCCTCGTCATCAGCCTGTTCCCGAAGCTGATCATCAAGAACCCGCAGGTGTTGCGCCCTCTCCTGAACGTGTCTTGGGGATATCTCTTCGGCTCGACATTCTGGCTGTGCTTCTTCTCAGAGGTCGGGCTGCTCCGTTCACTTAAGAACATGAAGGGCGTCCCATTGCCGGAGAGCGCCAGCGAGGCGAAGAAGCTTCTTGAAGAGATGAAGAACAGCGAGGGCGACTTCAACCGCCGTTCTCTTGACTTCCAGTACTTCTTCTCACTGGCCACGTTGTTCAGCGGTATTCTCCTGCTGAGCACTGTAAAACTGGCGAACCACAACTTGCAGCTTCGCTTGTCG…	630	703	-0.170333
PF3D7_1315900	PF3D7_1315900-e3o4	ATGCAAGAAGTAATGAATATATTTCGTTTGTTCTGTGGATTTAAAGTTAGTGCTAATTGCCTACCAAACAAAATTATTGAAAGCTCACAAATATGTTTACAAAATTCGCTCTTGTCAGTCTTTAAAAATAATCCAAATGACATTGCAATTTTGATACAA	159	717	-0.17522
PF3D7_0811200	PF3D7_0811200-e1o2	ATGAACATTATTGATAAAAGAAAAAATAAAAAAAAAAACAAAAAAAAAAAAAAAAAAACGAAGAAAATGTATAATTACAAATTGTTGTTTCATGCTTTTATATATGGTATATTATCTTTTATAAAGATATGTTATGGAAACTATGCATCTTATTCAAATAATACTTATTTAATAGGTCACGTGAATAATATTATACCTATACCAAATAAATTAGATAATTTAATTCTTCTTTCGAGTTATGATGGCGTTGTAGGATTATTAAATTATAAAACA	273	707.5	-0.181487
PF3D7_1249800	PF3D7_1249800_e1s2	AATAACTTGTATAATATATATGAAAATGTAAAAAGTTATACAACTCAATCGAAGGAAGTAGTAAAGAGGAGGGCTTCATCTACTCTTACGAGCTCGATCAATAATGTGAATAATACAAATAATACAAACATTTTGAATAATACAAACATTTTGAATAATACAAACAAATTTAATAATATTAATAATCATATTCATAATAGTTACTTTAGTCCTGCTTCAGAGAAAGAGTATAAACAAGTTACATTCTCCTCATCTTTCAAAGAATCATTTGTTAAAAAGAATAATCCTAAATATAAATTTTTAAATAATTGTAAAAGTTCAACACAAATTCTGGAAGAATCGAATCCTATATATTTATATGATCATATCATAAGTTTTTTATTAAATACACAAGATAAG…	2754	707.5	-0.181649
PF3D7_0422000	PF3D7_0422000_C	ATGCTCGAGATGAACGGATTCTCGTCGGGCTACATGCGTTTCATCTTCTTCATCGGCCTGCTGGTGATCTTGAAGAACATCCTTTACTTCTTCTTCTGGTTATTCAACTACGTGAAGAGCAAGATTGTGTTAAAGAACCTGAAGTCTTACGGTGACACTATTATCATCACCGGCTGCACCGACGGCATTGGTAAGTCTCTCACGTACTCGTTGATTAACCAGAACGTCAACCTGCTTTTAATCTCCCGCAATGAGAGTGAGCTGAAGAACATGAAACGCGACCTGCTGGAAAAGAACAAGAACTACAAGGGGACGATCGAGTACATCACCTTCGACTACAACGCAAACGACTTCAACACCTATAAGATCATTGAAGCGAAGATTCGTAGCATGGACATT…	1046	707.5	-0.182203
PF3D7_0714100	PF3D7_0714100	ATGAGTTCTCAACATAGGTATGAAAAAACAAATGCATATCGAGAAAACGATGAAAACATAATACACAATGAAAATAGAAAAAATATAAATCGTAGGAACGATAAAAACTATTATGGTAGAAATGAAAAAAGTGGTGAAAAATTAAAAAACCAAAAAAAAAAAAGCACATACGATAGTAAGACTAAAACGAAGATATCGGATGAAAATGAATATACAGAAAGAGAGGAACAGACAATTGTTTTAAATAAAGAAAATAAATTAATAGATGAAAAAGTAAAAATAAAAACATTGAAAATGGAAAATAAATTGGAGGAAGATGGAAATGATAATAATATAGACAATATGAATGATAATAATATAGACAATATGAATGATAATAATATAGACAATATGAATGAT…	2046	713	-0.183164
PF3D7_1030900	PF3D7_1030900	ATGAATACATATTTTAAGGTACTTCTTTTTTTATTTATTCAACTTTACATAACGTTGAATAAGGCTCGGGTTACTGAAAATACAATATGTAAATATGGTTATTTAATTCAGATGAGTAATCATTATGAATGTAAGTGTATTGAAGGATATGTATTAATAAATGAGGACACGTGTGGAAAAAAAGTAGTCTGTGATAAAGTTGAAAATTCATTTAAAGCTTGTGATGAATACGCTTACTGTTTCGATTTAGGAAATAAGAATAATGAAAAACAGATAAAATGTATGTGCAGAACAGAATATACTTTAACTGCTGGAGTATGTGTTCCTAATGTTTGTCGAGATAAAGTATGTGGTAAAGGAAAATGTATAGTAGATCCTGCAAATTCTTTAACACATACA…	654	706.5	-0.184458
PF3D7_0104400	PF3D7_0104400	ATGTCAGTTACCACATTTTGTTCTTTAAAAAAAACGGACAAGTGCAATATTTATATTTCAAAAAGGGCTTTCTCTGTGTTTTTATTTTATTTGTTTTTTTTTTTATTCTTCCATTTTTATTTTCTATGTTCTTCATCATTTGCTGTTATCATACATGAAAGTGAAAAAAGGAAAAATATCATGAGAAGGAAAAGATCAATACTACAAATATTTGAAAATTCTATAAAATCCAAAGAAGGAAAATGTAATTTTACAAAAAGATATATAACTCATTATTATAATATCCCATTAAAAATCAAAAAACATGACTTACCCAGTGTTATAAAATATTTTTCTCATAAACCTAATGGAAAGCATAATTATGTTACAAATATGATTACACAAAAGAATAGAAAATCG…	1605	698	-0.184919
PF3D7_1442300	PF3D7_1442300_e2s1	AAAATAACACTGCAATATAAGAACAAAACATACAAGGATCTCTTTTGTACCTTATATGCCTTAATTGATATATACGATTGTTATAGTGAGCTTTTTAATGAAGATGAAGGGAAAGTTAGTGAGAACGAAGAATTTATTTTTCATTTAGCTAGTGATAAATACATATTAAAACAGTCTGATATGAAGCATTTAAATGACTTGTTATGTGAGAAGTCTTATATTATATCTAATAAACATGCATCCATAGTTGATATATTTTATTTTTGTGCAATTCACAAGTTATTAGATGAAATGGCTGTAAAAGAAAGAATCGAATTTTCATATATTTATAGATGGTATTTACATATTCAAGAAACACTCTTAGCTAATTTTAGTACATTGAAAAAATTAATTGTTAAA…	1077	706	-0.184935
PF3D7_1367700	PF3D7_1367700_e1o1-s3	GTTCAAAAAATTAATGAATATGTATTACATATAGGTGTATTTCTCAAAGGATATGTAAGCAAAAATGATAAGGTTCAAACCATTGTTGATTTTGATAGAAGAAAATTGGTTGCATGTAATCACACGGCCACACATATGCTTAATTTCATGTTGAGAAAAGTATTAACAGAAAAGTATACGAACAGTGGAAAATCATCTAAGACGCATGAAGGAAATAATGAGAAGCATGAAATGAGTGAAAATGACATCAATAGTAATAATAATTATGATAATAACAAGGAGGAAAAAGGATTTTCTATTTTTACTTGTGAACAAAAAGGTTCCTTAGTAGATGATGAAAAATTACGTTTCGATTTTTCATTTATCGAAAATATTAACATTGATGCAATTACCAAAATT…	1317	704.5	-0.18779
PF3D7_0936300	PF3D7_0936300-e2o2	TTATATCTTAATACGTTCAACTATAAATATACCACCTCATACGAAGGGAGCAGTTTCAGGCAATTATCTGAACCAGTTGTAGAAGAACAGGATTTAAAAAAAACAAATGCAGAGTCATCACATATAGAAGCAACAACTTCACAAGCAACAACTTCACAAGCAACAACTTCACAAGCAACAACTTCACAAGCAACAACTTCACAAGCAACAACTTCACAAGCAACATCTTCACAAGAATCAGATGAACAAGGACTAACGGCACCATCATTAAATTTAGAAGAAACCCAATCAAACAAAGTACGTAATAAAATTTTTAACTTCCCTATACCATCCGCAGAAGGTACAGTATCAAAAGAATTTAAAAACCAACCAAAAACTGAATATGAAAAAAAATTATTT…	900	705	-0.191053
PF3D7_0316600	PF3D7_0316600-e1o4	ATGCCACCAAATAATTCCAAATATGTTTTAGATCCAGTAAGCATAAAATCTGTTTGTGGAGGGGAAGAATCATATATTAGATGTGTTGAATATGGGAAAAAAAAAGCGCATTATAGTAATTTAAATTTATTAGCAAAAGCTATATTAGCTGGTATGTTTGTTGGACTTTGTGCACACGCTTCCGGAATAGCA	192	702.5	-0.195266
PF3D7_1230000	PF3D7_1230000-S3	TTCCCGCAGATATATTCTCTGGTGAACTACATCAAGAAGAAGAAGTCCGACAAATACGACGAGTCAAACAACAATGAAATCCACAAAAAGAAAGACATCAGCACCTCGCAGTTTTTTCATGATAGTTTGAATATCAGTAAACACGACAATGGTGTTGATCGTTCGATGTGTAATTATATTTCCAAACAGGAGGGGAAGAGTAAGTTTATCAATACGTTTACGAACGAGGCAATGGACGTTTGTAACGACTCAAACATCAAAAGAGATTACTTTAATTTGAACTTTTATCTTGATTATTATAACAAGAAAAAAAATGAGTTCTTAAACGTCGCGATTAATCACGATGAAGATAAGGAGGTAAATGACATGAGTATTCATAACAATAATAATAATATTTAC…	1563	700.5	-0.196105
PF3D7_0512600	PF3D7_0512600	ATGAATGATAGCTATGATAGTTTATTTAAAATATTGTTAATTGGAGATAGTGGTGTTGGAAAATCATGTTTGCTCCTTCGTTTTGCCGATGATACGTATACAGACAGTTATATAAGTACCATAGGAGTAGACTTTAAAATAAAAACAATAGAAATAGAAGATAAAATAATAAAATTACAAATATGGGATACGGCTGGGCAAGAAAGGTTCCGAACAATAACATCCTCATATTATAGAGGAGCCCAAGGTATAATTATTGTATATGACGTAACGGATAGGGACAGCTTTAATAACGTTAAGAATTGGATTATAGAAATTGAAAAATATGCTTCTGAAGATGTACAGAAGATATTGATAGGAAATAAGATCGATTTAAAGAATGATAGGAATGTAAGTTAT…	600	699	-0.198494
PF3D7_0414000	PF3D7_0414000_e2s1	GTTGGATTTAACGGTTCAGGGAAAAGCAATATTTTATTAGCTATCGAATTTATATTAAGTGATGTGTGTGAGTACAAGCAAATATATTTACATGAAGGTATTGGGAATGCAGTTCGCAATTGTTATGTGGAAATAATTTTTGATAATTCCGAGAAATATTTTAGTATGTTTAAAGAGAGTGAAATTAAGATAAAAAAAGTGTTAGAAAATATGAAATGTGAAATATTTGTTAATGATAAGAATATTAGTAAAAATCAATATGTGGAATTATTGGAAAGTTGTGGCTTGTGTATTAATAATTTATATAATATAATTAAACAAGGACAAATAATAAAATTAAGTAATATGAAAGATGAAGAAATATTAAACTATTTAAAAAGTATATTAGGTGCTAAAATT…	999	663	-0.199139
PF3D7_1333000	PF3D7_1333000_e6s1	GTAAAATATAATGATAAGGAGTGCTTATTAATATCAAACGAAGAGGTATTAGGGAAAATAAACGATTCAAATGAAATTAATCCATTGAATATTACACCTTTATATGACCGTGTGTTAATAAAATTGATAAATCCGAACGTTAATTCGGACTCCTTAATAATTATACCAGAATCAAAAAATAATGATAAAGTAACAGATGGACAGGTTGTAGCAATAGGTAATGGAATATATGATGAAAATAATCAAAAGGTACCTATAGACTTAAGAATAGATGATTATATTAAATTTTCACCTTTTTCAAATGAAAGTTGTGAATTTACTTACCAGAACGCTAAATATACATTTGTAAAGGCTAGATATGTCATGGCCAAATAT	375	688.5	-0.204601
PF3D7_0717500	PF3D7_0717500_e2s1	GGGTGCCCCCCTTTCAACGGGTCGAACGAATACGATATTTTAAAAAAAGTGGAAGCGGGGAAATATACATTCGATTTACCACAATTCAAAAAAATTAGTGATAAGGCAAAAGACTTAATAAAAAAAATGCTCATGTATACGAGTGCTGTTAGGATATCGGCAAGGGACGCACTAGAACATGAGTGGATAAAAATGATGACAAGCAAAGATAACTTAAATATAGATATTCCGTCCTTAGAATTGAGTATAGCAAATATCAGACAATTTCAAAGTACCCAGAAGTTAGCTCAAGCAGCTTTATTATATATGGGTTCCAAATTAACAACAATTGATGAAACAAAAGAATTAACAAAAATTTTTAAAAAGATGGATAAAAATGGTGATGGTCAATTAGATAGA…	789	644.5	-0.204967
PF3D7_1409400	PF3D7_1409400-e2o4	TATCAAGGTTTATTAAACAGTAAAGATCGTGAAGATGAAAGTAATGGAGCTCATTTAGCTGAGAAGGTTGAAAAGGGGGGAGAGCAAATTGAAAATACTTTAATGAAATTAAATGTAAGATATCAAACATTATTCTTTTCATCTGGTGTTATGACCGTTTTTTGTGGTACTATATCATTATTAGAATCCTTGAGATATTTTTATTTTACTAATTTTGTAGTGTCTACATTTTTA	234	688	-0.205469
PF3D7_1426700	PF3D7_1426700_e1s2	ATGTGTACCAACGCTTCTGATATTTTATTAGTTGAAGTATTTCAAAAGGAAATGAAAAAAGGTACACAAAGAAAAACACAACGGGTTGTACCATTATTAGAAACAATTCAATCATTACAAAACTCATCTATTATATTAGAAAATTTATTAAAAAATCCATGGTATCGTAAACATTTAACAACAAATTTTGAAGATAAACAAGAAATTATGATTGGTTATTCAGATTCTGGAAAAGATGGTGGAAGATTAACATCTGCTTGGGAATTATTTAAAGCACAAGAAAAACTTGTACATATAGGTAAAAAATATTCAGTAGAAATACGTTTCTTTCATGGTCGAGGAGGAAGTGTAAGTAGAGGTGGTGGACCTCAACATTTAGCCATATTATCTCAACCTATT…	1746	697	-0.206933
PF3D7_1206100	PF3D7_1206100_e6s1	AAATGTAACGAAGAAGCTACCTTATATTCAGTACCTGAAAATGAGTGGAGACATTATAAAAAGTTTGTTGATTATGACACTGTTCAGGAAATATTAAATATATCGGAGAAATGTTTAGAAAAGGTTATAAAAGACTTTGGCTTATGTGCACAAATTCAAAGAAAAGAAAAATCAATTGGTTTGGTTCCTAATAAAATACCGTCTTTAAATATTAAAAATGAA	222	640	-0.211403
PF3D7_0919600	PF3D7_0919600	ATGAAAATAAAAATTAAAAATTTCCTTTTTGTTTGCTTTTTGCTTTTTTTCTTAATTCTTTCATTTAGATATTCATGTGAGAAAAAAAAGCTACAGACTGTTGATTATAAAAAAAAATCGATTACAGGAAGAATTAAAAACAAGATCCAGAAATATAAGGAAAAAAAATTGATATTAATAACAGATATAACAAATATAAATGAAAGATATTCATCGTTTTTACATATATTAAATACAGAAGGAAATTATATAAGTAAAATTATAAATATATTATCACCTGATGATATTCATAAAATTAATTATTGTTTATATGATGGATTAATTATAATATTAGATATATTAAATGATAAAATTGTTGAAATATTAAAAGCTAGCTATTTGAAATTATTTATAGACAAA…	1431	692.5	-0.212707
PF3D7_1325200	PF3D7_1325200_e3s1	GTTAATCCCGGAGATGTACAAGGATTTGTGATAGGAGCTCATGGAGATAAGATGGTCCCCCTTCCAAGATATTGTTGCGTTAACGGCATACCATTAAGTGACTTTACAAAAAAAGGTGCCATTACCGAAAAAGAAATAAATCAAATAGTTGAAAAGACAAGAAACACGGGCTTTGAATTATTAGAATTGTTACCAGAAGGCTCAGTATGTTTTGCTCCTTCTCTCGCTATTGTCGAAATTATAGAAGCTTATCTAAAAGATTTAAAAAGAGTTCTTGTTTGTTCAGTTTTGCTAAATGGTCATTATGGACACAAAGGAGTTTTTGCCGGTATACCTGTAGTTATAGGAGGAAAGGGTATTGAAAAAATAATAGAACTTGATTTAAATACACAAGAAAAA…	489	684.5	-0.215611
PF3D7_0305300	PF3D7_0305300-S1	ATGATGGATGTTTACAAAGAGGAAAACTCGGACCTGCTAAACCACCAAGAGGAGGAAATCTCCCGTAACAGCAACATCAATGATGAATTCAGCGAAACCCAGCTGAGGGATAATGTGTACGAGGAGCGCGAAAACGAGTACATAAATAAACACAATATGATGGATGACATCCAGATTATGGTCGACGAGCAGGACAACAACAACAACTACGATAATAATAATTATTACGATGACAACATTAATAACTATGACAATAACAATTATGATGACAATAATTATGACGATAACAACTATGATAATAACAACAACAACTCGTACTACGAGTATAACCAGAACGCATACGAAGATAACGAACCGTATAACGATTACAATGATAACAACAACAATATTATCAACGGC…	1500	687.5	-0.224376
PF3D7_0703800	PF3D7_0703800	ATGGCCATAAAAAAAAAAAAGAAAGAAACAAAATCCAAAGATAATAATAATGATAATCTTAGAAATGAAAAAAAATCAACAAACTTAGAAAATGGGAAATACGATAAAAAGAAAGTAGAAATATACGAACATGGAATAGGTGGTATCACACAAAATAAGAATGATAATAATAAAGAGAATGCTTATGATGATGATATTTATCATGATAAATCAGAACACATAAATGTTAAATATTTAAATGAAAAAGATTATGAGATTGAAAAAGTGTCTAAACGAATTTATGAAGAAAATAGTAAAATAAAAAAAATTTCTTTACATCATAAAATATTAAAAGAAGAACTTGAAACAAAACAATTAATTGAACAAAATGACAAAAAGAAAAAAAATTCATTAGATTAT…	3174	687	-0.225889
[truncated: 16 more rows]

## Sheet: Key
[GeneID]	Gene ID
[truncated: 5 more rows]
