# Supplementary material for: Target-agnostic identification of human antibodies to Plasmodium falciparum sexual forms reveals cross-stage recognition of glutamate-rich repeats
Source: eLife. 2025 Jan 16;13:RP97865. doi: 10.7554/eLife.97865 (PMC11737873; doi:10.7554/eLife.97865)
Supplement: Supplementary file 2. [file elife-97865-supp2.xlsx]

## Sheet: Produced mAbs
		Variable part sequence
B1C3L	B1C3H	CAGGTGCAGCTGCAGGAGTCGGGCCCAGGACTGGTGAAGCCTTCgGAGACCCTGTCCCTCACCTGCACTGTCTCTGGTGGCTCCATCAGTAGTTACTACTGGAGCTGGATCCGGCAGCCCGCCGGGAAGGGACTGGAGTGGATTGGGCGTATCTATACCAGTGGGAGCACCAACTACAACCCCTCCCTCAAGAGTCGAGTCACCATGTCAGTAGACACGTCCaAGAACCAGTTCTCCCTGAAGCTGAGCTCTGTGACCGCCGCGGACACGGCCGTGTATTACTGTGCGAGAGTCCCAATAGCAGCAGCTGGGACTGGGGCGGACTGGTTCGACCCCTGGGGCCAGGGAACCCTGGTCACCGTCTCCTCA
	B1C3L	CAGTCTGTGCTGACTCAGCCTGTCTCCGTGTCTGGGTCTCCTGGACAGTCGGTCACCATCTCCTGCACTGGAACCAGCGGTGACGTTGGTGGTTATAACTATGTCTCCTGGTACCTCCAGCACCCAGGCAAAGTCCCCAAACTCATAATATTCGATGTCAGTTATCGGCCCTCAGGGATTTCTAATCGCTTCTCTGGCTCCAAGTCTGGCAACACGGCCTCCCTGACCATCTCTCGGCTCCAGGCTGAGGACGAGGGTACTTATTACTGCAGTTCATATACATACATCAGCACAATGATCTTCGGCGGAGGGACCAAGCTGACCGTCCTAG
B1C5K	B1C5H	CAGGTGCagCTGGTGCAGTCTGGGGCTGAGGTGAAGAAGATTGGGGCCTCAGTGAAGGTCTCCTGCAAGGCTTCTGGATACACCTTCACCAGTCATGATATCATCTGGGTGCGACAGGccGCTGGACAAGGGCTTGAGTGGATGGGATGGATGAACCCAAACACTGGTAAAAAAgGCTATGTAGAGAAGTTCCAGGGCAGAGTCACCTTGACCAggAACATGTCCACAGGCACAGCCTACATGGAGTTGAGCAGCTTGAGATCTGACgACACGGCCGTTTATTACTGTGCGAGAGGCGTTGGAACGTACCATGGTTCGGAGGgATGGCTCGACCCCTGGGGCCAGGGAACCCTGATCACCGTCTCCTCA
	B1C5K	GACATCCAGATGACCCAGTCTCCTTCCACGCTGGCTGCATCTGTCGGAGACAGAGTCACCATCACTTGCCGGGCCAGTCAGAGTATCAATACCTGGCTGGCCTGGTATCAACACCAAcCCGGGaAAGCCCCTAGACTCCTGATCTATAAGGCGTCTAGTTTAGAAAGTGGGGTCCCTTCAAGATTCAGCGGCAGTGGATCTGGGACAGAATTCACTCTCACCATCAGCGGCCTGCAGCCTGATGATTTTGCAACTTATTACTGCCAACAATATAGTGATTATTCTCGGACTTTTGGCCAGGGGACCAAGCTGGAGATCAAA
B1C5L	B1C5H	CAGGTGCagCTGGTGCAGTCTGGGGCTGAGGTGAAGAAGATTGGGGCCTCAGTGAAGGTCTCCTGCAAGGCTTCTGGATACACCTTCACCAGTCATGATATCATCTGGGTGCGACAGGccGCTGGACAAGGGCTTGAGTGGATGGGATGGATGAACCCAAACACTGGTAAAAAAgGCTATGTAGAGAAGTTCCAGGGCAGAGTCACCTTGACCAggAACATGTCCACAGGCACAGCCTACATGGAGTTGAGCAGCTTGAGATCTGACgACACGGCCGTTTATTACTGTGCGAGAGGCGTTGGAACGTACCATGGTTCGGAGGgATGGCTCGACCCCTGGGGCCAGGGAACCCTGATCACCGTCTCCTCA
	B1C5L	CAGTCTGTGCTGACTCAGCCACCCTCAGCGTCTGAGACCCCCGGGCAGAGGGTCACCATCTCTTGTTCTGGAAGCAGCTCCAACGTCGGAAGTAATTCTGTAAACTGGTACCAGCAGGTCCCGGGAACGGCCCCCAAACTCCTCATCTATAATACCAATCAACGGCCCTCAGGGGTCCCTGCCCGATTCTCTGGCTCCAAGTCTGGCACCTCAGCCTCCCTGGCCATCAGTGGGCTCCACTCTGAGGATGAGGCTGATTATTACTGTGCAACATGGGATGGCAGCCTGAAGAAGGGAGTGTTCGGCGGAGGGACCAAGGTGACCGTCCTA
B1C8K	B1C8H	GAGGTGCAGCTGGTGGAGTCGGGCCCAGGACTGGTGAAGCCTTCAGAGACCCTGTCCCTCACGTGCACTGTGACTGGTGACTCCATCATCAACGACAGTTTATTCTGGACCTGGGTCCGGCAGCCCGCCGGGAAGGGACTGGAGTGGATTGGGCGTGTCAATCATTATGGCGGTACCAACTCCAACCCCTCCCTCAGGAGTCGACTCACCATGTCAGCAGACACGTCCAAGAATCAGTTGTCCCTGATGTTGTTCTCTGTGACCGCCGCCGACACGGCCATTTATTATTGTGCGAGAGATTATCCCCCCCGGGGGTTCGGCCCCTGGGGCCCGGGAGTCCTGGTCACCGTCTCCGCAG
	B1C8K	GAAATAGTGATGACGCAGTCTCCAGCCACTCTGTCTGTGTCTCCGGGGGAAAGAGCCACCCTCTCCTGCAGGGCCAGTCAGAGTATTAGCAACAACTTAGCGTGGTACCAGCAAAAACCTGGCCAGGCTCCCAGGCTCCTCATCTATGGTGCATCCACCAGGGCCACTGGTATCCCAGCCAGGTTCAGTGGCAGTGGGTCTGAGACAGACTTCACTCTCACCATCAGCAGCCTGGAGTCTGAAGATTTTGCAGTTTATTACTGTCAGCAGTATAATAAGTGGCCTCCTTGGACGTTCGGCCAAGGGACCAAGGTGGAAA
B1C8L	B1C8H	GAGGTGCAGCTGGTGGAGTCGGGCCCAGGACTGGTGAAGCCTTCAGAGACCCTGTCCCTCACGTGCACTGTGACTGGTGACTCCATCATCAACGACAGTTTATTCTGGACCTGGGTCCGGCAGCCCGCCGGGAAGGGACTGGAGTGGATTGGGCGTGTCAATCATTATGGCGGTACCAACTCCAACCCCTCCCTCAGGAGTCGACTCACCATGTCAGCAGACACGTCCAAGAATCAGTTGTCCCTGATGTTGTTCTCTGTGACCGCCGCCGACACGGCCATTTATTATTGTGCGAGAGATTATCCCCCCCGGGGGTTCGGCCCCTGGGGCCCGGGAGTCCTGGTCACCGTCTCCGCAG
	B1C8L	CAGTCTGTGTTGACGCAGCCGCCCTCAGTGTCTGCGGCCCCAGGACAGAGGGTCACTATCTCCTGCTCTGGAAGCAGCTCCAACCTTGGCAGAAATTCTATGGGGTGGTACCAGCATTTCCCAGGAACAGCCCCCAACCTCATCGTCTATCAAAATAGTGAACGATCCGCAGGCGTTCCTGACCGATTCTCTGCCTCCAAGTTTGGCGCGTCAGCCACCCTGGTCATCGCCGGACTCCAGCCCGGGGACGAGGCCGACTATTACTGCGCATCATGGGATAGTAGTCTCCATAGTGTGGTTTTCGGCGGGGGGACCAAGGTGACCGTCCTG
B1D3K	B1D3H	CAGGTTCAGCTGGTGCAGTCTGGCGCTGAGGTGAAGAAGCCTGGGGCCTCAGTGAAGGTCTCCTGCAAGACTTCTGGTTACACCTTTAACAACTTTGCTATCAGCTGGGTGCGACAGGCCCCTGGACAAGGGCTTCAATGGGTGGGATGGGTCAGCCCTTACACTGGTAATACAAACTATGCACAGCAGTTCGAGGGCAGAGTCACCATGACCACAGACAGATACACGAACACAGCCTACATGGAGCTGAGGAGACTGAGATTTGACGACACGGCCGTCTACTTCTGTGCGAGAGGAGTTCTCGCACTGCCATCAGCCCGACGGGGATACTTTCACTATTACATGGACATTTGGGGAAGAGGGACCACGGTCACCGTCTCCTCA
	B1D3K	GATATTGTGATGACCCAGACTCCACTCTCTCTGTCCGTCACCCCTGGACAGCCGGCCTCCATCTCCTGCAAGTCTAGTCAGAGCCTCCTCCATAGTGATGAAAAGACCTATTTGTATTGGTACCTGCAGAAGCCAGGCCAGGCTCCACAGCTCCTGATCTATGAGGTTTCCAACCGGTTCTCTGGAGTGCCAGATAGGTTCAGTGGCAGCGGGTCACGGACAGATTTCACACTGAAAATCAGCCGGGTGGAGGCTGAGGATGTTGGCGTTTATTACTGCATGCAAAGTATACAACTTCCTCCGACGTTCGGCCAAGGGACCAAGGTGGAGATCAAA
B1D3L	B1D3H	CAGGTTCAGCTGGTGCAGTCTGGCGCTGAGGTGAAGAAGCCTGGGGCCTCAGTGAAGGTCTCCTGCAAGACTTCTGGTTACACCTTTAACAACTTTGCTATCAGCTGGGTGCGACAGGCCCCTGGACAAGGGCTTCAATGGGTGGGATGGGTCAGCCCTTACACTGGTAATACAAACTATGCACAGCAGTTCGAGGGCAGAGTCACCATGACCACAGACAGATACACGAACACAGCCTACATGGAGCTGAGGAGACTGAGATTTGACGACACGGCCGTCTACTTCTGTGCGAGAGGAGTTCTCGCACTGCCATCAGCCCGACGGGGATACTTTCACTATTACATGGACATTTGGGGAAGAGGGACCACGGTCACCGTCTCCTCA
	B1D3L	CAGTCTGTGCTGACTCAGCCACCCTCAGCGTCTGGGACCCCCGGGCAGAGGGTCACCATCTCTTGTTCTGGAAGCAGCTCCAACATCGGAAGTAATTATGTATACTGGTACCAGCAGCTCCCAGGAACGGCCCCCAAACTCCTCATCTATAGGAATAATCAGCGGCCCTCAGGGGTCCCTGACCGATTCTCTGGCTCCAAGTCTGGCACCTCAGCCTCCCTGGCCATCAGTGGGCTCCGGTCCGAGGATGAGGCTGATTATTACTGTGCAGCATGGGATGACAGCCTGAGTGGGGTGTTCGGCGGAGGGACCAAGCTGACCGTCCTA
B1E7K	B1E7H	CAGGTGCAGCTGGTGGAGTCTGGGGGAGGCGTGGTCCAGCCAGGGAGGTCCCTGAGACTCTCCTGTGCAGCGTCTAGATTCACCTTCAGTGAATATGGCATGAACTGGGTCCGCCAGGCTCCAGGCAAGGGGCTGGAGTGgGTGGCAGtTATATGGCATGATGGAAGTATAAAATATTATGCAGACTCCGTGAAGGGCCGATTCACCATCTCCAGAGACAATTCCAAGAATACGCTGTATCTGCAACTGAAAAGCCTGAGAGCCGAGGACACGGCTATGTATTACTGTGCGAGAGGGGGATATAGTGACTACGATAGGCCGGGATATTACTTTGACTCCTGGGGCCAGGGAACCCTGGTCACCGTCTCCTCA
	B1E7K	GAAATTGTGTTGACACAGTCTCCAGCCaCCCTGTCTTTGTCTCCAGGGGAAAGAGCCACCCTCTCCTGCAGGGCCAGTCAGAGTATTAGCAACTACTTAGCCTGGTACCAACAGAAACCTGGCCAGGCTCCCAGGCTCCTCATCTATGATGCATCCAACAGGGCCACTGGCATTCCAGCCAGGTTCAGTGgCaGTGGGTCTGGGACAGACTTCACTCTCACCATCAGCAGCCTAGAGCCAGAAGATTTTGCACTTTATTACTGTCAGCAGGGTAGCAAGTGGCCTGTGTGCAGTTTTGGCCAGGGGACCAAGCTGGAGATCAAA
B1F9K	B1F9H	CAGGTGCAGCTGGTGGAGTCGGGCCCAGGACTGGTGAAGCCTTCGGAGACCCTGTCCCTCACCTGCACTGTCTCTGGTGGCTCCATCAGTAGTTACACTGGAGCTGGATCCGGCAGCCCGCCGGGAAGGGACTGGAGTGGATTGGGCGTATCTATAGCAGTGGGAGCACCAACTACAACCCCTCCCTCAAAGTCGAGTCACCATGTCAGTAGACACGTCCAAGAACCAGTTCTCCCTGAAGCTGAGCTCTGTGACCGCCGCGGACACGGCCGTGTATTACTGTGCGAGGGAGCAGTGGCTGGTACAATGGTGGTACTTCGATCTCTGGGGCCGTGGCACCCTGGTCACTGTCTCCTCAG
	B1F9K	GACATCCAGATGACCCAGTCTCCATCTTCCGTGTCTGCATCTGTAGGAGACAGAGTCACCATCACTTGTCGGGCGAGTCAGGGTATTAGCAGCTGGTTAGCCTGGTATCAGCAGAAACCAGGGAAAGCCCCTAAGCTCCTGATCTATGCTGCATCCAGTTTGCAAAGTGGGGTCCCATCAAGGTTCAGCGGCAGTGGATCTGGGACAGATTTCACTCTCACCATCAGCAGCCTGCAGCCTGAAGATTTTGCAACTTACTATTGTCAACAGGCTAACAGTTTCCCTCGGACTTTCGGCCCTGGGACCAAAGTGGATATCAAA
B2C10L	B2C10H	CAGGTGCAGCTGGTGCAGTCTGCGTCTGATGTGAAGAAGCCTGGGGCCTCAGTGCGGGTCTCCTGCAAGGCTTCTGAATACACCCTCACCGACTACTATATGCACTGGATACGACAGGCCCCTGGACAAGGGCTTGAGTGGATGGGATGGATCGATCCTAAGAGTGGTGGCACAAGCTATGCACAGAAGTTTCAGGGCAGGTTCACCATGACCAGGGACACGTCCATCAACACAGCCTACATGGAGCTGAGCAGACTGACATCTGAAGACACGGCCGTCTATTACTGTGCGAGAGAAAGAATACAAAATTGTTTCGATCCCTGGGGCCAGGGAACCCTGGTCACCGTCTCCTCA
	B2C10L	CAGTCTGCCCTGACTCAgcCTCGCTCAGTGTCCGGGTCTCCTGGACagTCAgTCTCCATCTCCTGCACTGGAACCAGcaGTgATGTTGgTGCTTATAaCTCTGTCTCctGGTACCAACAGCACCCagGCAAAGCCCCCAAACTCATGATTTATGATGTCAATAATCGGCCCTCAGGGGTCCCTGATCGCTTCTCTGGCCCCAAGTCTGGCAACACGGCCTCCCTGACCATCTCTGGACTCCAGGCTGAAGATGAGGCTGATTATTACTGCTGCTCATTTGCAGACAGTTACAATGTCTTCGGAACTGGGACCACGGTCACCGTCCTAC
B2D10L	B2D10H	CAGGTGCAGCTACAGCAGTGGGGCACAGGGCTGTTGAAGCCTTCGGAGTCCCTGTTCCTCACCTGCGCTGTCTATAATGAGGACTTGAGTGCTTTCTCCTGGAGTTGGATCCGCCAGTCCCCCGGTAAGGGGCTGGAGTGgATTGGCGAAATCGATCATCTTCaaaACGTCAATTACAATCCGTCCCTCAAGGGTCGGTTCACCATATCAATTGACACGTCCAAGAaTCAGTTCTCCCTGAGGTTCTTCTCTGTGACCGCCGCGGACGCGGCTATGTATTACTGTGCGAGGGGAGGCCGCAAAGTTTATCACCCTTATTGGACTGGCTATGTGAACAATTGCTTTGACCCCTGgGGCCAggGAACCCTGGTCACCGtCTCCTCA
	B2D10L	GAGGTGCAGCTGGTGGAGTCGGGCCCAGGACTGGTGAAGCCTTCACAGACCCTGTCCCTCACCTGCACTGTCTCTGGTGGCTCCATCAGCAGTGGTGGTTACTACTGGAGCTGGATCCGCCAGCACCCAGGGAAGGGCCTGGAGTGGATTGGCCACATTTATTACAGTGGGAGCACCTACTACAACCCGTCCCTCAGGAGTCGAGTTACCATGTCAGTGGAGACGTCTAAGAACCAGTTCTCCCTGAAACTAAGCTCTATGACTGCCGCGGACACGGCCGTGTATTACTGTGCGAGAGGTAATCGGGGAGTCACAATCTATTACTATGACTTCTGGGGCCAGGGAACCCTGGCCACCGTCTCCTCAG
B2E9L	B2E9H	GAGGTGCAGCTGGTGGAGTCTGGGGGAGGCGTGGTCCAGCCTGGGACGTCCCTGAGACTCTCCTGTGCAGCGTCTGGATTCACCTTCAGTACCTATGGCATGCACTGGGTCCGCCAGGCTCCAGGCAAGGGGCTGGAGTGGGTGGCAGTTATATGGCATGATGGAAGTAATAAATACTATGCAGACTCCGTGAAGGGCCGATTCACCATGTCCAGAGACAATTCCAAGAACACACTGTATCTTCAAATGAACAGCCTGAGAGCCGATGACTCGGCTGTATATTACTGTGCGAGGCCCTCCTACCATGGTTCGGGGAGTTATGGGGGGGGATTTGACTACTGGGGCCAGGGAACCCTGGTCACCGTCTCTTCA
	B2E9L	CAGTCTGTGCTGACGCAGCCGCCCTCAGTGTCTGCGGCCCCAGGACAGAAGGTCACCATCTCCTGCTCTGGAAGCAGCTCCAACATTGGGAGGAACTTTGTATCCTGGTACCAACAACTCCCAGGAACAGCCCCCAGACTCCTCATCTATGAAAATGATAAGCGACCCTCAGGGATTCCTGACCGATTCTCTGGCTCCCAGTCTGGCACGTCAGCCACCCTGGGCATCACCGGACTCCAGACTGGGGACGAGGCCGATTATTACTGCGGAACATGGGATCGCAGTCTGAGTGTTGTATTCGGCGGAGGGACCAAGCTGACCGTCTTAA
B2F7L	B2F7H	CAGGTGCAGATGGAACAGTCCGGGGGAGGCTTGGTTCGGCCTGGGGGGTCCCTGAGACTCTCCTGTACAGGCTCTGGATTCACCTTCAGTAAATTCTGGCTGCACTGGGTCCGCCAAGTTCCAGGGAAGGGCCTGGATTGGGTCACACGTATTAAAGGTGATGGGAGCGAGAGAGTCTACGCGGCCTCTGTGAAGGGCCGATTCACCATCTCCAGAGACAACGCCAAGAAGACCCTGTCTCTGCAAATGAGGAGTCTGAGACTCGAGGACACGGGTGTCTATTACTGTGCAGCGCGGAATGGGTCACATGACTTCTGGGGCCAGGGAACCCTGGTCACCGTGTCGTCAG
	B2F7L	CAGTCTGTCCTGACTCAGCCTCCCTCCGCGTCCGGGTCTGTTGGACAGTCAGTCACCATCTCCTGCACTGGAACCAGCAGTGACGTTGGTGGCTATAACTATGTCTCCTGGTACCAACAATACCCAGGCAAAGCCCCCAAACTCATTATTTATGAGGTCACTAAGAGGCCCTCAGGTATCCCTGATCGCTTCTCTGGCTCCAAGTCTGGCAACACGGCCTCCCTGACCGTCTCTGGGCTCCAGGCTGAGGATGAGGCTGATTATTATTGCAGCTCATATGCAGGCAACAACGATGAGGATTATGTCTTCGGAACTGGGACCAAGGTCACCGTCGTAC
B1E11K	B1E11H	GAGGTGCAGCTGGTGGAGTCTGGGGGAGGCCTGGTCCAGCCTGGGGGGTCCCTGAGACTCACCTGTGCGACCTCTGGATTCACTTTTGGTAGTTATTGGATGACCTGGGTCCGCCAGGCTCGAGAGAAGGGGCTGGAGTGGGTGGCCAATATAAGACACGATGGCAGTGAAACATACTATGTGGACTCTGTGAAGGGCCGATTCACCATCTCCAGAGACAACGCCAACAACTCACTGTTTCTGCAAATGAACAACCTGAGAGCCGAAGACACGGCTATGTACTACTGTGCGCGAGGTTCGGGGGGTTTGGTCCACTGGGGCCACGGAACCCTGGTCACCGTCTCCTCA
	B1E11K	GAAATTGTGTTGACGCAGTCTCCAGGCACCCTGTCTTTGTCTTCAGGGGCAAGAGCCACCCTCTCCTGCAGGGCCAGTCGGACTTTCACCGACACCTACTTGGCCTGGTACCAGCACAAACCTGGCCAGACTCCCAAGCTCCTCATCCATGGTGCATCCAGCAGGGCCCCTGGCATCCCAGACAGGTTCAGTGGCAGTGTGTCTGGGACAGACTTCGTTCTCACCATCAGCAGACTGGAGCCTGAAGATTTTGCAATATATTACTGTCAGCAATATGGTCGCTCACCGCGCAGCTTTGGCCAGGGGACTAGACTGGAGATCAAA

## Sheet: Sheet1
		V	D	J		Variable part sequence
	B1C3H	Homsap IGHV4-4*07 F, or Homsap IGHV4-4*12 F	Homsap IGHD6-13*01 F	Homsap IGHJ5*02 F		CAGGTGCAGCTGCAGGAGTCGGGCCCAGGACTGGTGAAGCCTTCgGAGACCCTGTCCCTCACCTGCACTGTCTCTGGTGGCTCCATCAGTAGTTACTACTGGAGCTGGATCCGGCAGCCCGCCGGGAAGGGACTGGAGTGGATTGGGCGTATCTATACCAGTGGGAGCACCAACTACAACCCCTCCCTCAAGAGTCGAGTCACCATGTCAGTAGACACGTCCaAGAACCAGTTCTCCCTGAAGCTGAGCTCTGTGACCGCCGCGGACACGGCCGTGTATTACTGTGCGAGAGTCCCAATAGCAGCAGCTGGGACTGGGGCGGACTGGTTCGACCCCTGGGGCCAGGGAACCCTGGTCACCGTCTCCTCA
1	B1C3L					séquence super courte, need to re-send to seq!!
	B1C5H	Homsap IGHV1-8*01 F	Homsap IGHD3-10*01 F	Homsap IGHJ5*02 F		CAGGTGCagCTGGTGCAGTCTGGGGCTGAGGTGAAGAAGATTGGGGCCTCAGTGAAGGTCTCCTGCAAGGCTTCTGGATACACCTTCACCAGTCATGATATCATCTGGGTGCGACAGGccGCTGGACAAGGGCTTGAGTGGATGGGATGGATGAACCCAAACACTGGTAAAAAAgGCTATGTAGAGAAGTTCCAGGGCAGAGTCACCTTGACCAggAACATGTCCACAGGCACAGCCTACATGGAGTTGAGCAGCTTGAGATCTGACgACACGGCCGTTTATTACTGTGCGAGAGGCGTTGGAACGTACCATGGTTCGGAGGgATGGCTCGACCCCTGGGGCCAGGGAACCCTGATCACCGTCTCCTCA
2	B1C5K	Homsap IGKV1-5*03 F, or Homsap IGKV1-5*05 F		Homsap IGKJ2*02 (F)		GACATCCAGATGACCCAGTCTCCTTCCACGCTGGCTGCATCTGTCGGAGACAGAGTCACCATCACTTGCCGGGCCAGTCAGAGTATCAATACCTGGCTGGCCTGGTATCAACACCAAcCCGGGaAAGCCCCTAGACTCCTGATCTATAAGGCGTCTAGTTTAGAAAGTGGGGTCCCTTCAAGATTCAGCGGCAGTGGATCTGGGACAGAATTCACTCTCACCATCAGCGGCCTGCAGCCTGATGATTTTGCAACTTATTACTGCCAACAATATAGTGATTATTCTCGGACTTTTGGCCAGGGGACCAAGCTGGAGATCAAA
3	B1C5L	Homsap IGLV1-44*01 F		Homsap IGLJ3*02 F		CAGTCTGTGCTGACTCAGCCACCCTCAGCGTCTGAGACCCCCGGGCAGAGGGTCACCATCTCTTGTTCTGGAAGCAGCTCCAACGTCGGAAGTAATTCTGTAAACTGGTACCAGCAGGTCCCGGGAACGGCCCCCAAACTCCTCATCTATAATACCAATCAACGGCCCTCAGGGGTCCCTGCCCGATTCTCTGGCTCCAAGTCTGGCACCTCAGCCTCCCTGGCCATCAGTGGGCTCCACTCTGAGGATGAGGCTGATTATTACTGTGCAACATGGGATGGCAGCCTGAAGAAGGGAGTGTTCGGCGGAGGGACCAAGGTGACCGTCCTA
	B1C8H					IMGT no results
4	B1C8K	Homsap IGKV3-15*01 F		Homsap IGKJ1*01 F		GAAATAGTGATGACGCAGTCTCCAGCCACTCTGTCTGTGTCTCCGGGGGAAAGAGCCACCCTCTCCTGCAGGGCCAGTCAGAGTATTAGCAACAACTTAGCGTGGTACCAGCAAAAACCTGGCCAGGCTCCCAGGCTCCTCATCTATGGTGCATCCACCAGGGCCACTGGTATCCCAGCCAGGTTCAGTGGCAGTGGGTCTGAGACAGACTTCACTCTCACCATCAGCAGCCTGGAGTCTGAAGATTTTGCAGTTTATTACTGTCAGCAGTATAATAAGTGGCCTCCTTGGACGTTCGGCCAAGGGACCAAGGTGGAAA
5	B1C8L	Homsap IGLV1-51*02 F		Homsap IGLJ2*01 F, or Homsap IGLJ3*01 F (see comment)		CAGTCTGTGTTGACGCAGCCGCCCTCAGTGTCTGCGGCCCCAGGACAGAGGGTCACTATCTCCTGCTCTGGAAGCAGCTCCAACCTTGGCAGAAATTCTATGGGGTGGTACCAGCATTTCCCAGGAACAGCCCCCAACCTCATCGTCTATCAAAATAGTGAACGATCCGCAGGCGTTCCTGACCGATTCTCTGCCTCCAAGTTTGGCGCGTCAGCCACCCTGGTCATCGCCGGACTCCAGCCCGGGGACGAGGCCGACTATTACTGCGCATCATGGGATAGTAGTCTCCATAGTGTGGTTTTCGGCGGGGGGACCAAGGTGACCGTCCTG
	B1D3H	Homsap IGHV1-18*01 F	Homsap IGHD3-9*01 F	Homsap IGHJ6*03 F		CAGGTTCAGCTGGTGCAGTCTGGCGCTGAGGTGAAGAAGCCTGGGGCCTCAGTGAAGGTCTCCTGCAAGACTTCTGGTTACACCTTTAACAACTTTGCTATCAGCTGGGTGCGACAGGCCCCTGGACAAGGGCTTCAATGGGTGGGATGGGTCAGCCCTTACACTGGTAATACAAACTATGCACAGCAGTTCGAGGGCAGAGTCACCATGACCACAGACAGATACACGAACACAGCCTACATGGAGCTGAGGAGACTGAGATTTGACGACACGGCCGTCTACTTCTGTGCGAGAGGAGTTCTCGCACTGCCATCAGCCCGACGGGGATACTTTCACTATTACATGGACATTTGGGGAAGAGGGACCACGGTCACCGTCTCCTCA
6	B1D3K					no results in IMGT (very short sequence)
7	B1D3L	Homsap IGLV1-47*01 F		Homsap IGLJ3*02 F		CAGTCTGTGCTGACTCAGCCACCCTCAGCGTCTGGGACCCCCGGGCAGAGGGTCACCATCTCTTGTTCTGGAAGCAGCTCCAACATCGGAAGTAATTATGTATACTGGTACCAGCAGCTCCCAGGAACGGCCCCCAAACTCCTCATCTATAGGAATAATCAGCGGCCCTCAGGGGTCCCTGACCGATTCTCTGGCTCCAAGTCTGGCACCTCAGCCTCCCTGGCCATCAGTGGGCTCCGGTCCGAGGATGAGGCTGATTATTACTGTGCAGCATGGGATGACAGCCTGAGTGGGGTGTTCGGCGGAGGGACCAAGCTGACCGTCCTA
	B1E7H	Homsap IGHV3-33*01 F	Homsap IGHD5-12*01 F	Homsap IGHJ4*02 F (see comment)		CAGGTGCAGCTGGTGGAGTCTGGGGGAGGCGTGGTCCAGCCAGGGAGGTCCCTGAGACTCTCCTGTGCAGCGTCTAGATTCACCTTCAGTGAATATGGCATGAACTGGGTCCGCCAGGCTCCAGGCAAGGGGCTGGAGTGgGTGGCAGtTATATGGCATGATGGAAGTATAAAATATTATGCAGACTCCGTGAAGGGCCGATTCACCATCTCCAGAGACAATTCCAAGAATACGCTGTATCTGCAACTGAAAAGCCTGAGAGCCGAGGACACGGCTATGTATTACTGTGCGAGAGGGGGATATAGTGACTACGATAGGCCGGGATATTACTTTGACTCCTGGGGCCAGGGAACCCTGGTCACCGTCTCCTCA
8	B1E7K	Homsap IGKV3-11*01 F		Homsap IGKJ2*04 F		GAAATTGTGTTGACACAGTCTCCAGCCaCCCTGTCTTTGTCTCCAGGGGAAAGAGCCACCCTCTCCTGCAGGGCCAGTCAGAGTATTAGCAACTACTTAGCCTGGTACCAACAGAAACCTGGCCAGGCTCCCAGGCTCCTCATCTATGATGCATCCAACAGGGCCACTGGCATTCCAGCCAGGTTCAGTGgCaGTGGGTCTGGGACAGACTTCACTCTCACCATCAGCAGCCTAGAGCCAGAAGATTTTGCACTTTATTACTGTCAGCAGGGTAGCAAGTGGCCTGTGTGCAGTTTTGGCCAGGGGACCAAGCTGGAGATCAAA
	B1F9H					no results in IMGT
9	B1F9K	Homsap IGKV1-12*01 F		Homsap IGKJ3*01 F		GACATCCAGATGACCCAGTCTCCATCTTCCGTGTCTGCATCTGTAGGAGACAGAGTCACCATCACTTGTCGGGCGAGTCAGGGTATTAGCAGCTGGTTAGCCTGGTATCAGCAGAAACCAGGGAAAGCCCCTAAGCTCCTGATCTATGCTGCATCCAGTTTGCAAAGTGGGGTCCCATCAAGGTTCAGCGGCAGTGGATCTGGGACAGATTTCACTCTCACCATCAGCAGCCTGCAGCCTGAAGATTTTGCAACTTACTATTGTCAACAGGCTAACAGTTTCCCTCGGACTTTCGGCCCTGGGACCAAAGTGGATATCAAA
	B2C10H	Homsap IGHV1-2*02 F	Homsap IGHD4-11*01 ORF	Homsap IGHJ5*02 F		CAGGTGCAGCTGGTGCAGTCTGCGTCTGATGTGAAGAAGCCTGGGGCCTCAGTGCGGGTCTCCTGCAAGGCTTCTGAATACACCCTCACCGACTACTATATGCACTGGATACGACAGGCCCCTGGACAAGGGCTTGAGTGGATGGGATGGATCGATCCTAAGAGTGGTGGCACAAGCTATGCACAGAAGTTTCAGGGCAGGTTCACCATGACCAGGGACACGTCCATCAACACAGCCTACATGGAGCTGAGCAGACTGACATCTGAAGACACGGCCGTCTATTACTGTGCGAGAGAAAGAATACAAAATTGTTTCGATCCCTGGGGCCAGGGAACCCTGGTCACCGTCTCCTCA
10	B2C10L	Homsap IGLV2-11*01 F		Homsap IGLJ1*01 F		CAGTCTGCCCTGACTCAgcCTCGCTCAGTGTCCGGGTCTCCTGGACagTCAgTCTCCATCTCCTGCACTGGAACCAGcaGTgATGTTGgTGCTTATAaCTCTGTCTCctGGTACCAACAGCACCCagGCAAAGCCCCCAAACTCATGATTTATGATGTCAATAATCGGCCCTCAGGGGTCCCTGATCGCTTCTCTGGCCCCAAGTCTGGCAACACGGCCTCCCTGACCATCTCTGGACTCCAGGCTGAAGATGAGGCTGATTATTACTGCTGCTCATTTGCAGACAGTTACAATGTCTTCGGAACTGGGACCACGGTCACCGTCCTACGTCAGCCCAAGGCCAACCCCACTGTCACTCTGTTCCCGCCCTCGAGTGAGGAGC
	B2D10H	Homsap IGHV4-34*01 F	Homsap IGHD3-3*01 F	Homsap IGHJ5*02 F	Blasted with previous sequecing	CAGGTGCAGCTACAGCAGTGGGGCACAGGGCTGTTGAAGCCTTCGGAGTCCCTGTTCCTCACCTGCGCTGTCTATAATGAGGACTTGAGTGCTTTCTCCTGGAGTTGGATCCGCCAGTCCCCCGGTAAGGGGCTGGAGTGgATTGGCGAAATCGATCATCTTCaaaACGTCAATTACAATCCGTCCCTCAAGGGTCGGTTCACCATATCAATTGACACGTCCAAGAaTCAGTTCTCCCTGAGGTTCTTCTCTGTGACCGCCGCGGACGCGGCTATGTATTACTGTGCGAGGGGAGGCCGCAAAGTTTATCACCCTTATTGGACTGGCTATGTGAACAATTGCTTTGACCCCTGgGGCCAggGAACCCTGGTCACCGtCTCCTCA																			ne correspond pas au IMGT initial en terme de famille, mais exactement pareil en terme de CDR3 lentgh et V region identity
11	B2D10L	Homsap IGLV3-1*01 F		Homsap IGLJ2*01 F, or Homsap IGLJ3*01 F		TCCTATGAGCTGACTCAGCCACCCTCAGTGTCCGTGTCCCCAGGACAGACAGCCAGCATCACCTGTTATGGAGATAAATTGGGGGACAAACATGCTTGCTGGTATCAGCAGAAGGCAGGCCGGTCCCCTGTGTTGGTCATCTATCAAGATAAAAAGCGGCCCTCAGGGATCCCTGAGCGATTCTCTGGCTCCAACTCTGGGAACACAGCCACTCTGACCATCAGCGGGACCCAGGCTATGGATGAGGCTGAGTATTACTGTCAGGCGTGGGACAGCAGTAGTTATGTGGTATTCGGCGGAGGGACCAAGCTGACCGTCCTA
	B2E9H	Homsap IGHV3-33*01 F	Homsap IGHD3-10*01 F	Homsap IGHJ4*02 F		GAGGTGCAGCTGGTGGAGTCTGGGGGAGGCGTGGTCCAGCCTGGGACGTCCCTGAGACTCTCCTGTGCAGCGTCTGGATTCACCTTCAGTACCTATGGCATGCACTGGGTCCGCCAGGCTCCAGGCAAGGGGCTGGAGTGGGTGGCAGTTATATGGCATGATGGAAGTAATAAATACTATGCAGACTCCGTGAAGGGCCGATTCACCATGTCCAGAGACAATTCCAAGAACACACTGTATCTTCAAATGAACAGCCTGAGAGCCGATGACTCGGCTGTATATTACTGTGCGAGGCCCTCCTACCATGGTTCGGGGAGTTATGGGGGGGGATTTGACTACTGGGGCCAGGGAACCCTGGTCACCGTCTCTTCA
12	B2E9L	Homsap IGLV1-51*02 F		Homsap IGLJ2*01 F, or Homsap IGLJ3*01 F		CAGTCTGTGCTGACGCAGCCGCCCTCAGTGTCTGCGGCCCCAGGACAGAAGGTCACCATCTCCTGCTCTGGAAGCAGCTCCAACATTGGGAGGAACTTTGTATCCTGGTACCAACAACTCCCAGGAACAGCCCCCAGACTCCTCATCTATGAAAATGATAAGCGACCCTCAGGGATTCCTGACCGATTCTCTGGCTCCCAGTCTGGCACGTCAGCCACCCTGGGCATCACCGGACTCCAGACTGGGGACGAGGCCGATTATTACTGCGGAACATGGGATCGCAGTCTGAGTGTTGTATTCGGCGGAGGGACCAAGCTGACCGTCTTAA																			séquence variable obtenue en inférant avec IMGT --> renvoyer à séquencer, même si le chromatogramme est bon ?
